# Supplementary material for: Combinatorial organic materials research (COMR): design, synthesis and screening of a 225-membered materials library of liquid crystalline fluorinated p-quaterphenylsElectronic supplementary information (ESI) available: tables of product yield and purity, and NMR spectra and HPLC traces.. See http://www.rsc.org/suppdata/ob/b2/b212107g/
Source: Royal Society of Chemistry journal article supplement (doi:10.1039/b212107g), 2003-04-09

## Compound numbering in the supplementary data.

The following table gives the three digit numbers “X-Y-X” that are used throughout the data section instead of the  $\mathbf{8}\{T,H,B,T\}$  numbers, that were used in the publication (e.g. compound 1-1-1 corresponds to  $\mathbf{8}\{3,2,5,3\}$ ).

| supplement | publication             |
|------------|-------------------------|------------|-------------------------|------------|-------------------------|------------|-------------------------|------------|-------------------------|
| 1-1-1      | $\mathbf{8}\{3,2,5,3\}$ | 8-2-1      | $\mathbf{8}\{5,1,5,3\}$ | 3-5-1      | $\mathbf{8}\{2,2,1,3\}$ | 2-7-1      | $\mathbf{8}\{1,1,2,3\}$ | 1-9-1      | $\mathbf{8}\{3,4,5,3\}$ |
| 1-1-2      | $\mathbf{8}\{3,2,5,1\}$ | 8-2-2      | $\mathbf{8}\{5,1,5,1\}$ | 3-5-2      | $\mathbf{8}\{2,2,1,1\}$ | 2-7-2      | $\mathbf{8}\{1,1,2,1\}$ | 1-9-2      | $\mathbf{8}\{3,4,5,1\}$ |
| 1-1-3      | $\mathbf{8}\{3,2,5,2\}$ | 8-2-3      | $\mathbf{8}\{5,1,5,2\}$ | 3-5-3      | $\mathbf{8}\{2,2,1,2\}$ | 2-7-3      | $\mathbf{8}\{1,1,2,2\}$ | 1-9-3      | $\mathbf{8}\{3,4,5,2\}$ |
| 1-1-7      | $\mathbf{8}\{3,2,5,4\}$ | 8-2-7      | $\mathbf{8}\{5,1,5,4\}$ | 3-5-7      | $\mathbf{8}\{2,2,1,4\}$ | 2-7-7      | $\mathbf{8}\{1,1,2,4\}$ | 1-9-7      | $\mathbf{8}\{3,4,5,4\}$ |
| 1-1-8      | $\mathbf{8}\{3,2,5,5\}$ | 8-2-8      | $\mathbf{8}\{5,1,5,5\}$ | 3-5-8      | $\mathbf{8}\{2,2,1,5\}$ | 2-7-8      | $\mathbf{8}\{1,1,2,5\}$ | 1-9-8      | $\mathbf{8}\{3,4,5,5\}$ |
| 2-1-1      | $\mathbf{8}\{1,2,5,3\}$ | 1-3-1      | $\mathbf{8}\{3,1,1,3\}$ | 7-5-1      | $\mathbf{8}\{4,2,1,3\}$ | 3-7-1      | $\mathbf{8}\{2,1,2,3\}$ | 2-9-1      | $\mathbf{8}\{1,4,5,3\}$ |
| 2-1-2      | $\mathbf{8}\{1,2,5,1\}$ | 1-3-2      | $\mathbf{8}\{3,1,1,1\}$ | 7-5-2      | $\mathbf{8}\{4,2,1,1\}$ | 3-7-2      | $\mathbf{8}\{2,1,2,1\}$ | 2-9-2      | $\mathbf{8}\{1,4,5,1\}$ |
| 2-1-3      | $\mathbf{8}\{1,2,5,2\}$ | 1-3-7      | $\mathbf{8}\{3,1,1,4\}$ | 7-5-3      | $\mathbf{8}\{4,2,1,2\}$ | 3-7-3      | $\mathbf{8}\{2,1,2,2\}$ | 2-9-3      | $\mathbf{8}\{1,4,5,2\}$ |
| 2-1-7      | $\mathbf{8}\{1,2,5,4\}$ | 2-3-2      | $\mathbf{8}\{1,1,1,1\}$ | 7-5-7      | $\mathbf{8}\{4,2,1,4\}$ | 3-7-7      | $\mathbf{8}\{2,1,2,4\}$ | 2-9-7      | $\mathbf{8}\{1,4,5,4\}$ |
| 2-1-8      | $\mathbf{8}\{1,2,5,5\}$ | 2-3-3      | $\mathbf{8}\{1,1,1,2\}$ | 7-5-8      | $\mathbf{8}\{4,2,1,5\}$ | 3-7-8      | $\mathbf{8}\{2,1,2,5\}$ | 2-9-8      | $\mathbf{8}\{1,4,5,5\}$ |
| 3-1-1      | $\mathbf{8}\{2,2,5,3\}$ | 2-3-7      | $\mathbf{8}\{1,1,1,4\}$ | 8-5-1      | $\mathbf{8}\{5,2,1,3\}$ | 7-7-1      | $\mathbf{8}\{4,1,2,3\}$ | 7-9-1      | $\mathbf{8}\{4,4,5,3\}$ |
| 3-1-2      | $\mathbf{8}\{2,2,5,1\}$ | 3-3-1      | $\mathbf{8}\{2,1,1,3\}$ | 8-5-2      | $\mathbf{8}\{5,2,1,1\}$ | 7-7-2      | $\mathbf{8}\{4,1,2,1\}$ | 7-9-2      | $\mathbf{8}\{4,4,5,1\}$ |
| 3-1-3      | $\mathbf{8}\{2,2,5,2\}$ | 3-3-3      | $\mathbf{8}\{2,1,1,2\}$ | 8-5-3      | $\mathbf{8}\{5,2,1,2\}$ | 7-7-3      | $\mathbf{8}\{4,1,2,2\}$ | 7-9-3      | $\mathbf{8}\{4,4,5,2\}$ |
| 3-1-7      | $\mathbf{8}\{2,2,5,4\}$ | 3-3-8      | $\mathbf{8}\{2,1,1,5\}$ | 8-5-7      | $\mathbf{8}\{5,2,1,4\}$ | 7-7-7      | $\mathbf{8}\{4,1,2,4\}$ | 7-9-7      | $\mathbf{8}\{4,4,5,4\}$ |
| 3-1-8      | $\mathbf{8}\{2,2,5,5\}$ | 7-3-3      | $\mathbf{8}\{4,1,1,2\}$ | 8-5-8      | $\mathbf{8}\{5,2,1,5\}$ | 7-7-8      | $\mathbf{8}\{4,1,2,5\}$ | 7-9-8      | $\mathbf{8}\{4,4,5,5\}$ |
| 7-1-1      | $\mathbf{8}\{4,2,5,3\}$ | 7-3-7      | $\mathbf{8}\{4,1,1,4\}$ | 1-6-1      | $\mathbf{8}\{3,2,2,3\}$ | 8-7-1      | $\mathbf{8}\{5,1,2,3\}$ | 1-10-1     | $\mathbf{8}\{3,4,2,3\}$ |
| 7-1-2      | $\mathbf{8}\{4,2,5,1\}$ | 7-3-8      | $\mathbf{8}\{4,1,1,5\}$ | 1-6-2      | $\mathbf{8}\{3,2,2,1\}$ | 8-7-2      | $\mathbf{8}\{5,1,2,1\}$ | 1-10-2     | $\mathbf{8}\{3,4,2,1\}$ |
| 7-1-3      | $\mathbf{8}\{4,2,5,2\}$ | 8-3-1      | $\mathbf{8}\{5,1,1,3\}$ | 1-6-3      | $\mathbf{8}\{3,2,2,2\}$ | 8-7-3      | $\mathbf{8}\{5,1,2,2\}$ | 1-10-3     | $\mathbf{8}\{3,4,2,2\}$ |
| 7-1-7      | $\mathbf{8}\{4,2,5,4\}$ | 8-3-2      | $\mathbf{8}\{5,1,1,1\}$ | 1-6-7      | $\mathbf{8}\{3,2,2,4\}$ | 8-7-7      | $\mathbf{8}\{5,1,2,4\}$ | 1-10-7     | $\mathbf{8}\{3,4,2,4\}$ |
| 7-1-8      | $\mathbf{8}\{4,2,5,5\}$ | 8-3-8      | $\mathbf{8}\{5,1,1,5\}$ | 1-6-8      | $\mathbf{8}\{3,2,2,5\}$ | 8-7-8      | $\mathbf{8}\{5,1,2,5\}$ | 1-10-8     | $\mathbf{8}\{3,4,2,5\}$ |
| 8-1-1      | $\mathbf{8}\{5,2,5,3\}$ | 1-4-1      | $\mathbf{8}\{3,3,2,3\}$ | 2-6-1      | $\mathbf{8}\{1,2,2,3\}$ | 1-8-1      | $\mathbf{8}\{3,3,5,3\}$ | 2-10-1     | $\mathbf{8}\{1,4,2,3\}$ |
| 8-1-2      | $\mathbf{8}\{5,2,5,1\}$ | 1-4-2      | $\mathbf{8}\{3,3,2,1\}$ | 2-6-2      | $\mathbf{8}\{1,2,2,1\}$ | 1-8-2      | $\mathbf{8}\{3,3,5,1\}$ | 2-10-2     | $\mathbf{8}\{1,4,2,1\}$ |
| 8-1-3      | $\mathbf{8}\{5,2,5,2\}$ | 1-4-7      | $\mathbf{8}\{3,3,2,4\}$ | 2-6-3      | $\mathbf{8}\{1,2,2,2\}$ | 1-8-3      | $\mathbf{8}\{3,3,5,2\}$ | 2-10-3     | $\mathbf{8}\{1,4,2,2\}$ |
| 8-1-7      | $\mathbf{8}\{5,2,5,4\}$ | 2-4-2      | $\mathbf{8}\{1,3,2,1\}$ | 2-6-7      | $\mathbf{8}\{1,2,2,4\}$ | 1-8-7      | $\mathbf{8}\{3,3,5,4\}$ | 2-10-7     | $\mathbf{8}\{1,4,2,4\}$ |
| 8-1-8      | $\mathbf{8}\{5,2,5,5\}$ | 2-4-3      | $\mathbf{8}\{1,3,2,2\}$ | 2-6-8      | $\mathbf{8}\{1,2,2,5\}$ | 1-8-8      | $\mathbf{8}\{3,3,5,5\}$ | 2-10-8     | $\mathbf{8}\{1,4,2,5\}$ |
| 1-2-1      | $\mathbf{8}\{3,1,5,3\}$ | 2-4-7      | $\mathbf{8}\{1,3,2,4\}$ | 3-6-1      | $\mathbf{8}\{2,2,2,3\}$ | 2-8-1      | $\mathbf{8}\{1,3,5,3\}$ | 7-10-1     | $\mathbf{8}\{4,4,2,3\}$ |
| 1-2-2      | $\mathbf{8}\{3,1,5,1\}$ | 3-4-1      | $\mathbf{8}\{2,3,2,3\}$ | 3-6-2      | $\mathbf{8}\{2,2,2,1\}$ | 2-8-2      | $\mathbf{8}\{1,3,5,1\}$ | 7-10-2     | $\mathbf{8}\{4,4,2,1\}$ |
| 1-2-3      | $\mathbf{8}\{3,1,5,2\}$ | 3-4-3      | $\mathbf{8}\{2,3,2,2\}$ | 3-6-3      | $\mathbf{8}\{2,2,2,2\}$ | 2-8-3      | $\mathbf{8}\{1,3,5,2\}$ | 7-10-3     | $\mathbf{8}\{4,4,2,2\}$ |
| 1-2-7      | $\mathbf{8}\{3,1,5,4\}$ | 3-4-8      | $\mathbf{8}\{2,3,2,5\}$ | 3-6-7      | $\mathbf{8}\{2,2,2,4\}$ | 2-8-7      | $\mathbf{8}\{1,3,5,4\}$ | 7-10-7     | $\mathbf{8}\{4,4,2,4\}$ |
| 1-2-8      | $\mathbf{8}\{3,1,5,5\}$ | 7-4-3      | $\mathbf{8}\{4,3,2,2\}$ | 3-6-8      | $\mathbf{8}\{2,2,2,5\}$ | 2-8-8      | $\mathbf{8}\{1,3,5,5\}$ | 7-10-8     | $\mathbf{8}\{4,4,2,5\}$ |
| 2-2-1      | $\mathbf{8}\{1,1,5,3\}$ | 7-4-7      | $\mathbf{8}\{4,3,2,4\}$ | 7-6-1      | $\mathbf{8}\{4,2,2,3\}$ | 3-8-1      | $\mathbf{8}\{2,3,5,3\}$ | 1-11-1     | $\mathbf{8}\{3,4,1,3\}$ |
| 2-2-2      | $\mathbf{8}\{1,1,5,1\}$ | 7-4-8      | $\mathbf{8}\{4,3,2,5\}$ | 7-6-2      | $\mathbf{8}\{4,2,2,1\}$ | 3-8-2      | $\mathbf{8}\{2,3,5,1\}$ | 1-11-2     | $\mathbf{8}\{3,4,1,1\}$ |
| 2-2-3      | $\mathbf{8}\{1,1,5,2\}$ | 8-4-1      | $\mathbf{8}\{5,3,2,3\}$ | 7-6-3      | $\mathbf{8}\{4,2,2,2\}$ | 3-8-3      | $\mathbf{8}\{2,3,5,2\}$ | 1-11-3     | $\mathbf{8}\{3,4,1,2\}$ |
| 2-2-7      | $\mathbf{8}\{1,1,5,4\}$ | 8-4-2      | $\mathbf{8}\{5,3,2,1\}$ | 7-6-7      | $\mathbf{8}\{4,2,2,4\}$ | 3-8-7      | $\mathbf{8}\{2,3,5,4\}$ | 1-11-7     | $\mathbf{8}\{3,4,1,4\}$ |
| 2-2-8      | $\mathbf{8}\{1,1,5,5\}$ | 8-4-8      | $\mathbf{8}\{5,3,2,5\}$ | 7-6-8      | $\mathbf{8}\{4,2,2,5\}$ | 3-8-8      | $\mathbf{8}\{2,3,5,5\}$ | 1-11-8     | $\mathbf{8}\{3,4,1,5\}$ |
| 3-2-1      | $\mathbf{8}\{2,1,5,3\}$ | 1-5-1      | $\mathbf{8}\{3,2,1,3\}$ | 8-6-1      | $\mathbf{8}\{5,2,2,3\}$ | 7-8-1      | $\mathbf{8}\{4,3,5,3\}$ | 2-11-1     | $\mathbf{8}\{1,4,1,3\}$ |
| 3-2-2      | $\mathbf{8}\{2,1,5,1\}$ | 1-5-2      | $\mathbf{8}\{3,2,1,1\}$ | 8-6-2      | $\mathbf{8}\{5,2,2,1\}$ | 7-8-2      | $\mathbf{8}\{4,3,5,1\}$ | 2-11-2     | $\mathbf{8}\{1,4,1,1\}$ |
| 3-2-3      | $\mathbf{8}\{2,1,5,2\}$ | 1-5-3      | $\mathbf{8}\{3,2,1,2\}$ | 8-6-3      | $\mathbf{8}\{5,2,2,2\}$ | 7-8-3      | $\mathbf{8}\{4,3,5,2\}$ | 2-11-3     | $\mathbf{8}\{1,4,1,2\}$ |
| 3-2-7      | $\mathbf{8}\{2,1,5,4\}$ | 1-5-7      | $\mathbf{8}\{3,2,1,4\}$ | 8-6-7      | $\mathbf{8}\{5,2,2,4\}$ | 7-8-7      | $\mathbf{8}\{4,3,5,4\}$ | 2-11-7     | $\mathbf{8}\{1,4,1,4\}$ |
| 3-2-8      | $\mathbf{8}\{2,1,5,5\}$ | 1-5-8      | $\mathbf{8}\{3,2,1,5\}$ | 8-6-8      | $\mathbf{8}\{5,2,2,5\}$ | 7-8-8      | $\mathbf{8}\{4,3,5,5\}$ | 2-11-8     | $\mathbf{8}\{1,4,1,5\}$ |
| 7-2-1      | $\mathbf{8}\{4,1,5,3\}$ | 2-5-1      | $\mathbf{8}\{1,2,1,3\}$ | 1-7-1      | $\mathbf{8}\{3,1,2,3\}$ | 8-8-1      | $\mathbf{8}\{5,3,5,3\}$ | 7-11-1     | $\mathbf{8}\{4,4,1,3\}$ |
| 7-2-2      | $\mathbf{8}\{4,1,5,1\}$ | 2-5-2      | $\mathbf{8}\{1,2,1,1\}$ | 1-7-2      | $\mathbf{8}\{3,1,2,1\}$ | 8-8-2      | $\mathbf{8}\{5,3,5,1\}$ | 7-11-2     | $\mathbf{8}\{4,4,1,1\}$ |
| 7-2-3      | $\mathbf{8}\{4,1,5,2\}$ | 2-5-3      | $\mathbf{8}\{1,2,1,2\}$ | 1-7-3      | $\mathbf{8}\{3,1,2,2\}$ | 8-8-3      | $\mathbf{8}\{5,3,5,2\}$ | 7-11-3     | $\mathbf{8}\{4,4,1,2\}$ |
| 7-2-7      | $\mathbf{8}\{4,1,5,4\}$ | 2-5-7      | $\mathbf{8}\{1,2,1,4\}$ | 1-7-7      | $\mathbf{8}\{3,1,2,4\}$ | 8-8-7      | $\mathbf{8}\{5,3,5,4\}$ | 7-11-7     | $\mathbf{8}\{4,4,1,4\}$ |
| 7-2-8      | $\mathbf{8}\{4,1,5,5\}$ | 2-5-8      | $\mathbf{8}\{1,2,1,5\}$ | 1-7-8      | $\mathbf{8}\{3,1,2,5\}$ | 8-8-8      | $\mathbf{8}\{5,3,5,5\}$ | 7-11-8     | $\mathbf{8}\{4,4,1,5\}$ |

118 400.1 MHz

2,3,2',3',2'',3'''-Hexafluoro-4,4'''-dipropyl-[1,4':1',1'':4'',1''']quaterphenyl

7.5261  
7.3665  
7.3550  
7.2600  
7.2114  
7.1321  
7.0298

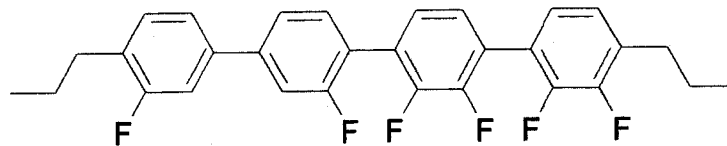

2.7363  
2.6621

1.7636  
1.6506

1.0360  
0.9839

0.0091

| Identifier | Chem. Shift [ppm] | J [Hz] | Multiplicity |
|------------|-------------------|--------|--------------|
| 1          | 2.7184            | 7.3894 | 3            |
| 2          | 2.6814            | 7.5789 | 3            |
| 3          | 1.7163            | 7.5536 | 6            |
| 4          | 1.6974            | 7.5536 | 6            |
| 5          | 1.0181            | 7.1368 | 3            |
| 6          | 1.0021            | 7.2631 | 3            |

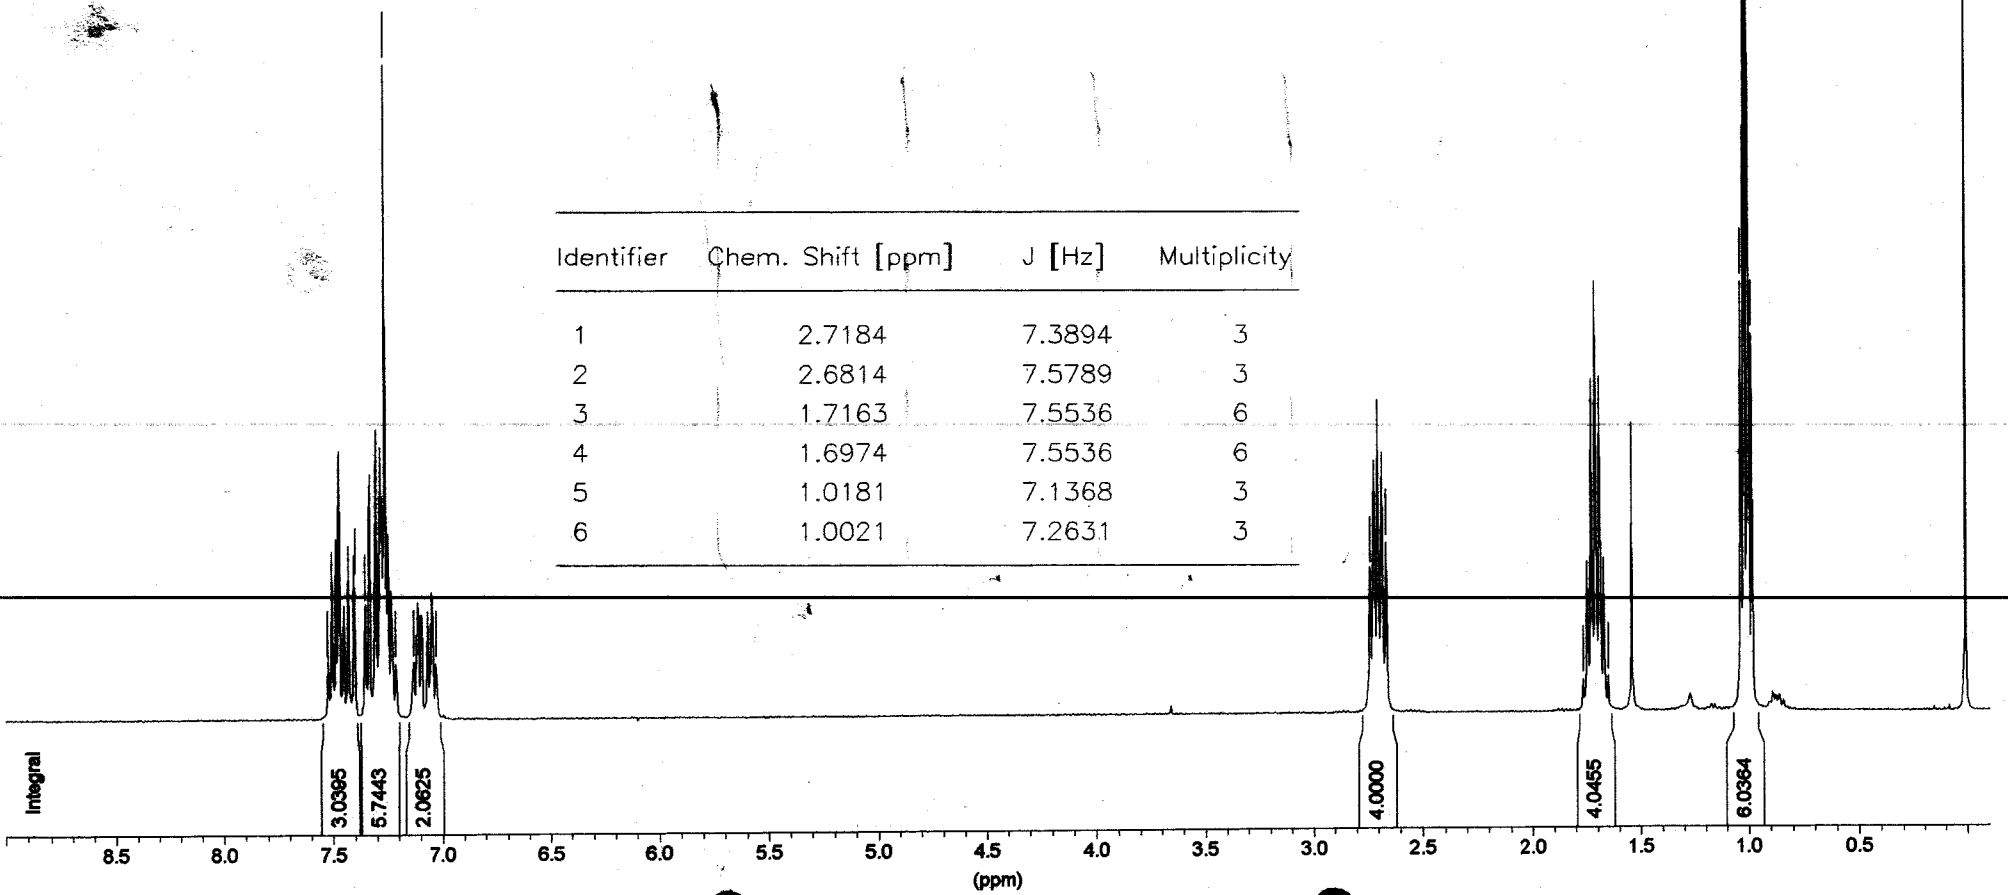

118 100.6 MHz

2,3,2',3',2'',3'''-Hexafluoro-4,4''-dipropyl-[1,4':1',1'':4'',1''']quaterphenyl

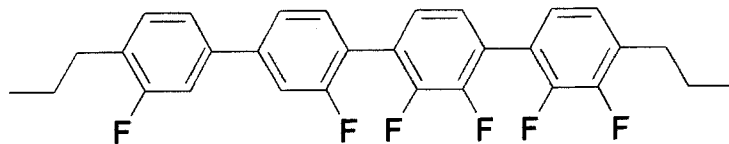

162.7248  
161.2769  
160.2877  
158.7875  
150.5355  
149.6301  
149.2529  
148.0871  
147.1138  
142.6385  
138.7637  
132.2271  
131.7442  
131.2010  
129.3373  
125.5006  
125.0328  
124.8932  
124.3273  
122.3052  
121.1922  
114.2054  
113.5490

| Identifier | Chem. Shift [ppm] | J [Hz]              | Multiplicity  |
|------------|-------------------|---------------------|---------------|
| 1          | 161.5063          | 245.2034            | 2             |
| 2          | 160.0406          | 249.3787            | 2             |
| 3          | 149.3755          | 246.3421<br>12.9054 | 2<br>2        |
| 4          | 148.4493          | 253.1744<br>15.5624 | 2<br>2        |
| 5          | 148.4097          | 253.5540<br>16.3216 | 2<br>2        |
| 6          | 148.0758          | 250.8970<br>14.0442 | 2<br>2        |
| 7          | 142.5904          | 7.9710<br>1.8979    | 2<br>2        |
| 8          | 138.7839          | 7.9710<br>1.8979    | 2<br>2        |
| 9          | 132.2931          | 13.2850             | 2             |
| 10         | 131.7442          | -                   | 1             |
| 11         | 131.2311          | 6.0731              | 2             |
| 12         | 129.4203          | 16.7012             | 2             |
| 13         | 125.5986          | -                   | 1 <i>br.s</i> |
| 14         | 125.5006          | -                   | 1 <i>br.s</i> |
| 15         | 125.1195          | -                   | 1 <i>br.s</i> |
| 16         | 125.0328          | -                   | 1 <i>br.s</i> |
| 17         | 124.8944          | 4.3651              | 3             |
| 18         | 124.3952          | 11.7667<br>1.8979   | 2<br>2        |
| 19         | 122.6296          | 3.0366              | 2             |
| 20         | 122.3203          | 3.0366              | 2             |
| 21         | 121.5186          | 12.5259<br>2.2774   | 2<br>2        |
| 22         | 121.1026          | 15.3727<br>2.4672   | 2<br>2        |
| 23         | 114.3205          | 23.1539             | 2             |
| 24         | 113.6659          | 23.5335             | 2             |
| 25         | 30.8498           | -                   | 1             |
| 26         | 30.8120           | -                   | 1             |
| 27         | 23.2782           | -                   | 1             |
| 28         | 23.1499           | -                   | 1             |
| 29         | 13.8089           | -                   | 1             |
| 30         | 13.7750           | -                   | 1             |

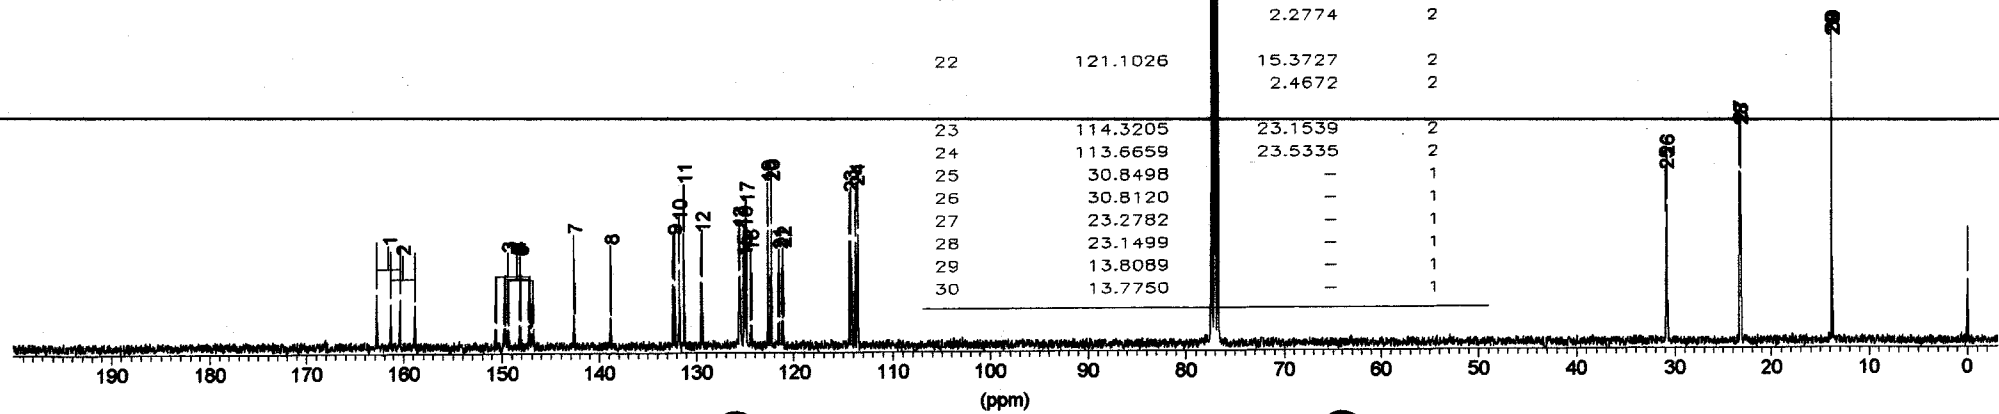

30.8498  
30.8120  
23.2782  
23.1499  
13.8089  
13.7750  
-0.0252

212 400.1 MHz

2',3,2'-Trifluoro-4,4"-dipropyl-[1,4':1',1":4",1''']quaterphenyl

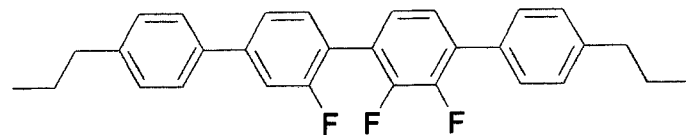

7.5785  
7.4283  
7.3244  
7.2338

2.6952  
2.6513

1.7725  
1.6721  
1.5370

1.0316  
0.9889

0.0267

| Identifier | Chem. Shift [ppm] | J [Hz] | Multiplic |
|------------|-------------------|--------|-----------|
| 1          | 2.6764            | 7.5157 | 3         |
| 2          | 2.6706            | 7.6420 | 3         |
| 3          | 1.7258            | 7.5283 | 6         |
| 4          | 1.7185            | 7.5283 | 6         |
| 5          | 1.0134            | 7.2631 | 3         |
| 6          | 1.0073            | 7.3262 | 3         |

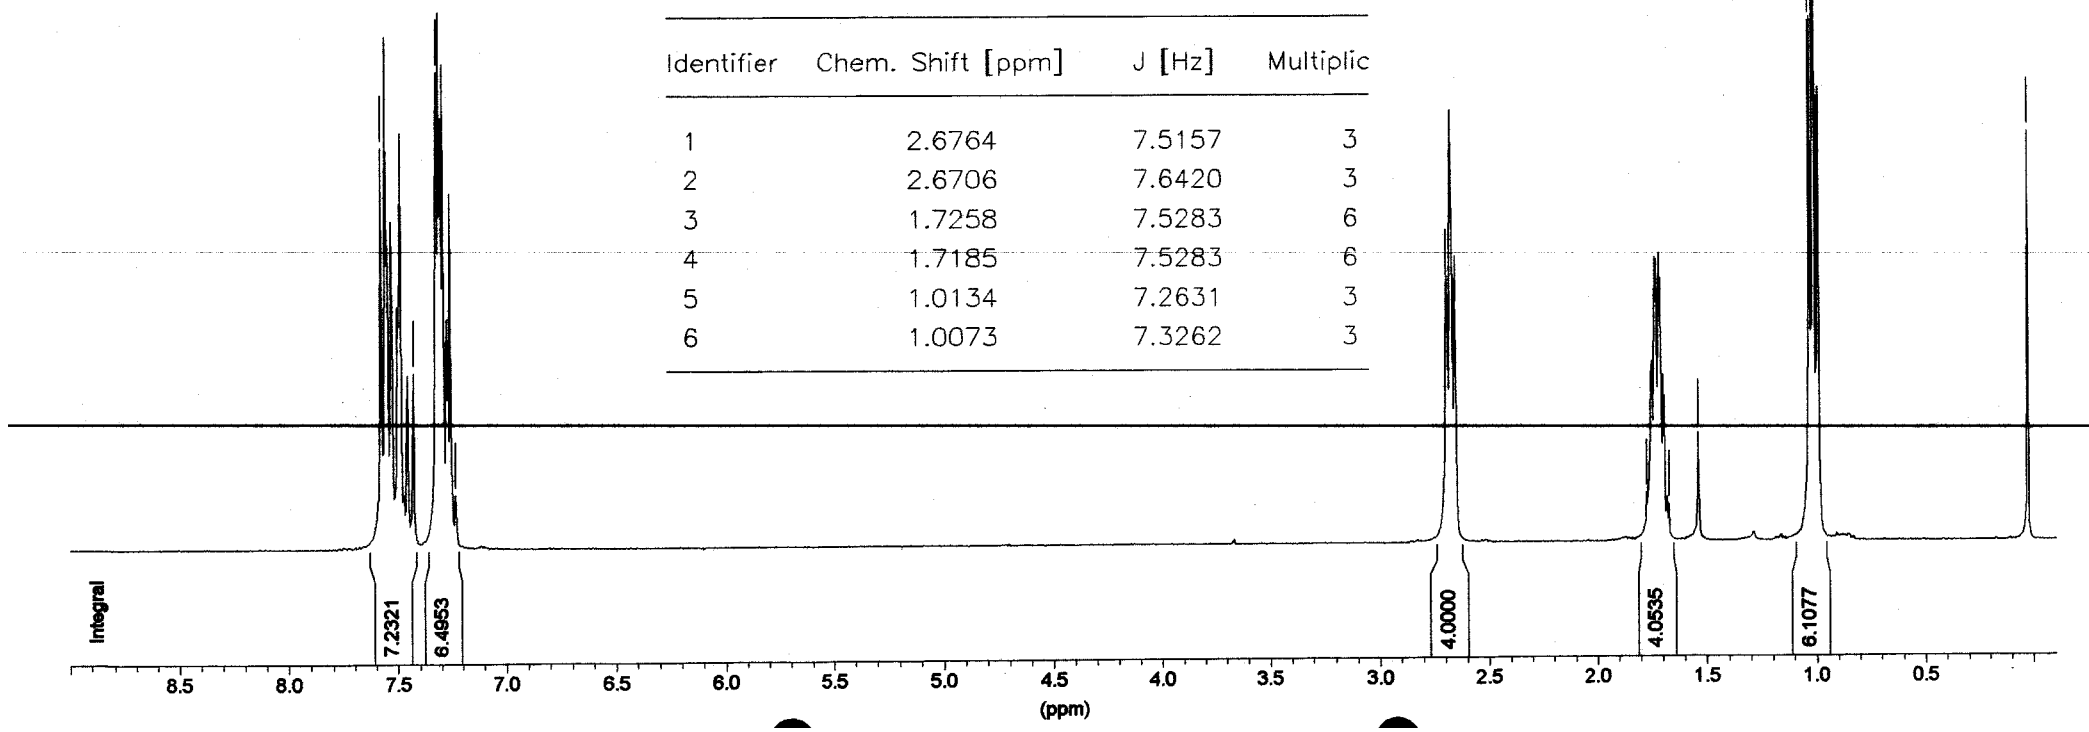

Integral

7.2321

6.4953

4.0000

4.0535

6.1077

(ppm)

212 100.6 MHz

2,3,2'-Trifluoro-4,4"-dipropyl-[1,4':1",1":4",1"']quaterphenyl

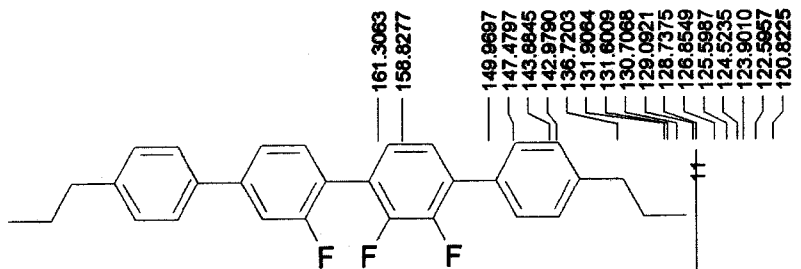

| Identifier | Chem. Shift [ppm] | J [Hz]              | Multiplicity               |
|------------|-------------------|---------------------|----------------------------|
| 1          | 160.0670          | 249.3787            | 2                          |
| 2          | 148.6549          | 250.1379<br>14.4237 | 2<br>2                     |
| 3          | 148.3333          | 249.5685<br>13.8544 | 2<br>2                     |
| 4          | 143.6430          | 8.3506              | 2                          |
| 5          | 142.9149          | 12.9054             | 2                          |
| 6          | 136.7108          | 1.8979              | 2                          |
| 7          | 131.9064          | -                   | 1                          |
| 8          | 131.6160          | -                   | 1 br. s                    |
| 9          | 130.6539          | 10.6280             | 2                          |
| 10         | 129.0921          | -                   | 1                          |
| 11         | 128.7601          | -                   | 1 2 sign. (high intensity) |
| 12         | 128.7375          | -                   | 1                          |
| 13         | 126.8549          | -                   | 1                          |
| 14         | 125.5987          | -                   | 1 br. s                    |
| 15         | 124.5260          | 3.4161              | 3                          |
| 16         | 123.8387          | 12.5259             | 2                          |
| 17         | 122.6126          | 3.4161              | 2                          |
| 18         | 120.7584          | 15.1829<br>2.2774   | 2<br>2                     |
| 19         | 114.2337          | 23.1539             | 2                          |
| 20         | 37.8027           | -                   | 1                          |
| 21         | 37.7084           | -                   | 1                          |
| 22         | 24.4778           | -                   | 1                          |
| 23         | 24.4401           | -                   | 1                          |
| 24         | 13.8731           | -                   | 1                          |
| 25         | 13.8467           | -                   | 1                          |

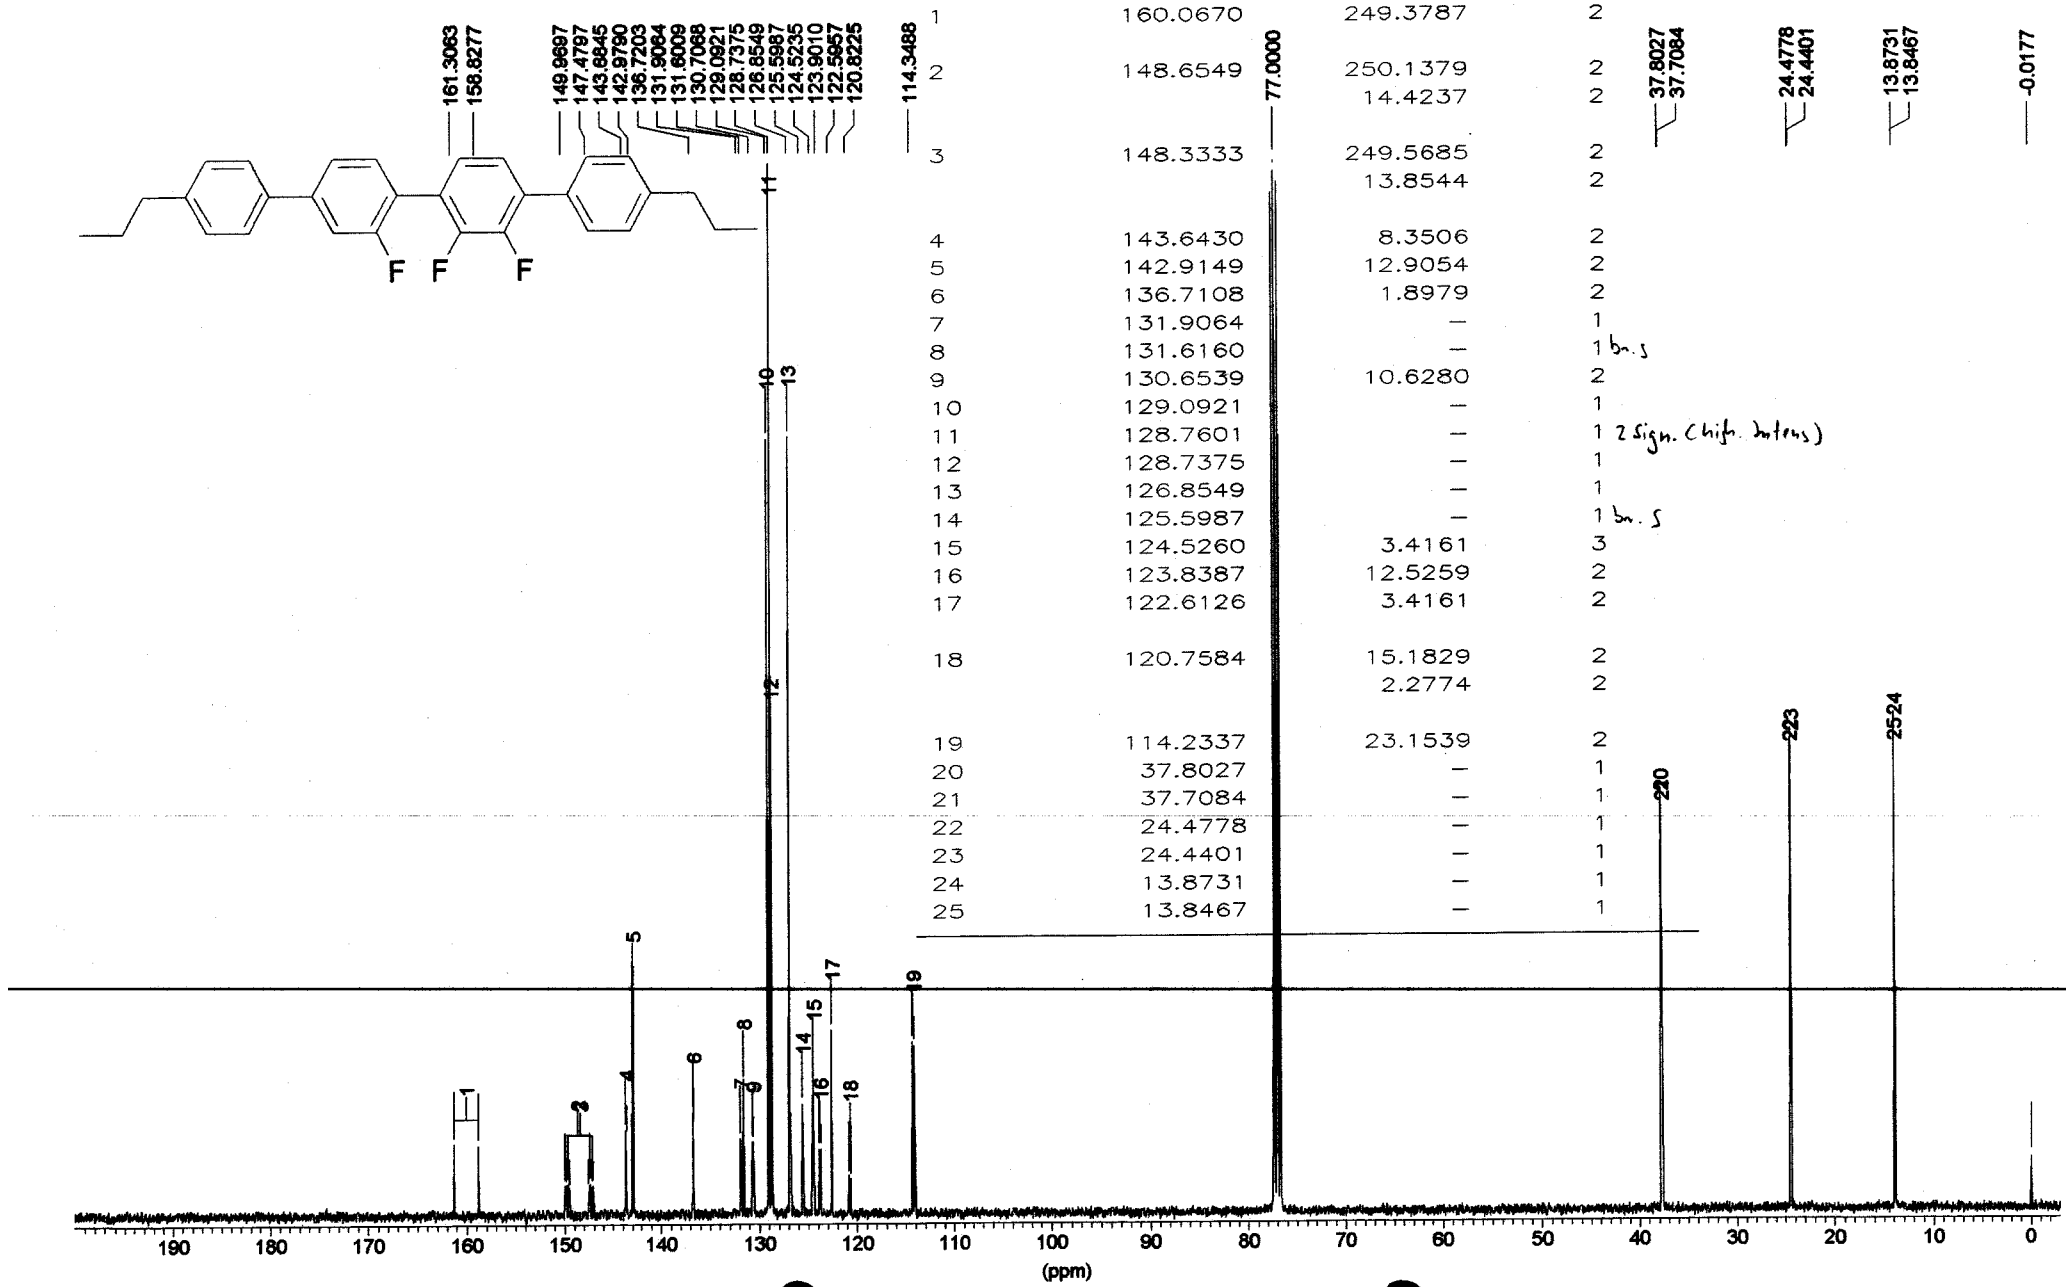

711 400.1 MHz

3,5,2',2'',3'',3'''-Hexafluoro-4,4'''-dipropyl-[1,4':1',1'':4'',1''']quaterphenyl

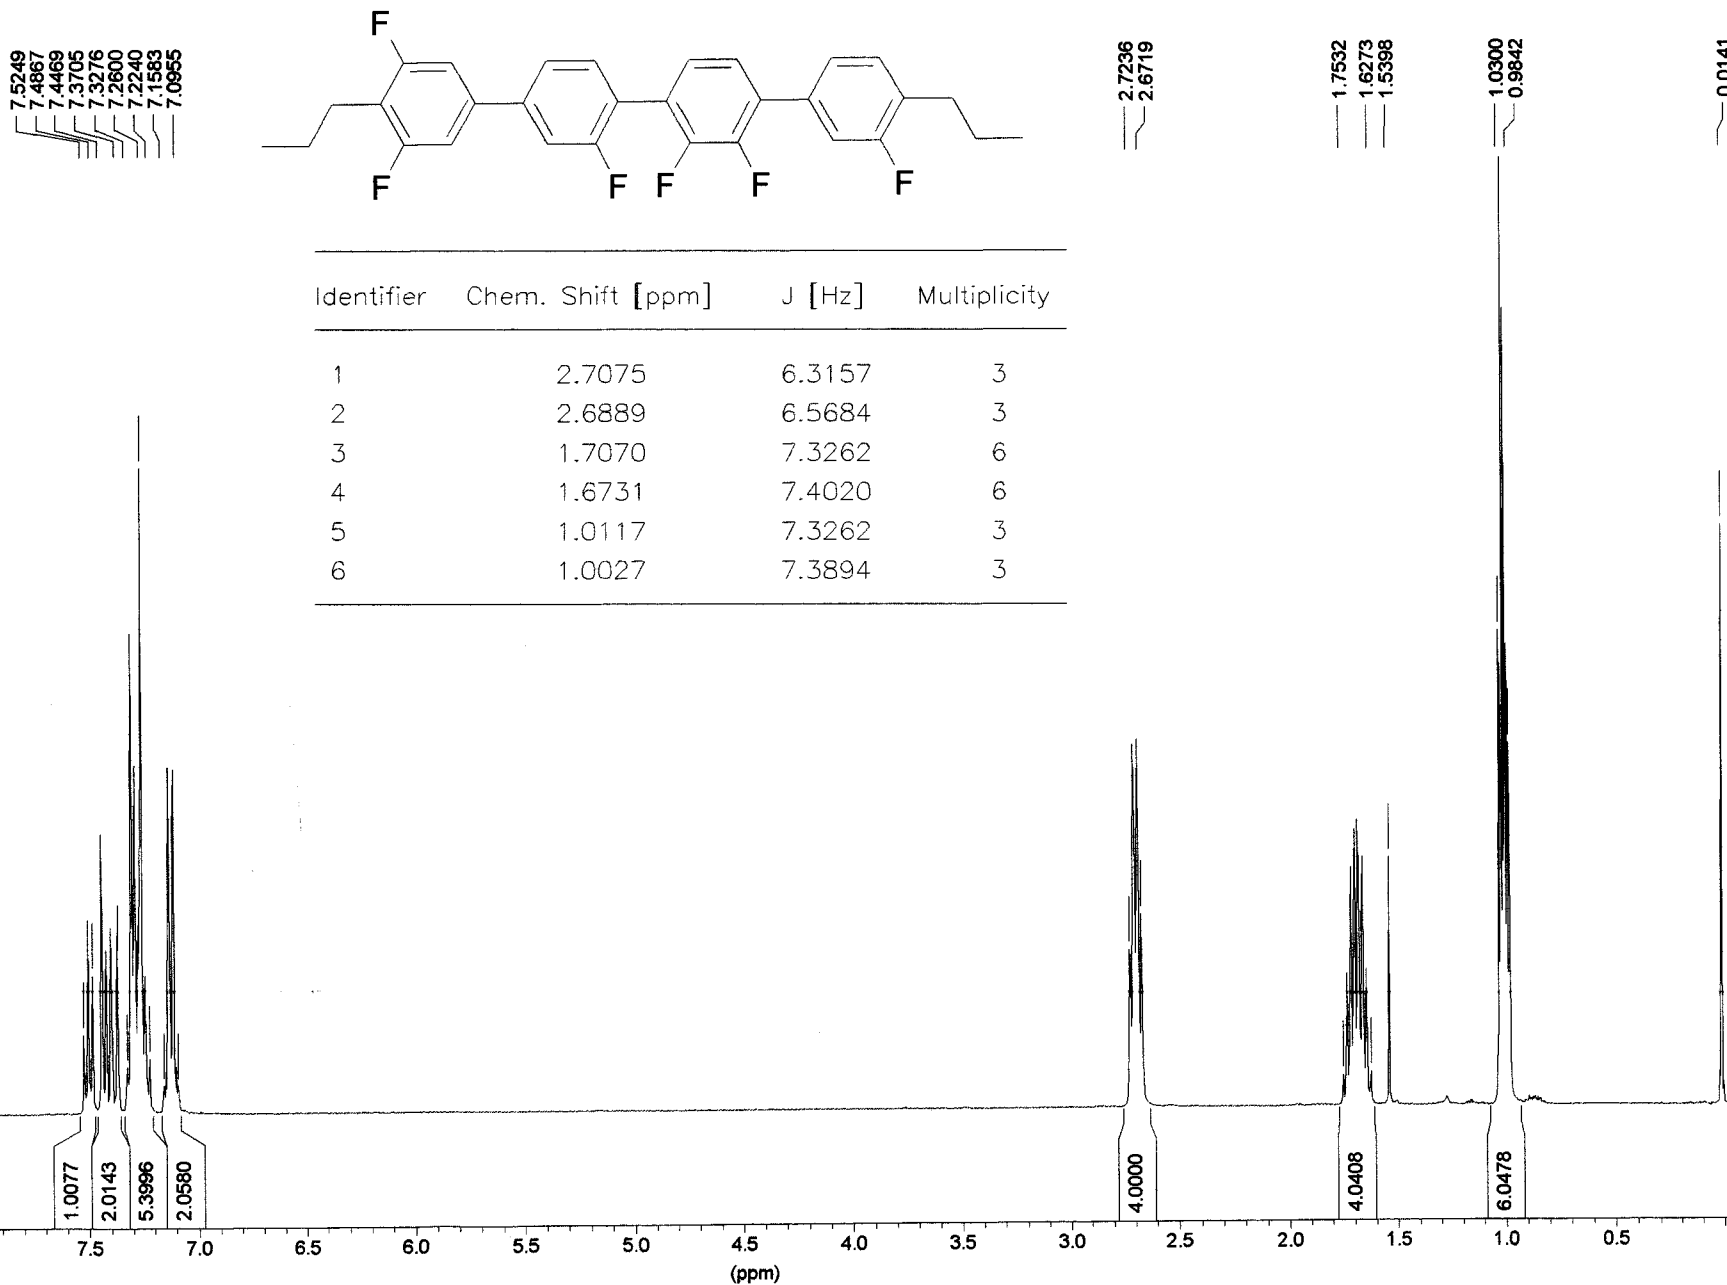

711 400.1 MHz

3,5,2',2'',3'',3'''.Hexafluoro-4,4''-dipropyl-[1,4':1'',1'':4'',1''']quaterphenyl

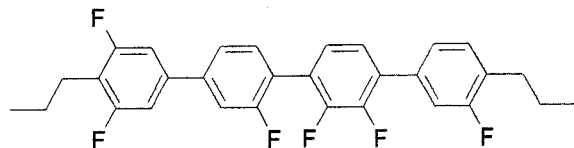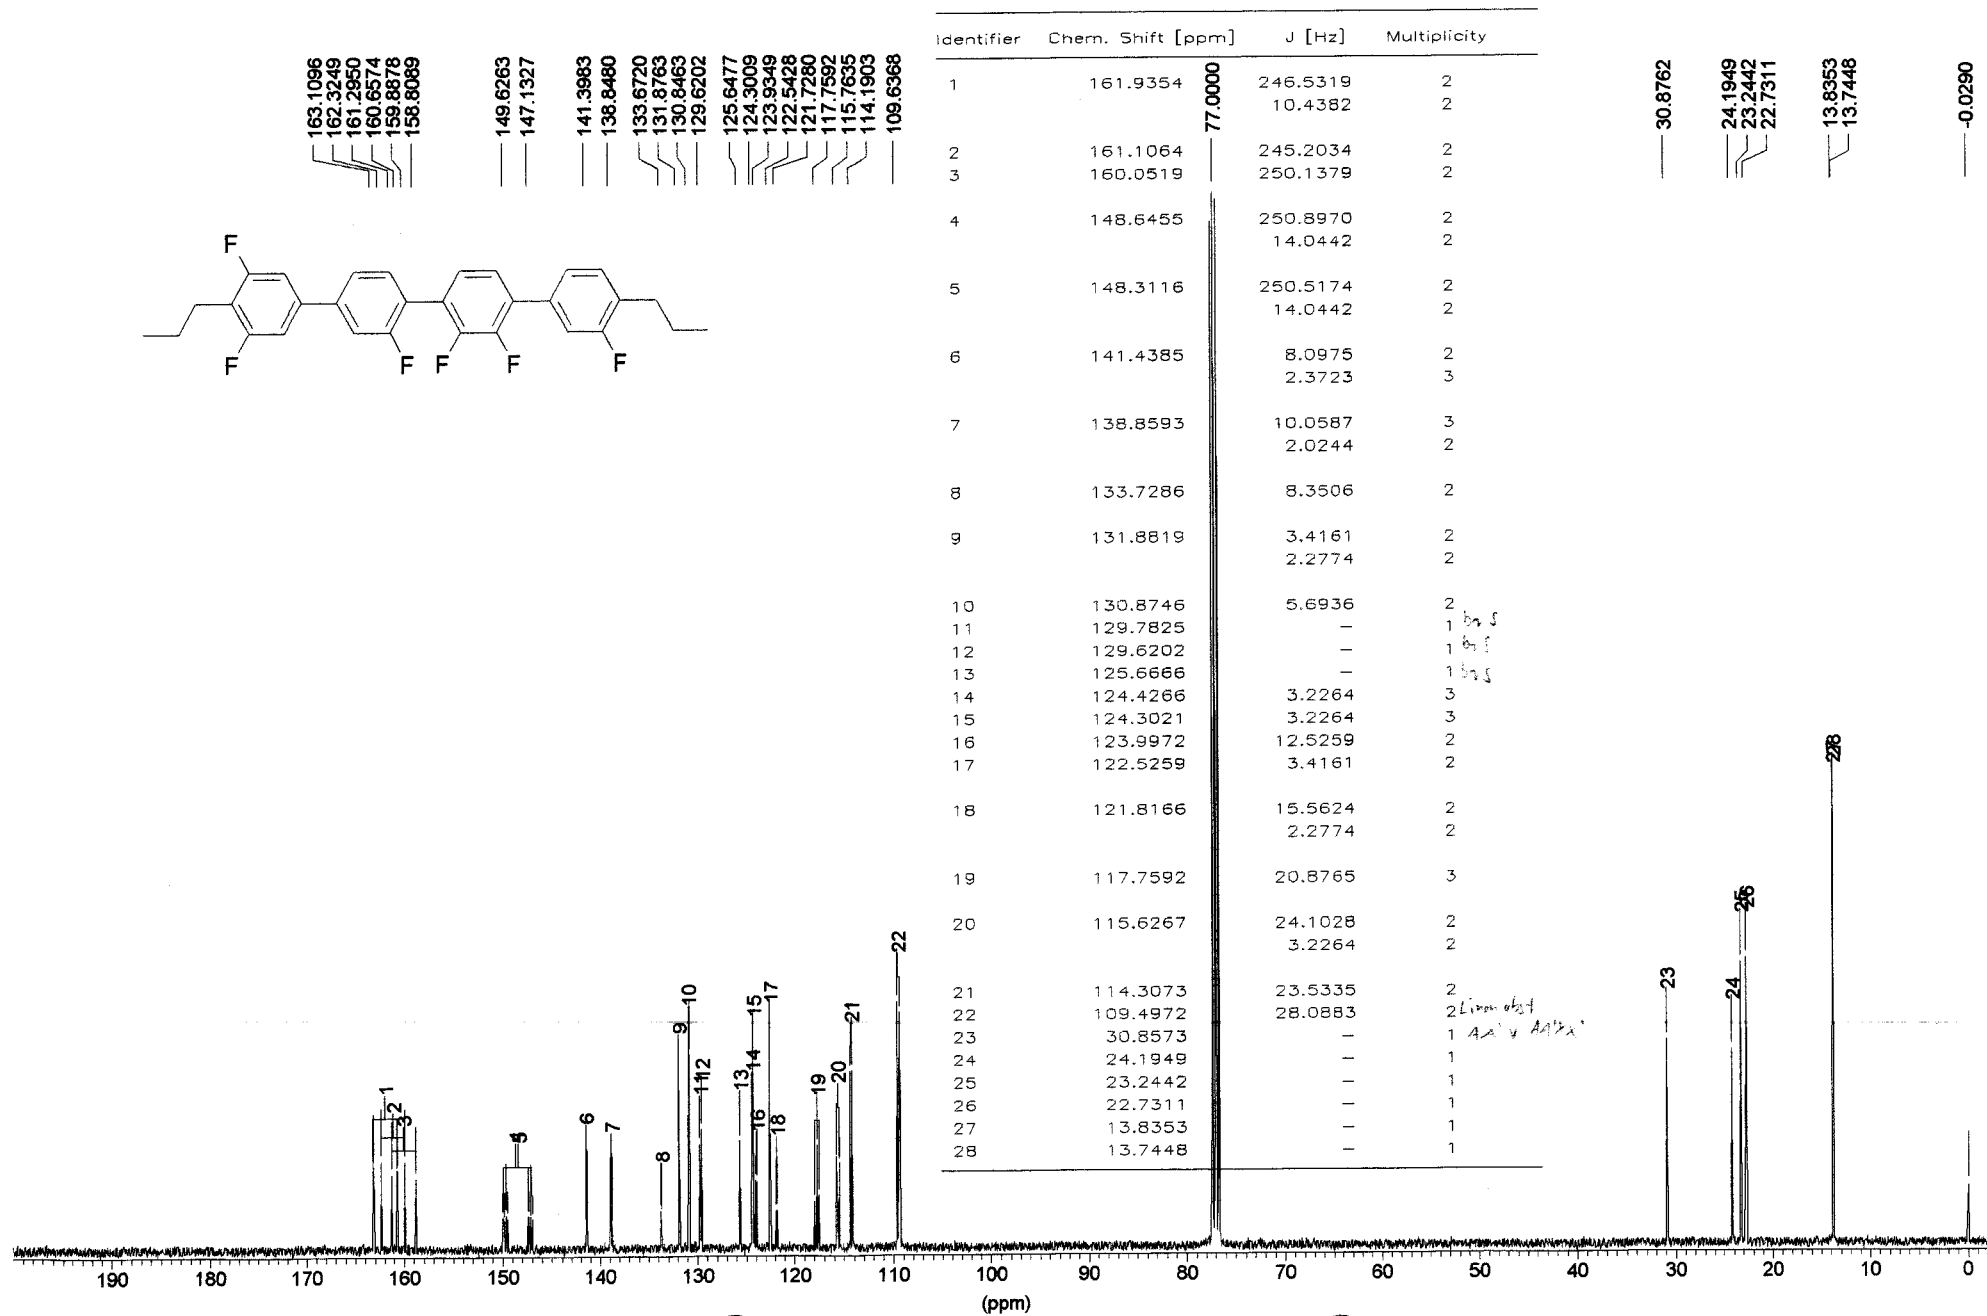

127 400.1 MHz

3,2'',3'',5''-Pentafluoro-4,4''-dipropyl-[1,1':4',1'':4'',1''']quaterphenyl

7.7092  
7.6473  
7.3708  
7.2335  
7.1552  
7.0949

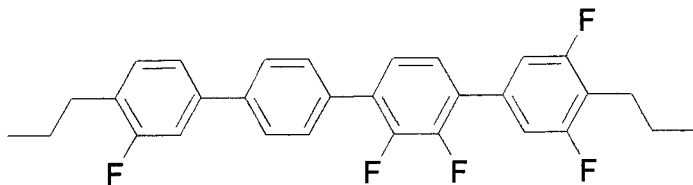

2.7353  
2.6636

1.7494  
1.6374  
1.5404  
1.2797  
1.0287  
0.9921

0.0182

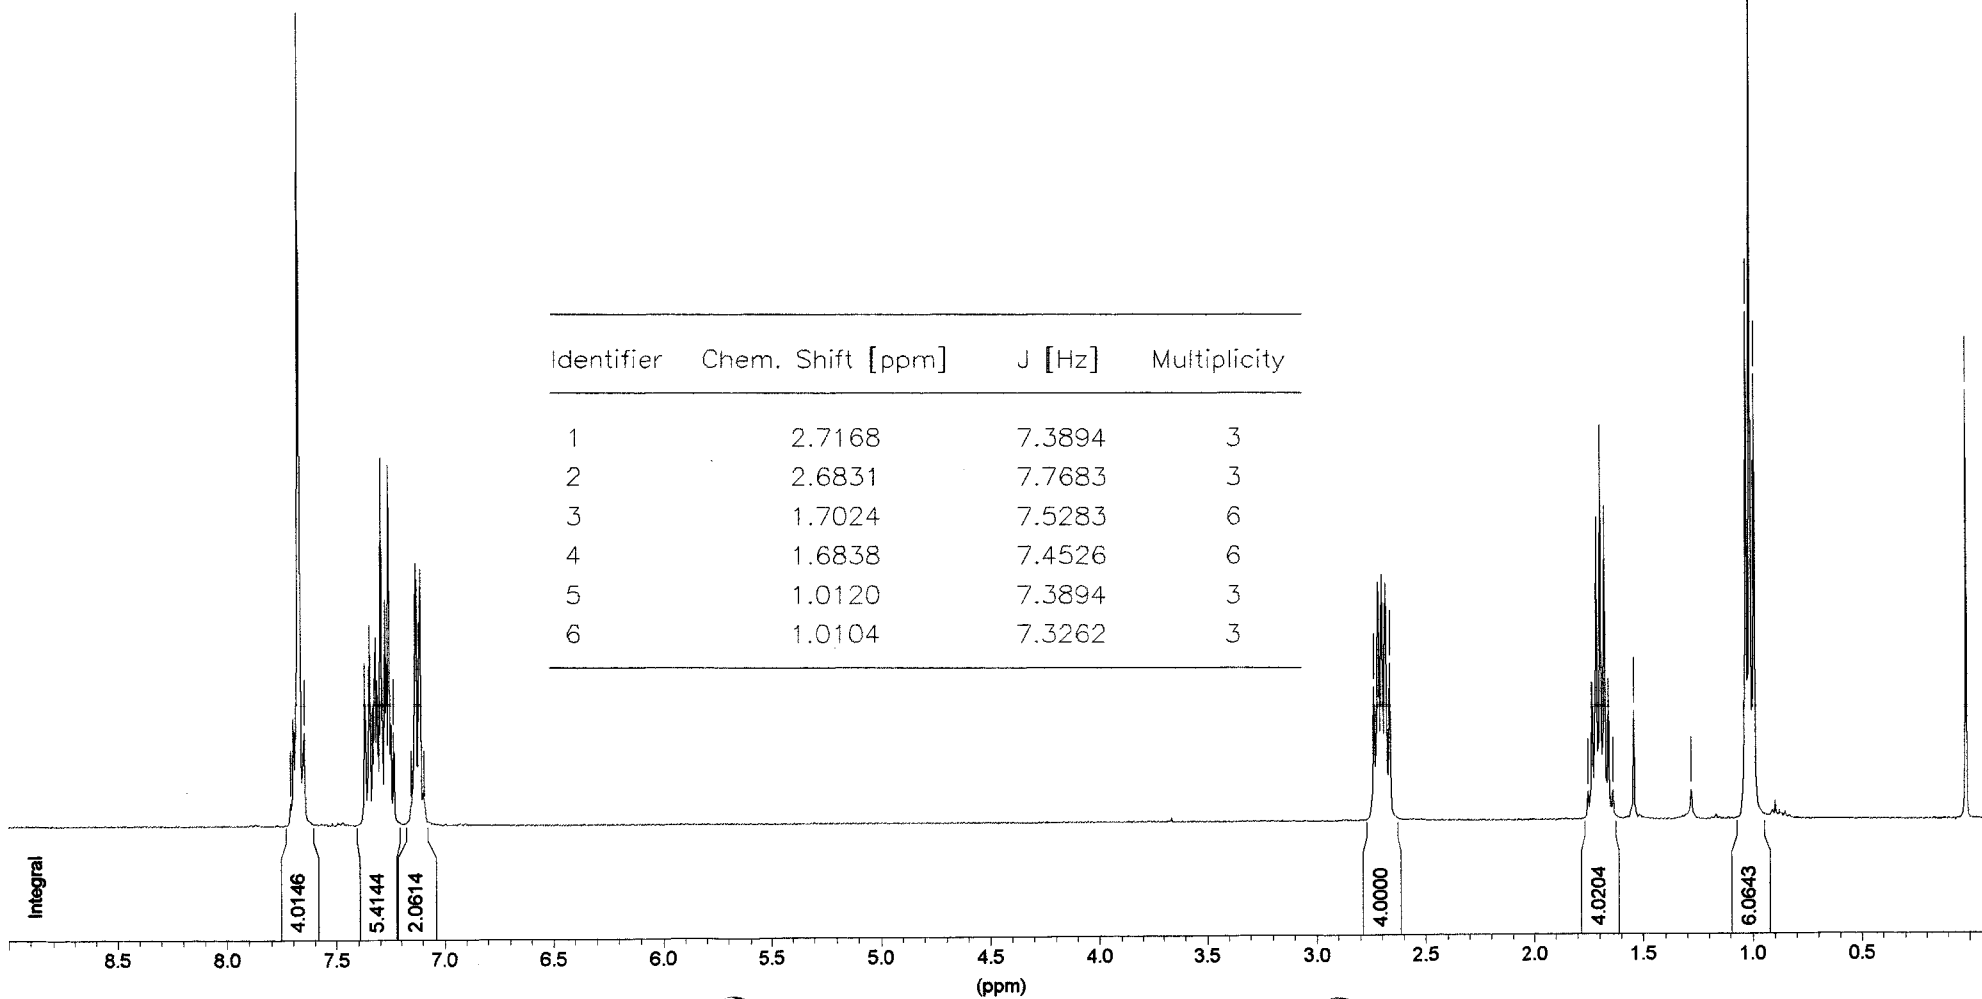



127 100.6 MHz

3,2'',3'',3'',5''-Pentafluoro-4,4''-dipropyl-[1,1':4',1'':4'',1''']quaterphenyl

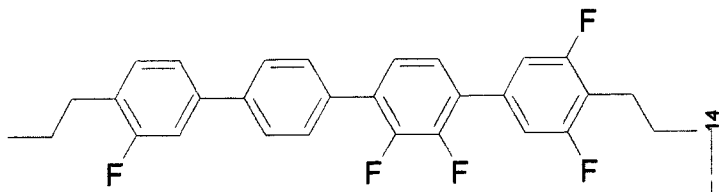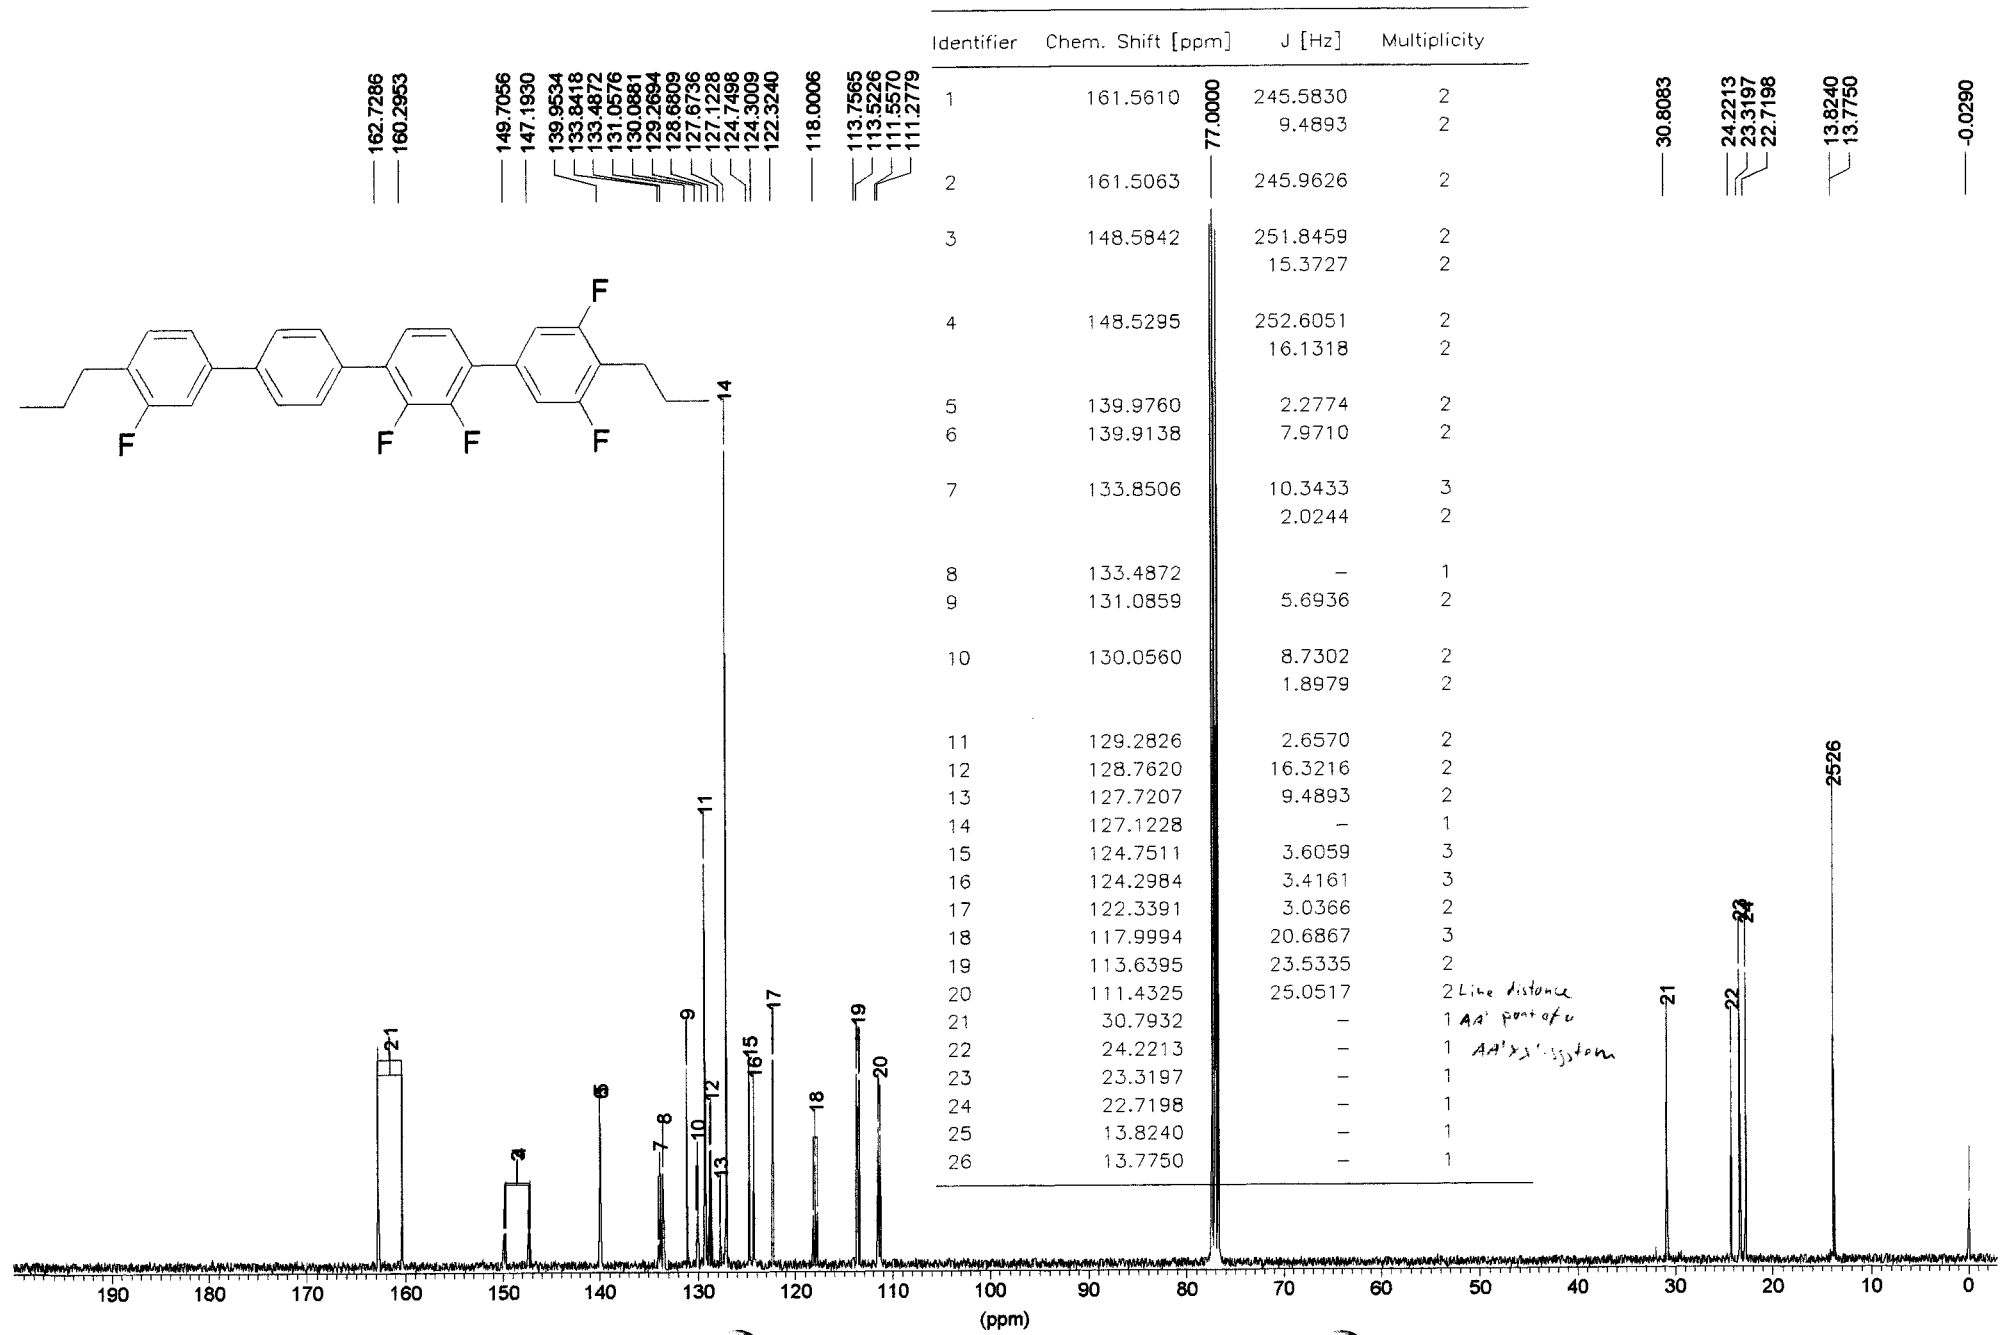

728 400.1 MHz

3,5,2'',3'',2''',3'''-Hexafluoro-4,4''-dipropyl-[1,1':4',1'':4'',1''']quaterphenyl

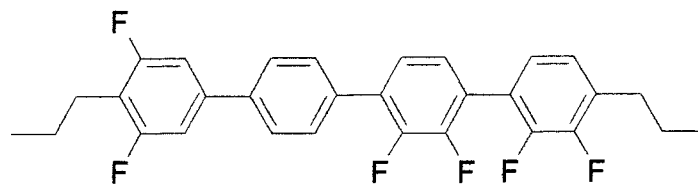

7.6941  
7.6445

7.3348

7.0270

2.7366  
2.6839

1.7646

1.6282

1.5332

1.2753

1.0376

0.9848

0.0129

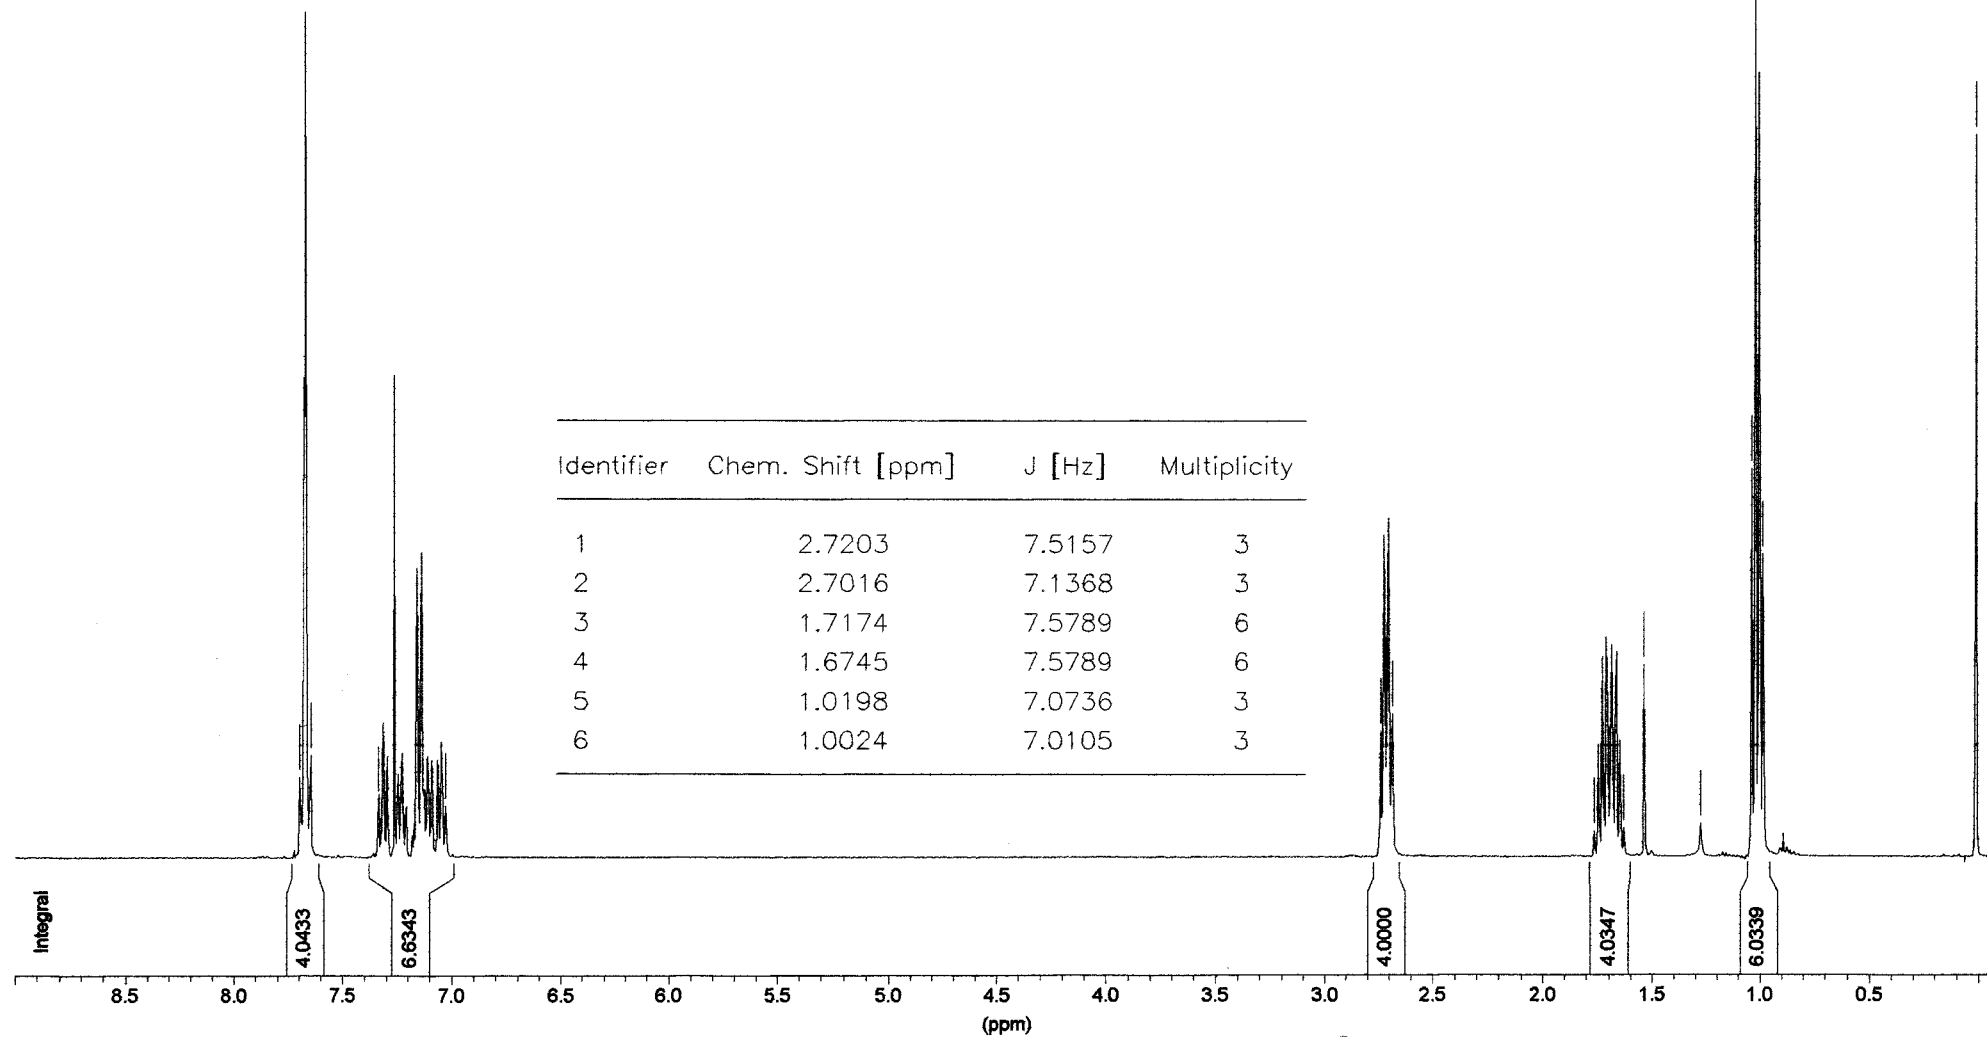

728 100.6 MHz

3,5,2',3',2'',3'''-Hexafluoro-4,4'''-dipropyl-[1,1':4',1'':4'',1''':4''']quaterphenyl

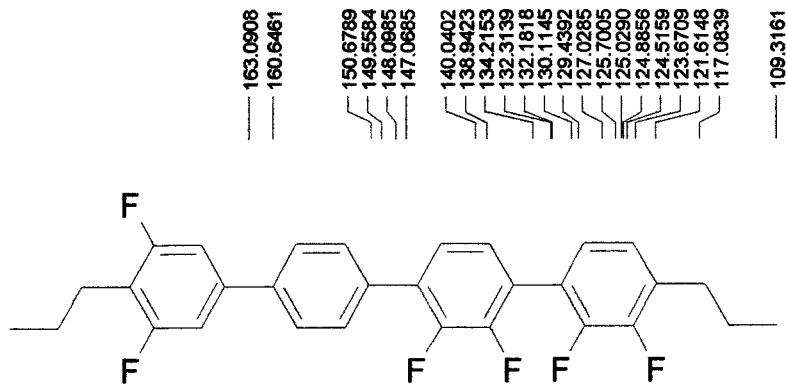

163.0908  
160.6461  
150.6789  
149.5584  
148.0985  
147.0685  
140.0402  
138.9423  
134.2153  
132.3139  
132.1818  
130.1145  
129.4392  
127.0285  
125.7005  
125.0290  
124.8856  
124.5159  
123.6709  
121.6148  
117.0839  
109.3161

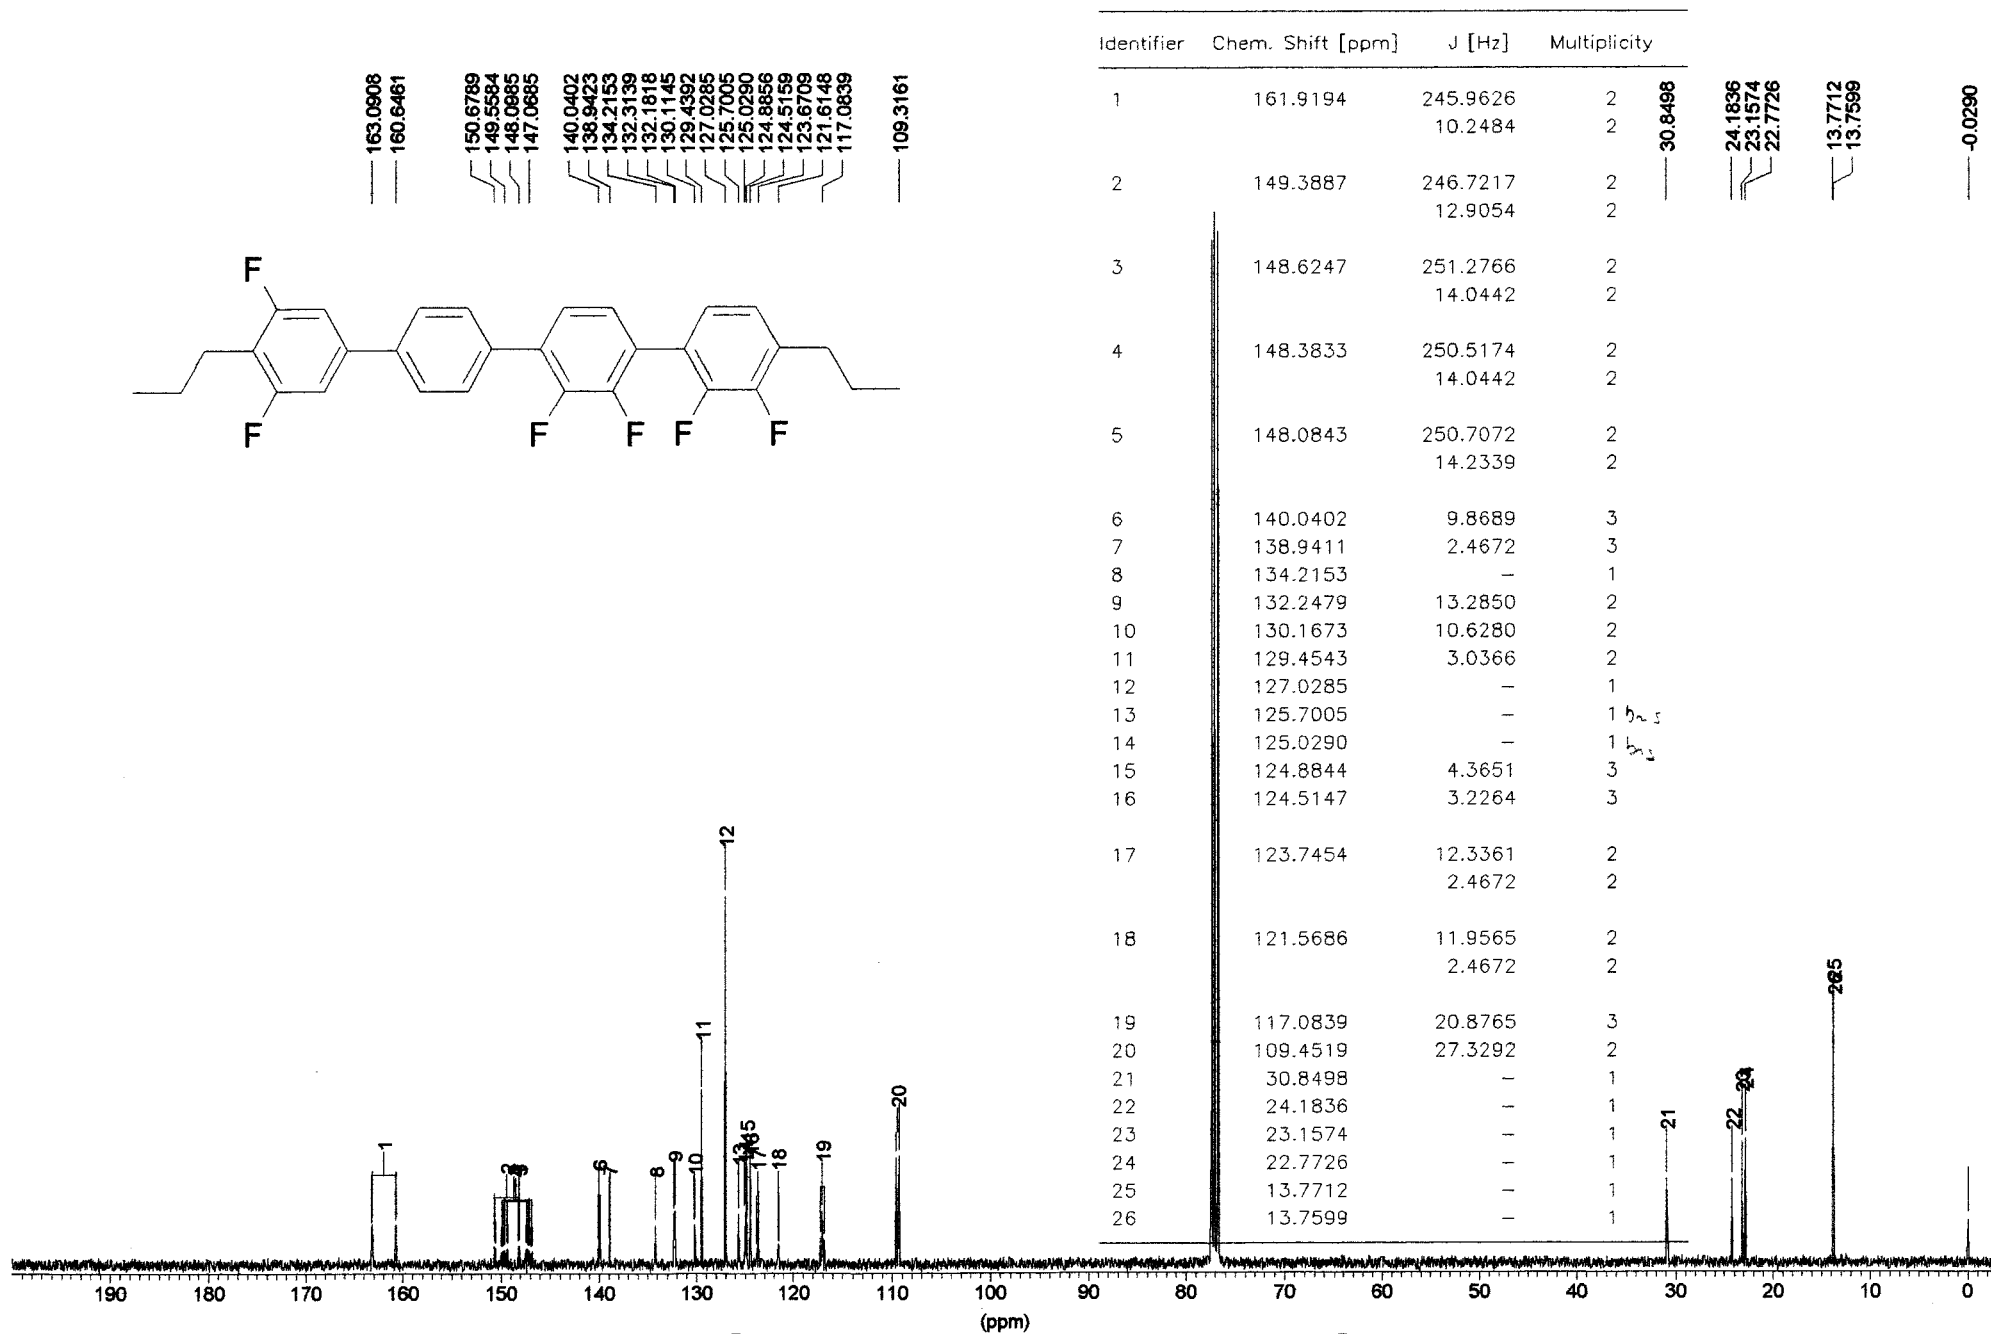

822 400.1 MHz

2,3,2',3'-Tetrafluoro-4,4'''-dipropyl-[1,1':4',1'':4'',1''']quaterphenyl

7.7073  
7.6524  
7.5299  
7.3228  
7.2963  
7.2600  
7.1792  
7.0521

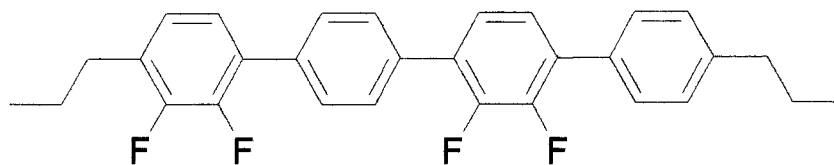

2.6949

1.7147

1.5376

1.2904

1.0129

0.9069

0.0280

| Identifier | Chem. Shift [ppm] | J [Hz] | Multiplicity |
|------------|-------------------|--------|--------------|
| 1          | 7.5399            | 7.9578 | 2            |
| 2          | 7.1791            | 8.1789 | 2            |
|            |                   | 6.7894 | 2            |
|            |                   | 1.5474 | 2            |
| 3          | 7.0322            | 7.7999 | 2            |
|            |                   | 6.6631 | 2            |
|            |                   | 1.1053 | 2            |
| 4          | 2.7138            | 7.5789 | 3            |
| 5          | 2.6761            | 7.8315 | 3            |
| 6          | 1.7244            | 7.4526 | 6            |
| 7          | 1.7214            | 7.5283 | 6            |
| 8          | 1.0243            | 7.3262 | 3            |
| 9          | 1.0129            | 7.3262 | 3            |

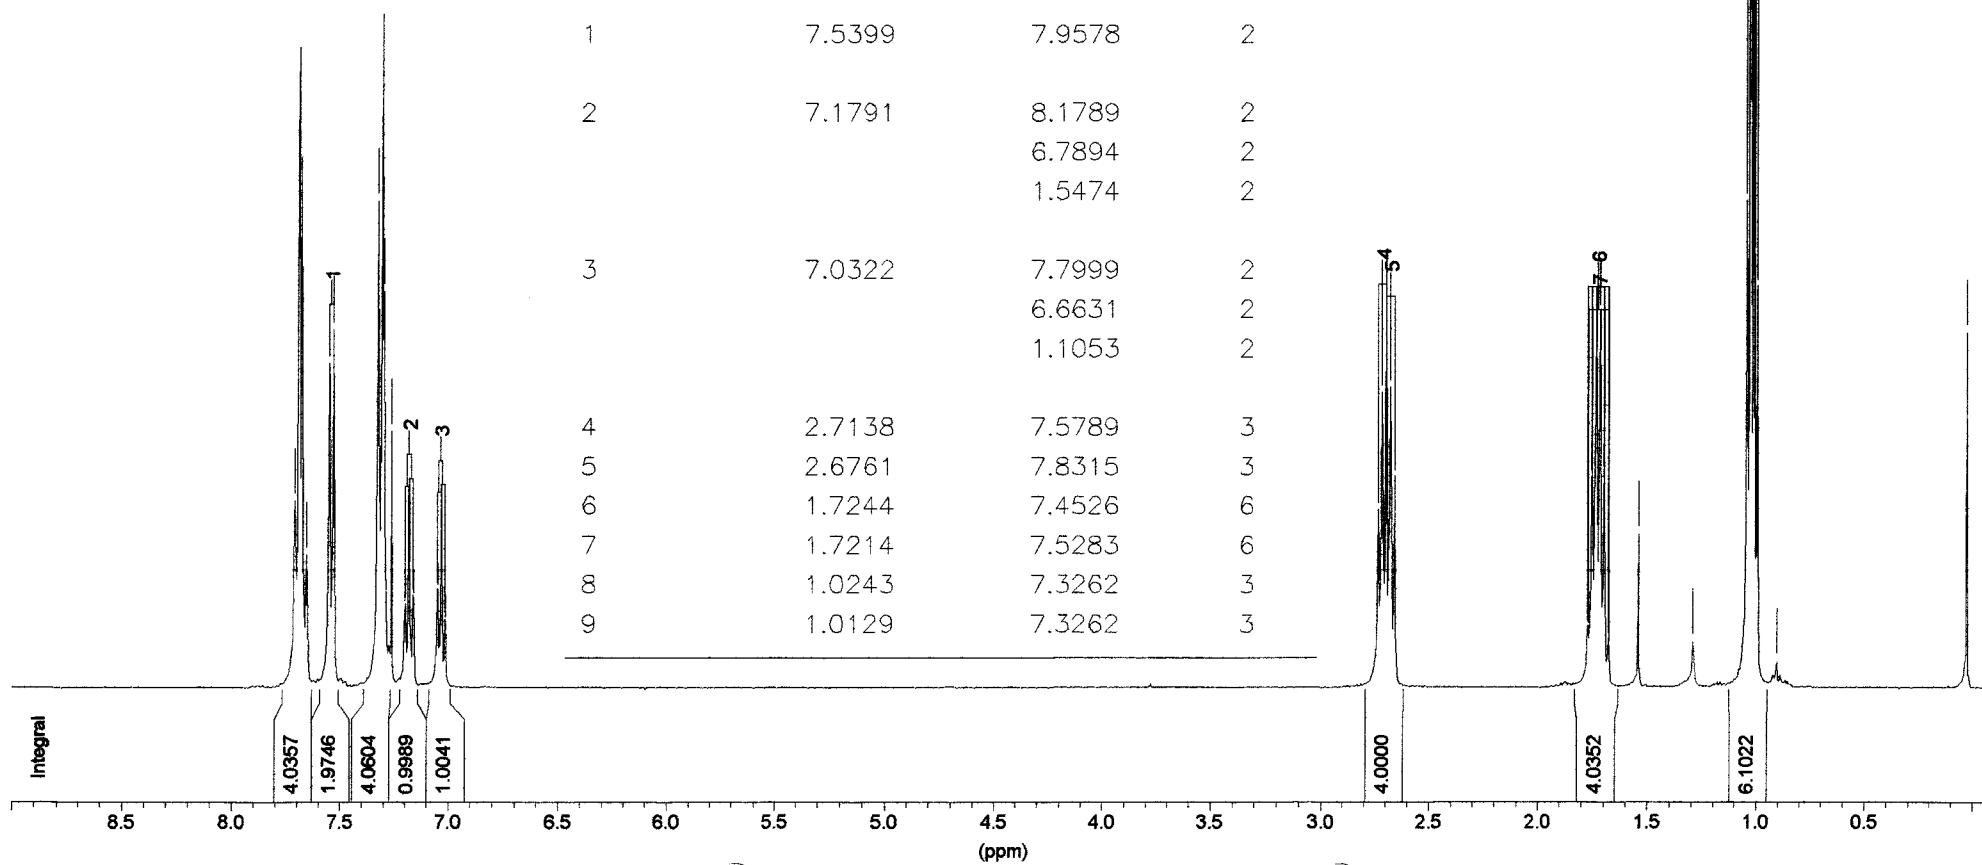

## 2,3,2'',3''-Tetrafluoro-4,4''-dipropyl-[1,1':4'',1'':4''',1''']quaterphenyl

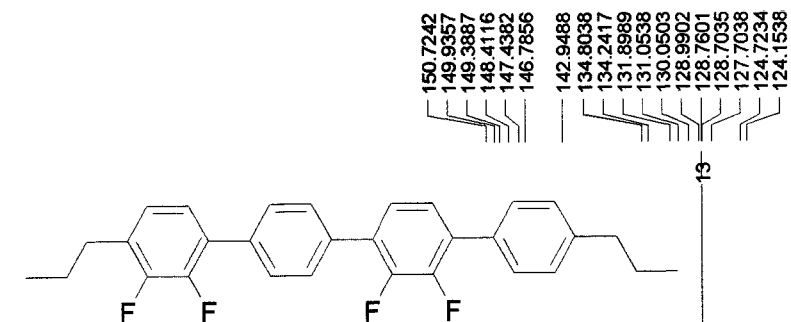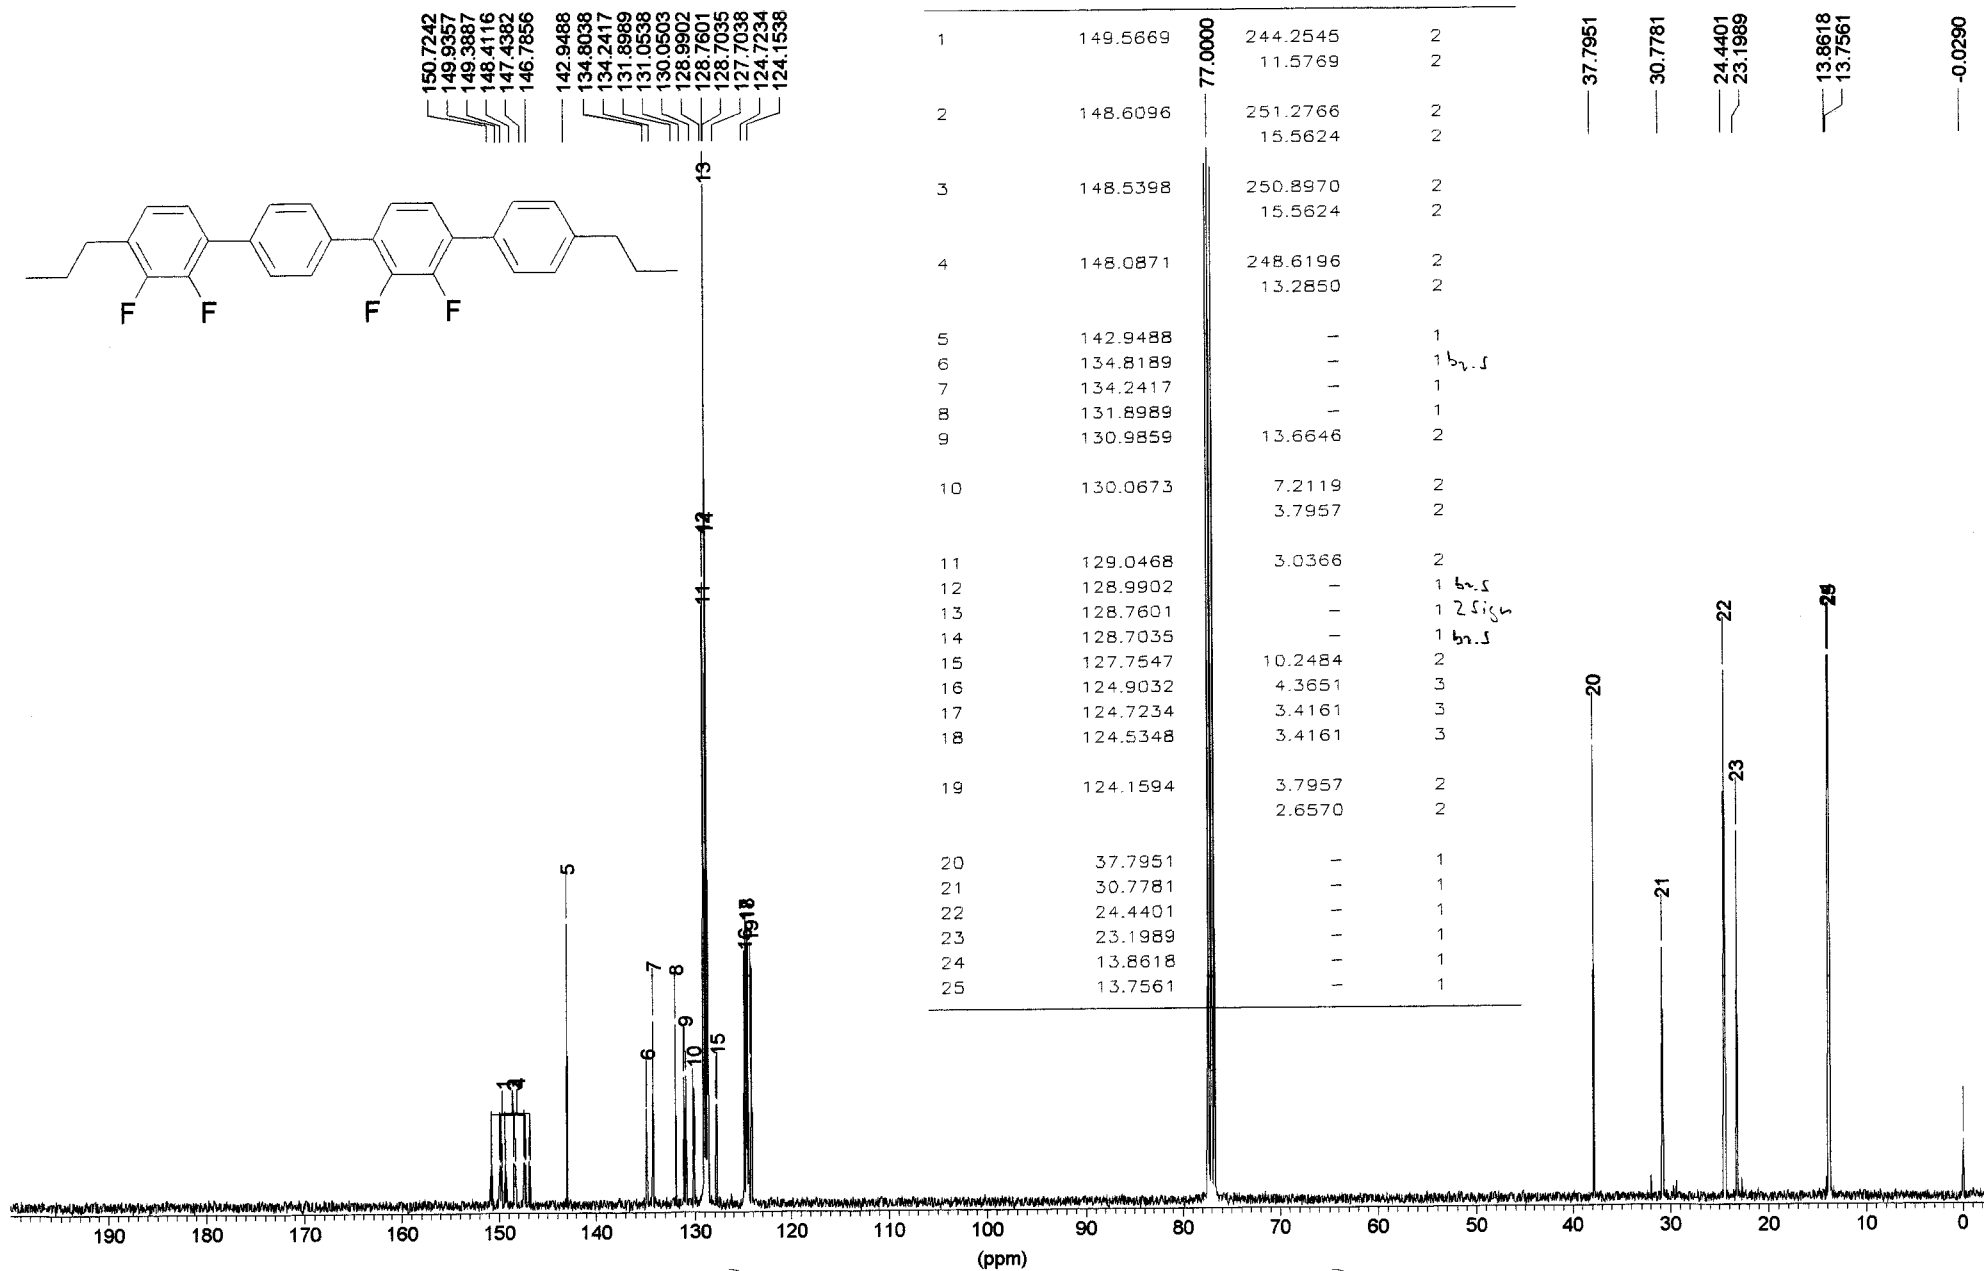

737 400.1 MHz

3,5,3',5'-Tetrafluoro-4,4'-dipropyl-[1,1';4',1'';4'',1''']quaterphenyl

7.7250  
7.6306  
7.2600  
7.1741  
7.1116

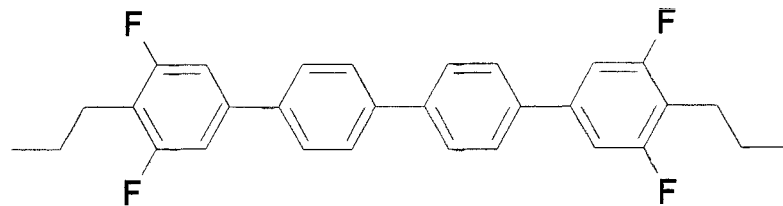

2.7167  
2.6977  
2.6791

1.7166  
1.6980  
1.6793  
1.6607  
1.6421  
1.6238  
1.5360

1.0189  
1.0003  
0.9820

0.0100

| Identifier | Chem. Shift [ppm] | J [Hz] | Multiplicity |
|------------|-------------------|--------|--------------|
| 1          | 2.6978            | 7.5157 | 3            |
| 2          | 1.6701            | 7.4273 | 6            |
| 3          | 1.0004            | 7.3894 | 3            |

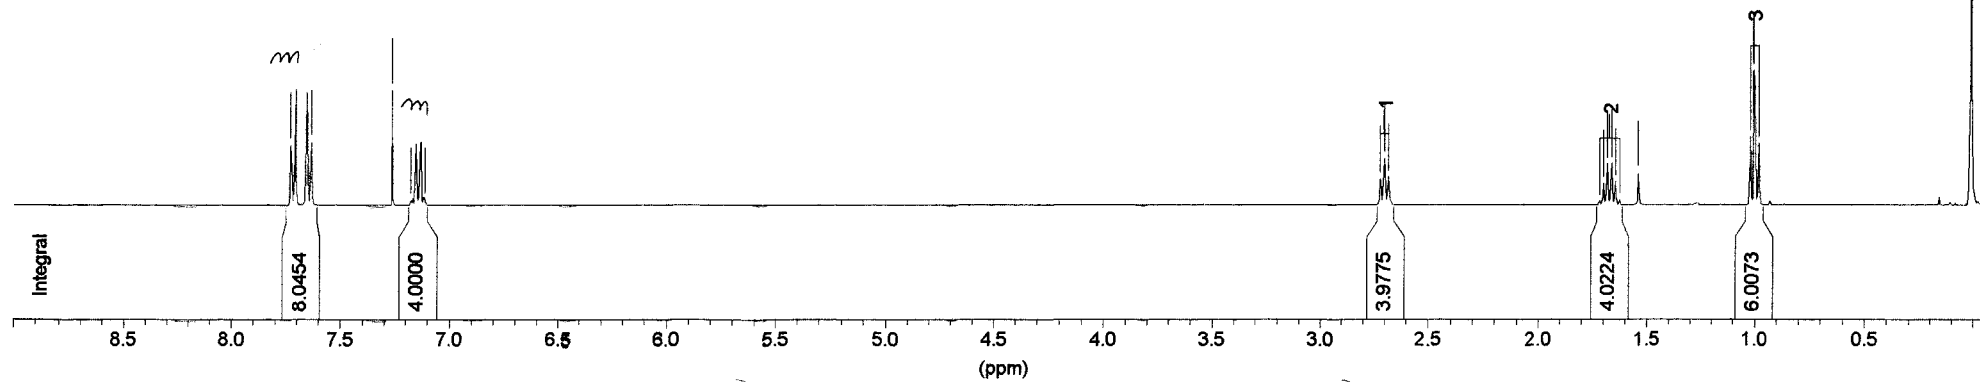

737 100.6 MHz

3,5,3',5'-Tetrafluoro-4,4"-dipropyl-[1,1':4',1'':4'':1''']quaterphenyl

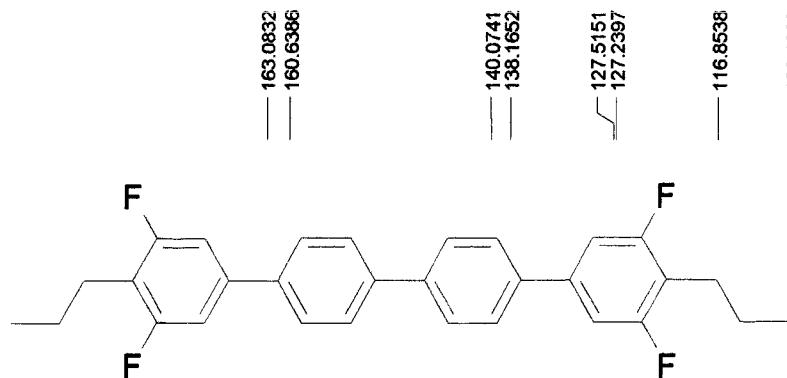

| Identifier | Chem. Shift [ppm] | J [Hz]              | Multiplicity                    |
|------------|-------------------|---------------------|---------------------------------|
| 1          | 161.9128          | 245.7728<br>10.4382 | 2<br>2                          |
| 2          | 140.2099          | 9.8689              | 3                               |
| 3          | 140.0741          | -                   | 1                               |
| 4          | 138.1639          | 2.4672              | 3                               |
| 5          | 127.5151          | -                   | 1                               |
| 6          | 127.2397          | -                   | 1                               |
| 7          | 116.8538          | 20.8765             | 3                               |
| 8          | 109.3369          | 27.7087             | 2 Line distance AA' part of nA. |
| 9          | 24.1836           | -                   | 1                               |
| 10         | 22.7915           | -                   | 1                               |
| 11         | 13.7674           | -                   | 1                               |

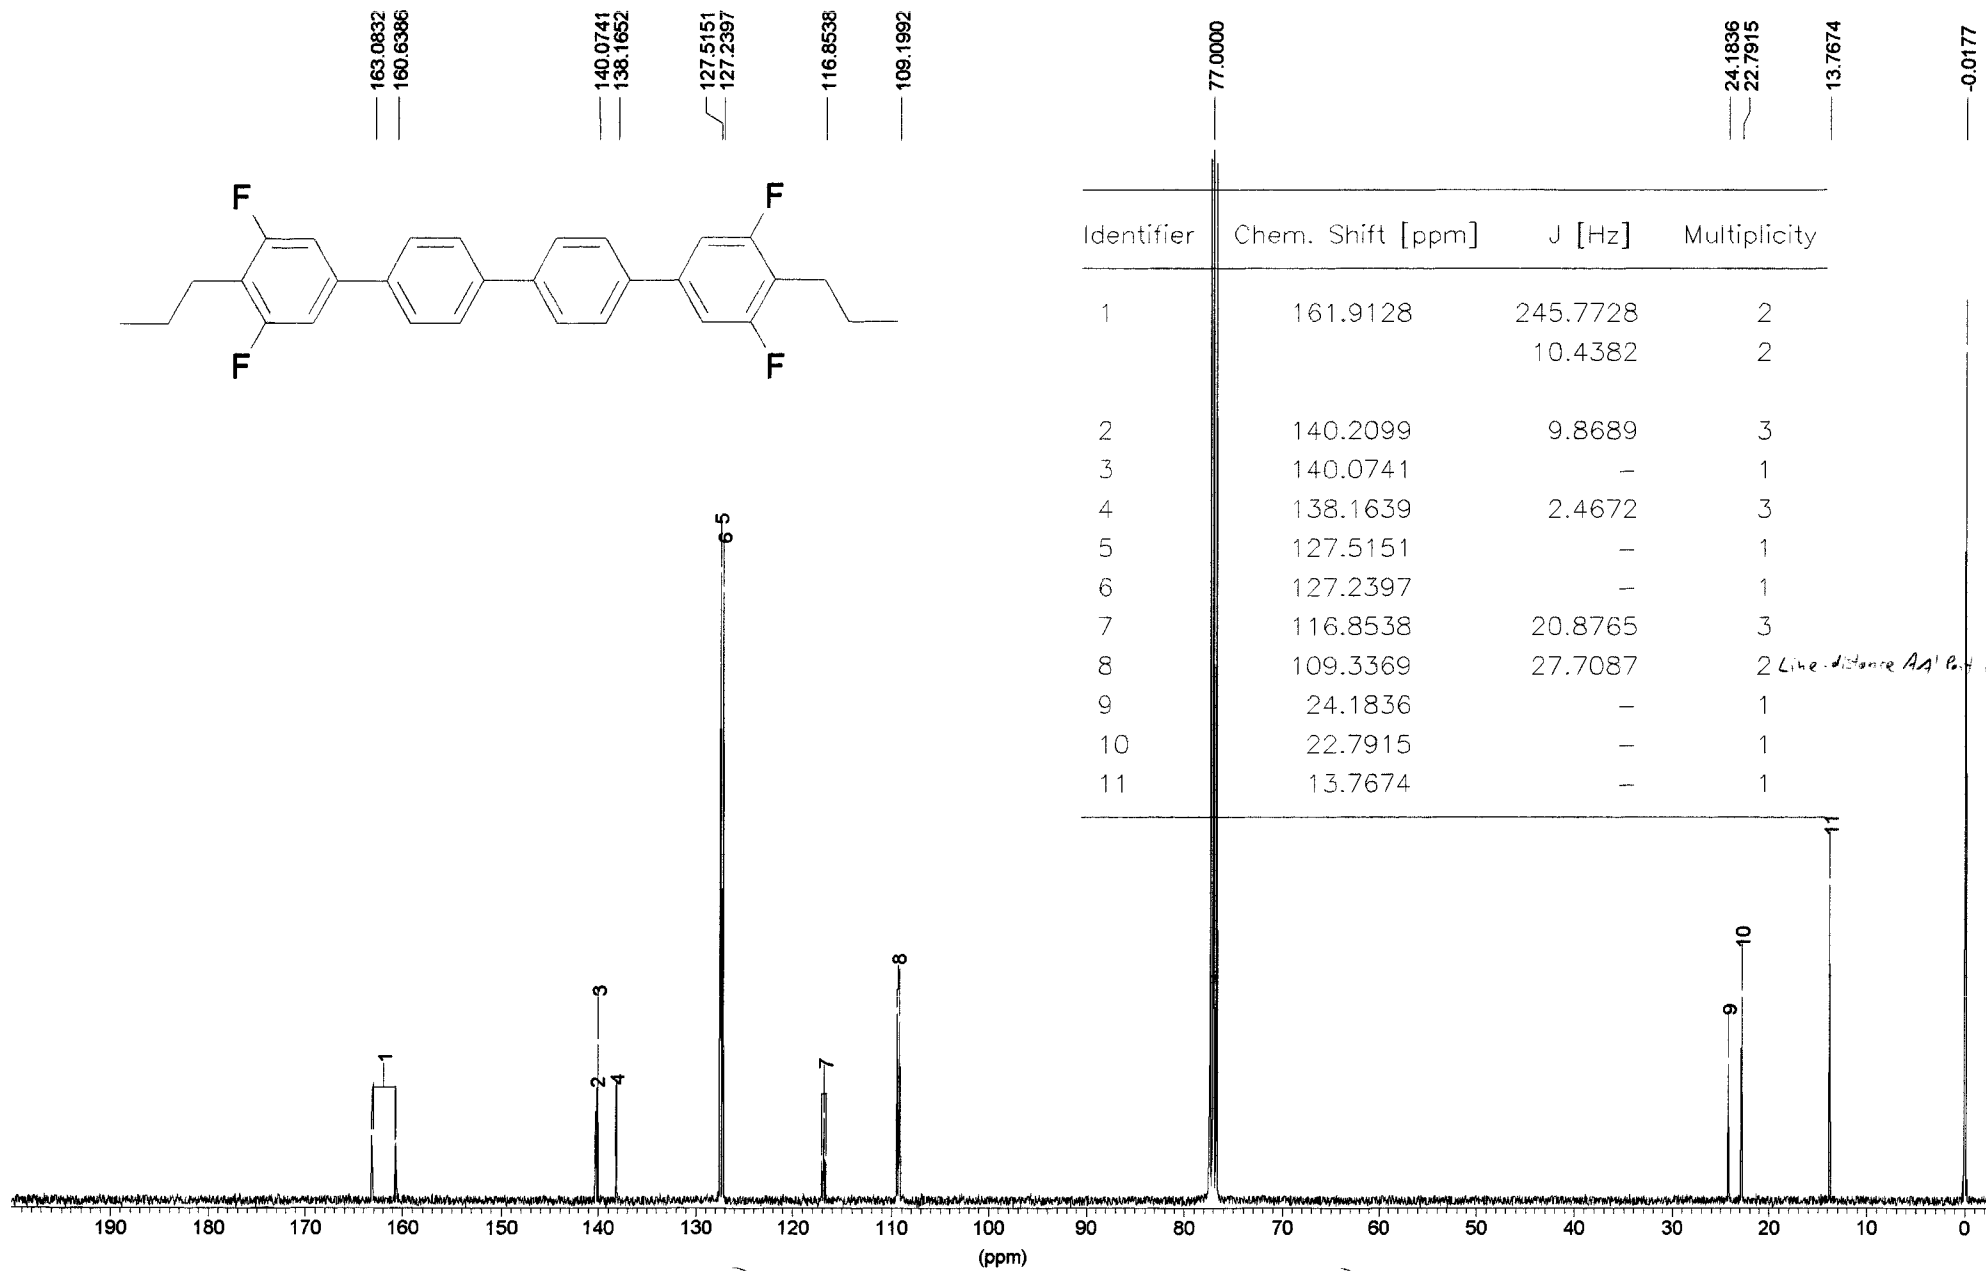

747 400.1 MHz

3,5,2',2'',3'',5''-Hexafluoro-4,4''-dipropyl-[1,1';4',4'';1'',1''']quaterphenyl

7.5340  
7.4002  
7.2600  
7.1460  
7.0949

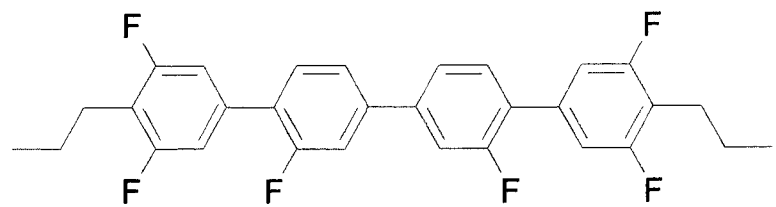

2.7239  
2.7053  
2.6864

2.1743

1.7198  
1.7011  
1.6825  
1.6639  
1.6453  
1.6269  
1.5357

1.0218  
1.0035  
0.9848

0.0094

| Identifier | Chem. Shift [ppm] | J [Hz] | Multiplicity |
|------------|-------------------|--------|--------------|
| 1          | 2.7052            | 7.5157 | 3            |
| 2          | 1.6732            | 7.4273 | 6            |
| 3          | 1.0034            | 7.3894 | 3            |

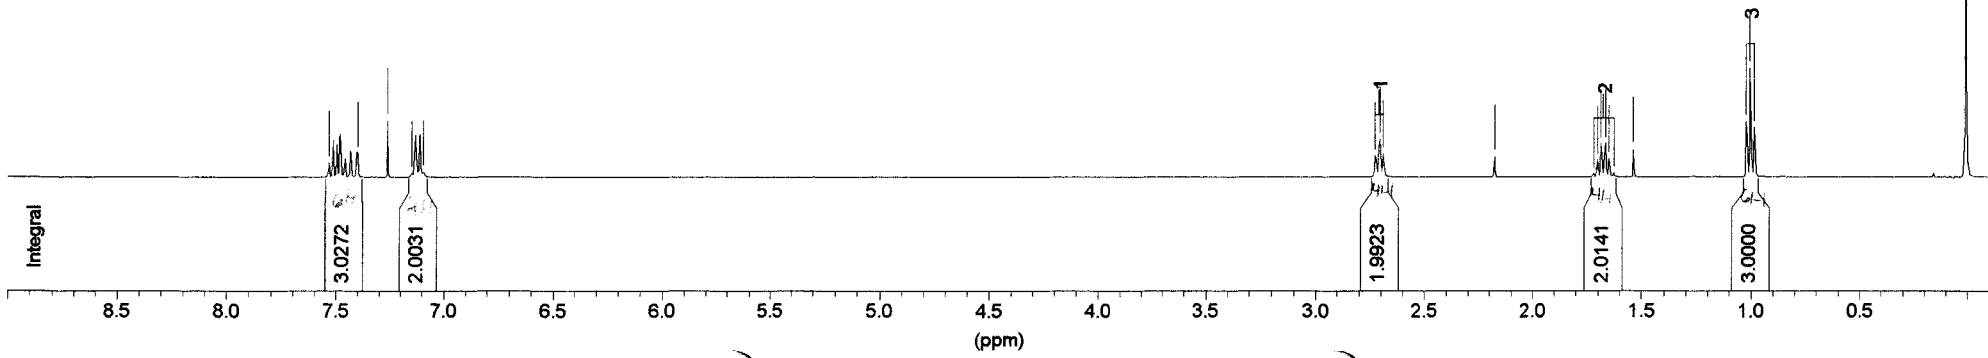



747 100.6 MHz

3,5,2',2'',3''',5'''-Hexafluoro-4,4'''-dipropyl-[1,1':4',4'':1'',1''']quaterphenyl

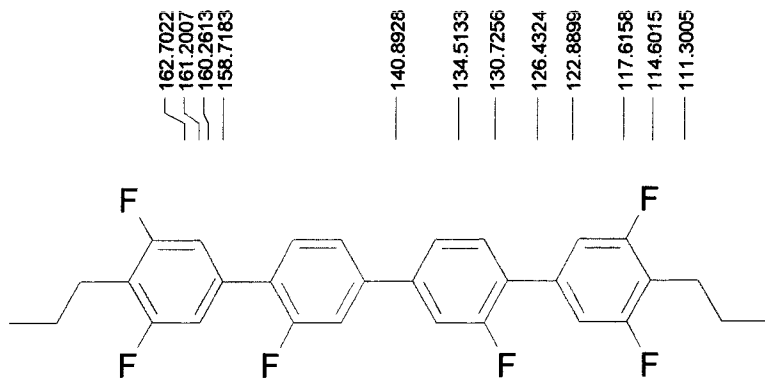

162.7022  
161.2007  
160.2613  
158.7183  
140.8928  
134.5133  
130.7256  
126.4324  
122.8899  
117.6158  
114.6015  
111.3005

| Identifier | Chem. Shift [ppm] | J [Hz]   | Multiplicity |
|------------|-------------------|----------|--------------|
| 1          | 161.5327          | 245.5830 | 2            |
|            |                   | 10.2484  | 2            |
| 2          | 159.9595          | 249.7583 | 2            |
| 3          | 140.9409          | 8.1608   | 2            |
|            |                   | 1.7081   | 2            |
| 4          | 134.5146          | 10.4382  | 3            |
| 5          | 130.7445          | 3.7957   | 2            |
| 6          | 126.4972          | 13.0320  | 2            |
|            |                   | 2.5621   | 3            |
| 7          | 122.9069          | 3.4161   | 2            |
| 8          | 117.6158          | 20.8765  | 3            |
| 9          | 114.7222          | 24.2926  | 2            |
| 10         | 111.4571          | 31.5045  | 2            |
| 11         | 24.2213           | -        | 1            |
| 12         | 22.7500           | -        | 1            |
| 13         | 13.7825           | -        | 1            |

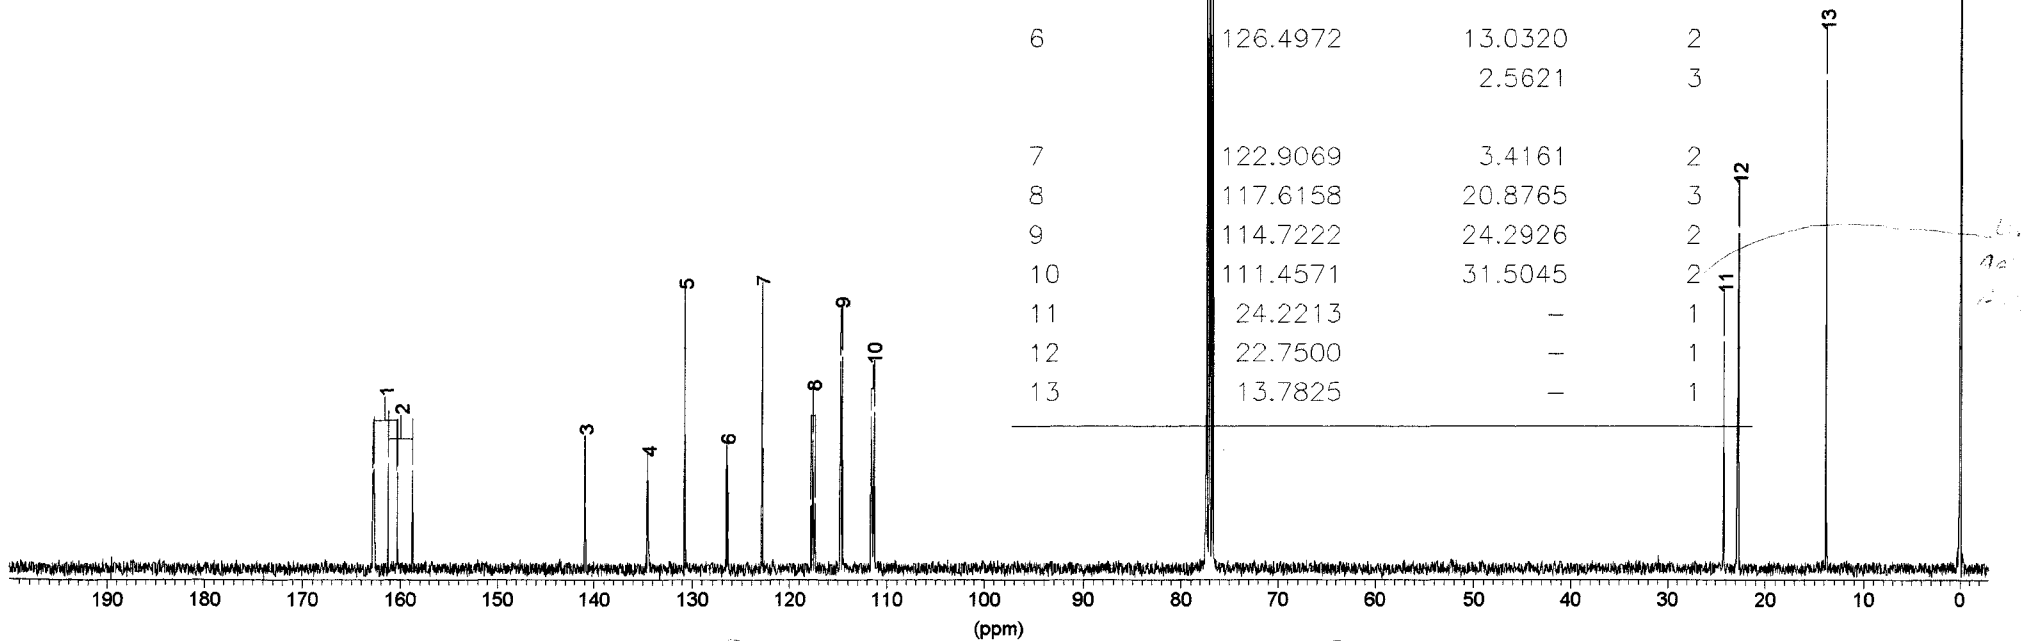

252 400.1 MHz

2'-Fluoro-4,4''-dipropyl-[1,4':1',1''-4'',1''']quaterphenyl

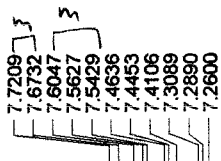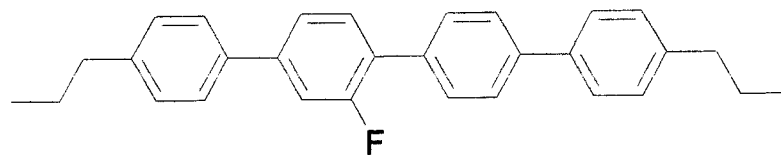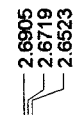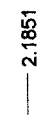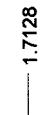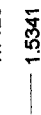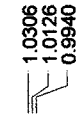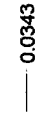

| Identifier | Chem. Shift [ppm] | J [Hz]  | Multiplicit   |
|------------|-------------------|---------|---------------|
| 1          | 7.4758            | 7.9578  | 2             |
|            |                   | 1.7684  | 2             |
| 2          | 7.4280            | 12.1893 | 2             |
|            |                   | 1.7052  | 2             |
| 3          | 7.2990            | 7.9578  | 2 <i>b.t.</i> |
| 4          | 2.6717            | 7.7683  | 3 <i>b.t.</i> |
| 5          | 1.7251            | 7.4526  | 6             |
| 6          | 1.7222            | 7.5283  | 6             |
| 7          | 1.0155            | 7.3262  | 3             |
| 8          | 1.0125            | 7.3894  | 3             |

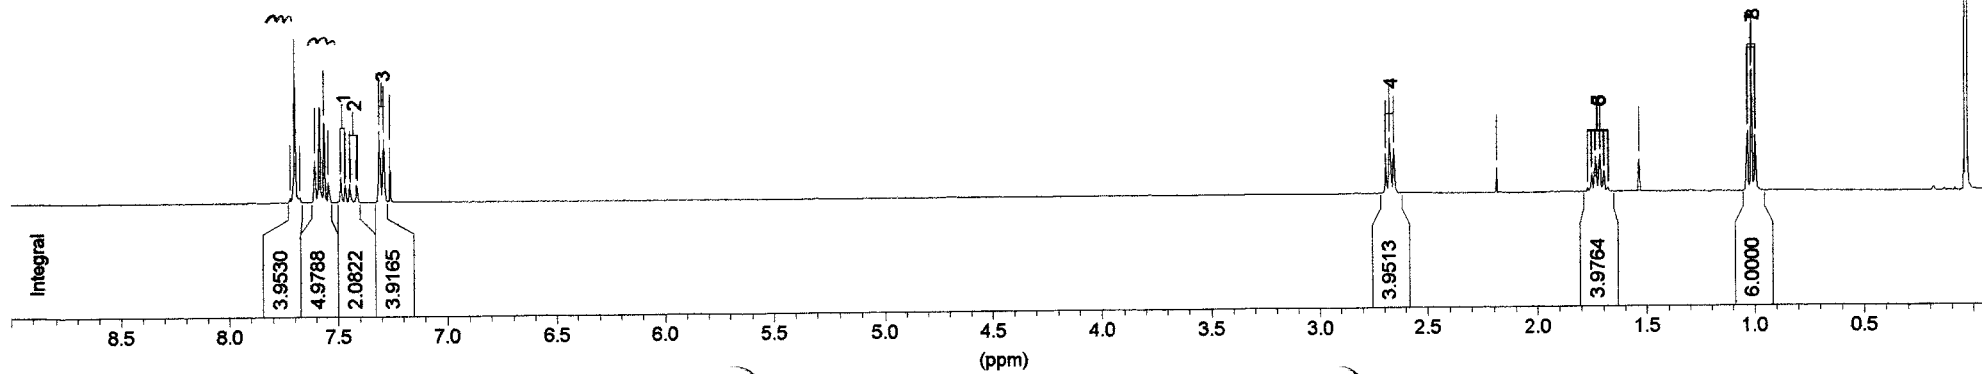

252 100.6 MHz

2'-Fluoro-4,4''-dipropyl-[1,4':1',1'':4'',1''']quaterphenyl

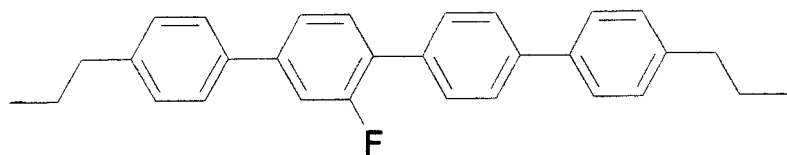

161.3667  
158.9032  
142.5980  
142.0397  
140.4476  
138.0256  
134.2040  
130.7407  
129.0506  
128.9450  
127.0134  
126.9040  
126.7644  
122.7277  
114.2884

77.0000  
37.7235  
37.7121  
24.5307  
24.5005  
13.8844  
13.8542  
-0.0139

| Identifier | Chem. Shift [ppm] | J [Hz]   | Multiplicity |
|------------|-------------------|----------|--------------|
| 1          | 160.1349          | 247.8604 | 2            |
| 2          | 142.5980          | -        | 1            |
| 3          | 142.2792          | 7.9710   | 2            |
| 4          | 142.0397          | -        | 1            |
| 5          | 140.4476          | -        | 1            |
| 6          | 138.0256          | -        | 1            |
| 7          | 136.8693          | 1.8979   | 2            |
| 8          | 134.2096          | 1.1387   | 2            |
| 9          | 130.7615          | 4.1753   | 2            |
| 10         | 129.2543          | 3.0366   | 2            |
| 11         | 129.0506          | -        | 1            |
| 12         | 128.9450          | -        | 1            |
| 13         | 127.0190          | 13.2850  | 2            |
| 14         | 127.0134          | -        | 1            |
| 15         | 126.9040          | -        | 1            |
| 16         | 126.7644          | -        | 1            |
| 17         | 122.7428          | 3.0366   | 2            |
| 18         | 114.4053          | 23.5335  | 2            |
| 19         | 37.7235           | -        | 1            |
| 20         | 37.7121           | -        | 1            |
| 21         | 24.5307           | -        | 1            |
| 22         | 24.5005           | -        | 1            |
| 23         | 13.8844           | -        | 1            |
| 24         | 13.8542           | -        | 1            |

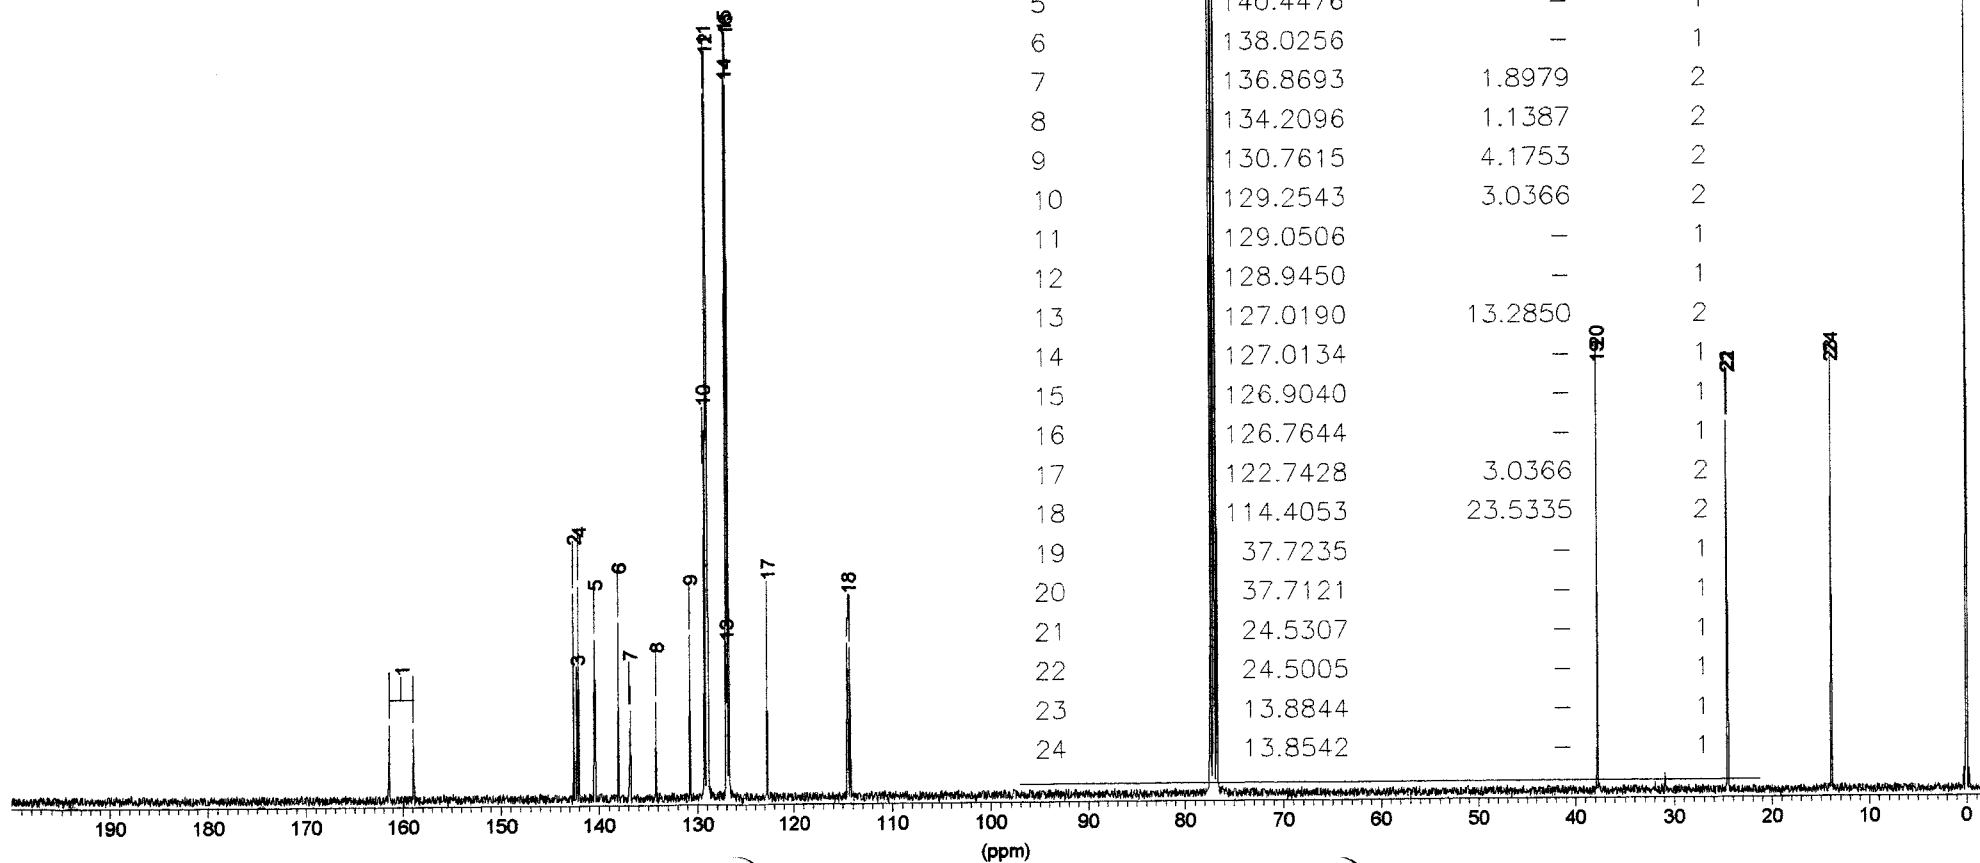

752 400.1 MHz

3,5,2-Trifluoro-4,4"-dipropyl-[1,4':1",1":4",1''']quaterphenyl

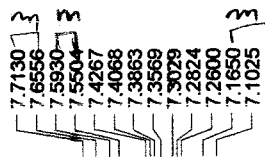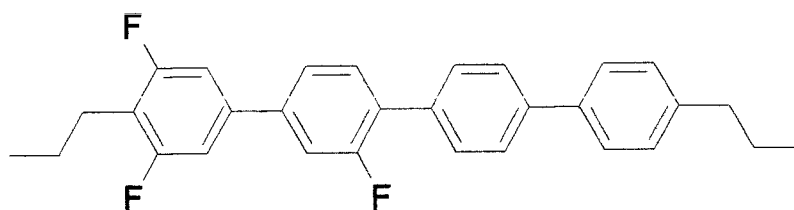

2.7104  
2.6646

2.1810

1.7074  
1.5363

1.0073

0.0248

| Identifier | Chem. Shift [ppm] | J [Hz]  | Multiplicity   |
|------------|-------------------|---------|----------------|
| 1          | 7.4190            | 8.0210  | 2              |
|            |                   | 1.8316  | 2              |
| 2          | 7.3695            | 11.8104 | 2              |
|            |                   | 1.7052  | 2              |
| 3          | 7.2927            | 8.2104  | 2 <i>b. d.</i> |
| 4          | 2.7103            | 7.5157  | 3              |
| 5          | 2.6645            | 7.7683  | 3              |
| 6          | 1.7169            | 7.5283  | 6              |
| 7          | 1.6803            | 7.1241  | 6              |
| 8          | 1.0109            | 7.3894  | 3              |
| 9          | 1.0073            | 7.3262  | 3              |

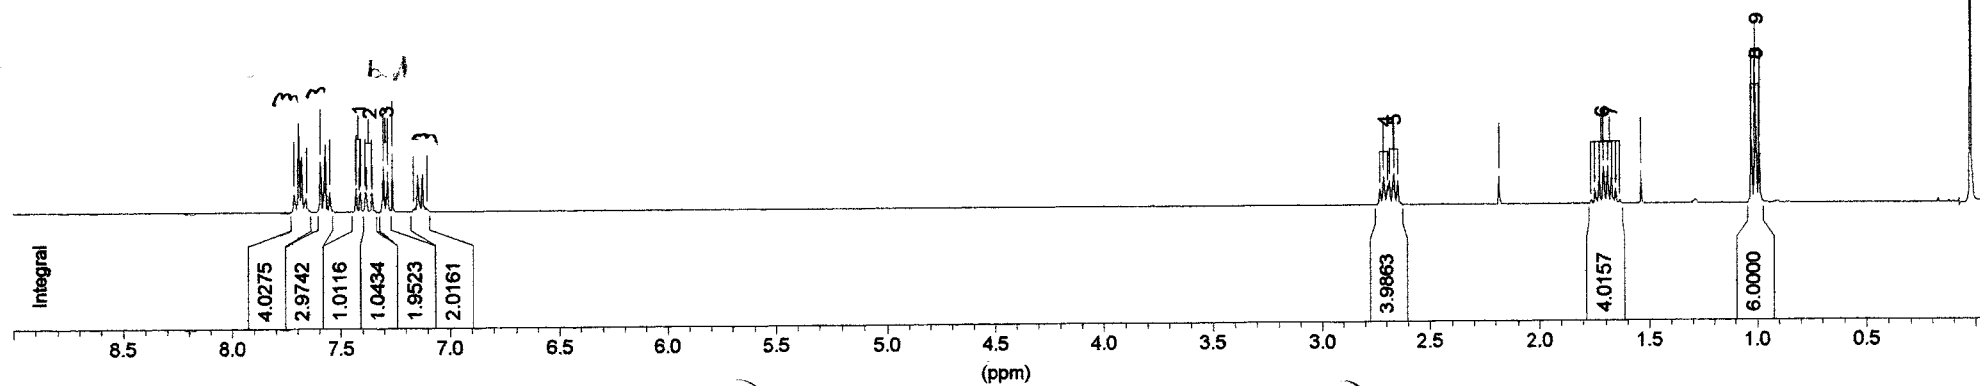

752 100.6 MHz

3,5,2'-Trifluoro-4,4''-dipropyl-[1,4':1',1'':4'',1''']quaterphenyl

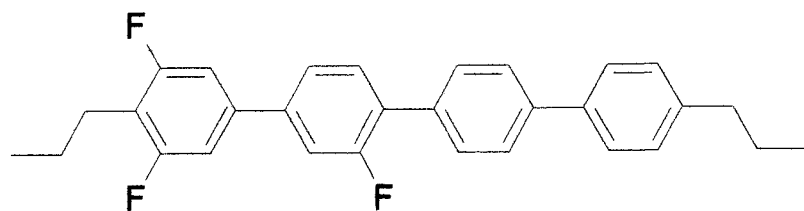

163.0983  
161.3554  
160.6499  
158.8881

142.1491  
140.7381  
139.8855  
139.0819  
137.9200  
133.7739  
131.0161  
129.2354  
128.9714  
128.1904  
127.0700  
126.9115  
122.5919

117.4272  
114.3148  
109.2256

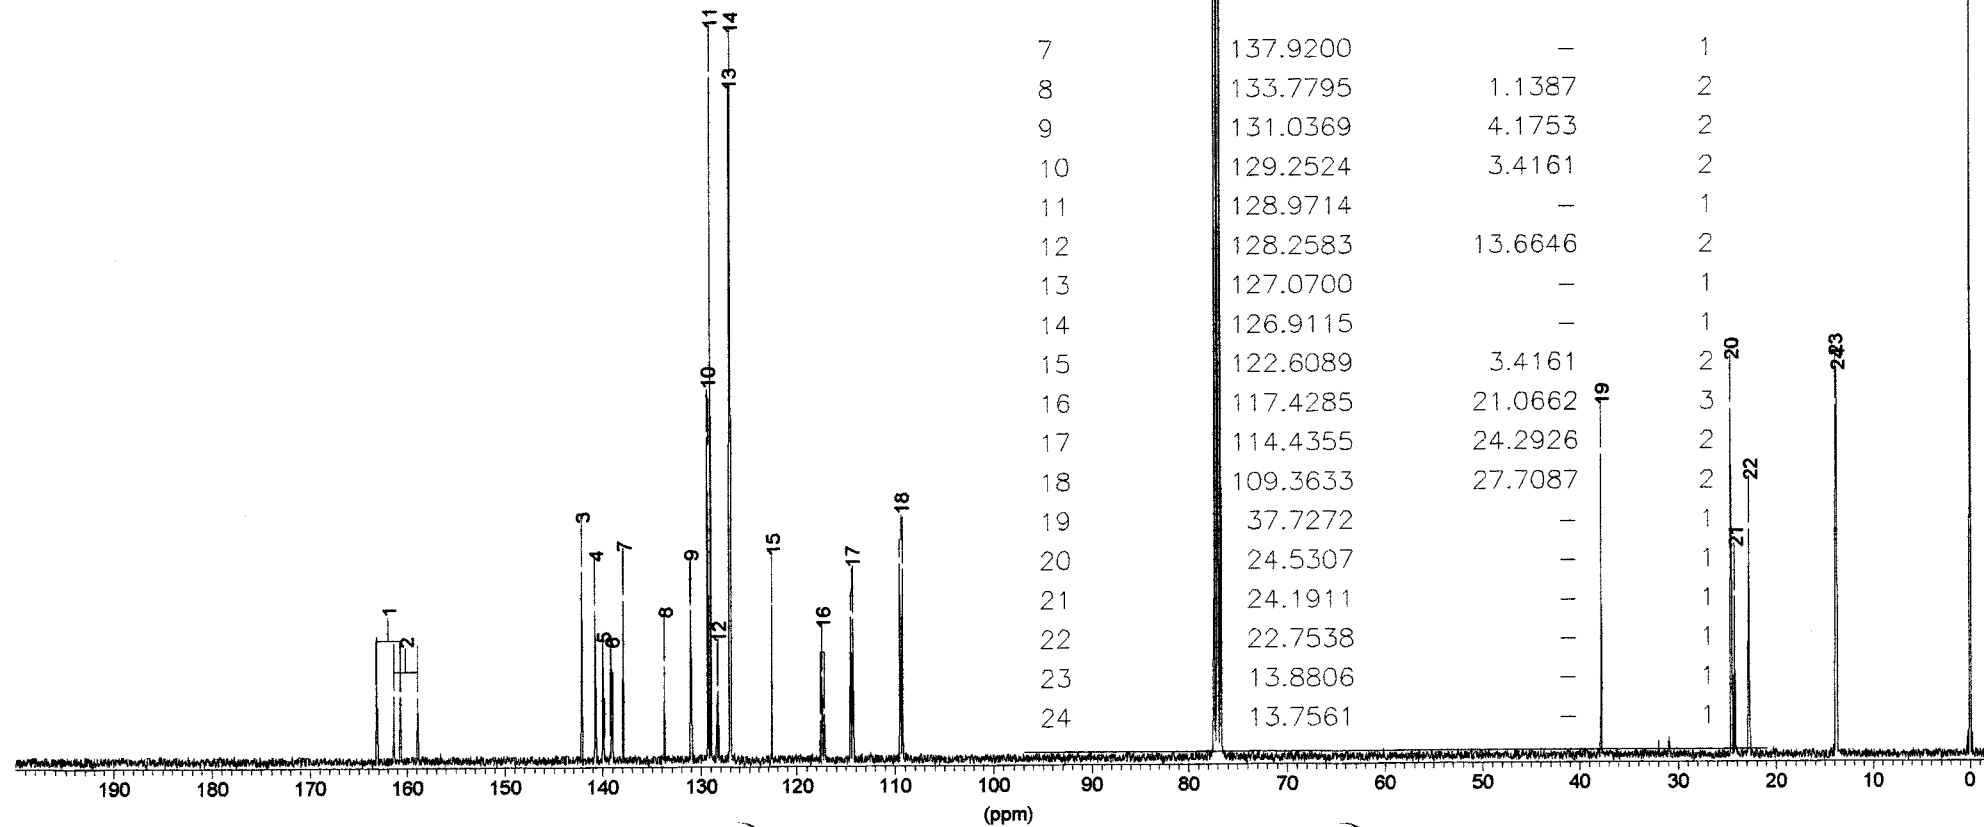

| Identifier | Chem. Shift [ppm] | J [Hz] | Multiplicity |
|------------|-------------------|--------|--------------|
|------------|-------------------|--------|--------------|

|    |          |          |   |
|----|----------|----------|---|
| 1  | 161.9250 | 246.3421 | 2 |
| 2  | 160.1217 | 248.2400 | 2 |
| 3  | 142.1491 | -        | 1 |
| 4  | 140.7381 | -        | 1 |
| 5  | 139.9239 | 7.9710   | 2 |
| 6  | 139.0920 | 2.4672   | 3 |
| 7  | 137.9200 | -        | 1 |
| 8  | 133.7795 | 1.1387   | 2 |
| 9  | 131.0369 | 4.1753   | 2 |
| 10 | 129.2524 | 3.4161   | 2 |
| 11 | 128.9714 | -        | 1 |
| 12 | 128.2583 | 13.6646  | 2 |
| 13 | 127.0700 | -        | 1 |
| 14 | 126.9115 | -        | 1 |
| 15 | 122.6089 | 3.4161   | 2 |
| 16 | 117.4285 | 21.0662  | 3 |
| 17 | 114.4355 | 24.2926  | 2 |
| 18 | 109.3633 | 27.7087  | 2 |
| 19 | 37.7272  | -        | 1 |
| 20 | 24.5307  | -        | 1 |
| 21 | 24.1911  | -        | 1 |
| 22 | 22.7538  | -        | 1 |
| 23 | 13.8806  | -        | 1 |
| 24 | 13.7561  | -        | 1 |

267 400.1 MHz

3,5,2',2''-Tetrafluoro-4,4'''-dipropyl-[1,1':4',1'':4'',1''']quaterphenyl

7.5662  
7.4049  
7.3067  
7.2862  
7.2600  
7.1599  
7.1113

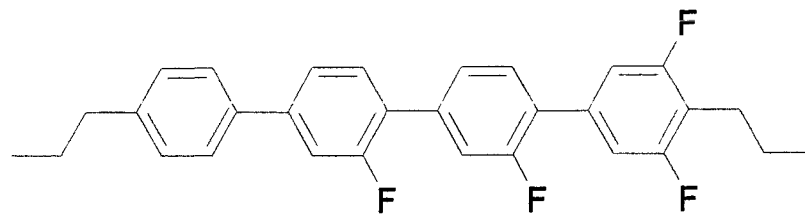

2.7148  
2.6643

1.7018  
1.6848  
1.5335

1.0151  
1.0016

0.0217

| Identifier | Chem. Shift [ppm] | J [Hz] | Multiplicity |
|------------|-------------------|--------|--------------|
| 1          | 7.2965            | 8.2104 | 2 <i>br</i>  |
| 2          | 2.7148            | 7.5789 | 3            |
| 3          | 2.6641            | 7.7052 | 3            |
| 4          | 1.7113            | 7.5283 | 6            |
| 5          | 1.6853            | 7.5283 | 6            |
| 6          | 1.0151            | 7.3262 | 3            |
| 7          | 1.0016            | 7.3262 | 3            |

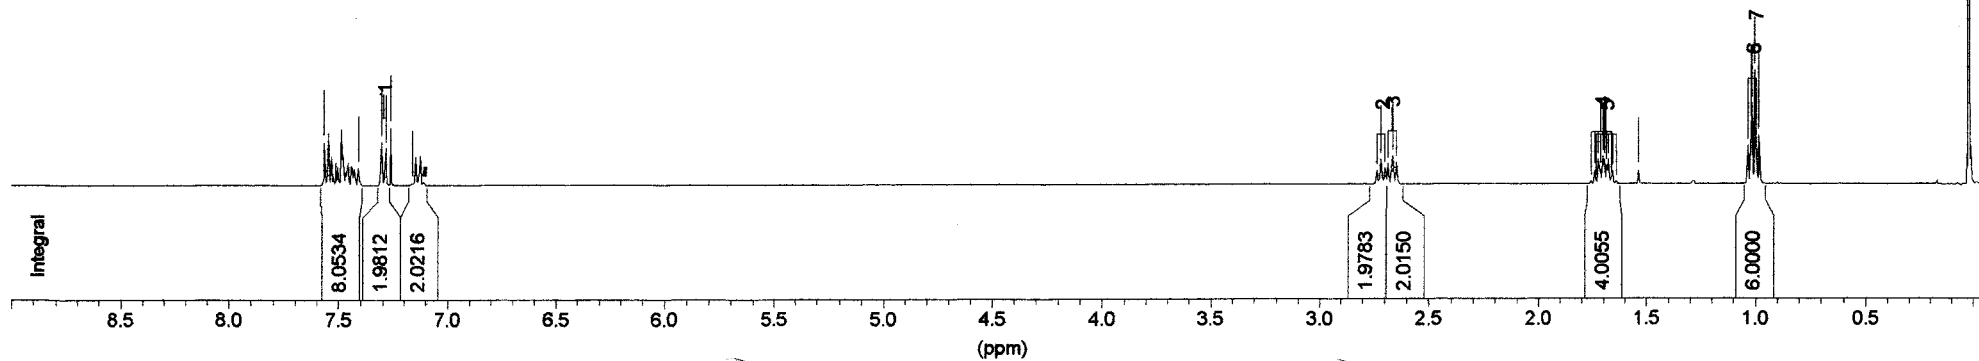

267 100.6 MHz

3,5,2,2'-Tetrafluoro-4,4"-dipropyl-[1,1':4',1":4",1""]quaterphenyl

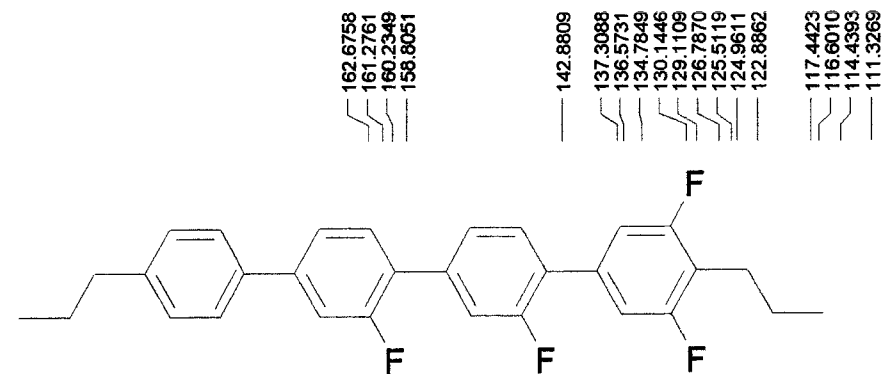

| Identifier | Chem. Shift [ppm] | J [Hz]   | Multiplicity |
|------------|-------------------|----------|--------------|
| 1          | 161.5082          | 245.5830 | 2            |
|            |                   | 10.6280  | 2            |
| 2          | 160.0406          | 248.6196 | 2            |
| 3          | 159.5294          | 248.9991 | 2            |
| 4          | 143.1582          | 7.9710   | 2            |
| 5          | 142.8809          | -        | 1            |
| 6          | 137.3597          | 8.7302   | 2            |
| 7          | 136.5826          | 1.8979   | 2            |
| 8          | 134.7862          | 10.0587  | 3            |
| 9          | 130.5351          | 3.4161   | 2            |
| 10         | 130.1616          | 3.4161   | 2            |
| 11         | 129.1109          | -        | 1            |
| 12         | 126.7870          | -        | 1            |
| 13         | 126.0250          | 12.9054  | 2            |
| 14         | 125.4562          | 13.0952  | 2            |
|            |                   | 1.7081   | 2            |
| 15         | 124.9598          | 3.2264   | 3            |
| 16         | 122.9031          | 3.4161   | 2            |
| 17         | 117.4423          | 20.8765  | 3            |
| 18         | 116.7396          | 24.1028  | 2            |
|            |                   | 3.6059   | 2            |
| 19         | 114.5562          | 23.5335  | 2            |
| 20         | 111.4986          | 27.7087  | 2            |
| 21         | 37.7121           | -        | 1            |
| 22         | 24.4929           | -        | 1            |
| 23         | 24.2175           | -        | 1            |
| 24         | 22.7575           | -        | 1            |
| 25         | 13.8429           | -        | 1            |
| 26         | 13.7938           | -        | 1            |

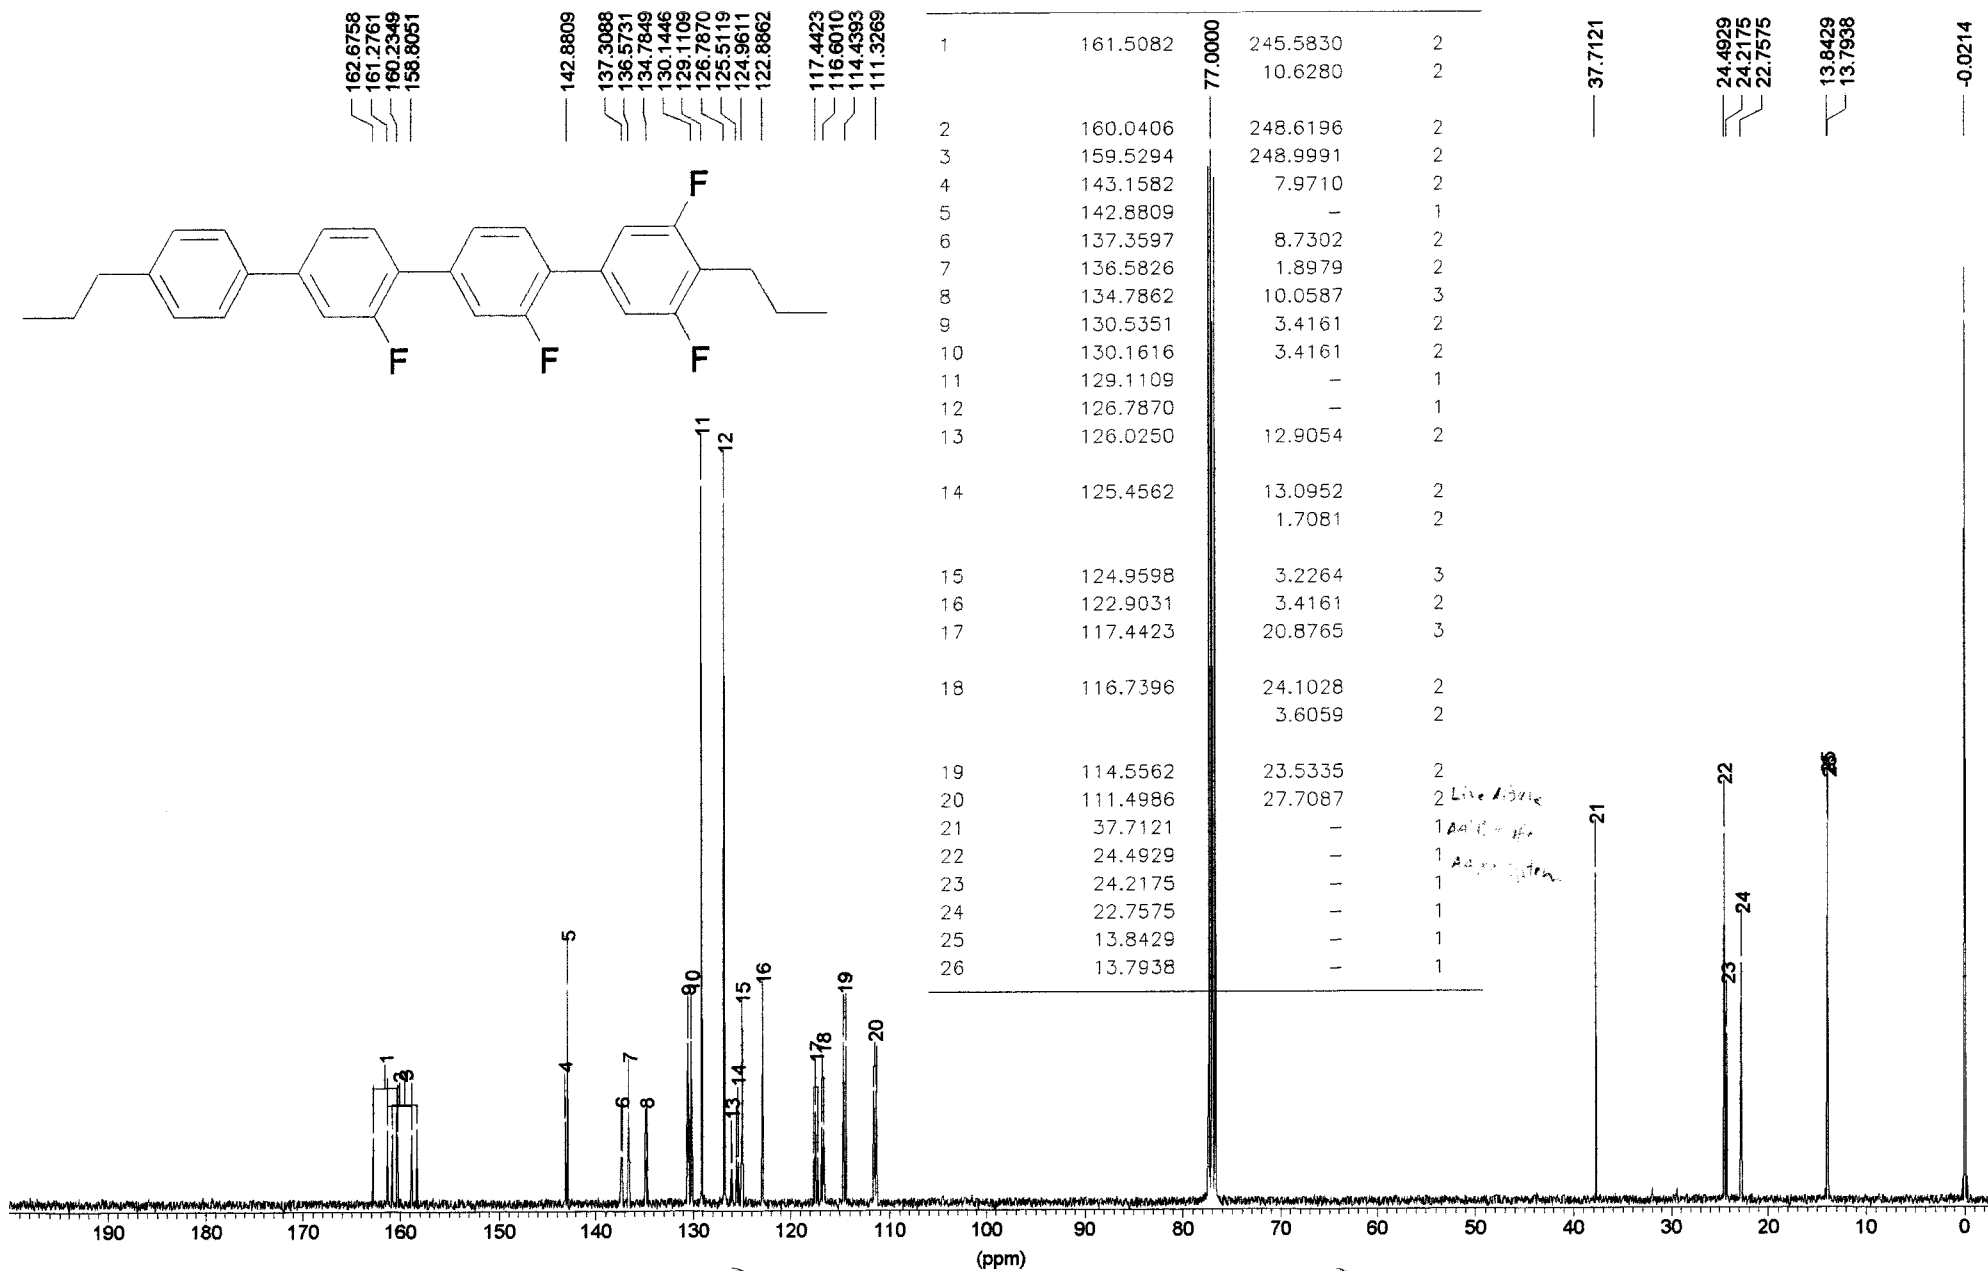

361 400.1 MHz

3,2',2'',2'''-Tetrafluoro-4,4''-dipropyl-[1,1';4',1'';4''',1''']quaterphenyl

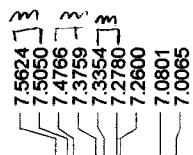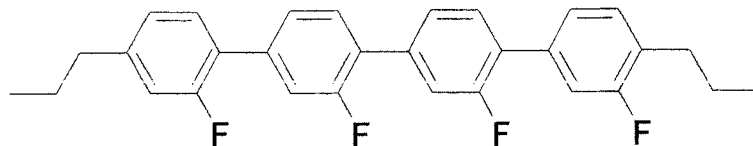

2.6700

1.6986

1.5322

1.0006

0.0204

| Identifier | Chem. Shift [ppm] | J [Hz]  | Multiplicity   |
|------------|-------------------|---------|----------------|
| 1          | 7.0675            | 7.8947  | 2              |
|            |                   | 1.5789  | 2              |
| 2          | 7.0233            | 11.9367 | 2              |
|            |                   | 1.4526  | 2              |
| 3          | 2.6893            | 7.7052  | 3              |
| 4          | 2.6512            | 7.7683  | 3              |
| 5          | 1.7083            | 7.4526  | 6 <i>b. se</i> |
| 6          | 1.0159            | 7.2631  | 3              |
| 7          | 1.0004            | 7.1999  | 3              |

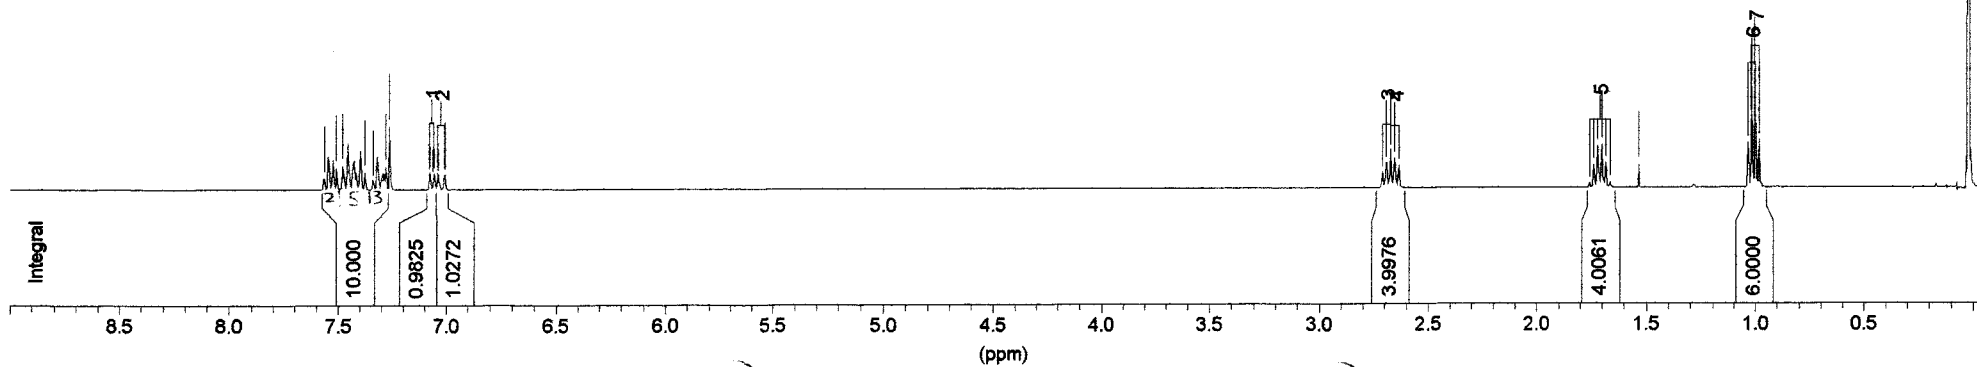



361 100.6 MHz

3,2',2'',2'''-Tetrafluoro-4,4''-dipropyl-[1,1';4',1'';4'',1''']quaterphenyl

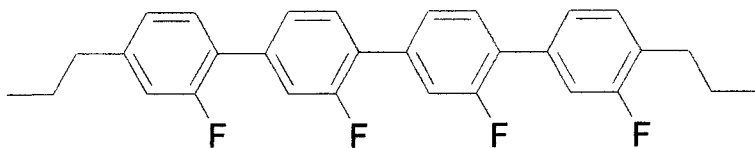

162.2985  
160.8310  
159.8690  
158.3637  
145.2841  
137.5993  
136.6448  
134.7019  
130.3861  
129.9824  
128.9374  
127.0285  
126.0853  
124.9045  
124.6744  
124.3424  
116.5670  
116.2615  
115.7748

| Identifier | Chem. Shift [ppm] | J [Hz]                      | Multiplicity |
|------------|-------------------|-----------------------------|--------------|
| 1          | 161.0937          | 244.4443                    | 2            |
| 2          | 159.6143          | 248.6196                    | 2            |
| 3          | 159.2356          | 248.2400                    | 2            |
| 4          | 159.6333          | 248.2400                    | 2            |
| 5          | 145.3218          | 7.5914                      | 2            |
| 6          | 137.6474          | 8.5404<br>0.9489            | 2<br>2       |
| 7          | 136.6929          | 8.5404<br>0.9489            | 2<br>2       |
| 8          | 134.7491          | 8.3506<br>1.1387            | 2<br>2       |
| 9          | 130.6860          | 5.6936                      | 2            |
| 10         | 130.4049          | 3.7957                      | 2            |
| 11         | 130.2257          | 3.4161                      | 2            |
| 12         | 129.9994          | 3.4161                      | 2            |
| 13         | 129.0185          | 16.3216                     | 2            |
| 14         | 127.1039          | 13.2850<br>1.8979           | 2<br>2       |
| 15         | 126.1589          | 12.9054<br>1.8979           | 2<br>2       |
| 16         | 124.9586          | 3.2264                      | 3            |
| 17         | 124.9032          | 3.2264                      | 3            |
| 18         | 124.6895          | 3.0366                      | 2            |
| 19         | 124.4801          | 1.8979                      | 2            |
| 20         | 124.3424          | -                           | 1            |
| 21         | 124.3405          | 6.4527                      | 2            |
| 22         | 116.6934          | 23.9130<br>3.4161<br>1.8979 | 2<br>2<br>2  |
| 23         | 116.1502          | 22.3947                     | 2            |
| 24         | 115.6729          | 23.9130<br>3.4161           | 2<br>2       |
| 25         | 37.5009           | -                           | 1            |
| 26         | 30.8649           | -                           | 1            |
| 27         | 24.1874           | -                           | 1            |
| 28         | 23.2932           | -                           | 1            |
| 29         | 13.8580           | -                           | 1            |
| 30         | 13.7372           | -                           | 1            |

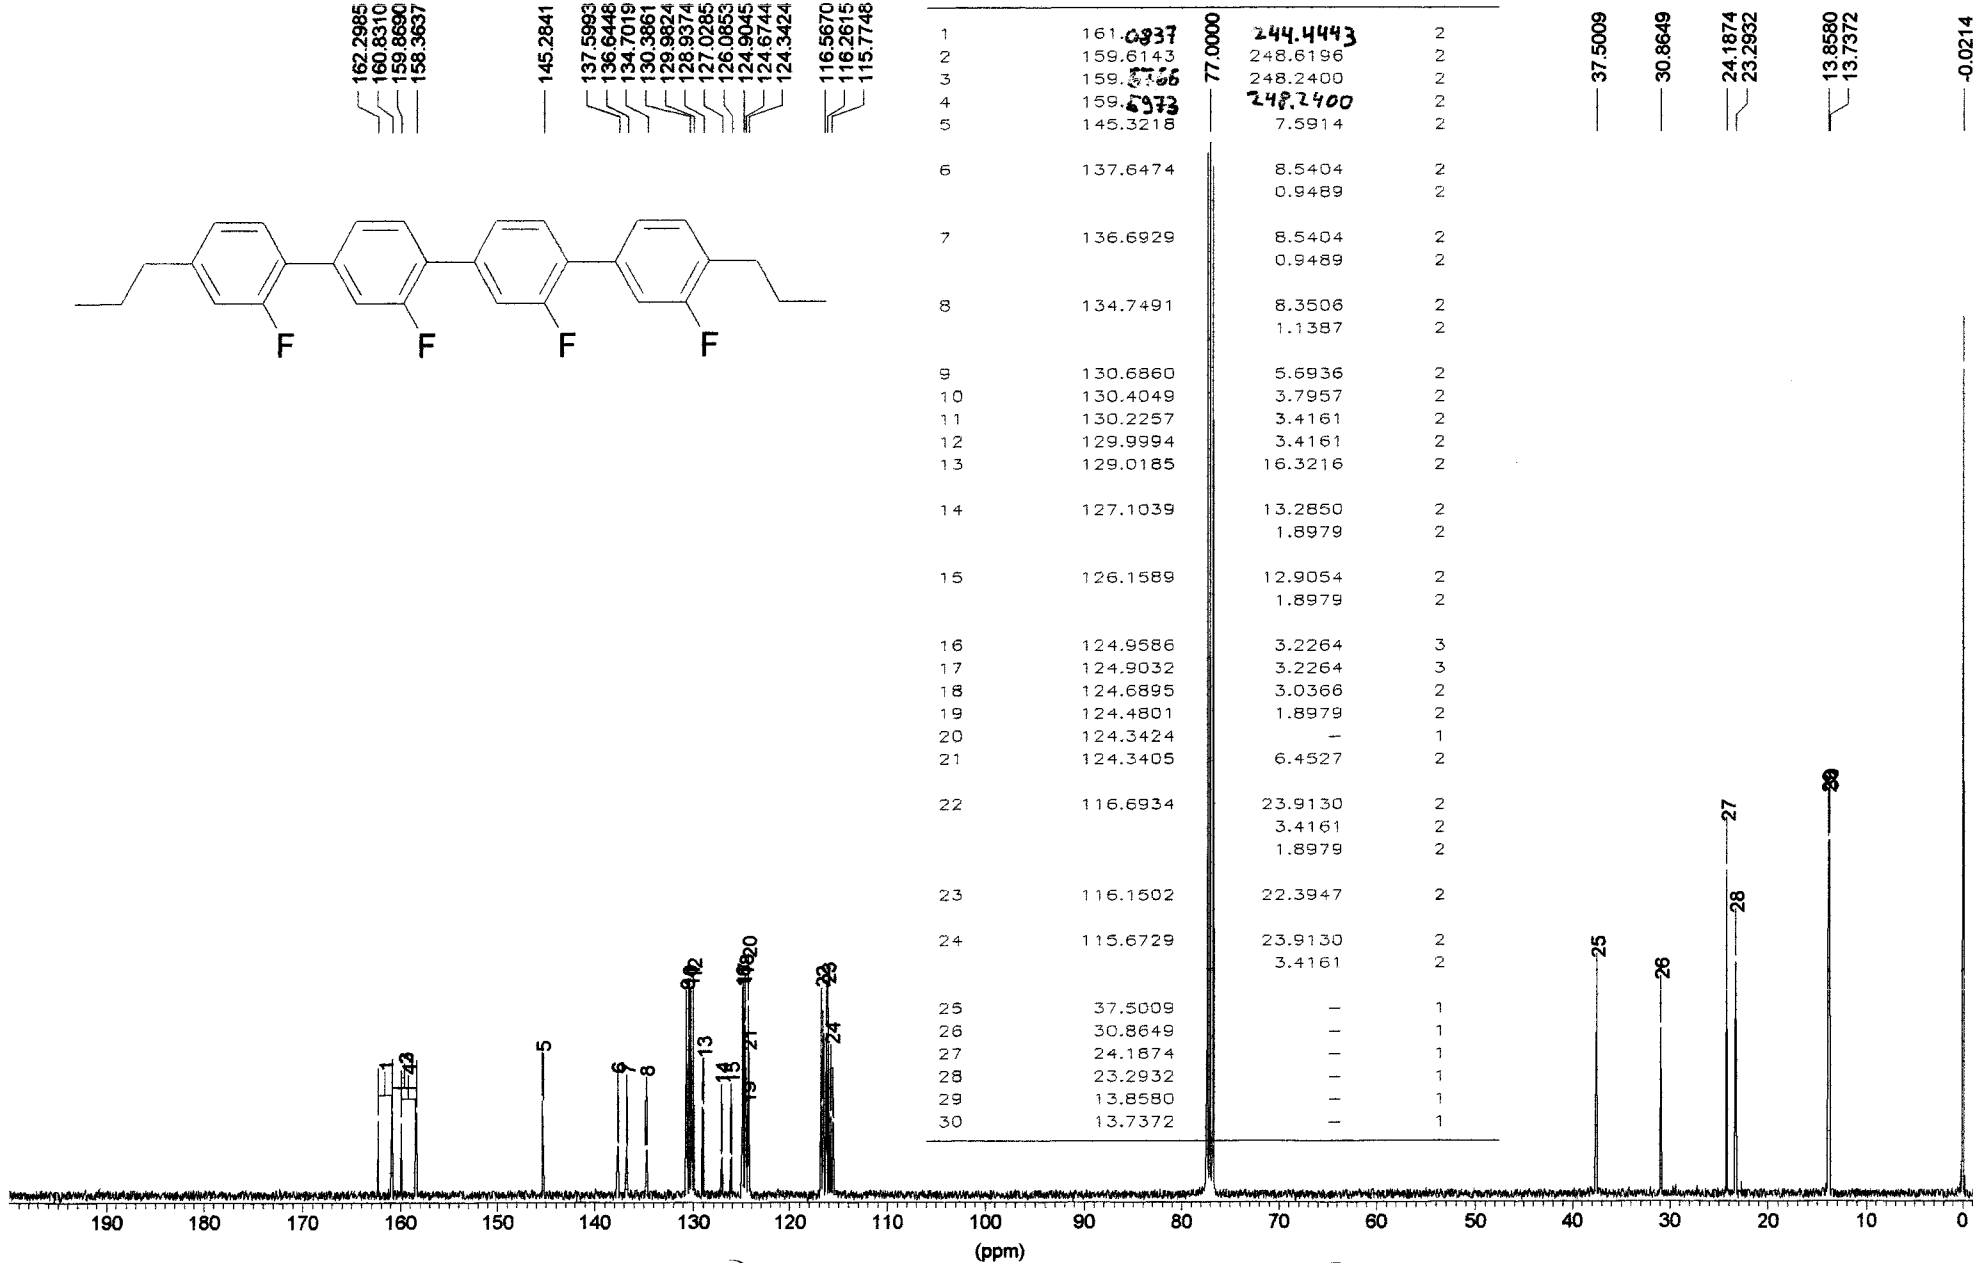

272 400.1 MHz 2'-Fluoro-4,4''-dipropyl-[1,1':4',4'':1'',1''']quaterphenyl

7.7048  
7.6006  
7.4396  
7.3143  
7.2909  
7.2600

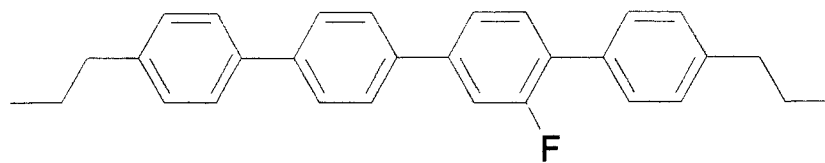

2.6747

1.7201  
1.7163  
1.5310

1.0199  
1.0164

0.0362

| Identifier | Chem. Shift [ppm] | J [Hz] | Multiplicity   |
|------------|-------------------|--------|----------------|
| 1          | 2.6746            | 7.6420 | 3 <i>bv. +</i> |
| 2          | 1.7296            | 7.4526 | 6              |
| 3          | 1.7258            | 7.5283 | 6              |
| 4          | 1.0199            | 7.3262 | 3              |
| 5          | 1.0163            | 7.3894 | 3              |

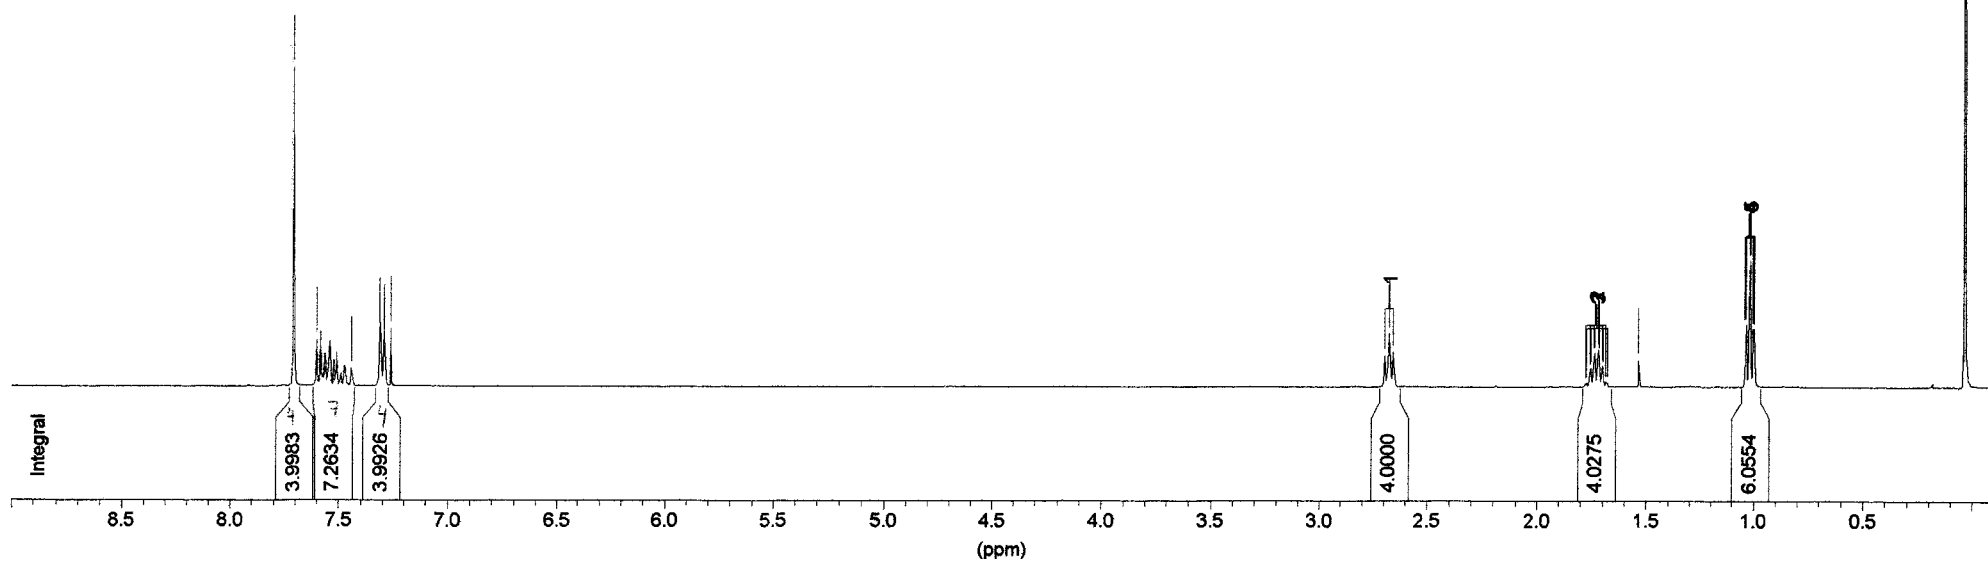

272 160.6 MHz 2-Fluoro-4,4'-dipropyl-[1,1':4',4'':1'',1''']quaterphenyl

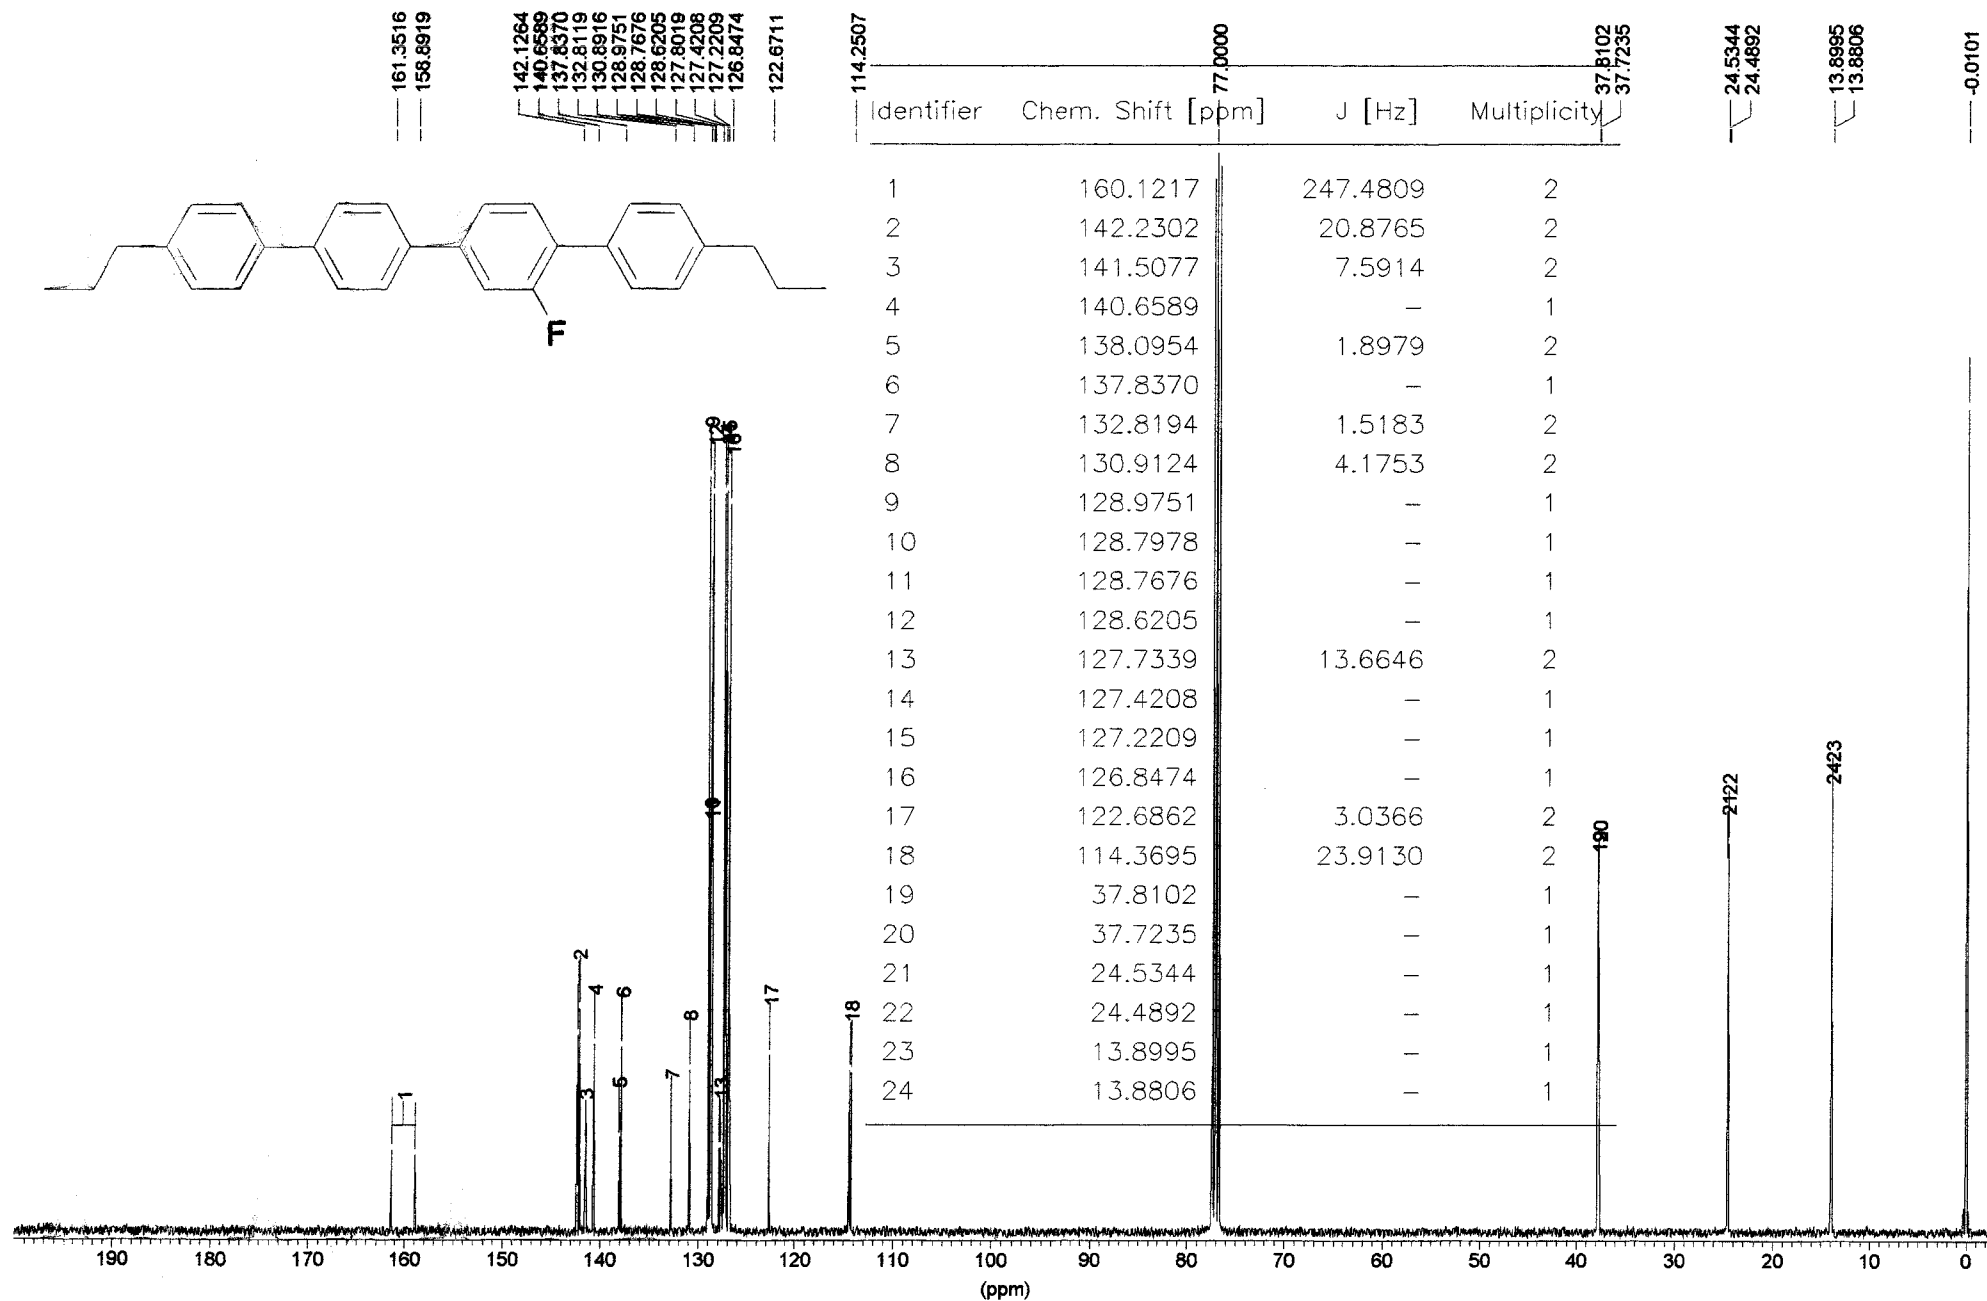

7.7177  
7.6376  
7.5457  
7.4288  
7.3386  
7.2777  
7.2600  
7.1666  
7.0245

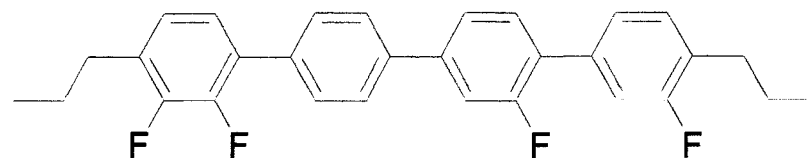

2.7101  
2.6911

1.7027  
1.5354

1.0196

0.0255

| Identifier | Chem. Shift [ppm] | J [Hz] | Multiplicity |
|------------|-------------------|--------|--------------|
| 1          | 7.1664            | 8.1789 | 2            |
|            |                   | 6.8526 | 2            |
|            |                   | 1.5474 | 2            |
| 2          | 7.0246            | 8.0525 | 2            |
|            |                   | 6.7262 | 2            |
|            |                   | 1.4210 | 2            |
| 3          | 2.7098            | 7.1999 | 3            |
| 4          | 2.6912            | 7.5157 | 3            |
| 5          | 1.7154            | 7.4526 | 6            |
| 6          | 1.7121            | 7.5283 | 6            |
| 7          | 1.0195            | 7.3894 | 3 b, t.      |

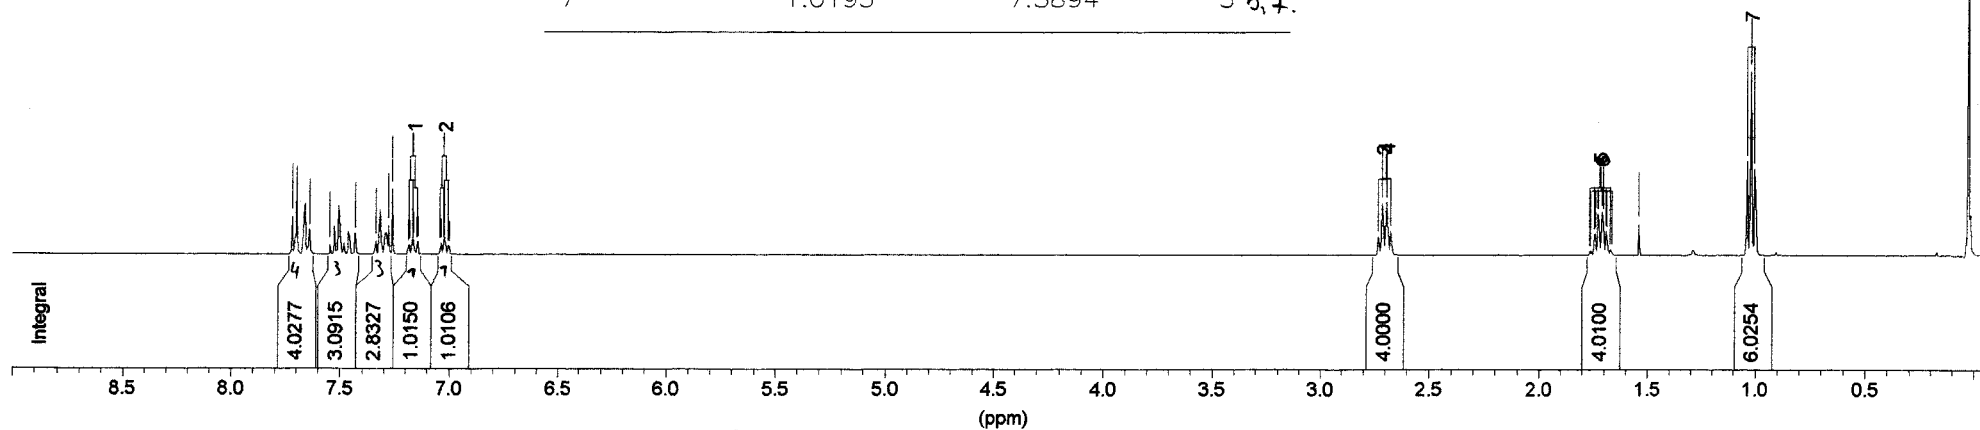

871 100.6 MHz 2,3,2',3''-Tetrafluoro-4,4''-dipropyl-[1,1':4',4'':1'',1''']quaterphenyl

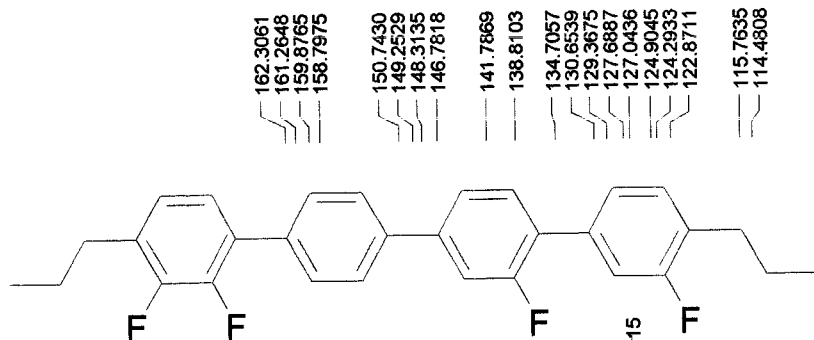

- 162.3061
- 161.2648
- 159.8765
- 158.7975
- 150.7430
- 149.2529
- 148.3135
- 146.7818
- 141.7869
- 138.8103
- 134.7057
- 130.8539
- 129.3675
- 127.6887
- 127.0436
- 124.9045
- 124.2933
- 122.8711
- 115.7635
- 114.4808

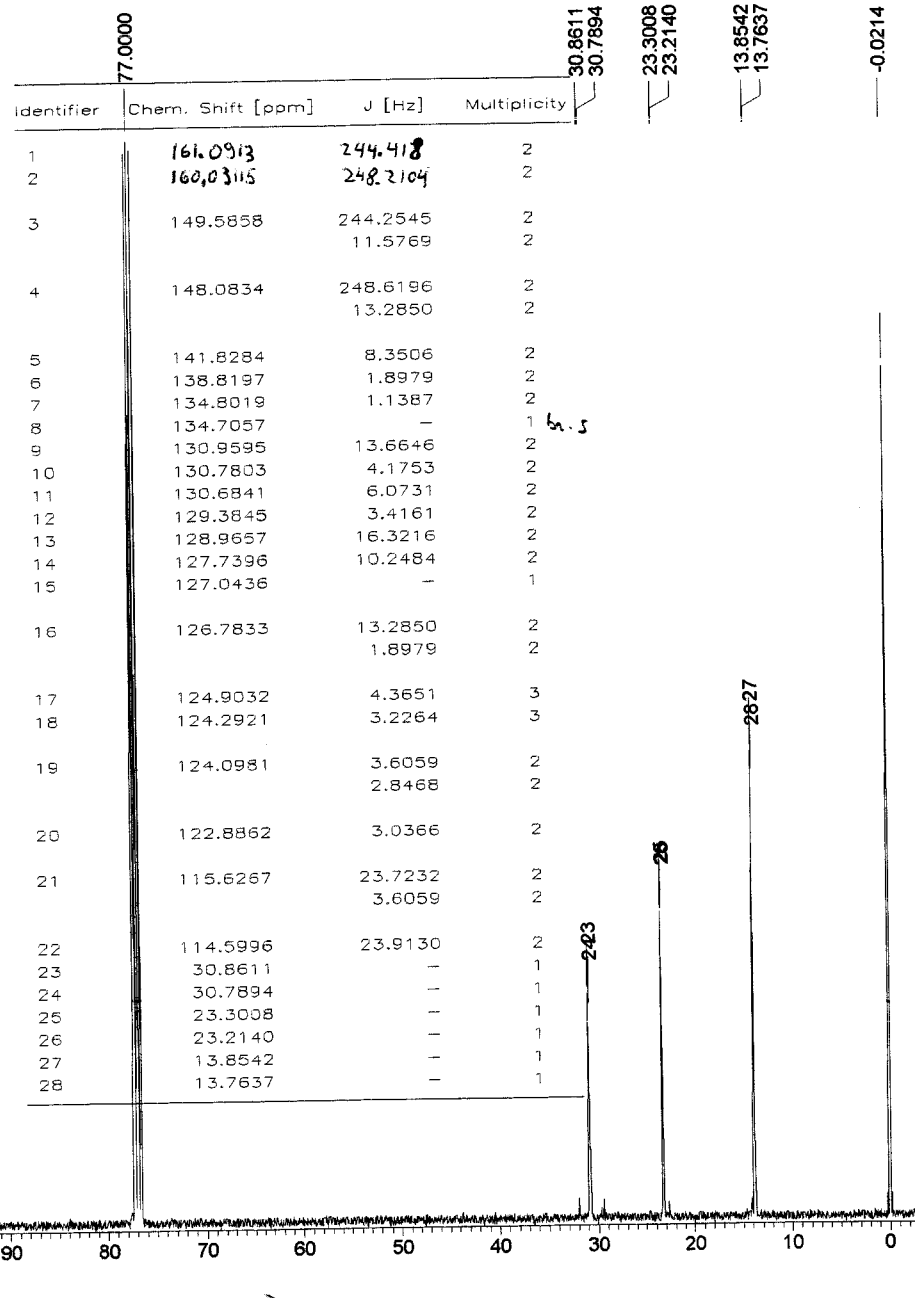

1-8-2 400.6 MHz

3,2',2'',3''-Tetrafluoro-4,4''-dipropyl-[1,1':4',1'':4'',1''']quaterphenyl

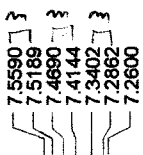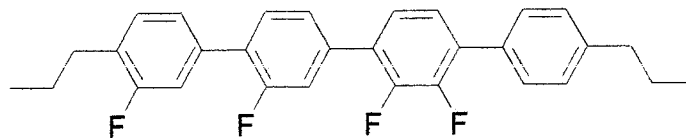

2.6722

1.7011

1.5322

1.0073

0.0204

| Identifier | Chem. Shift [ppm] | J [Hz] | Multiplicity |
|------------|-------------------|--------|--------------|
| 1          | 2.6907            | 7.5789 | 3            |
| 2          | 2.6721            | 7.8947 | 3            |
| 3          | 1.7189            | 7.5283 | 6            |
| 4          | 1.7106            | 7.5283 | 6            |
| 5          | 1.0167            | 7.3262 | 3            |
| 6          | 1.0073            | 7.3262 | 3            |

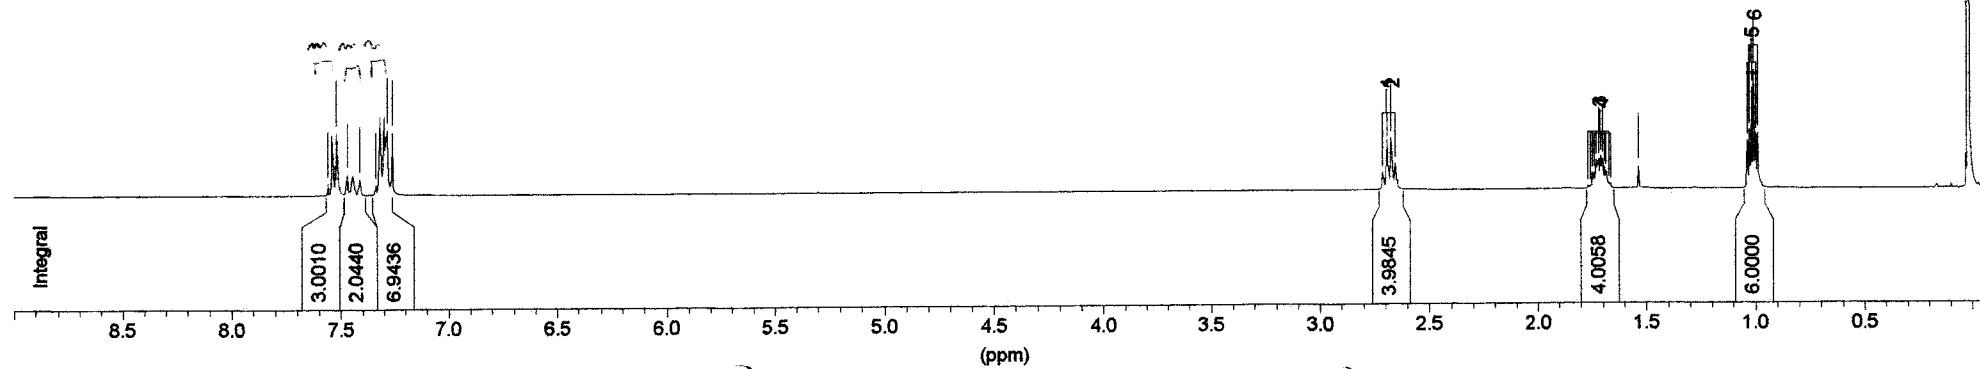

1-8-2 100.6 MHz

3,2',2'',3''-Tetrafluoro-4,4'''-dipropyl-[1,1':4'',1'':4''',1''']quaterphenyl

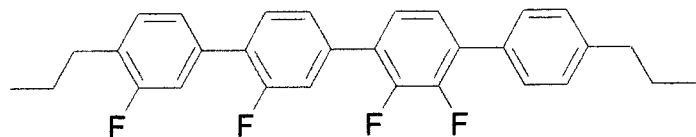

162.3061  
160.8574  
159.8727  
158.3863  
  
149.7244  
147.2270  
143.0897  
  
135.7583  
134.6114  
131.7367  
130.5370  
128.8016  
127.4661  
124.3084  
  
116.7330  
115.5447

| Identifier | Chem. Shift [ppm] | J [Hz]              | Multiplicity |
|------------|-------------------|---------------------|--------------|
| 1          | 161.0894          | 244.8239            | 2            |
| 2          | 159.6219          | 248.6196            | 2            |
| 3          | 148.5964          | 252.0357<br>15.9420 | 2<br>2       |
| 4          | 148.5530          | 251.2766<br>15.5624 | 2<br>2       |
| 5          | 143.0997          | -                   | 1            |
| 6          | 135.8017          | 8.7302              | 2            |
| 7          | 134.5699          | 8.3506              | 2            |
| 8          | 131.7404          | 0.7591              | 2            |
| 9          | 130.7275          | 5.6936              | 2            |
| 10         | 130.5558          | 3.7957              | 2            |
| 11         | 129.1581          | 16.3216             | 2            |
| 12         | 128.8016          | -                   | 1            |
| 13         | 128.7035          | -                   | 1            |
| 14         | 127.7585          | 1.8979              | 2            |
| 15         | 127.6849          | 5.3140              | 2            |
| 16         | 127.6057          | 2.2774              | 2            |
| 17         | 127.4755          | 1.8979              | 2            |
| 18         | 124.8611          | 3.4161              | 2            |
| 19         | 124.8253          | 3.7957              | 2            |
| 20         | 124.3245          | 3.2896              | 4            |
| 21         | 116.6123          | 24.2926             | 2            |
| 22         | 115.6805          | 23.9130<br>3.4161   | 2<br>2       |
| 23         | 37.8064           | -                   | 1            |
| 24         | 30.8649           | -                   | 1            |
| 25         | 24.4514           | -                   | 1            |
| 26         | 23.2857           | -                   | 1            |
| 27         | 13.8655           | -                   | 1            |
| 28         | 13.8580           | -                   | 1            |

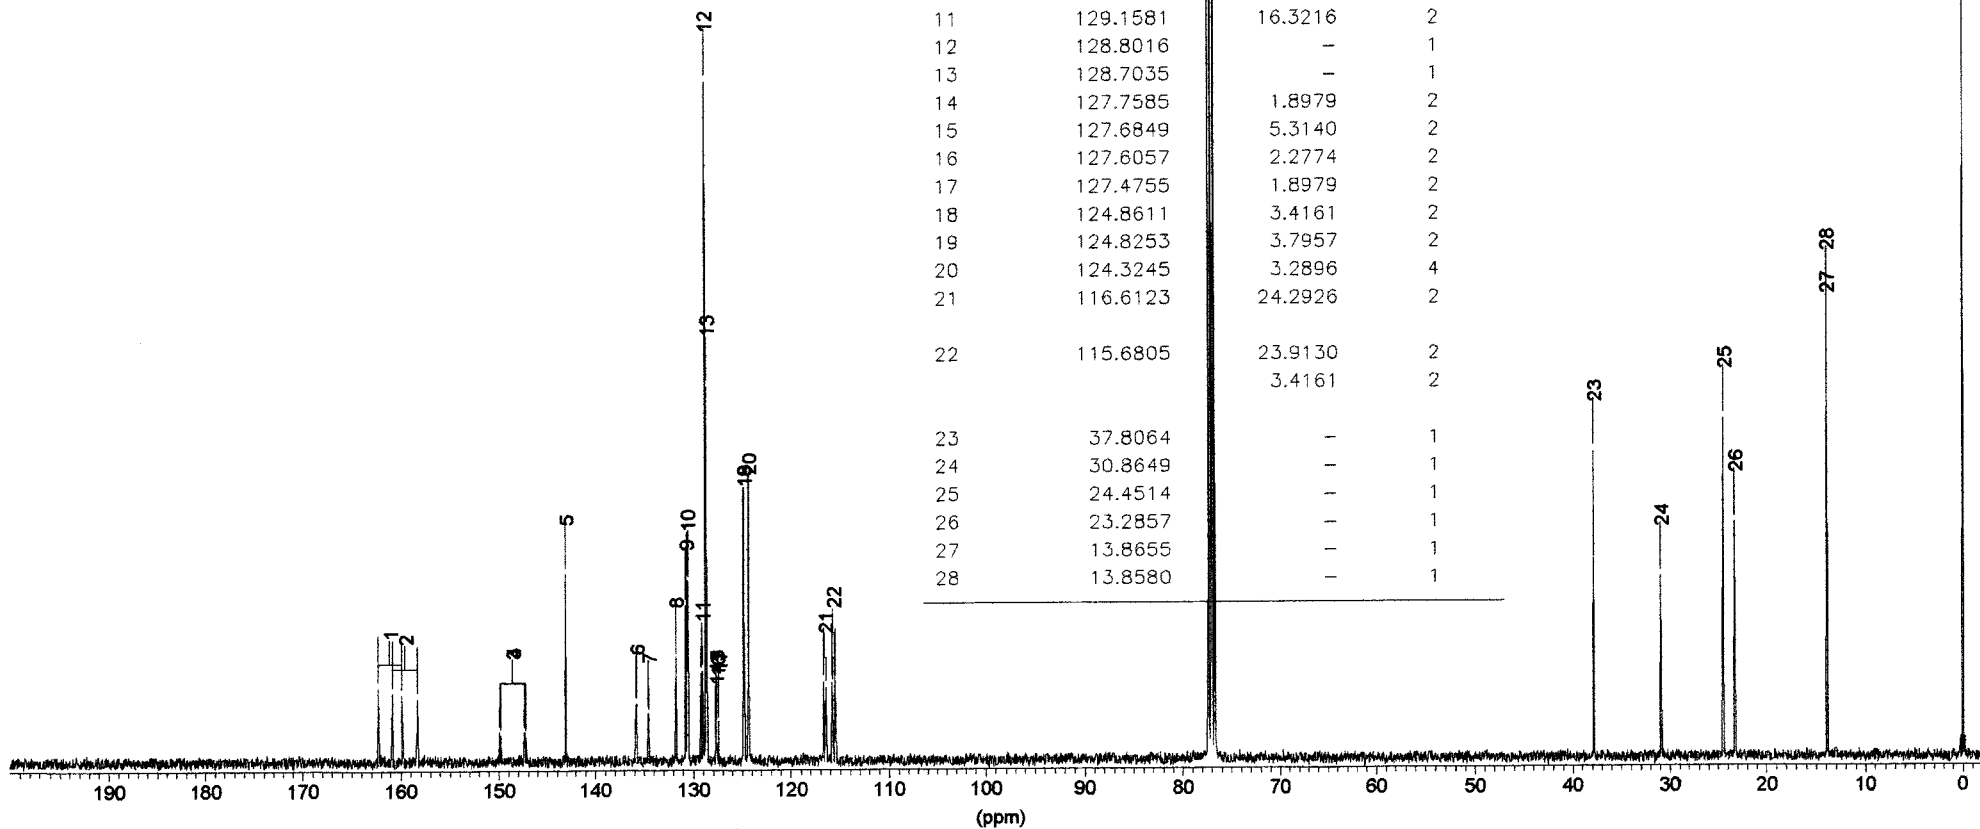

2-8-8 400.1 MHz

2',2'',3'',2''',3'''-Pentafluoro-4,4'''-dipropyl-[1,1':4',1'':4'',1''']quaterphenyl

7.5798  
7.5293  
7.4646  
7.4052  
7.3405  
7.2894  
7.2600  
7.2335  
7.1284  
7.0311

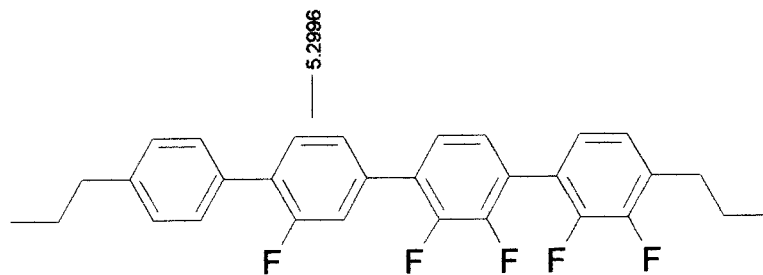

2.7211  
2.6655

1.7068  
1.5310

1.0032

0.0141

| Identifier | Chem. Shift [ppm] | J [Hz] | Multiplicity |
|------------|-------------------|--------|--------------|
| 1          | 7.2333            | 7.5789 | 3 <i>b-a</i> |
| 2          | 2.7212            | 7.3894 | 3            |
| 3          | 2.6653            | 7.5789 | 3            |
| 4          | 1.7190            | 7.4526 | 6            |
| 5          | 1.7163            | 7.5283 | 6            |
| 6          | 1.0211            | 7.1999 | 3            |
| 7          | 1.0033            | 7.2631 | 3            |

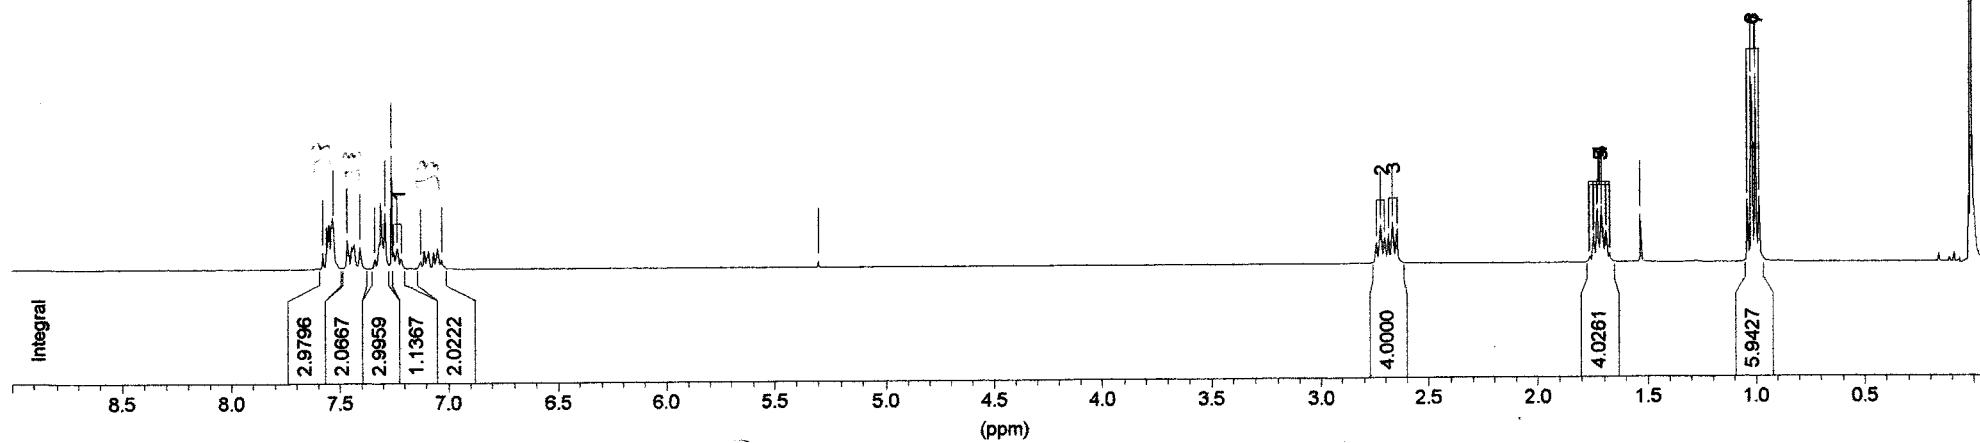



2-8-8 100.6 MHz

2,2',3',2'',3'''-Pentafluoro-4,4'''-dipropyl-[1,1':4',1'':4'',1''']quaterphenyl

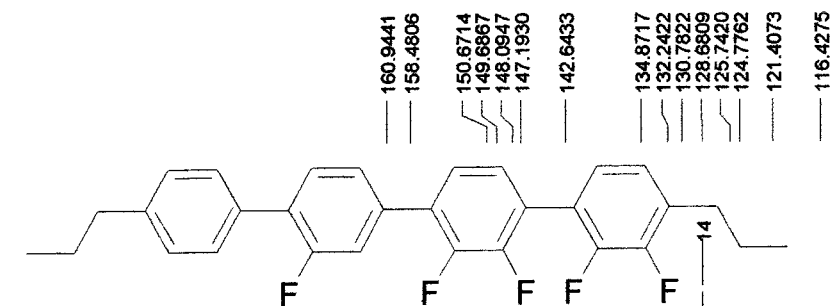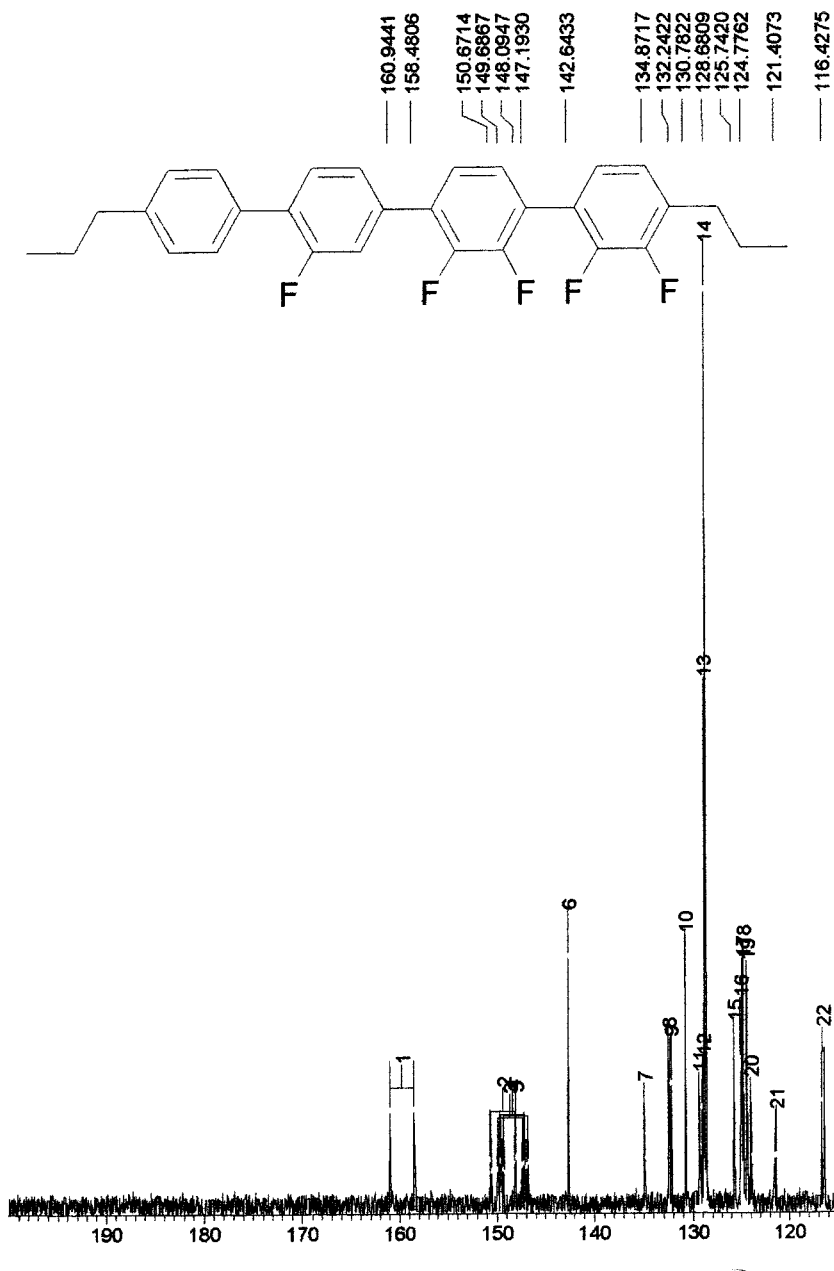

| Identifier | Chem. Shift [ppm] | J [Hz]   | Multiplicity |
|------------|-------------------|----------|--------------|
| 1          | 159.7124          | 247.8604 | 2            |
| 2          | 149.3821          | 246.5319 | 2            |
|            |                   | 12.7157  | 2            |
| 3          | 148.6304          | 251.6561 | 2            |
|            |                   | 14.0442  | 2            |
| 4          | 148.3701          | 250.8970 | 2            |
|            |                   | 14.0442  | 2            |
| 5          | 148.0730          | 250.7072 | 2            |
|            |                   | 14.2339  | 2            |
| 6          | 142.6433          | -        | 1            |
| 7          | 134.9255          | 8.9199   | 2            |
|            |                   | 1.7081   | 2            |
| 8          | 132.5063          | 1.5183   | 2            |
| 9          | 132.3082          | 13.2850  | 2            |
| 10         | 130.8030          | 4.1753   | 2            |
| 11         | 129.3345          | 10.4382  | 2            |
|            |                   | 1.7081   | 2            |
| 12         | 129.0053          | 13.6646  | 2            |
| 13         | 128.8280          | 3.0366   | 2            |
| 14         | 128.6809          | -        | 1            |
| 15         | 125.7609          | 1.8979   | 3            |
| 16         | 125.0139          | 1.8979   | 3            |
| 17         | 124.9057          | 4.3651   | 3            |
| 18         | 124.7750          | 3.2264   | 3            |
| 19         | 124.3876          | 3.4161   | 2            |
|            |                   | 3.0366   | 2            |
| 20         | 124.0094          | 12.3361  | 2            |
|            |                   | 2.4672   | 2            |
| 21         | 121.4790          | 14.4237  | 2            |
| 22         | 116.5670          | 24.6722  | 2            |
|            |                   | 3.4161   | 2            |
| 23         | 37.8140           | -        | 1            |
| 24         | 30.8535           | -        | 1            |
| 25         | 24.4741           | -        | 1            |
| 26         | 23.1574           | -        | 1            |
| 27         | 13.8881           | -        | 1            |
| 28         | 13.7750           | -        | 1            |

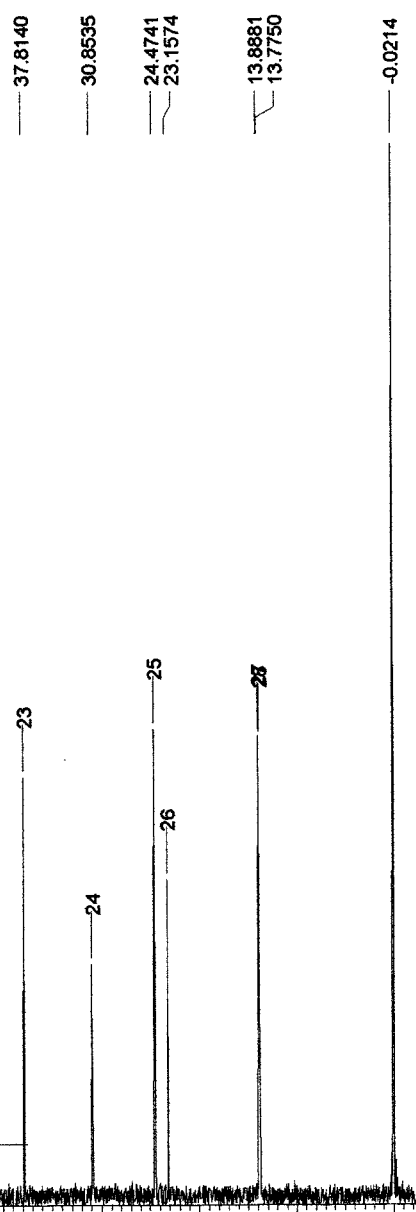

2-9-3 400.1 MHz

2',6',2'',3'',2'''-Pentafluoro-4,4'''-dipropyl-[1,1':4',1'':4'',1'''']quaterphenyl

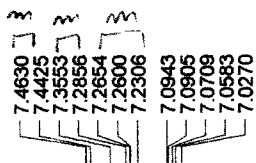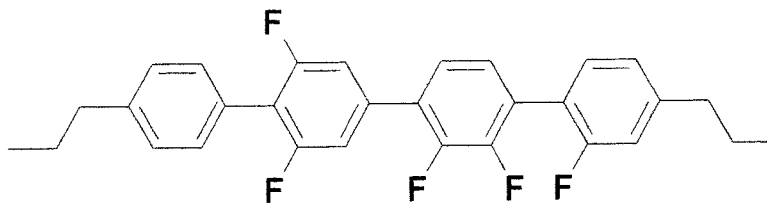

2.6649

1.7037

1.5281

1.0025

0.0110

| Identifier | Chem. Shift [ppm] | J [Hz]  | Multiplicity |
|------------|-------------------|---------|--------------|
| 1          | 7.0827            | 7.7683  | 2            |
|            |                   | 1.5789  | 2            |
| 2          | 7.0427            | 11.1788 | 2            |
|            |                   | 1.3263  | 2            |
| 3          | 2.6648            | 7.5157  | 3 <i>b.c</i> |
| 4          | 1.7189            | 7.5283  | 6            |
| 5          | 1.7131            | 7.5283  | 6            |
| 6          | 1.0044            | 7.3262  | 3            |
| 7          | 1.0025            | 7.3262  | 3            |

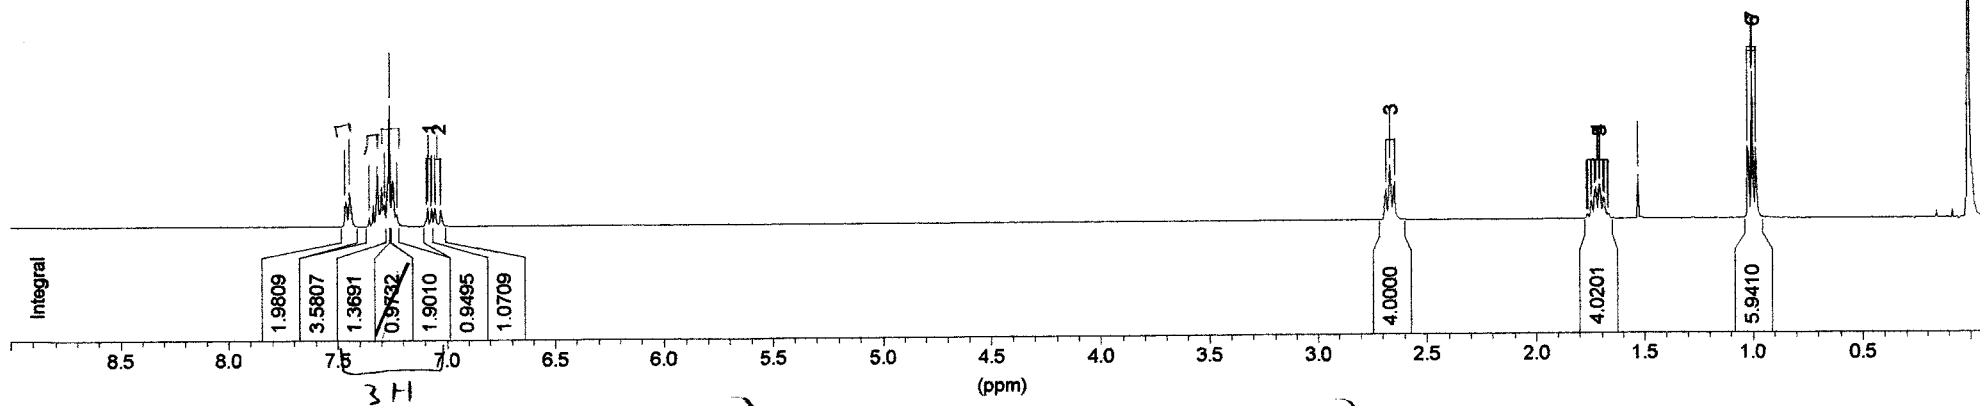

2-9-3 100.6 MHz

2',6',2'',3'',2'''-Pentafluoro-4,4'''-dipropyl-[1,1':4',1'':4'',1'''-quaterphenyl]

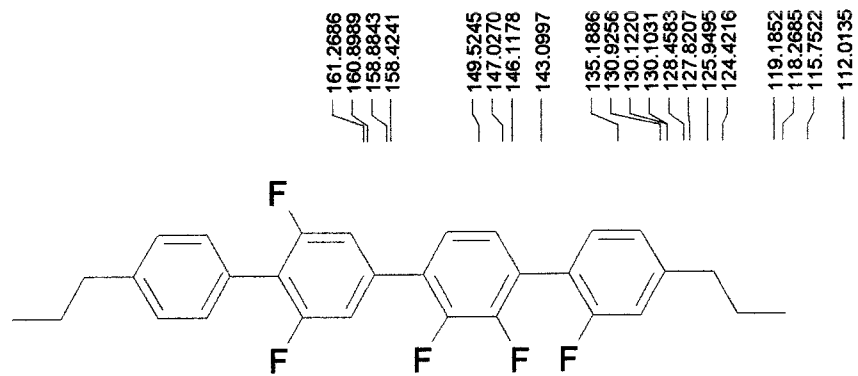

- 161.2686
- 160.8989
- 158.8843
- 158.4241
- 149.5245
- 147.0270
- 146.1178
- 143.0997
- 135.1886
- 130.9256
- 130.1220
- 130.1031
- 128.4583
- 127.8207
- 125.9495
- 124.4216
- 119.1852
- 118.2685
- 115.7522
- 112.0135

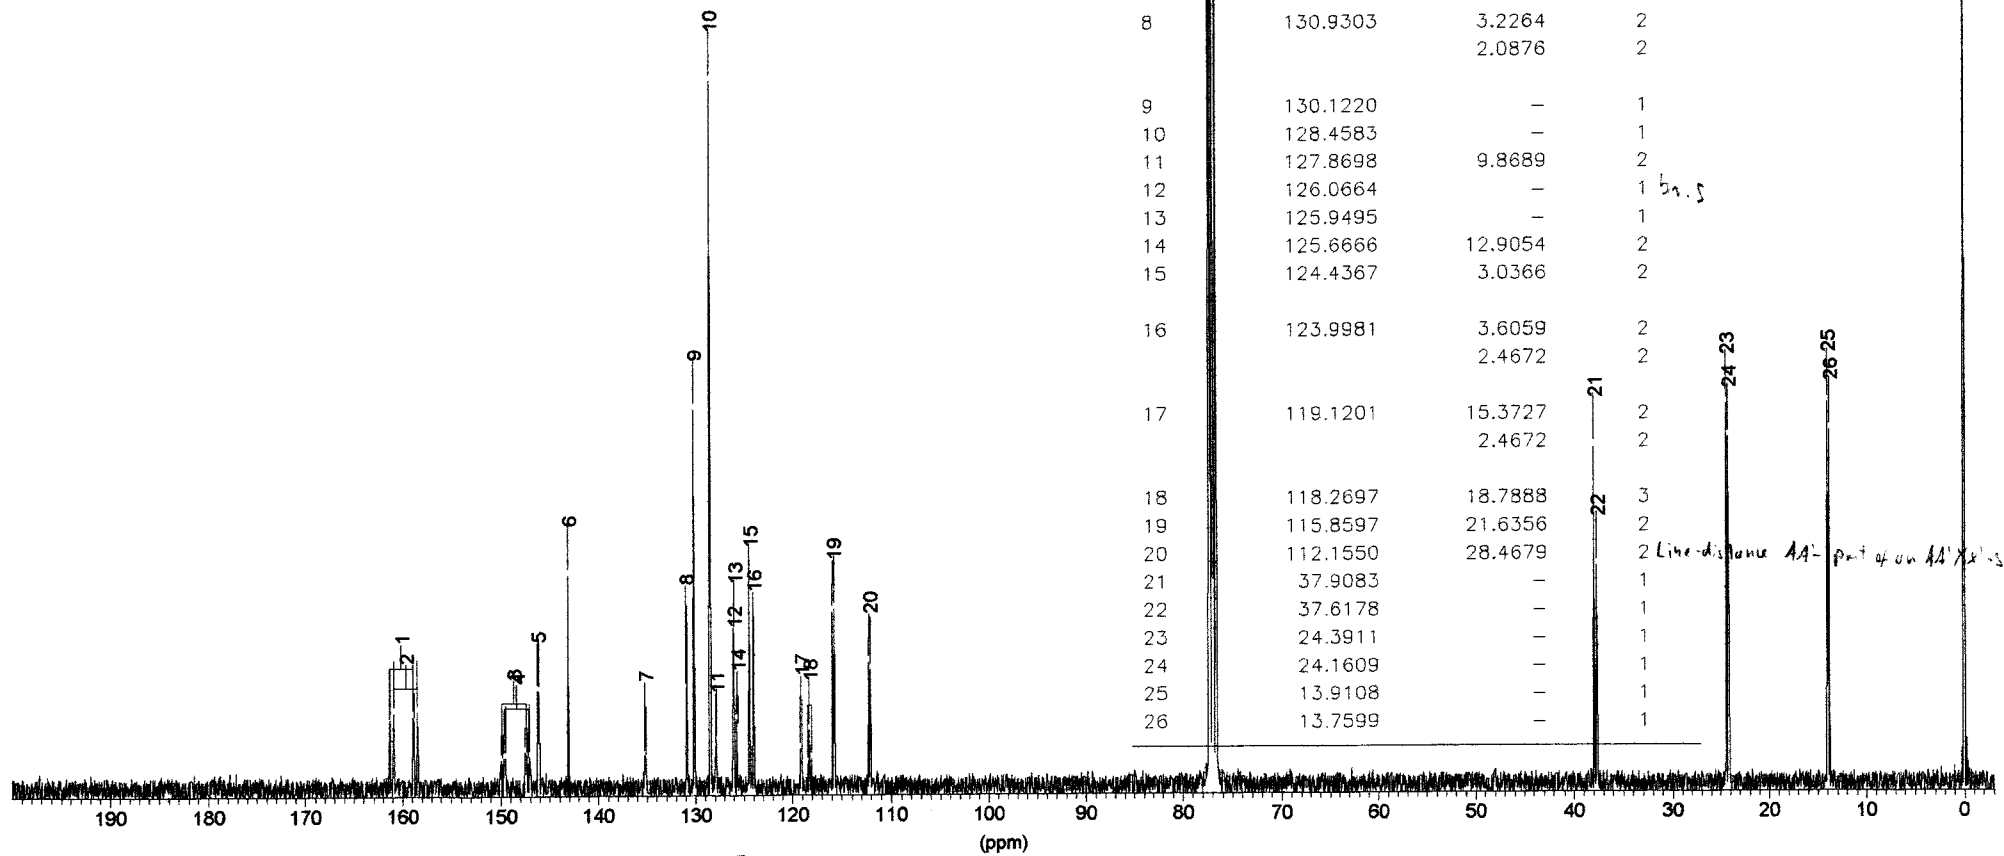

| Identifier | Chem. Shift [ppm] | J [Hz]              | Multiplicity                                  |
|------------|-------------------|---------------------|-----------------------------------------------|
| 1          | 160.0765          | 248.2400<br>8.3506  | 2<br>2                                        |
| 2          | 159.6615          | 248.9991            | 2                                             |
| 3          | 148.6549          | 251.2766<br>14.0442 | 2<br>2                                        |
| 4          | 148.3465          | 251.4664<br>14.2339 | 2<br>2                                        |
| 5          | 146.1556          | 7.5914              | 2                                             |
| 6          | 143.0997          | -                   | 1                                             |
| 7          | 135.1471          | 11.0076<br>2.6570   | 2<br>2                                        |
| 8          | 130.9303          | 3.2264<br>2.0876    | 2<br>2                                        |
| 9          | 130.1220          | -                   | 1                                             |
| 10         | 128.4583          | -                   | 1                                             |
| 11         | 127.8698          | 9.8689              | 2                                             |
| 12         | 126.0664          | -                   | 1 <i>br. s</i>                                |
| 13         | 125.9495          | -                   | 1                                             |
| 14         | 125.6666          | 12.9054             | 2                                             |
| 15         | 124.4367          | 3.0366              | 2                                             |
| 16         | 123.9981          | 3.6059<br>2.4672    | 2<br>2                                        |
| 17         | 119.1201          | 15.3727<br>2.4672   | 2<br>2                                        |
| 18         | 118.2697          | 18.7888             | 3                                             |
| 19         | 115.8597          | 21.6356             | 2                                             |
| 20         | 112.1550          | 28.4679             | 2 <i>Line distance AA- part of an AA'X2's</i> |
| 21         | 37.9083           | -                   | 1                                             |
| 22         | 37.6178           | -                   | 1                                             |
| 23         | 24.3911           | -                   | 1                                             |
| 24         | 24.1609           | -                   | 1                                             |
| 25         | 13.9108           | -                   | 1                                             |
| 26         | 13.7599           | -                   | 1                                             |

1-10-2 400.1 MHz

3,2',6',2''-Tetrafluoro-4,4'''-dipropyl-[1,1':4',4'':1'':1''']quaterphenyl

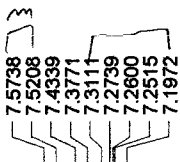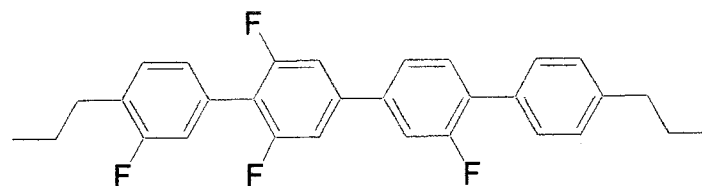

1.7071

1.5307

1.0063

0.0207

| Identifier | Chem. Shift [ppm] | J [Hz]  | Multiplicity     |
|------------|-------------------|---------|------------------|
| 1          | 7.4462            | 8.0210  | 2                |
|            |                   | 1.8316  | 2                |
| 2          | 7.3940            | 11.7472 | 2                |
|            |                   | 1.7684  | 2                |
| 3          | 2.6957            | 7.7683  | 3                |
| 4          | 2.6679            | 7.8315  | 3                |
| 5          | 1.7166            | 7.5283  | 6 <i>br. sep</i> |
| 6          | 1.0207            | 7.2631  | 3                |
| 7          | 1.0063            | 7.3262  | 3                |

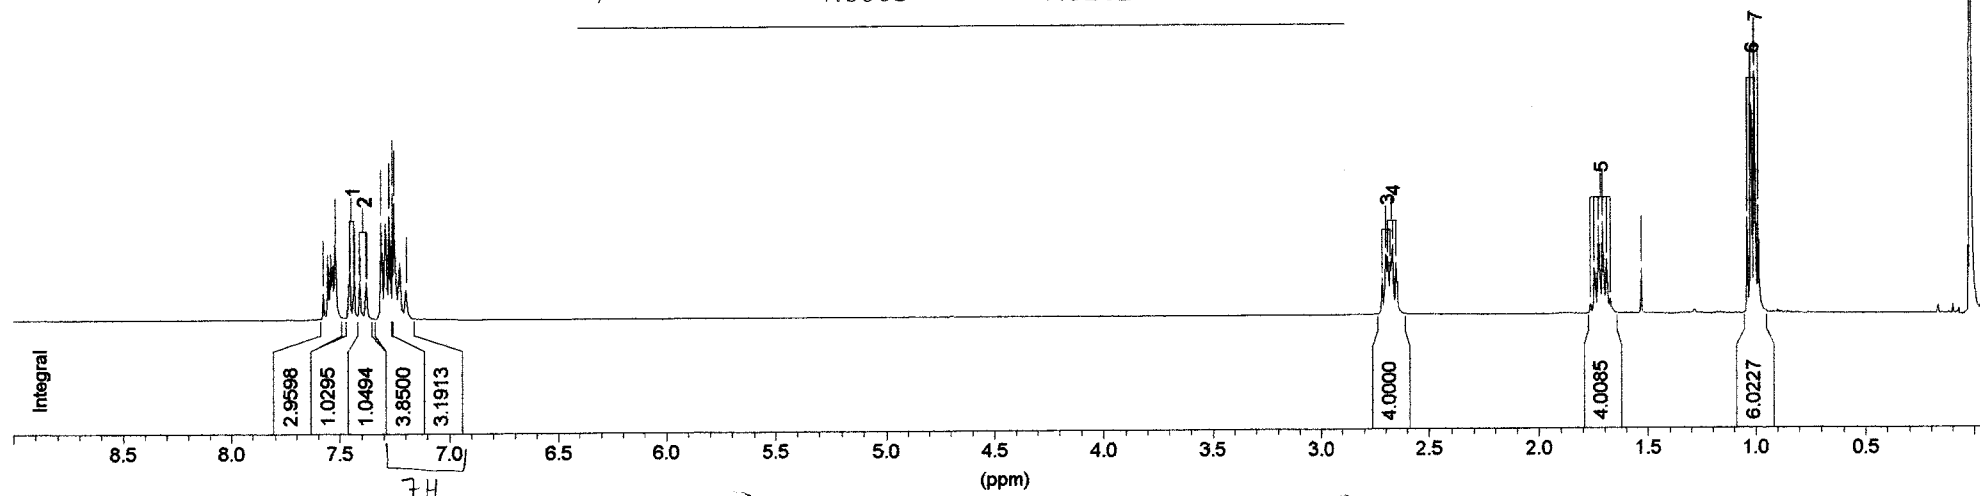

1-10-2 100.6 MHz

3,2',6,2"-Tetrafluoro-4,4"-dipropyl-[1,1':4',4'':1'',1''']quaterphenyl

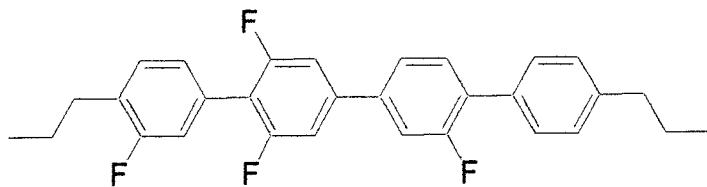

| Identifier | Chem. Shift [ppm] | J [Hz]   | Multiplicity         |
|------------|-------------------|----------|----------------------|
| 1          | 160.8498          | 244.4443 | 2                    |
| 2          | 160.3075          | 248.8094 | 2                    |
| 3          | 160.1085          | 248.6196 | 2                    |
| 4          | 142.7112          | -        | 1                    |
| 5          | 140.9544          | 9.9638   | 3                    |
| 6          | 139.0612          | 8.2241   | 2                    |
| 7          | 132.3648          | 1.1387   | 2                    |
| 8          | 131.2179          | 4.1753   | 2                    |
| 9          | 130.4596          | 5.6936   | 2                    |
| 10         | 129.6938          | 16.3216  | 2                    |
| 11         | 129.1260          | 13.6646  | 2                    |
| 12         | 128.7752          | 3.0366   | 2                    |
| 13         | 128.7035          | -        | 1                    |
| 14         | 127.9735          | 8.7302   | 2                    |
| 15         | 125.7873          | -        | 1 <i>bn. s.</i>      |
| 16         | 122.5787          | 3.4161   | 2                    |
| 17         | 117.0707          | 23.9130  | 2                    |
| 18         | 116.5130          | 18.4092  | 3                    |
| 19         | 114.4336          | 24.6722  | 2                    |
| 20         | 110.0801          | 27.7087  | 2                    |
| 21         | 37.8064           | -        | 1                    |
| 22         | 30.9328           | -        | 1                    |
| 23         | 24.4778           | -        | 1                    |
| 24         | 23.2253           | -        | 1                    |
| 25         | 13.8806           | -        | 1 } <i>2 signals</i> |
| 26         | 13.8806           | -        | 1 }                  |

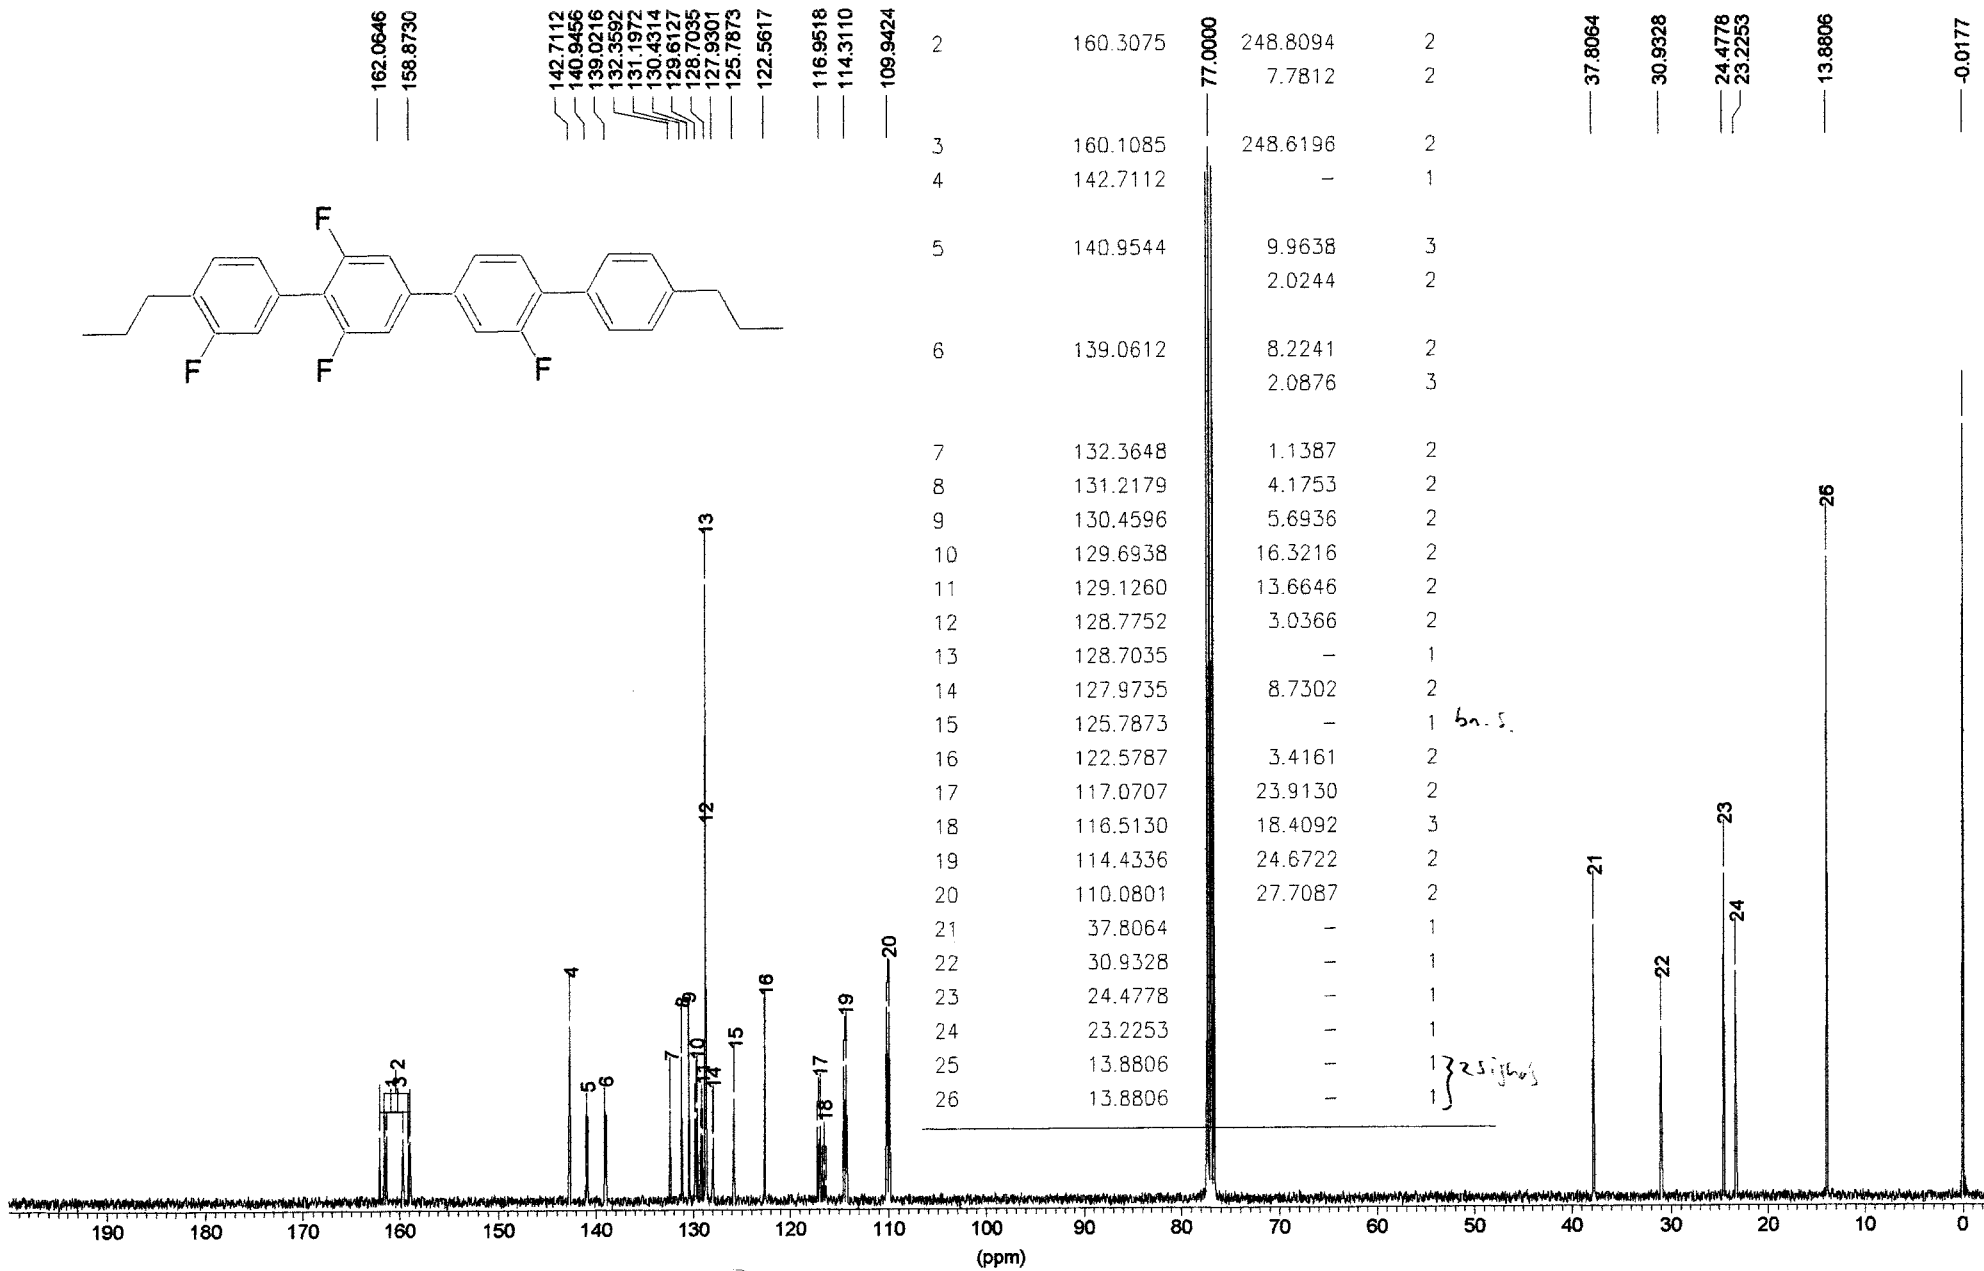

2-11-7 400.1 MHz

2',6',3'',5''-Tetrafluoro-4,4''-dipropyl-[1,1':4',1'':4'',1''']quaterphenyl

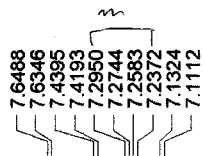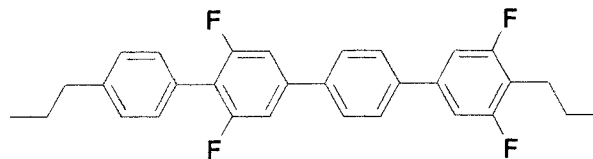

2.7052  
2.6288

1.7474  
1.6111  
1.5059

0.9885

0.0001

| Identifier | Chem. Shift [ppm] | J [Hz] | Multiplicity |
|------------|-------------------|--------|--------------|
| 1          | 7.4294            | 8.0841 | 2            |
| 2          | 7.1218            | 8.4631 | 2            |
| 3          | 2.6862            | 7.6420 | 3            |
| 4          | 2.6482            | 7.7052 | 3            |
| 5          | 1.6909            | 7.7052 | 5            |
| 6          | 1.6668            | 7.5789 | 5            |
| 7          | 0.9884            | 7.3894 | 3 <i>brt</i> |

*line-distance AA'-part of an AA'X<sub>2</sub>X'-system*

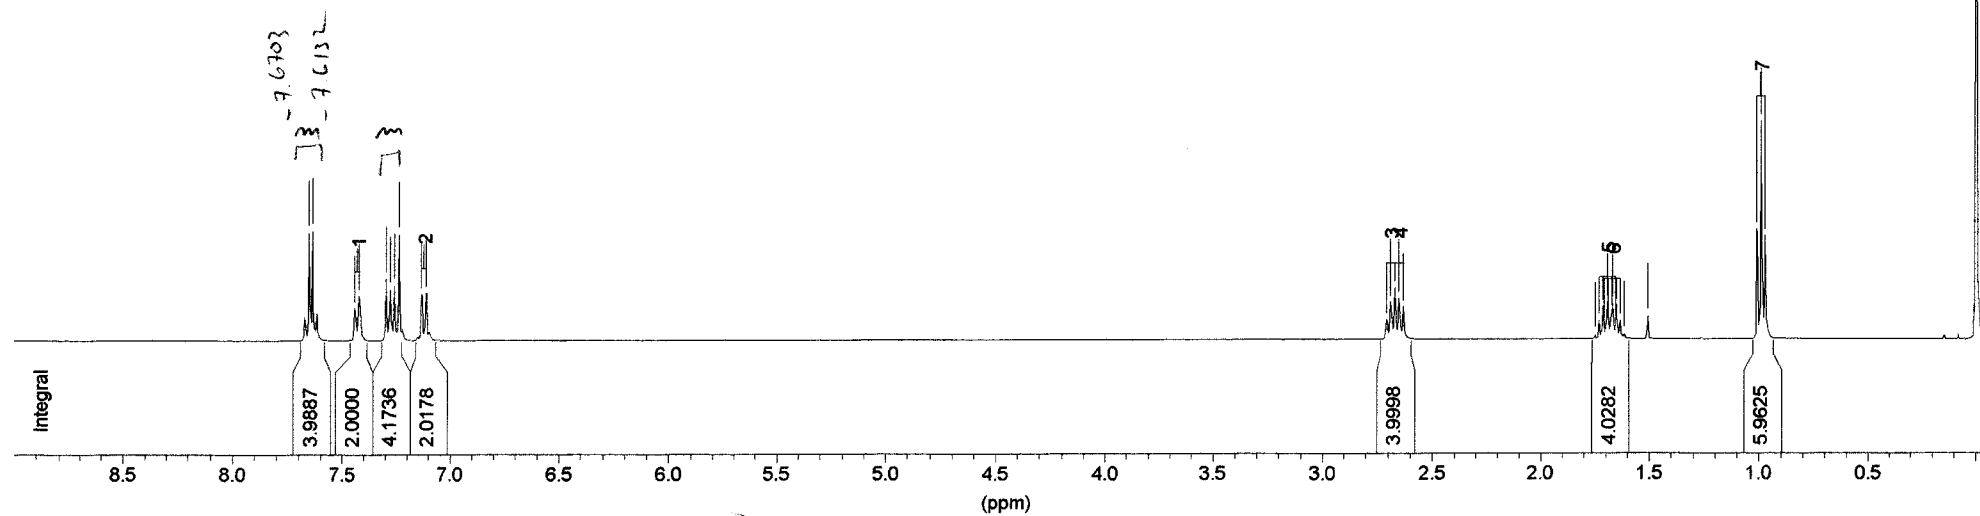

2-11-7 100.6 MHz

2',6',3'',5''-Tetrafluoro-4,4''-dipropyl-[1,1':4',1''':4'',1''']quaterphenyl

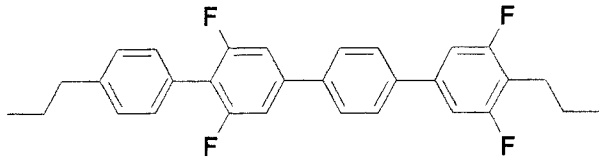

- 163.0945
- 161.6232
- 160.6461
- 159.1597
- 142.9488
- 141.2361
- 139.9044
- 138.9725
- 138.3199
- 130.1220
- 128.4319
- 127.3265
- 126.1570
- 117.0952
- 109.8631

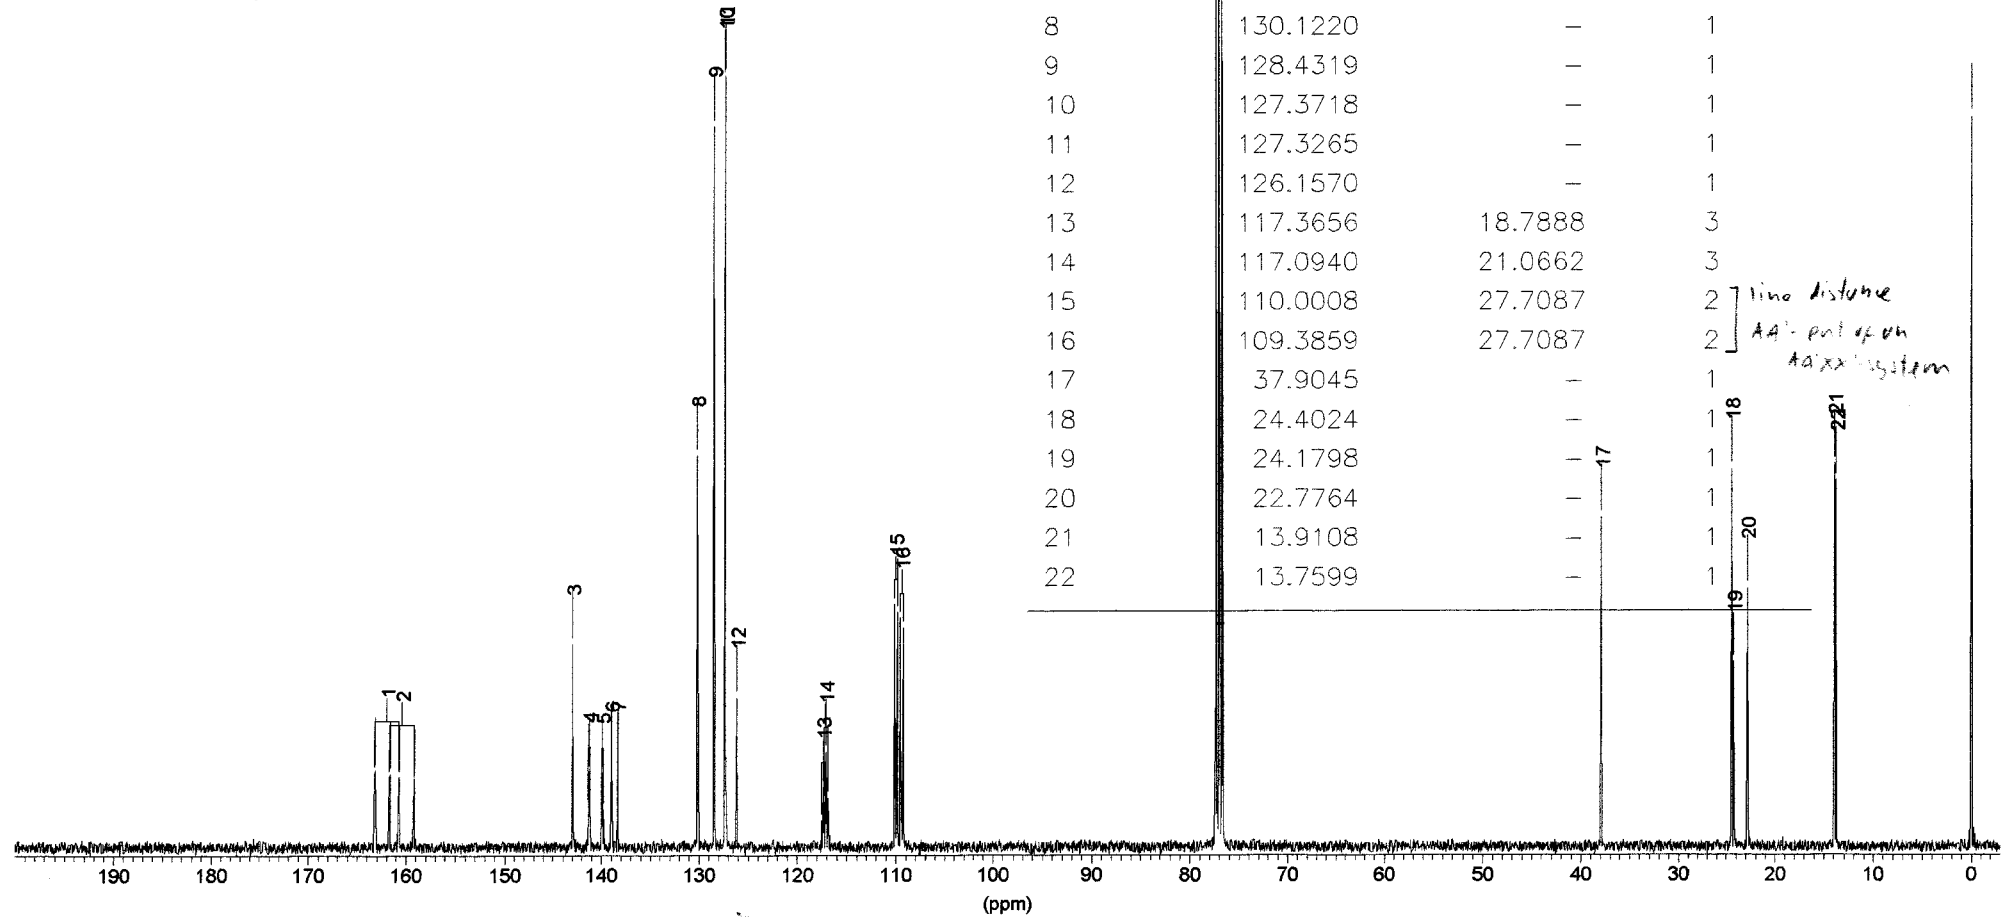

| Identifier | Chem. Shift [ppm] | J [Hz]   | Multiplicity |
|------------|-------------------|----------|--------------|
| 1          | 161.9213          | 246.3421 | 2            |
|            |                   | 10.2484  | 2            |
| 2          | 160.4330          | 247.8604 | 2            |
|            |                   | 8.3506   | 2            |
| 3          | 142.9488          | -        | 1            |
| 4          | 141.2373          | 10.0587  | 3            |
| 5          | 139.9044          | 9.8689   | 3            |
| 6          | 138.9738          | 2.4672   | 3            |
| 7          | 138.3186          | 2.4672   | 3            |
| 8          | 130.1220          | -        | 1            |
| 9          | 128.4319          | -        | 1            |
| 10         | 127.3718          | -        | 1            |
| 11         | 127.3265          | -        | 1            |
| 12         | 126.1570          | -        | 1            |
| 13         | 117.3656          | 18.7888  | 3            |
| 14         | 117.0940          | 21.0662  | 3            |
| 15         | 110.0008          | 27.7087  | 2            |
| 16         | 109.3859          | 27.7087  | 2            |
| 17         | 37.9045           | -        | 1            |
| 18         | 24.4024           | -        | 1            |
| 19         | 24.1798           | -        | 1            |
| 20         | 22.7764           | -        | 1            |
| 21         | 13.9108           | -        | 1            |
| 22         | 13.7599           | -        | 1            |

line distance  
AA' - part of an  
AA'XX' system

## Blank-chromatogram

sample: 20  $\mu$ L pure dichloromethane

eluent: hexane/dichloromethane 99 : 1 isocratic : 2ml/min

null1 98 (1.822)

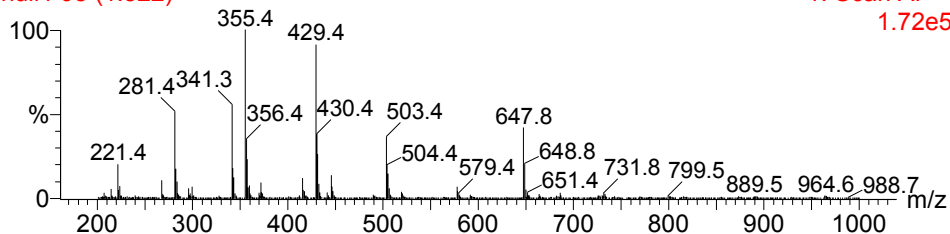

1: Scan AP+ null1 349 (6.424)  
1.72e5

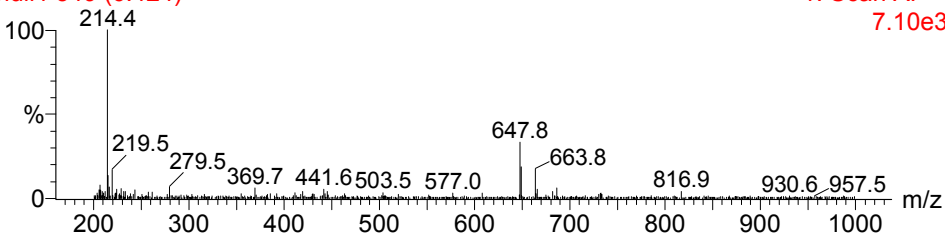

1: Scan AP+  
7.10e3

null1

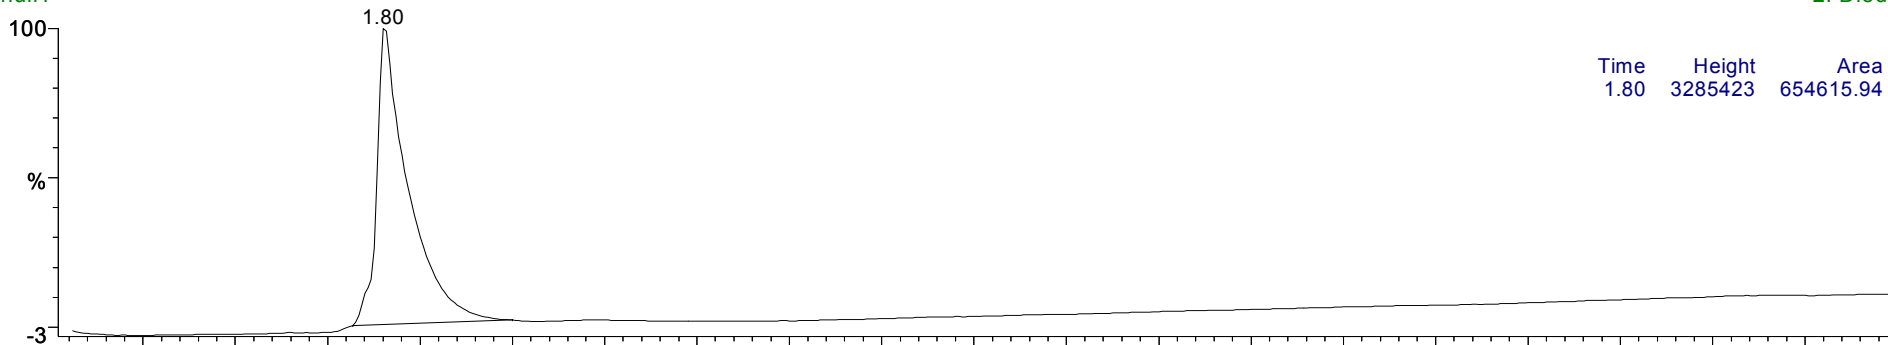

2: Diode Array  
TIC

| Time | Height  | Area      | Area%  |
|------|---------|-----------|--------|
| 1.80 | 3285423 | 654615.94 | 100.00 |

null1

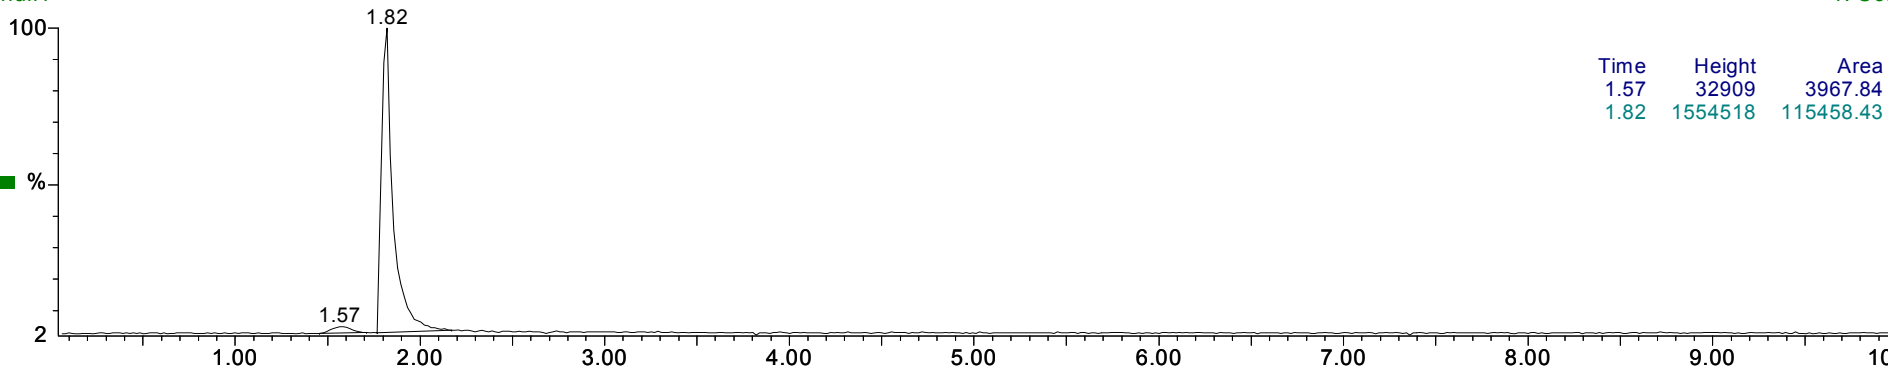

1: Scan AP+  
TIC

| Time | Height  | Area      | Area% |
|------|---------|-----------|-------|
| 1.57 | 32909   | 3967.84   | 3.32  |
| 1.82 | 1554518 | 115458.43 | 96.68 |

The peak at 1.80 min. in the UV-trace and the peaks  $m/z = 214$  and  $648$  in the mass-spectrum, which show up systematically in the data of the library-characterization, are *not* due to impurities of the analyzed library member. They are intrinsic to the used HPLC-MS system.



480

111-99 775 (13.032)

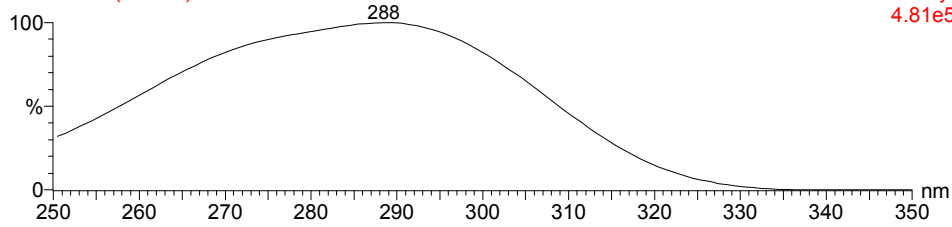

480

2: Diode Array 111-99 710 (13.054)  
4.81e5

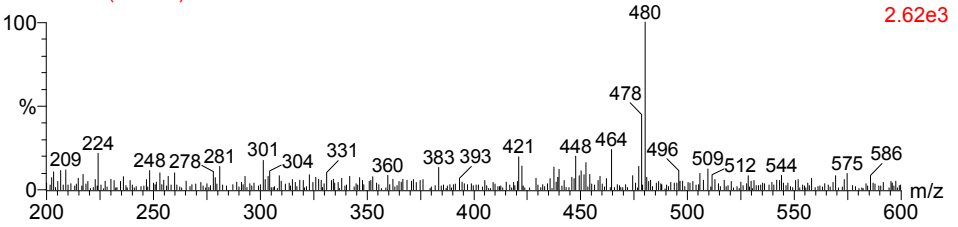

1: Scan AP+  
2.62e3

462

112-99 924 (15.515)

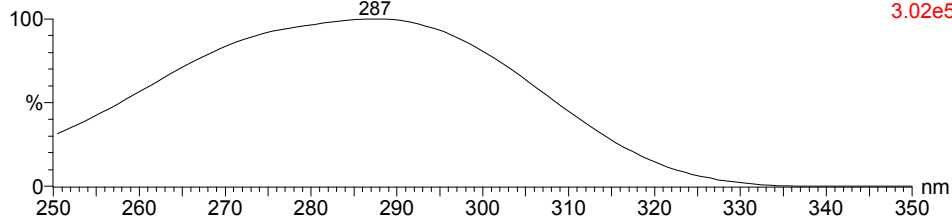

462

2: Diode Array 112-99 845 (15.525)  
3.02e5

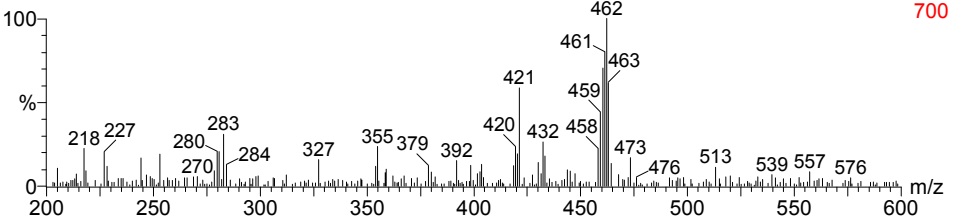

1: Scan AP+  
700

480

113-99 940 (15.782)

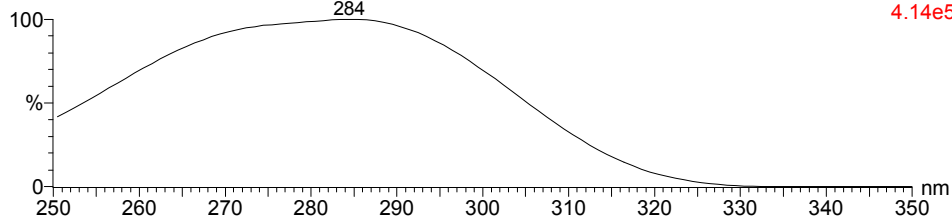

480

2: Diode Array 113-99 863 (15.853)  
4.14e5

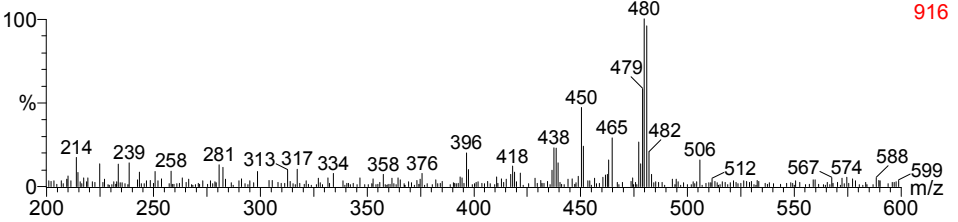

1: Scan AP+  
916

498

117-99 584 (9.850)

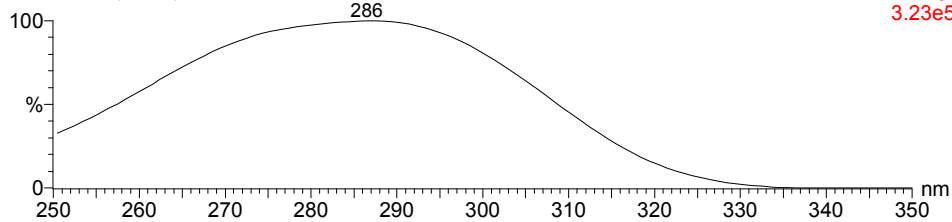

498

2: Diode Array 117-99 533 (9.810)  
3.23e5

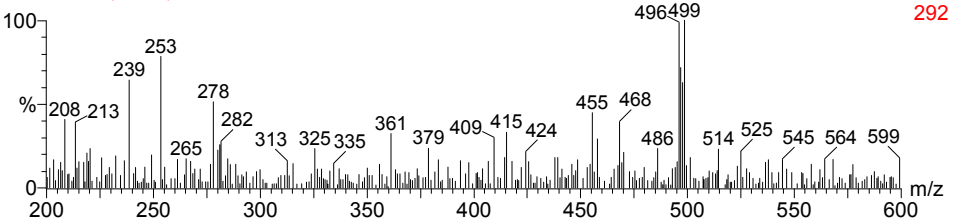

1: Scan AP+  
292

498

118-99 879 (14.767)

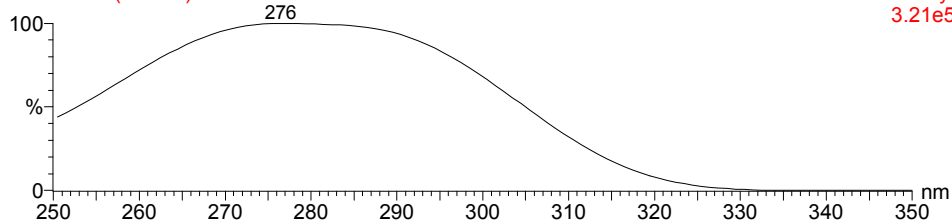

498

2: Diode Array 118-99 799 (14.683)  
3.21e5

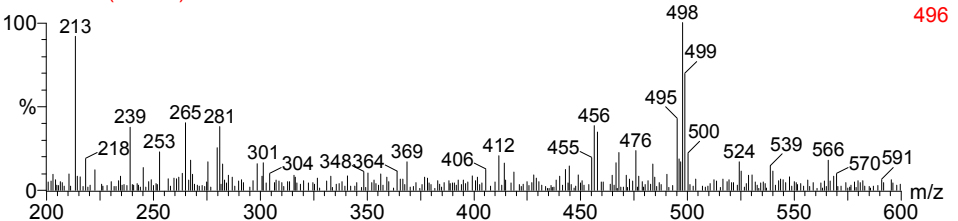

1: Scan AP+  
496

111-99

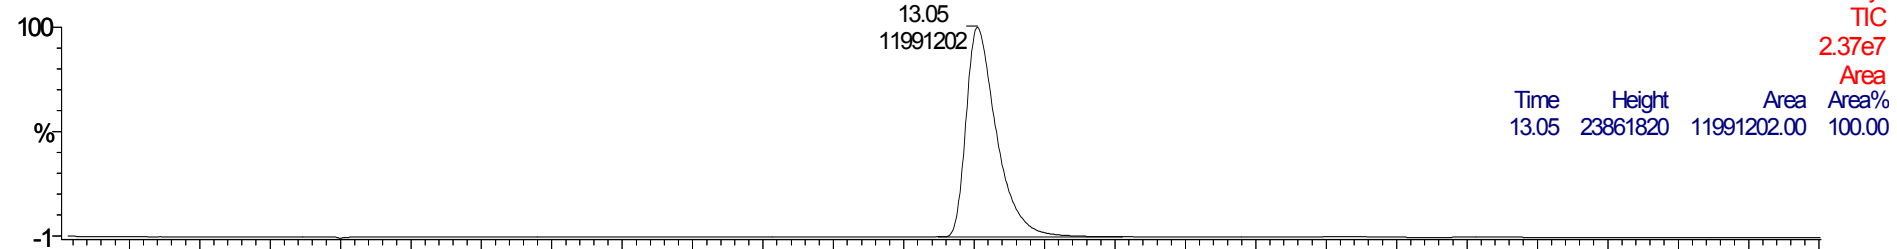

| 2: Diode Array |          |             |        |
|----------------|----------|-------------|--------|
| TIC            |          |             |        |
| 2.37e7         |          |             |        |
| Area           |          |             |        |
| Time           | Height   | Area        | Area%  |
| 13.05          | 23861820 | 11991202.00 | 100.00 |

112-99

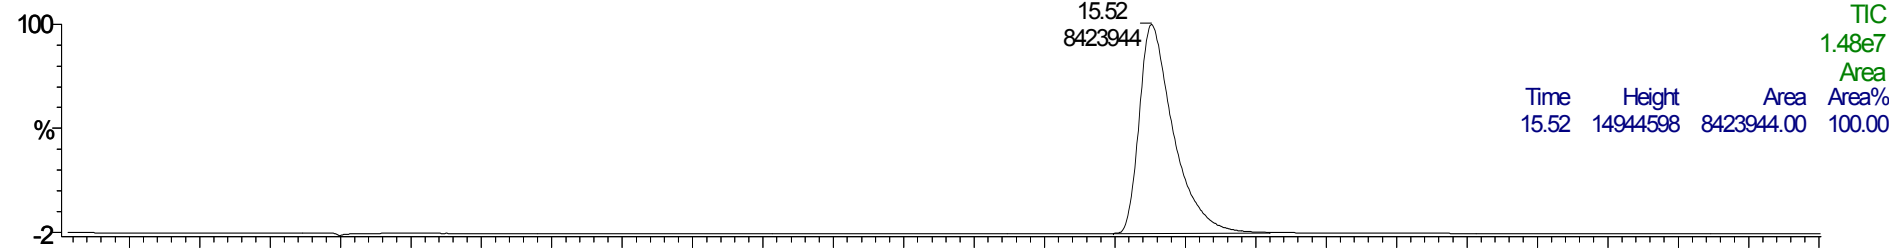

| 2: Diode Array |          |            |        |
|----------------|----------|------------|--------|
| TIC            |          |            |        |
| 1.48e7         |          |            |        |
| Area           |          |            |        |
| Time           | Height   | Area       | Area%  |
| 15.52          | 14944598 | 8423944.00 | 100.00 |

113-99

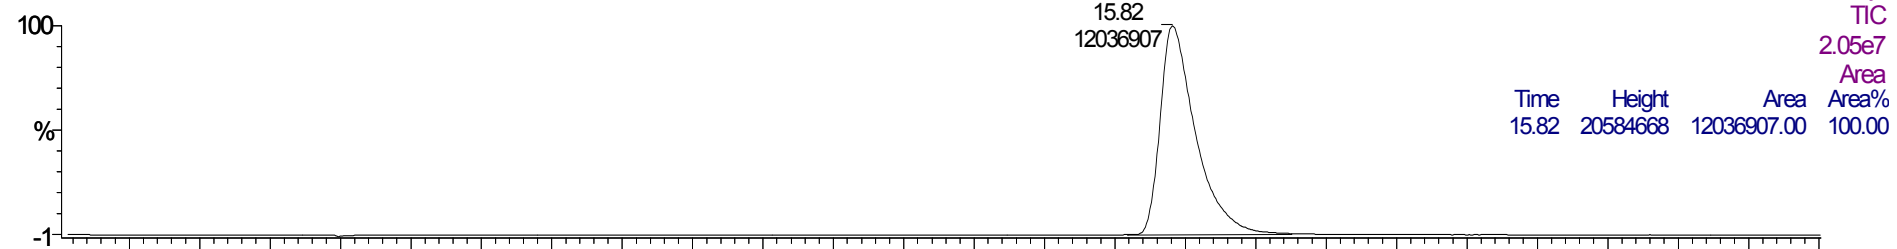

| 2: Diode Array |          |             |        |
|----------------|----------|-------------|--------|
| TIC            |          |             |        |
| 2.05e7         |          |             |        |
| Area           |          |             |        |
| Time           | Height   | Area        | Area%  |
| 15.82          | 20584668 | 12036907.00 | 100.00 |

117-99

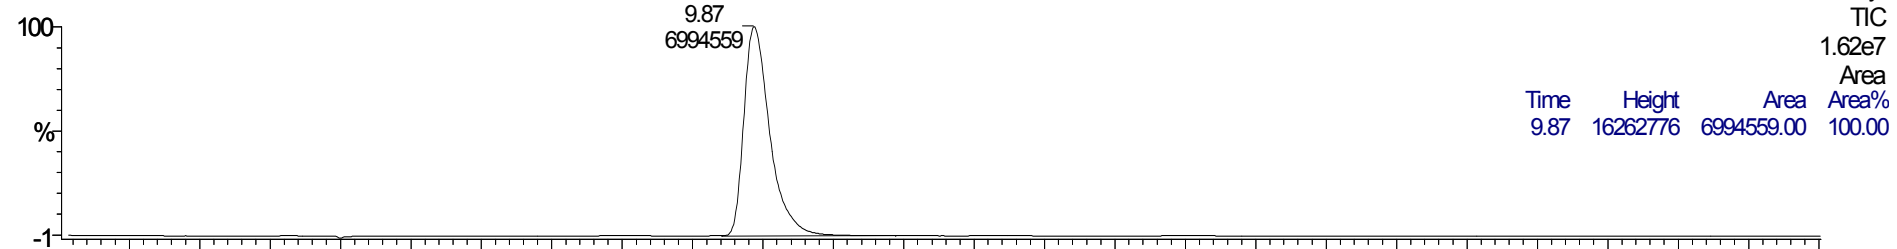

| 2: Diode Array |          |            |        |
|----------------|----------|------------|--------|
| TIC            |          |            |        |
| 1.62e7         |          |            |        |
| Area           |          |            |        |
| Time           | Height   | Area       | Area%  |
| 9.87           | 16262776 | 6994559.00 | 100.00 |

118-99

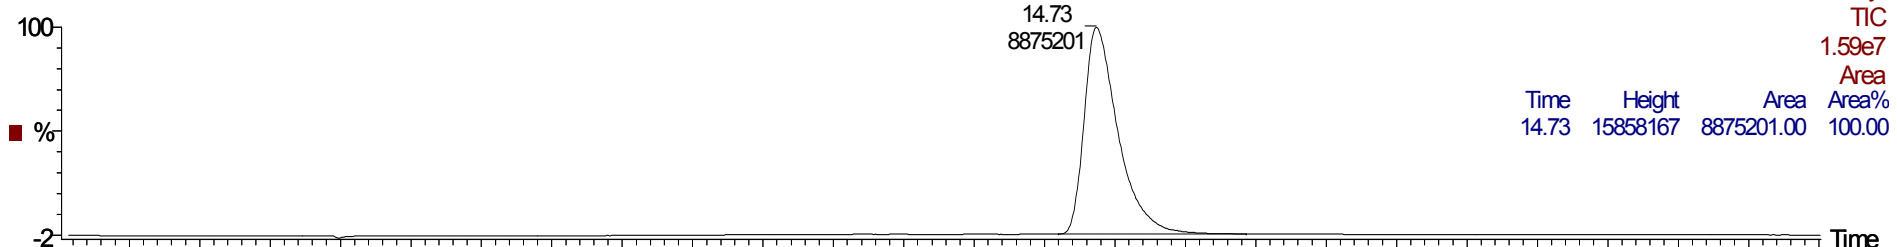

| 2: Diode Array |          |            |        |
|----------------|----------|------------|--------|
| TIC            |          |            |        |
| 1.59e7         |          |            |        |
| Area           |          |            |        |
| Time           | Height   | Area       | Area%  |
| 14.73          | 15858167 | 8875201.00 | 100.00 |

Time

462

121-99 845 (14.193)

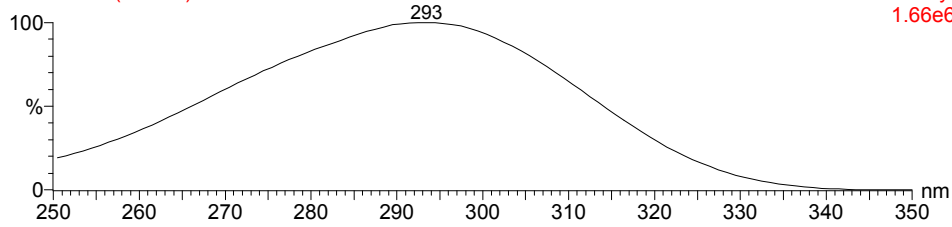

462

2: Diode Array 121-99 780 (14.329)

1.66e6

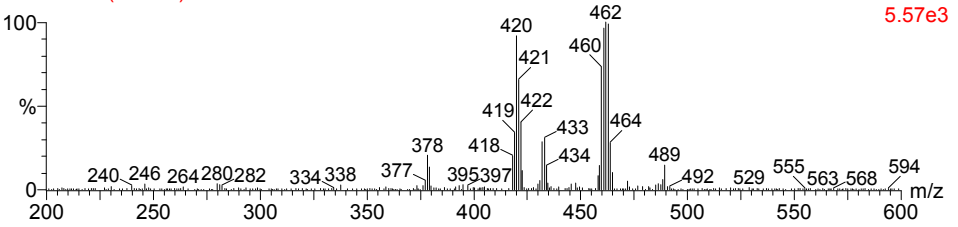

1: Scan AP+ 5.57e3

444

122-99 1015 (17.032)

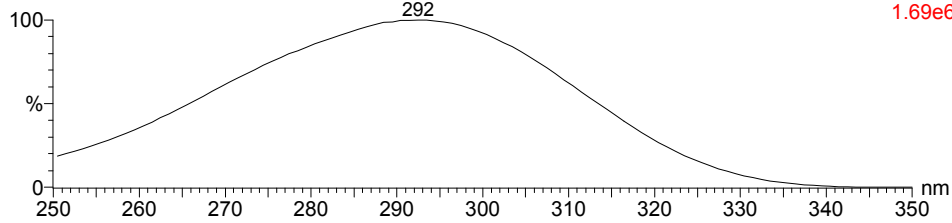

444

2: Diode Array 122-99 931 (17.099)

1.69e6

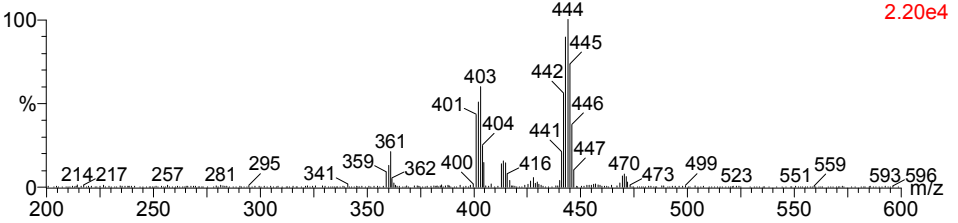

1: Scan AP+ 2.20e4

462

123-99 1019 (17.103)

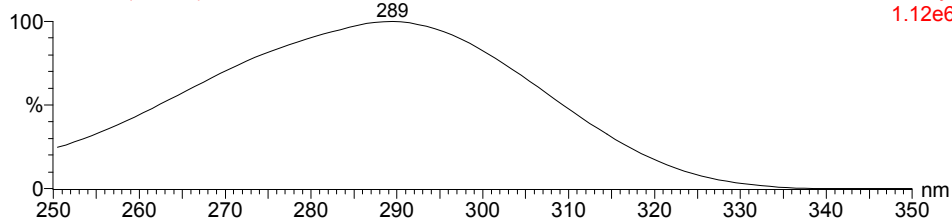

462

2: Diode Array 123-99 930 (17.078)

1.12e6

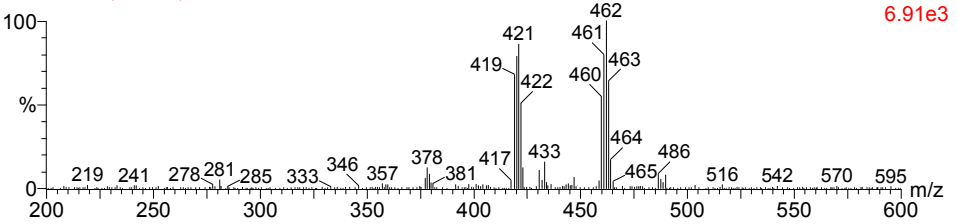

1: Scan AP+ 6.91e3

480

127-99 646 (10.892)

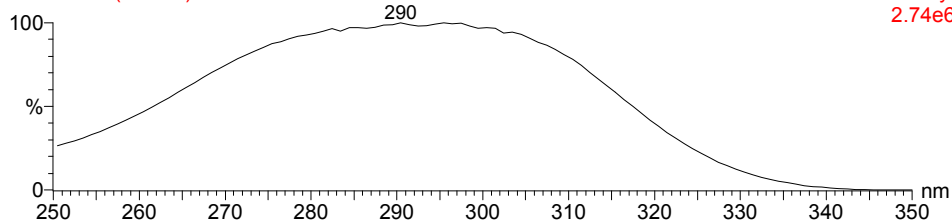

480

2: Diode Array 127-99 595 (10.939)

2.74e6

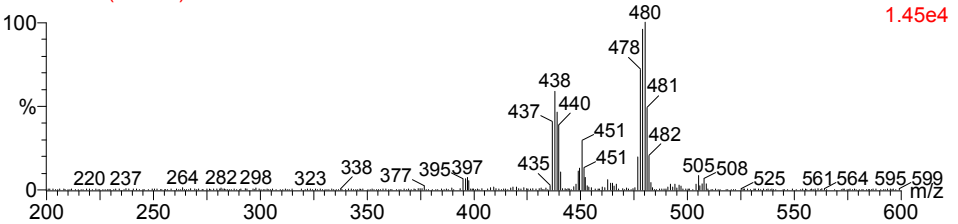

1: Scan AP+ 1.45e4

480

128-99 970 (16.278)

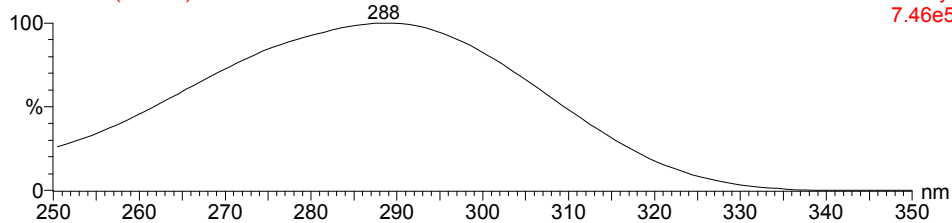

480

2: Diode Array 128-99 891 (16.367)

7.46e5

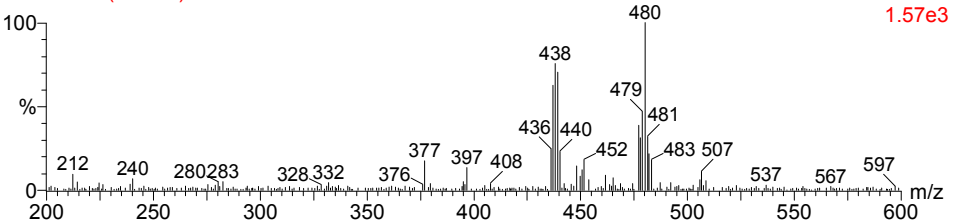

1: Scan AP+ 1.57e3

121-99

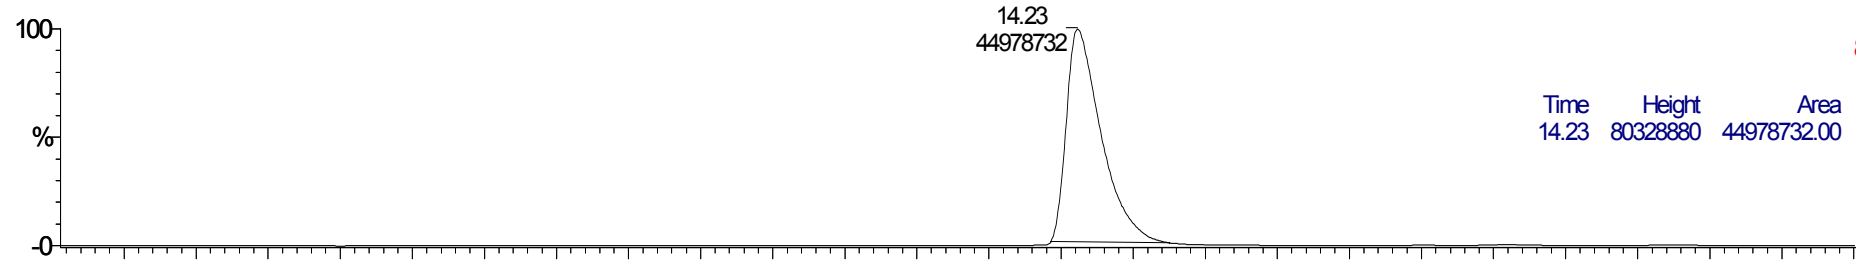

2: Diode Array  
TIC  
8.18e7  
Area

| Time  | Height   | Area        | Area%  |
|-------|----------|-------------|--------|
| 14.23 | 80328880 | 44978732.00 | 100.00 |

122-99

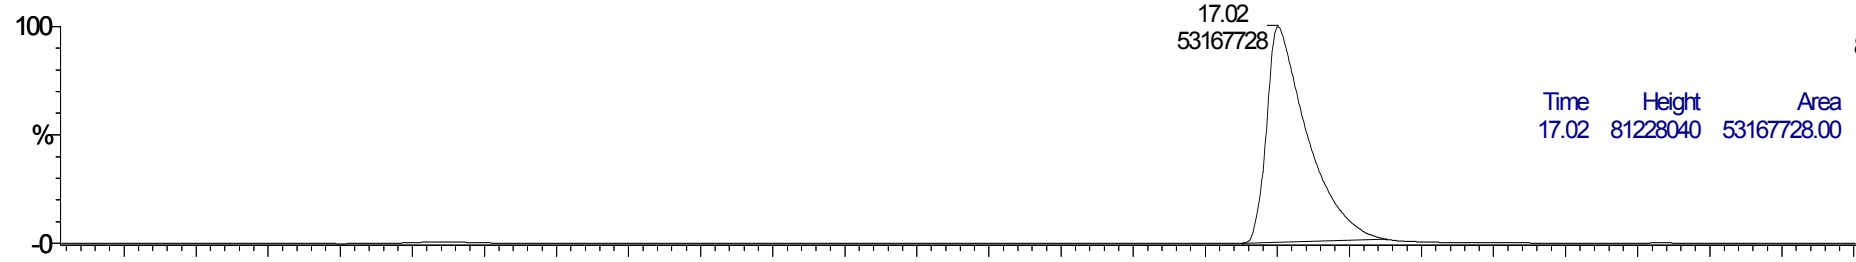

2: Diode Array  
TIC  
8.17e7  
Area

| Time  | Height   | Area        | Area%  |
|-------|----------|-------------|--------|
| 17.02 | 81228040 | 53167728.00 | 100.00 |

123-99

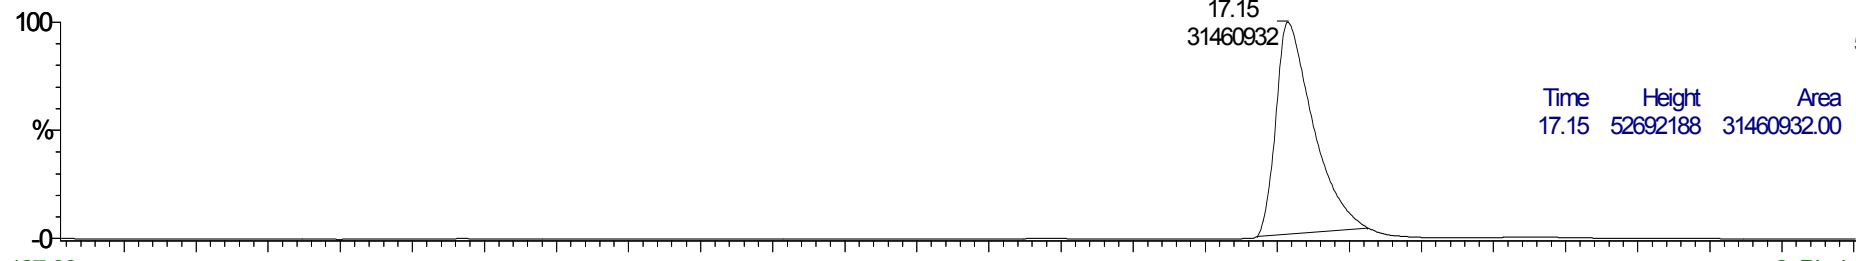

2: Diode Array  
TIC  
5.39e7  
Area

| Time  | Height   | Area        | Area%  |
|-------|----------|-------------|--------|
| 17.15 | 52692188 | 31460932.00 | 100.00 |

127-99

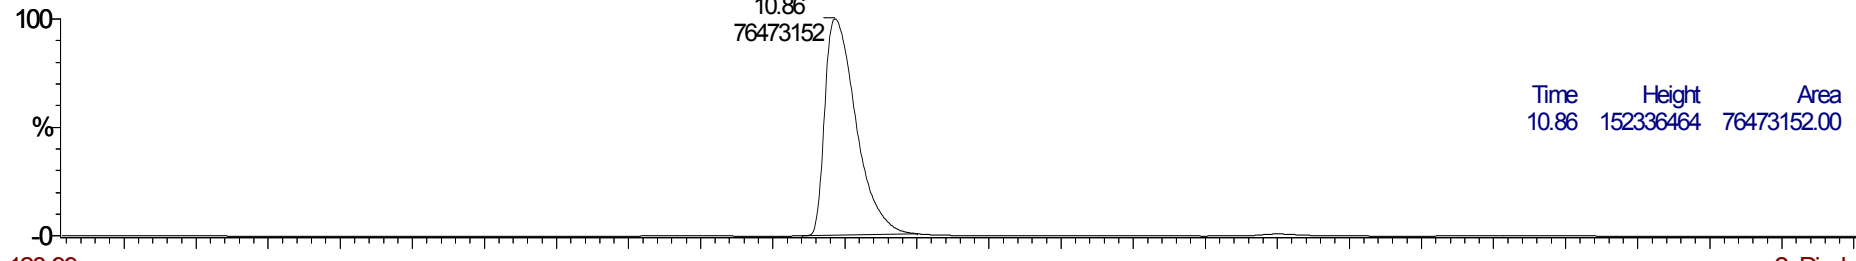

2: Diode Array  
TIC  
1.53e8  
Area

| Time  | Height    | Area        | Area%  |
|-------|-----------|-------------|--------|
| 10.86 | 152336464 | 76473152.00 | 100.00 |

128-99

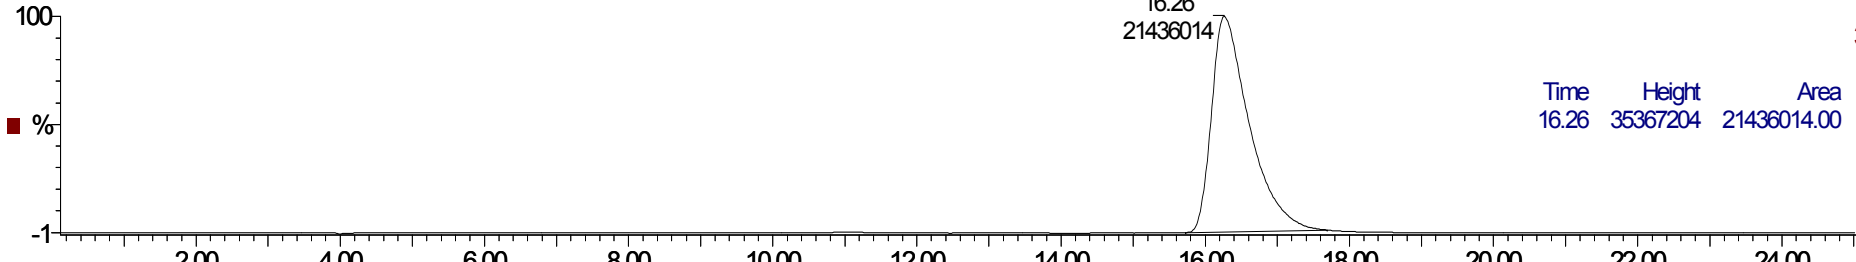

2: Diode Array  
TIC  
3.55e7  
Area

| Time  | Height   | Area        | Area%  |
|-------|----------|-------------|--------|
| 16.26 | 35367204 | 21436014.00 | 100.00 |

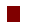

426

1-3-1 696 (11.713)

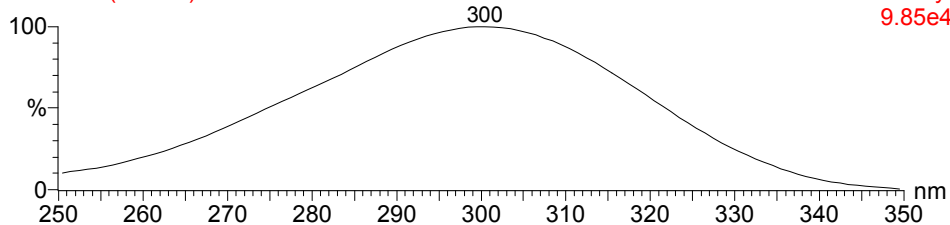

2: Diode Array  
9.85e4

426

1-3-1 573 (11.764)

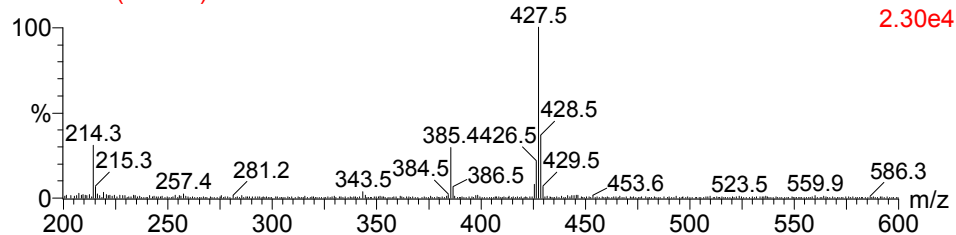

1: Scan AP+  
2.30e4

408

1-3-2 916 (15.368)

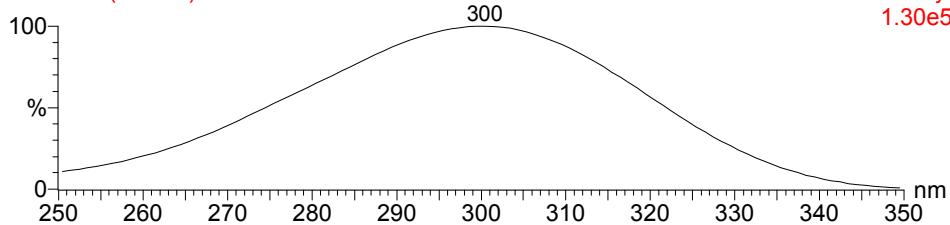

2: Diode Array  
1.30e5

408

1-3-2 836 (15.353)

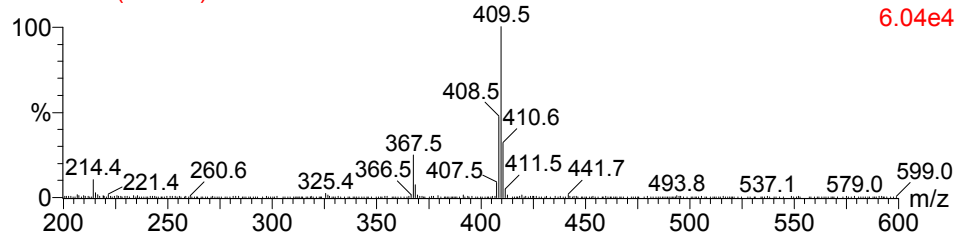

1: Scan AP+  
6.04e4

444

1-3-7 451 (7.627)

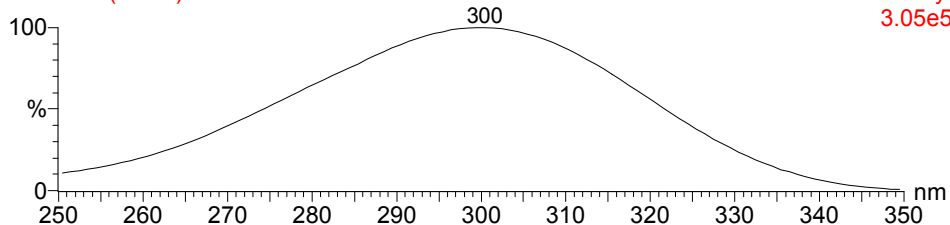

2: Diode Array  
3.05e5

444

1-3-7 417 (7.671)

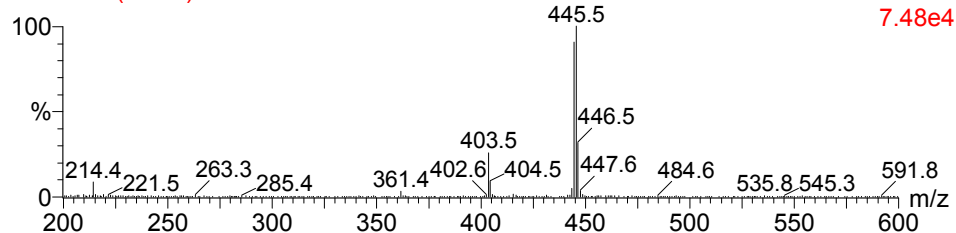

1: Scan AP+  
7.48e4

390

2-3-2 1174 (19.672)

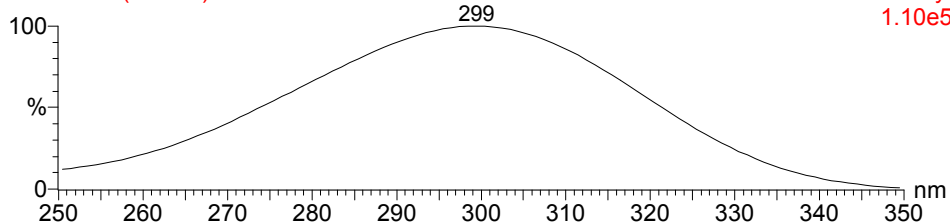

2: Diode Array  
1.10e5

390

2-3-2 1089 (19.991)

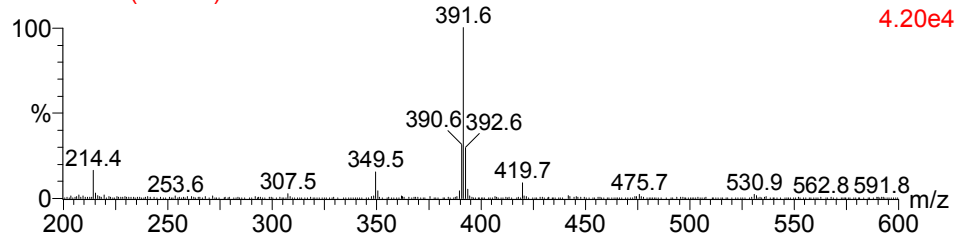

1: Scan AP+  
4.20e4

408

2-3-3 986 (16.535)

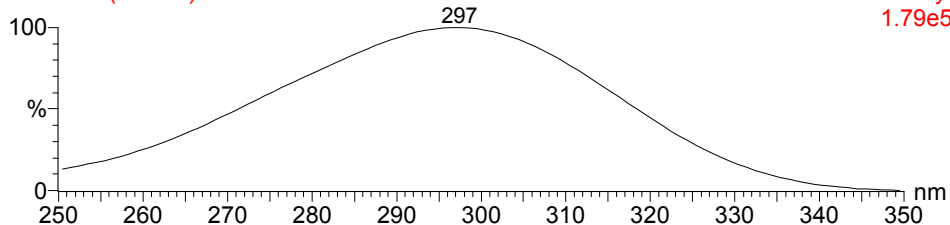

2: Diode Array  
1.79e5

408

2-3-3 902 (16.563)

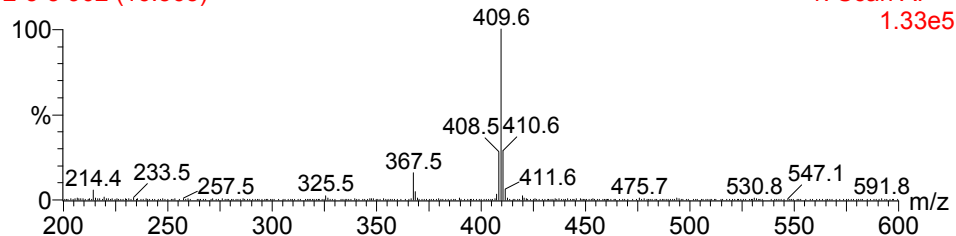

1: Scan AP+  
1.33e5

1-3-1

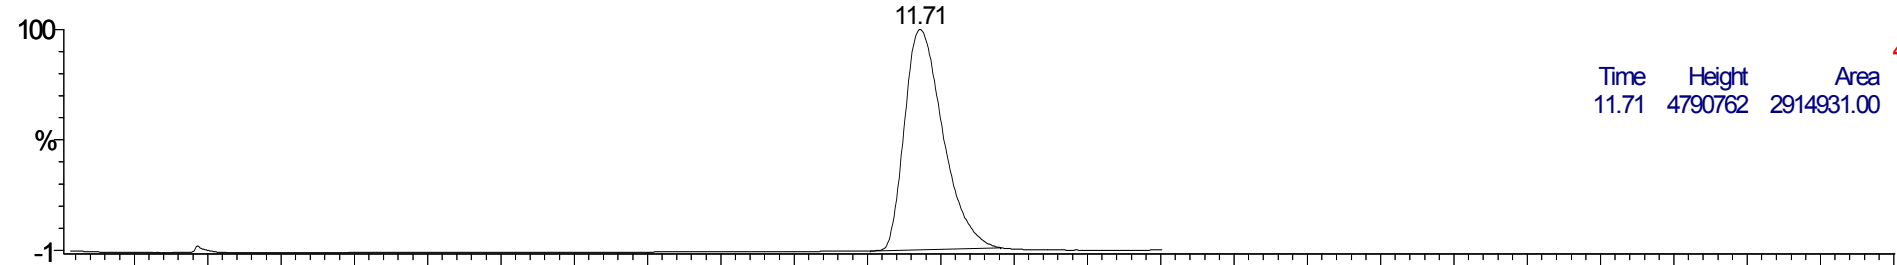

2: Diode Array  
TIC  
4.80e6

| Time  | Height  | Area       | Area%  |
|-------|---------|------------|--------|
| 11.71 | 4790762 | 2914931.00 | 100.00 |

1-3-2

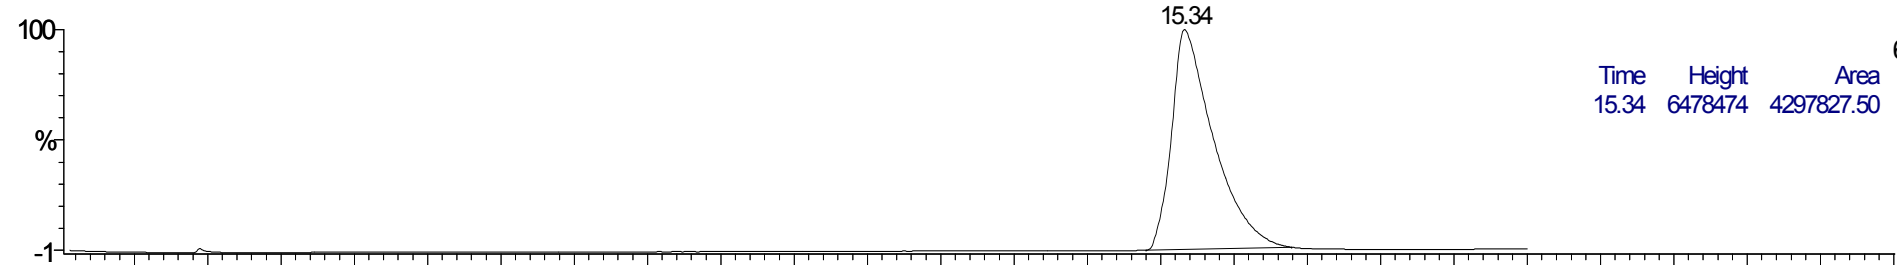

2: Diode Array  
TIC  
6.50e6

| Time  | Height  | Area       | Area%  |
|-------|---------|------------|--------|
| 15.34 | 6478474 | 4297827.50 | 100.00 |

1-3-7

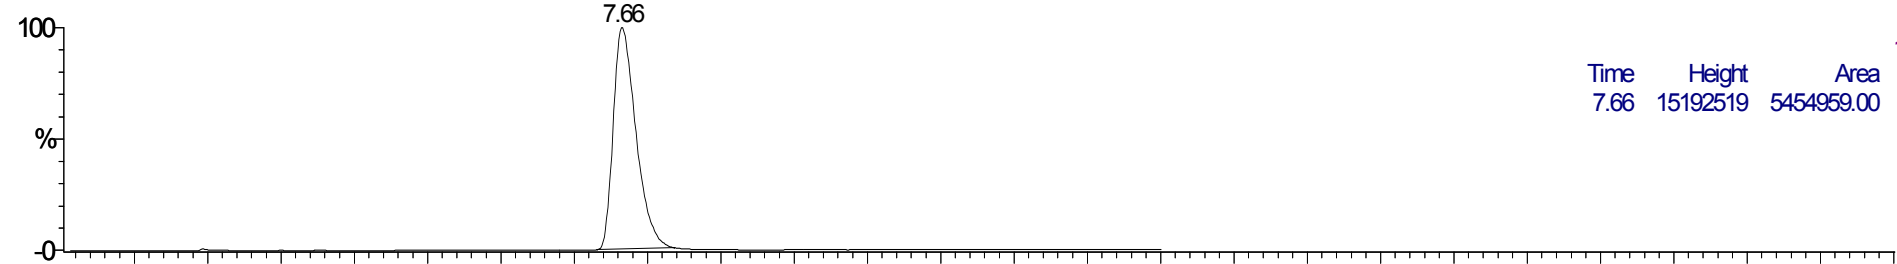

2: Diode Array  
TIC  
1.53e7

| Time | Height   | Area       | Area%  |
|------|----------|------------|--------|
| 7.66 | 15192519 | 5454959.00 | 100.00 |

2-3-2

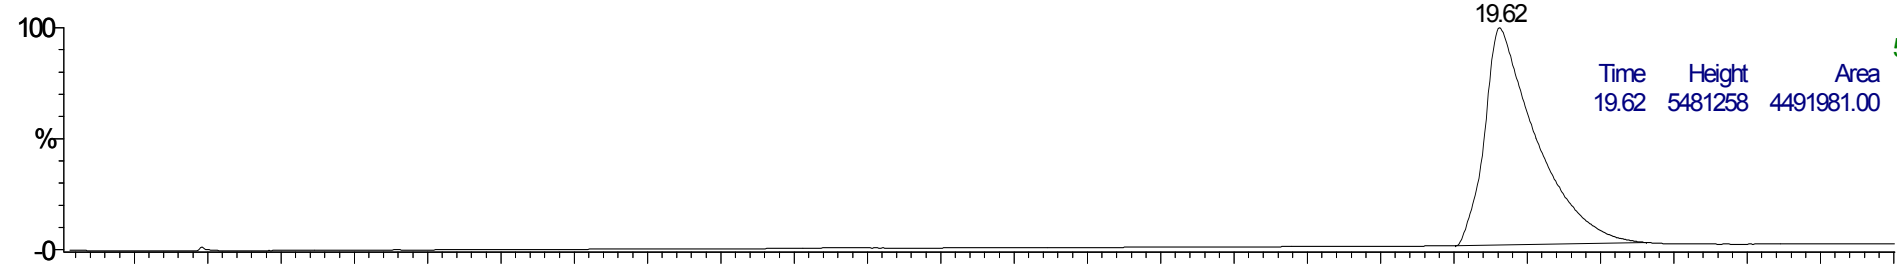

2: Diode Array  
TIC  
5.60e6

| Time  | Height  | Area       | Area%  |
|-------|---------|------------|--------|
| 19.62 | 5481258 | 4491981.00 | 100.00 |

2-3-3

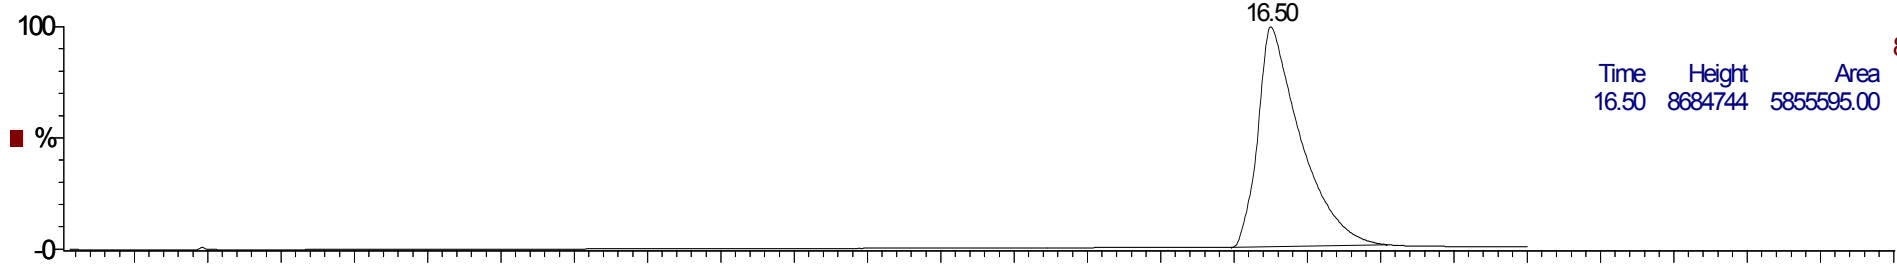

2: Diode Array  
TIC  
8.78e6

| Time  | Height  | Area       | Area%  |
|-------|---------|------------|--------|
| 16.50 | 8684744 | 5855595.00 | 100.00 |

■ %

Time

462

1-4-1 446 (7.535)

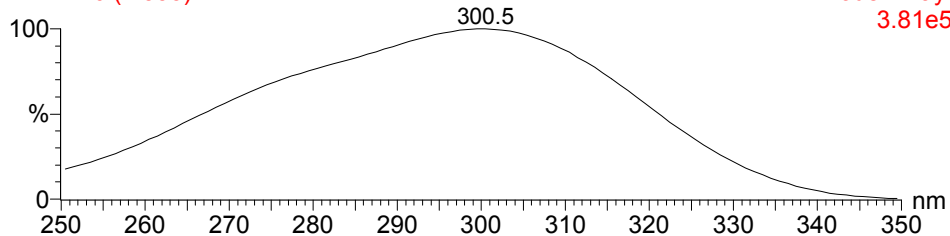

462

2: Diode Array 1-4-1 412 (7.579)  
3.81e5

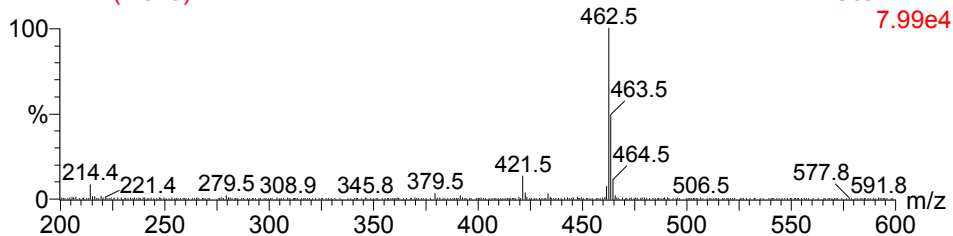

1: Scan AP+  
7.99e4

444

1-4-2 555 (9.350)

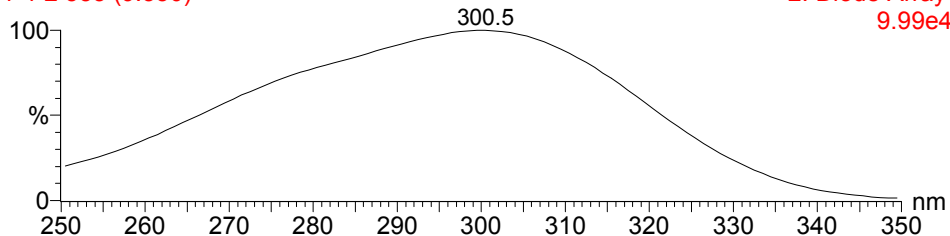

444

2: Diode Array 1-4-2 513 (9.430)  
9.99e4

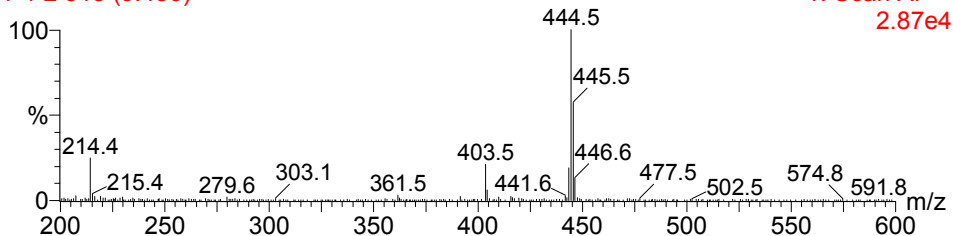

1: Scan AP+  
2.87e4

480

1-4-7 330 (5.613)

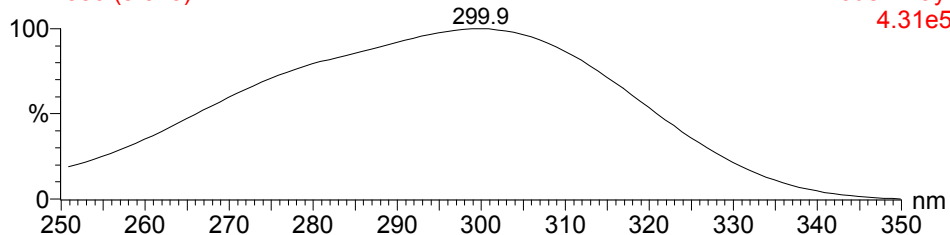

480

2: Diode Array 1-4-7 309 (5.690)  
4.31e5

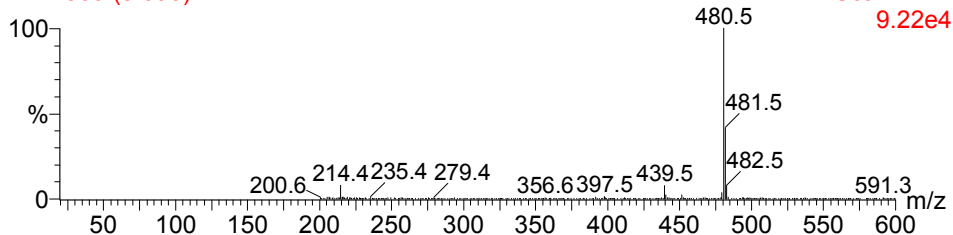

1: Scan AP+  
9.22e4

426

2-4-2 702 (11.802)

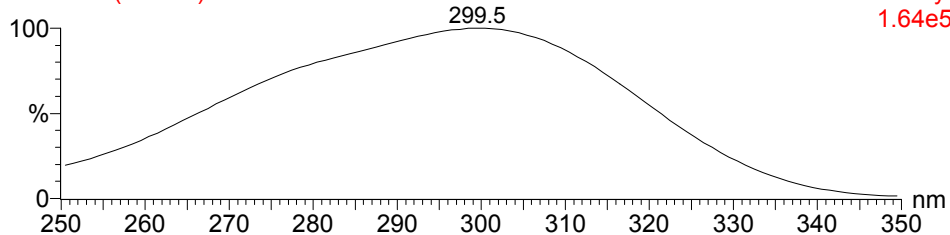

426

2: Diode Array 2-4-2 643 (11.814)  
1.64e5

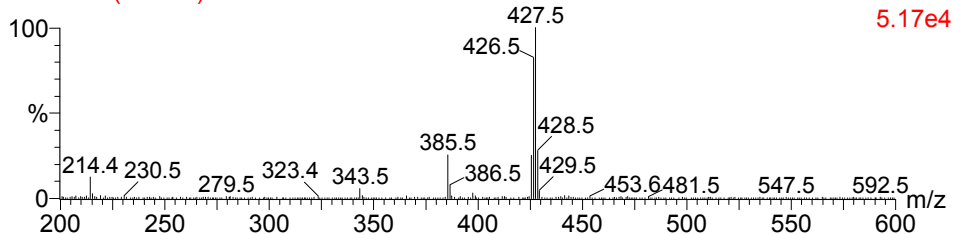

1: Scan AP+  
5.17e4

444

2-4-3 719 (12.085)

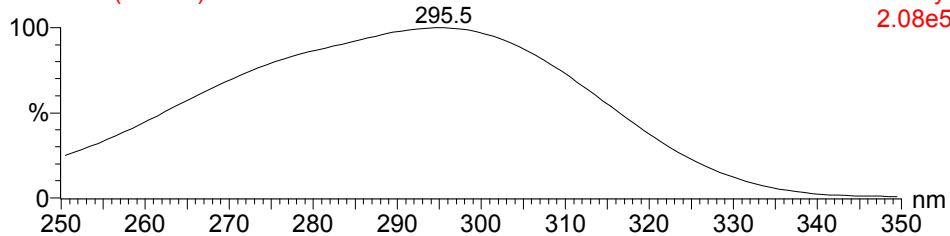

444

2: Diode Array 2-4-3 659 (12.108)  
2.08e5

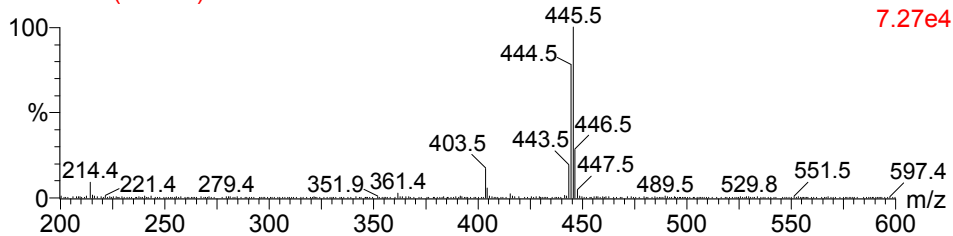

1: Scan AP+  
7.27e4

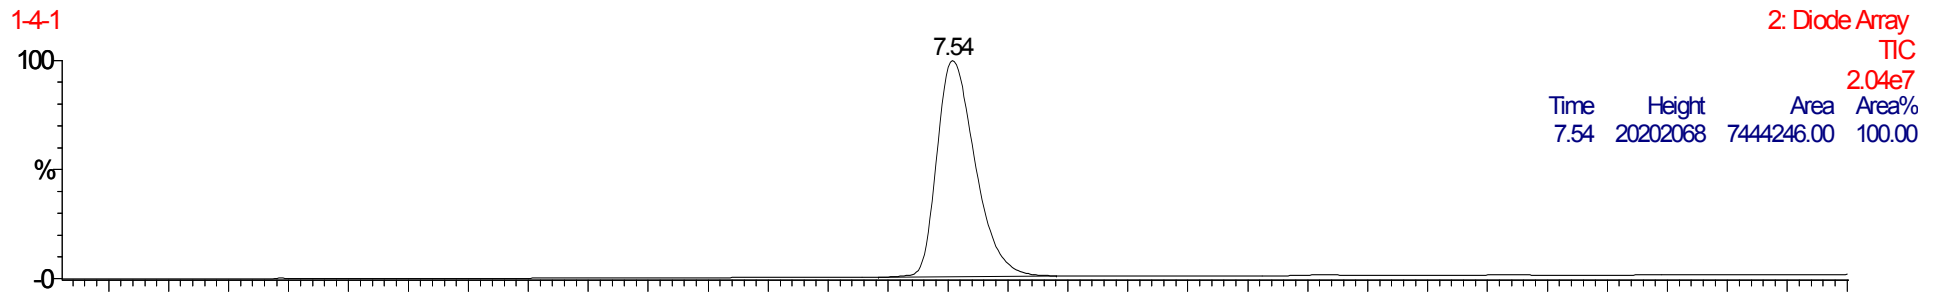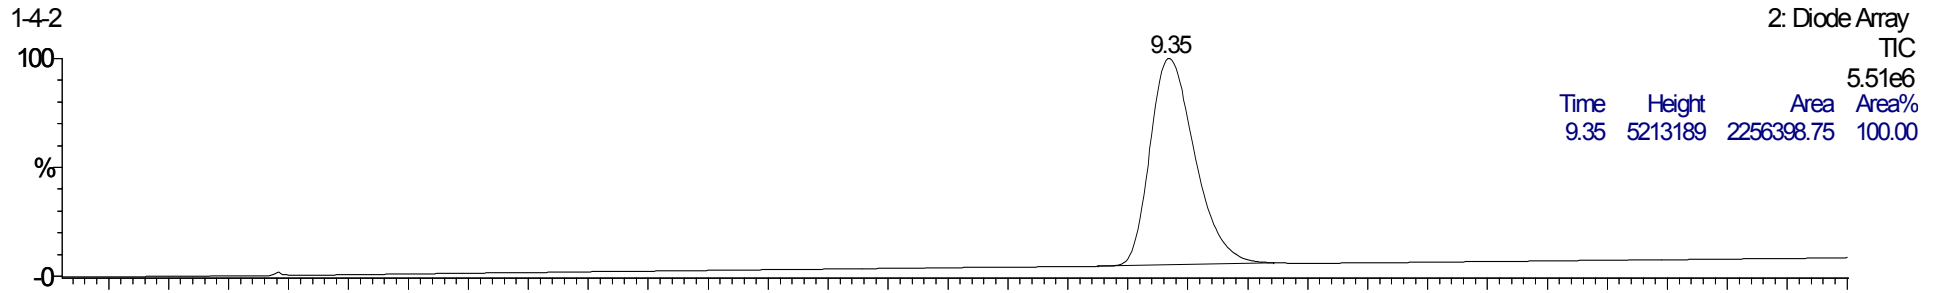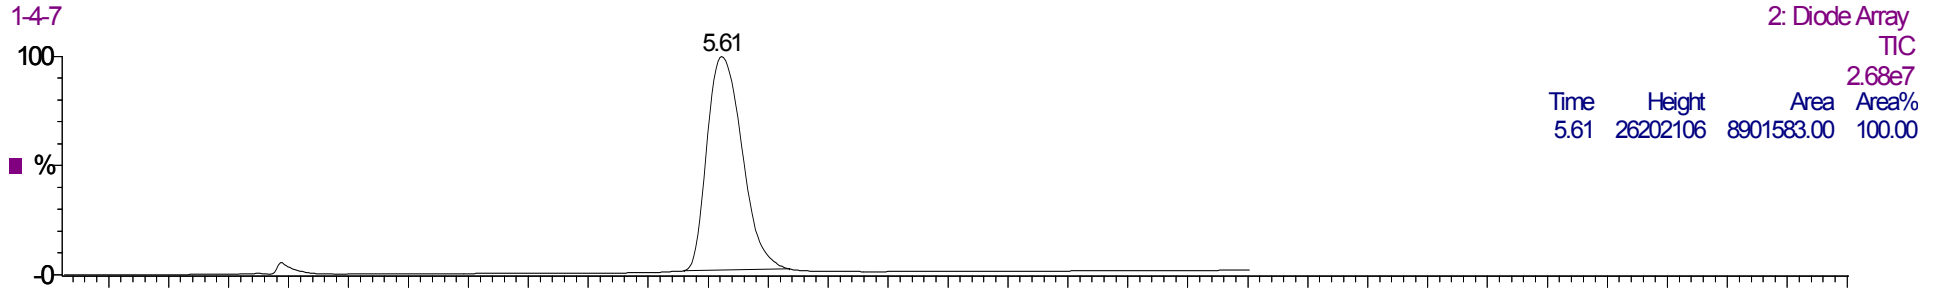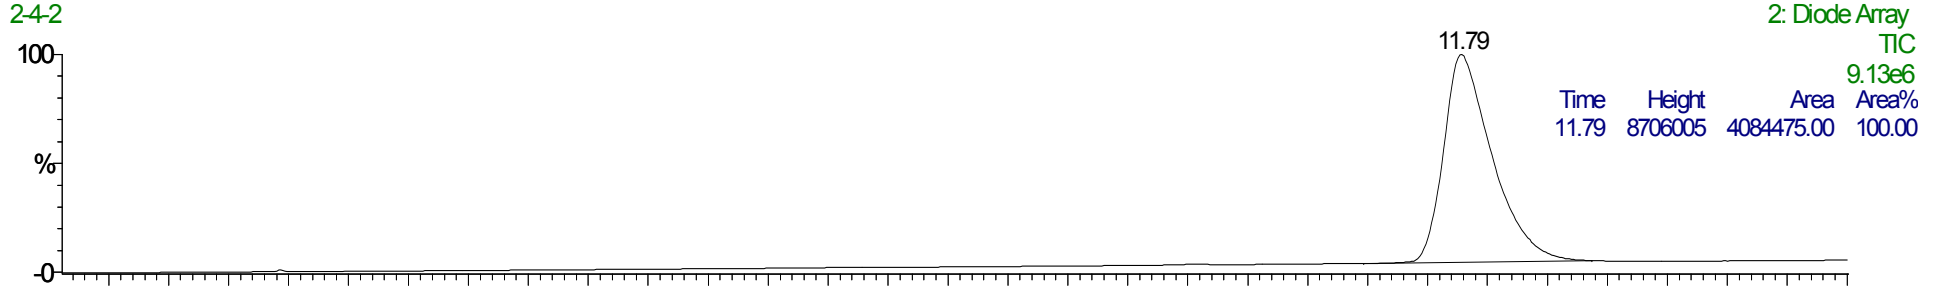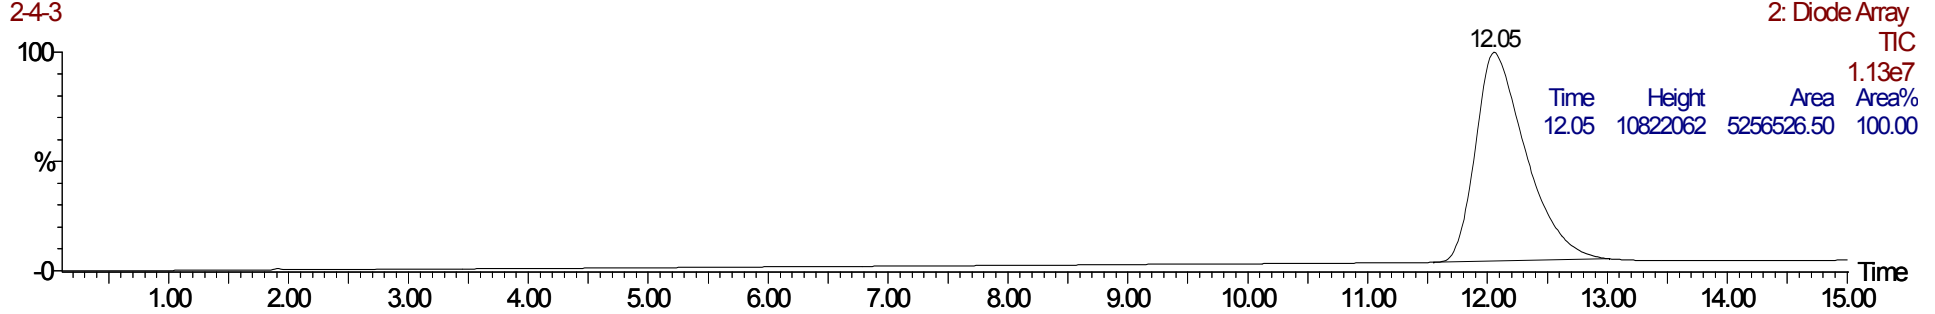



444

1-5-1 506 (8.533)

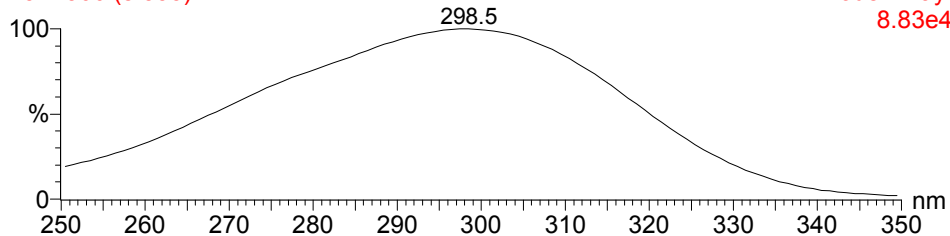

2: Diode Array 1-5-1 465 (8.551)

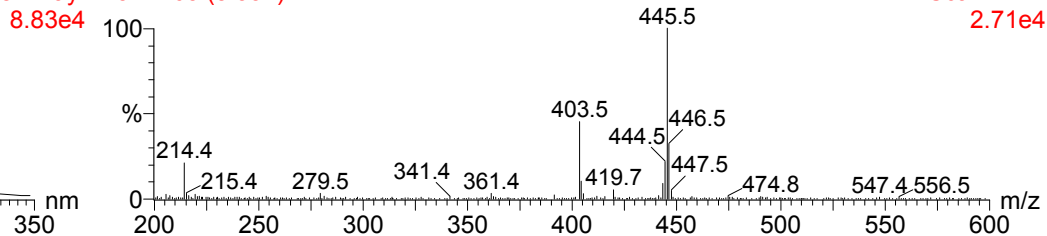

1: Scan AP+ 2.71e4

426

1-5-2 676 (11.367)

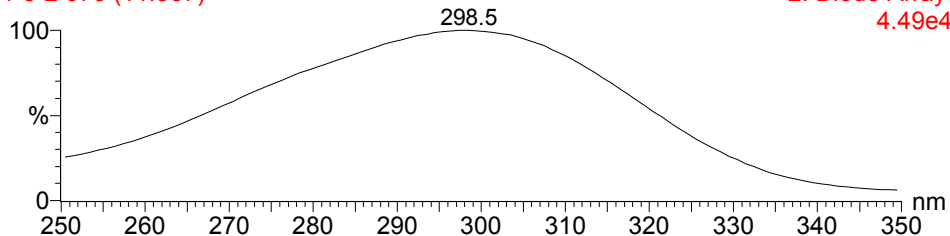

2: Diode Array 1-5-2 620 (11.392)

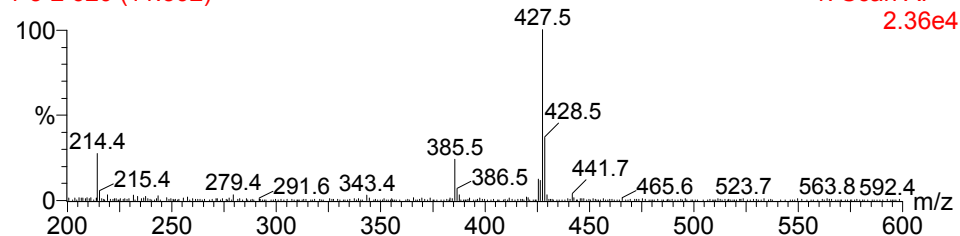

1: Scan AP+ 2.36e4

444

1-5-3 573 (9.663)

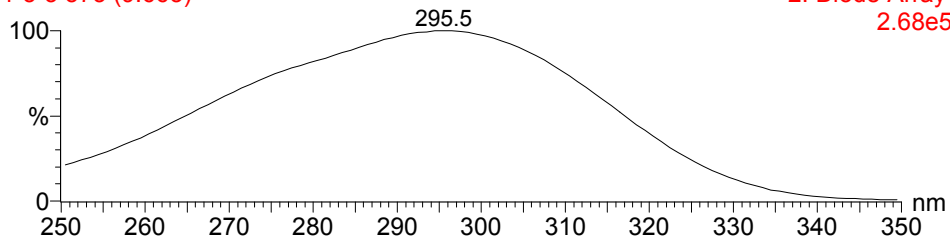

2: Diode Array 1-5-3 527 (9.687)

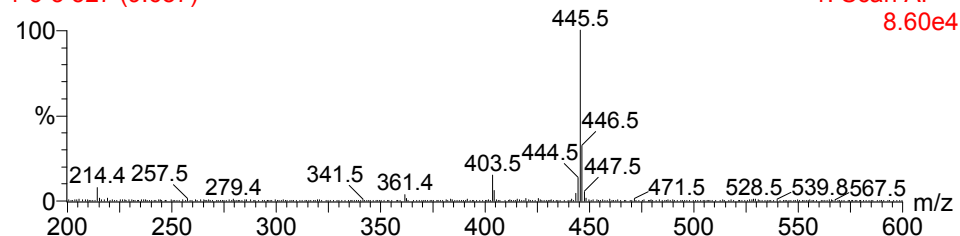

1: Scan AP+ 8.60e4

462

1-5-7 347 (5.893)

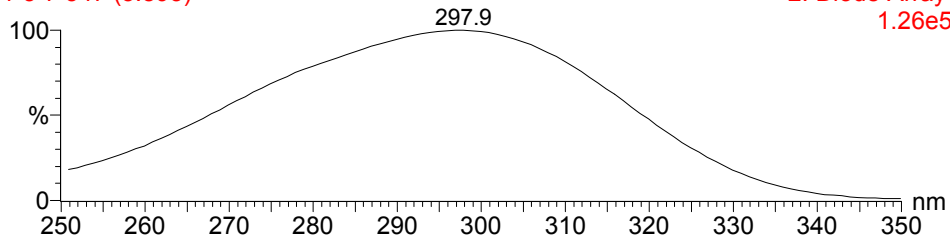

2: Diode Array 1-5-7 323 (5.947)

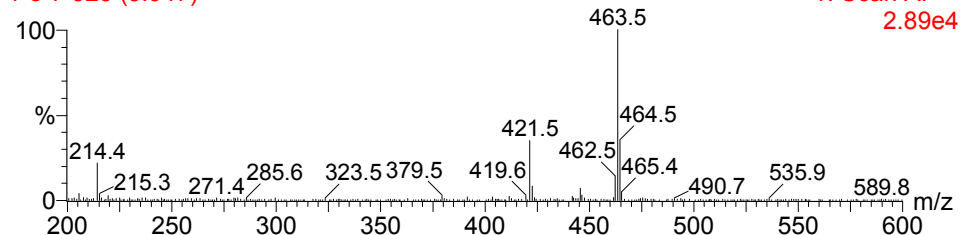

1: Scan AP+ 2.89e4

462

1-5-8 509 (8.597)

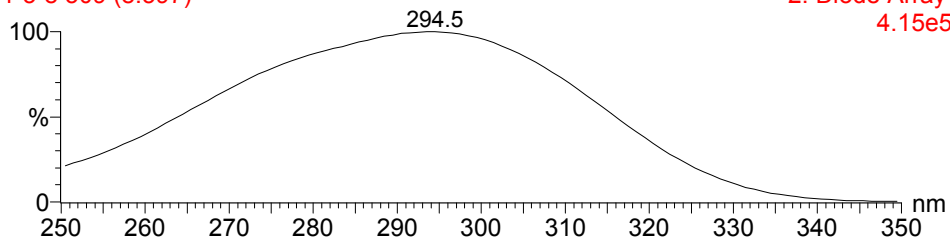

2: Diode Array 1-5-8 469 (8.624)

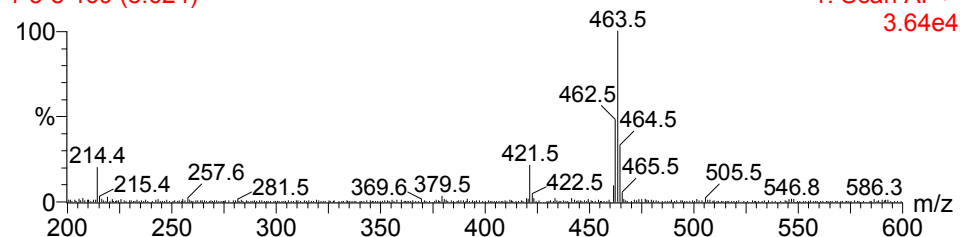

1: Scan AP+ 3.64e4

1-5-1

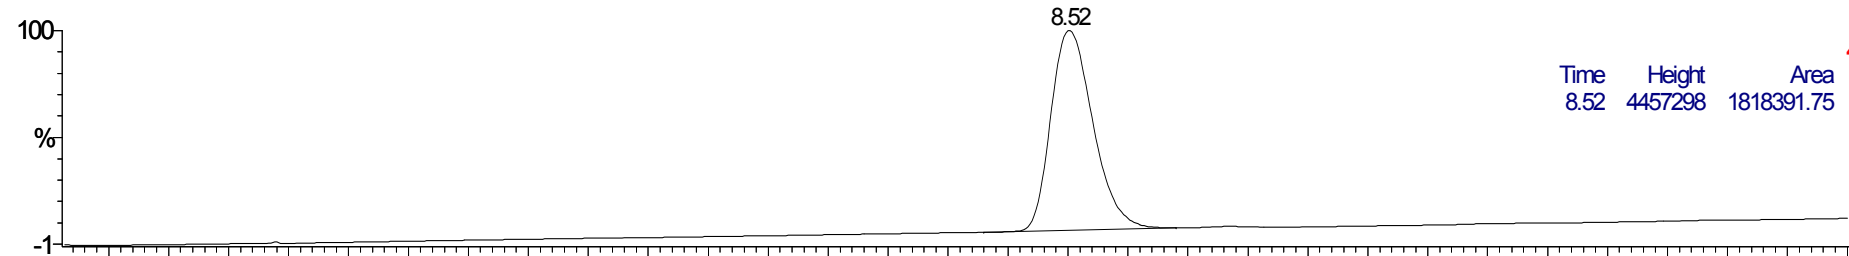

2: Diode Array  
TIC  
4.77e6

| Time | Height  | Area       | Area%  |
|------|---------|------------|--------|
| 8.52 | 4457298 | 1818391.75 | 100.00 |

1-5-2

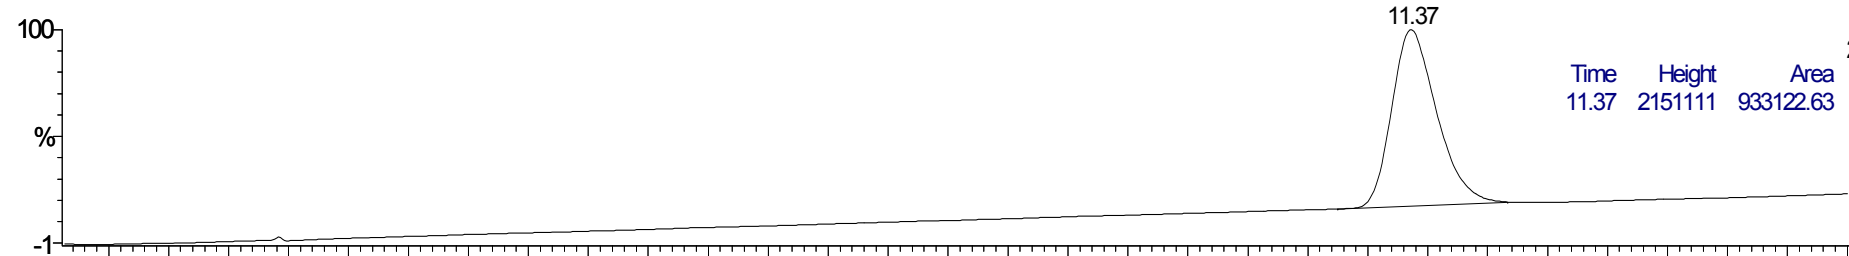

2: Diode Array  
TIC  
2.60e6

| Time  | Height  | Area      | Area%  |
|-------|---------|-----------|--------|
| 11.37 | 2151111 | 933122.63 | 100.00 |

1-5-3

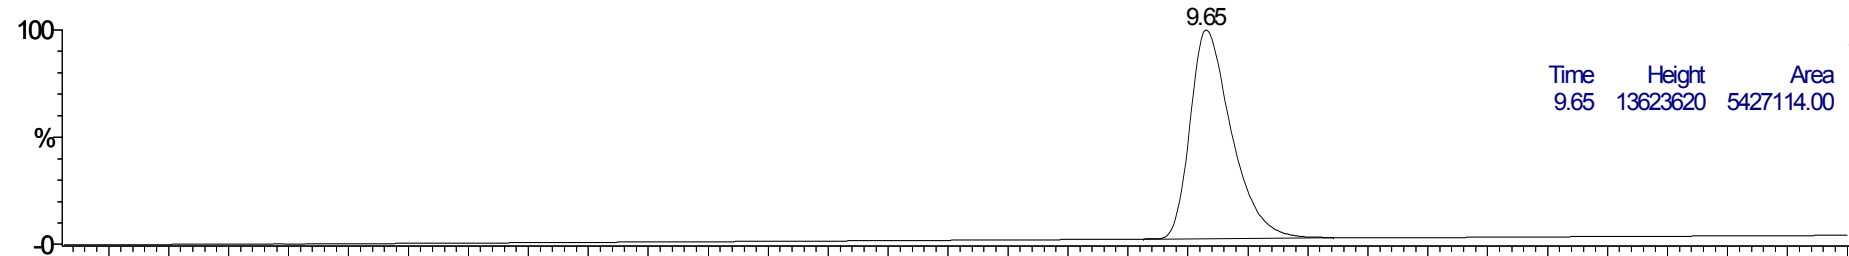

2: Diode Array  
TIC  
1.40e7

| Time | Height   | Area       | Area%  |
|------|----------|------------|--------|
| 9.65 | 13623620 | 5427114.00 | 100.00 |

1-5-7

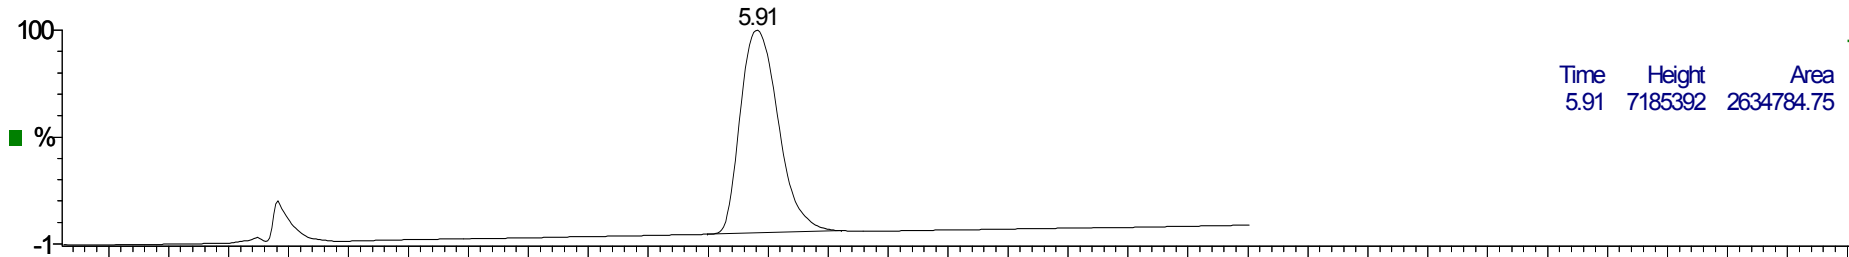

2: Diode Array  
TIC  
7.57e6

| Time | Height  | Area       | Area%  |
|------|---------|------------|--------|
| 5.91 | 7185392 | 2634784.75 | 100.00 |

1-5-8

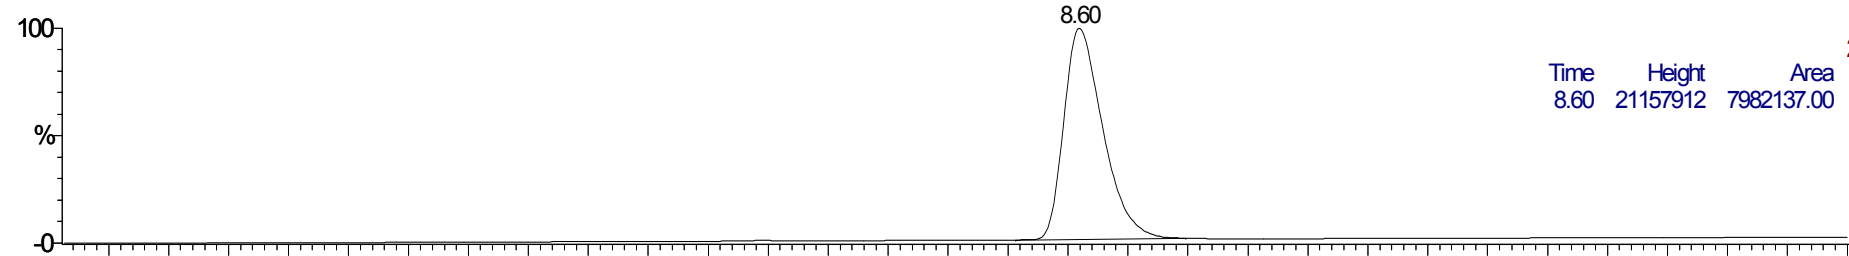

2: Diode Array  
TIC  
2.15e7

| Time | Height   | Area       | Area%  |
|------|----------|------------|--------|
| 8.60 | 21157912 | 7982137.00 | 100.00 |

Time

462

1-6-1 400 (6.775)

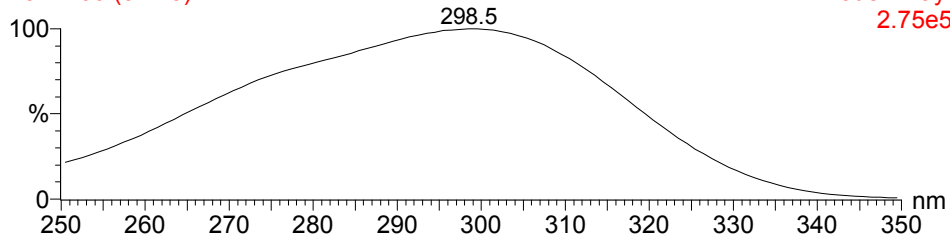

462

2: Diode Array 1-6-1 369 (6.791)

2.75e5

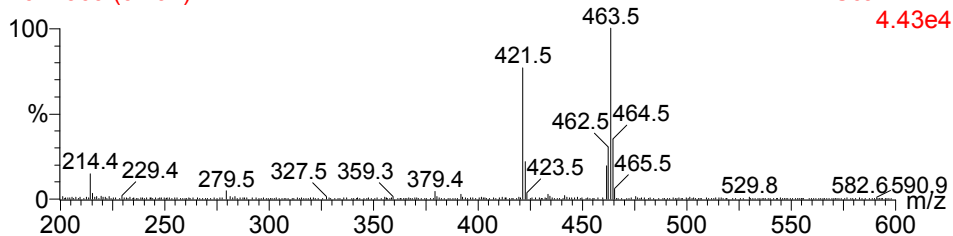

1: Scan AP+

4.43e4

444

1-6-2 505 (8.525)

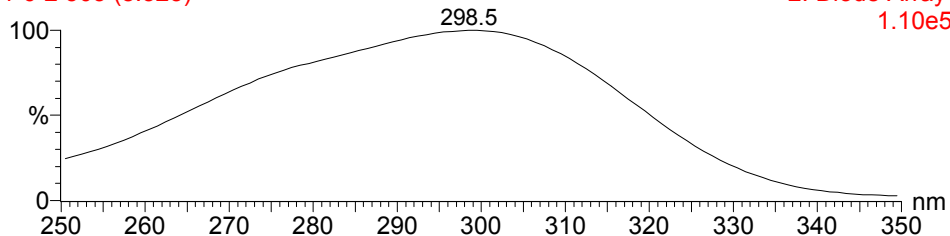

444

2: Diode Array 1-6-2 469 (8.624)

1.10e5

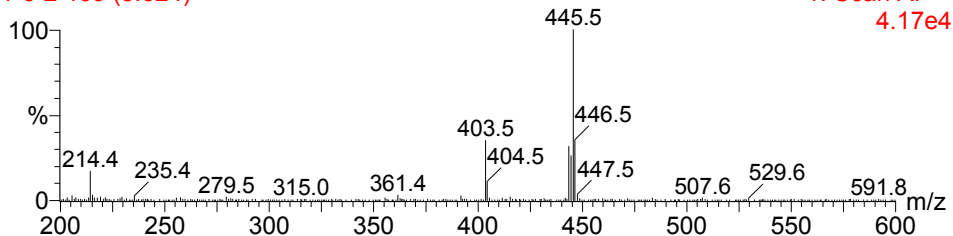

1: Scan AP+

4.17e4

462

1-6-3 530 (8.942)

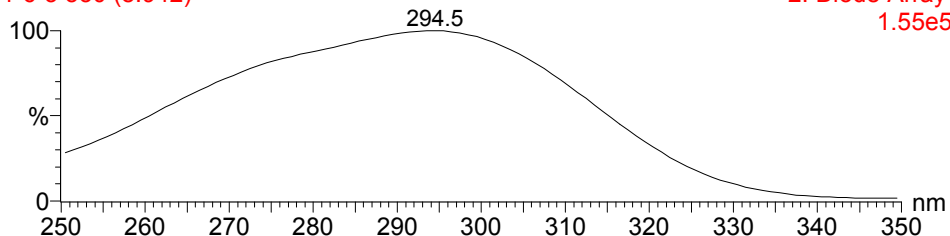

462

2: Diode Array 1-6-3 489 (8.991)

1.55e5

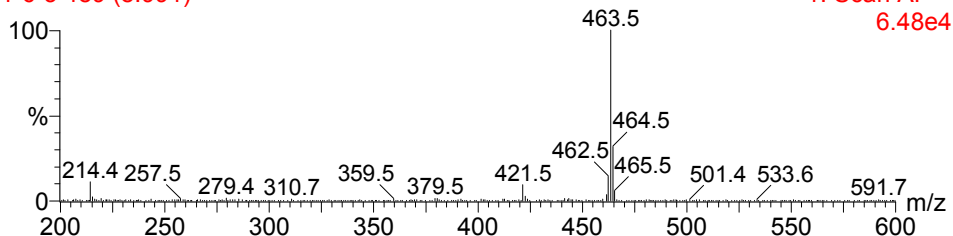

1: Scan AP+

6.48e4

480

1-6-7 294 (5.007)

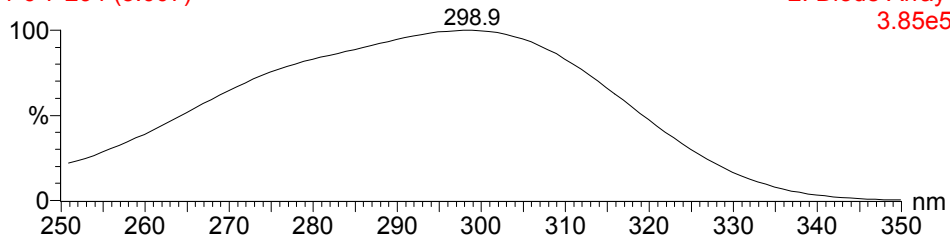

480

2: Diode Array 1-6-7 274 (5.049)

3.85e5

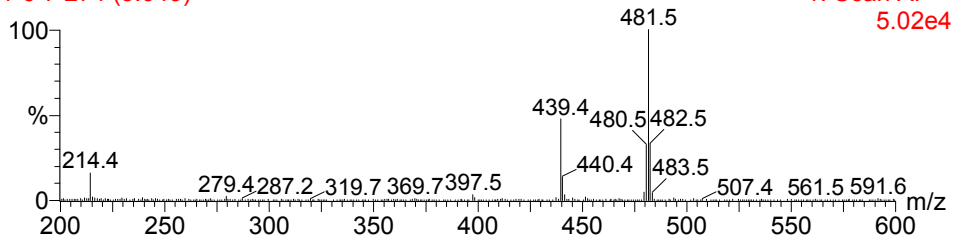

1: Scan AP+

5.02e4

480

1-6-8 474 (8.013)

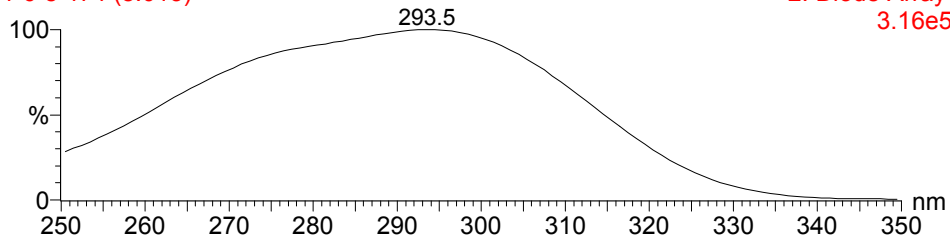

480

2: Diode Array 1-6-8 435 (8.001)

3.16e5

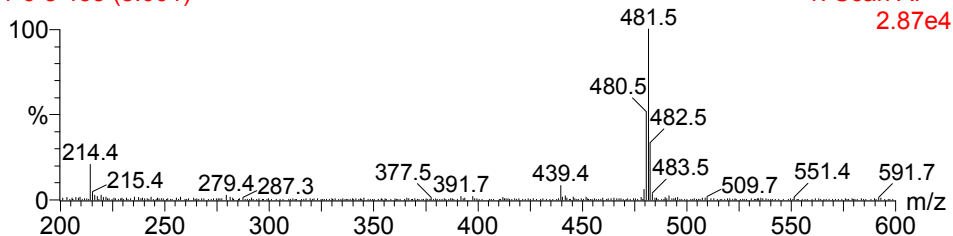

1: Scan AP+

2.87e4

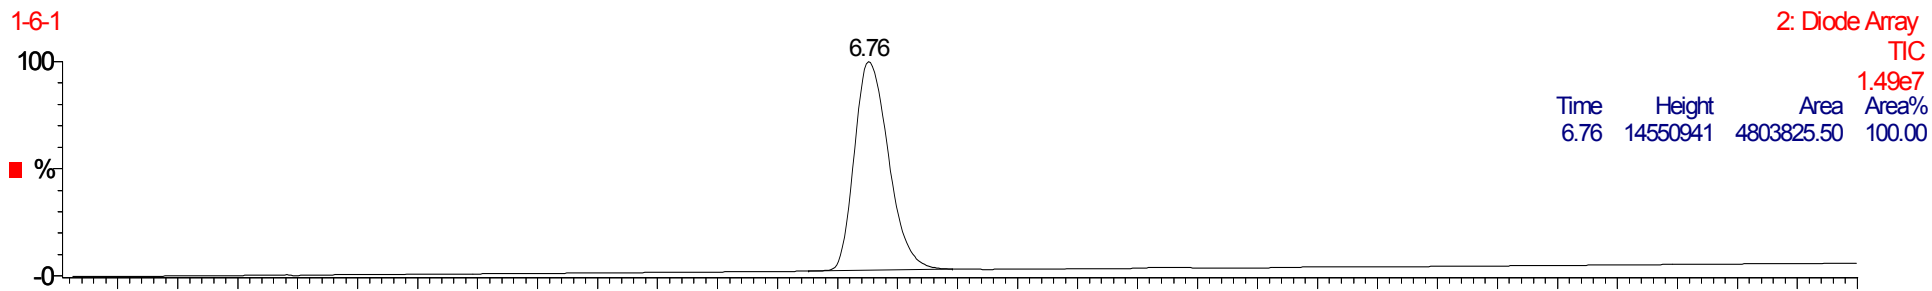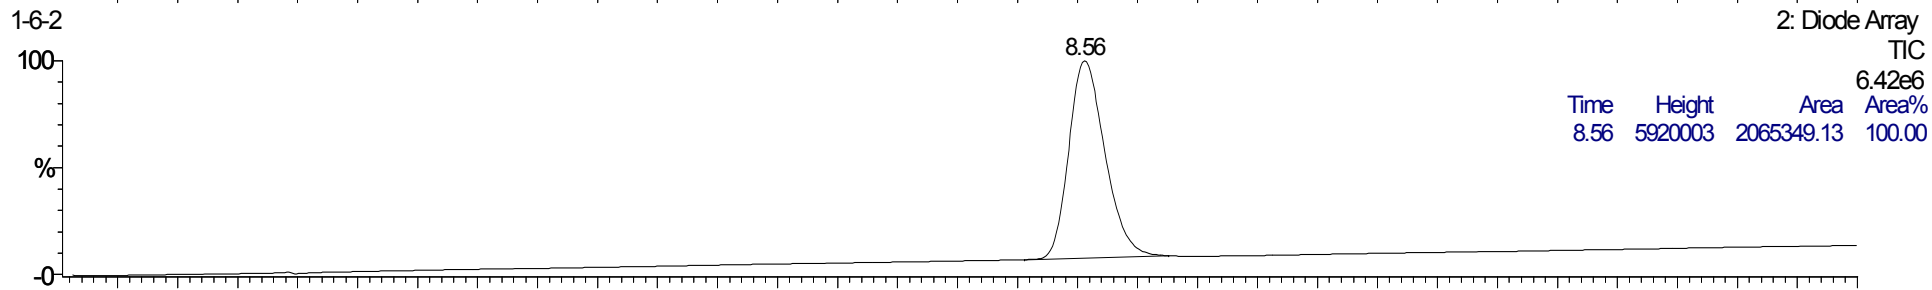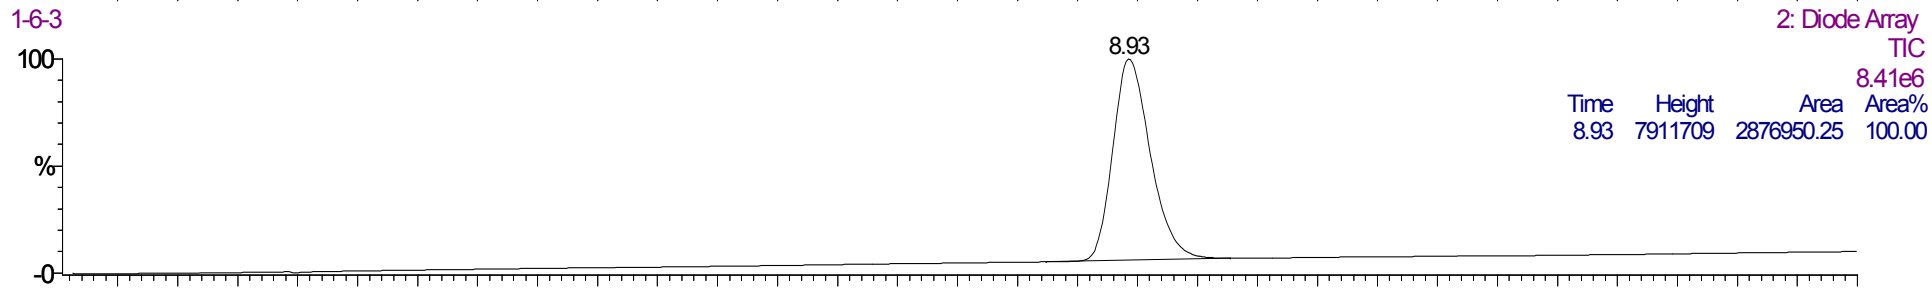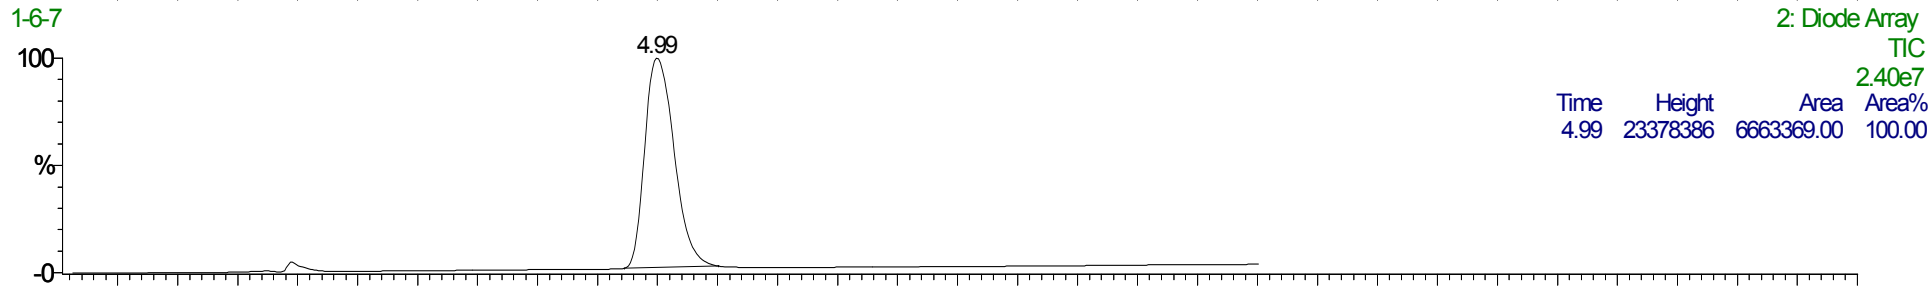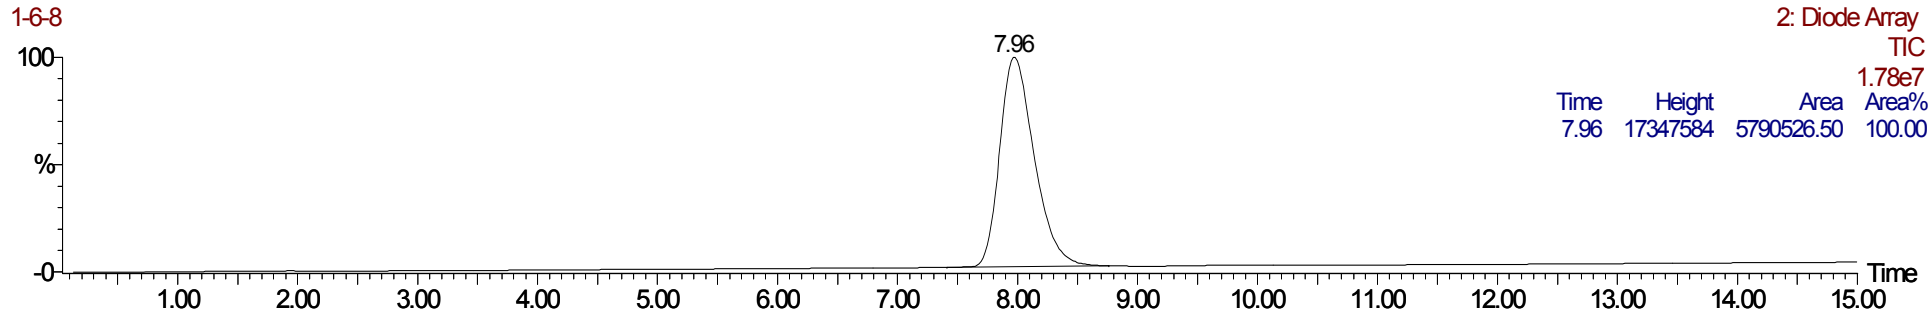

444

1-7-1 489 (8.252)

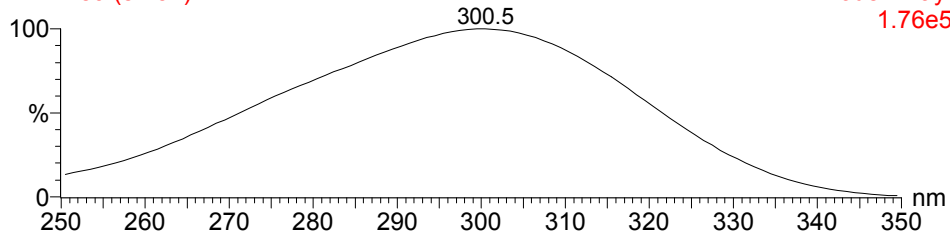

444

2: Diode Array 1-7-1 449 (8.257)

1.76e5

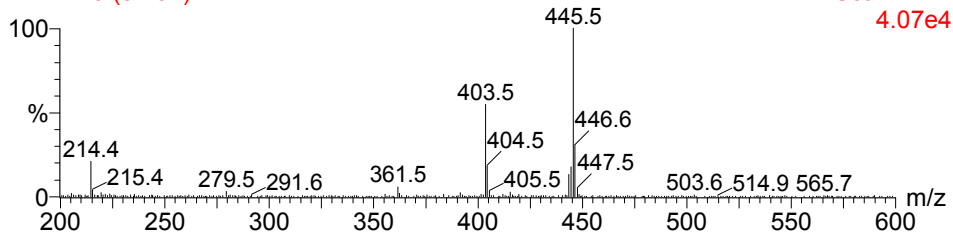

1: Scan AP+

4.07e4

426

1-7-2 624 (10.500)

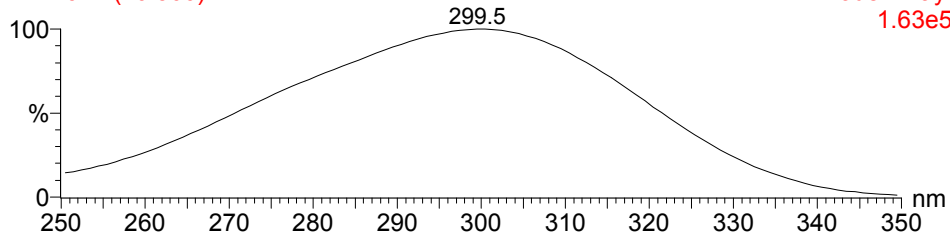

426

2: Diode Array 1-7-2 575 (10.567)

1.63e5

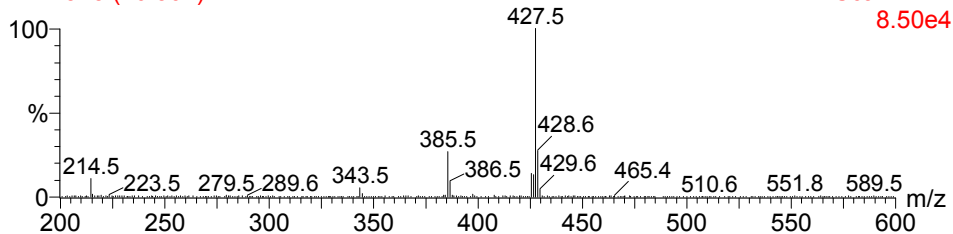

1: Scan AP+

8.50e4

444

1-7-3 646 (10.867)

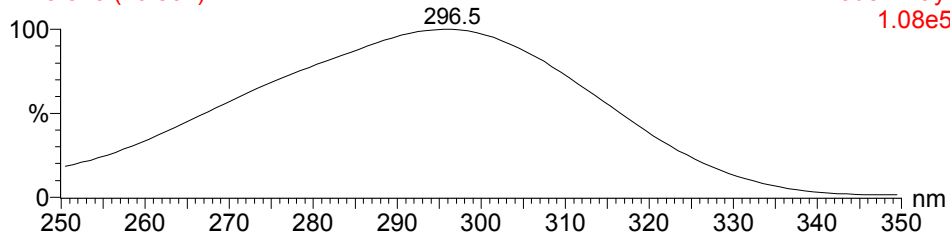

444

2: Diode Array 1-7-3 593 (10.897)

1.08e5

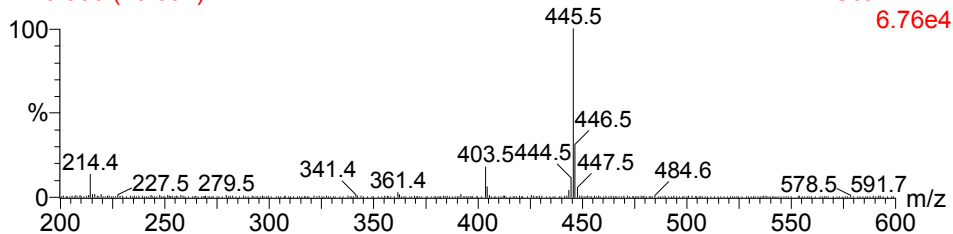

1: Scan AP+

6.76e4

462

1-7-7 350 (5.948)

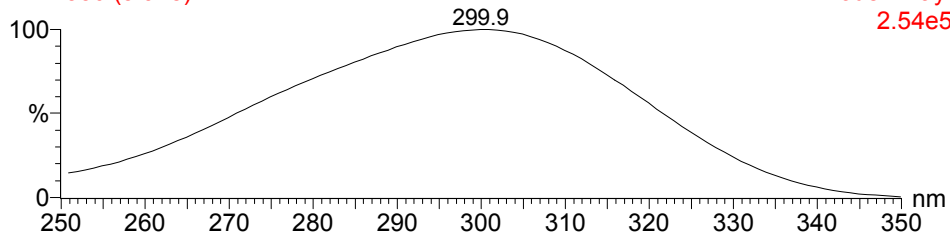

462

2: Diode Array 1-7-7 325 (5.984)

2.54e5

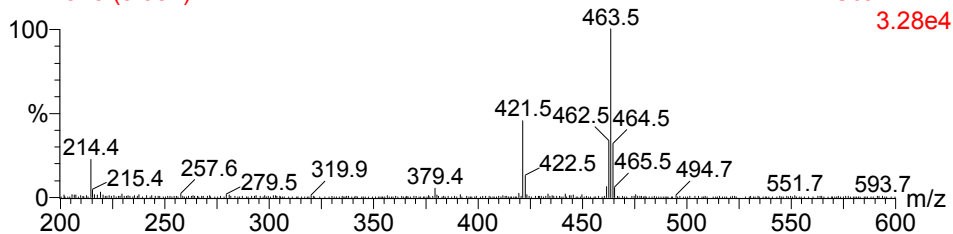

1: Scan AP+

3.28e4

462

1-7-8 565 (9.520)

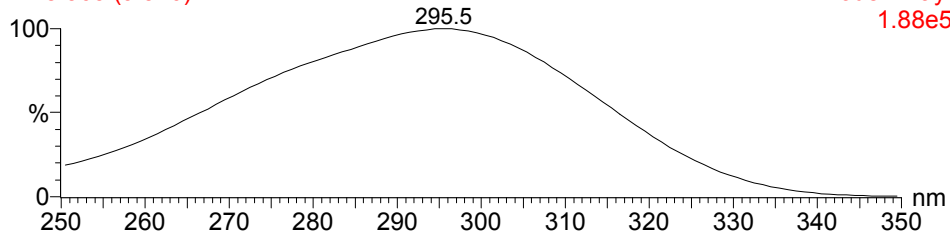

462

2: Diode Array 1-7-8 518 (9.522)

1.88e5

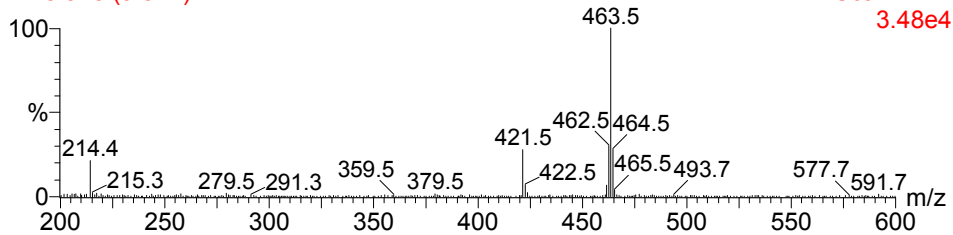

1: Scan AP+

3.48e4

1-7-1

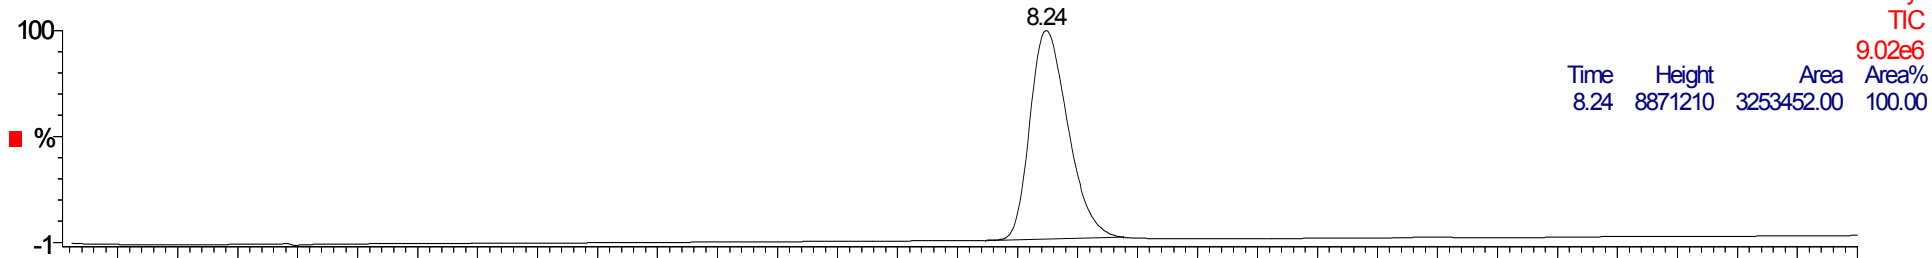

1-7-2

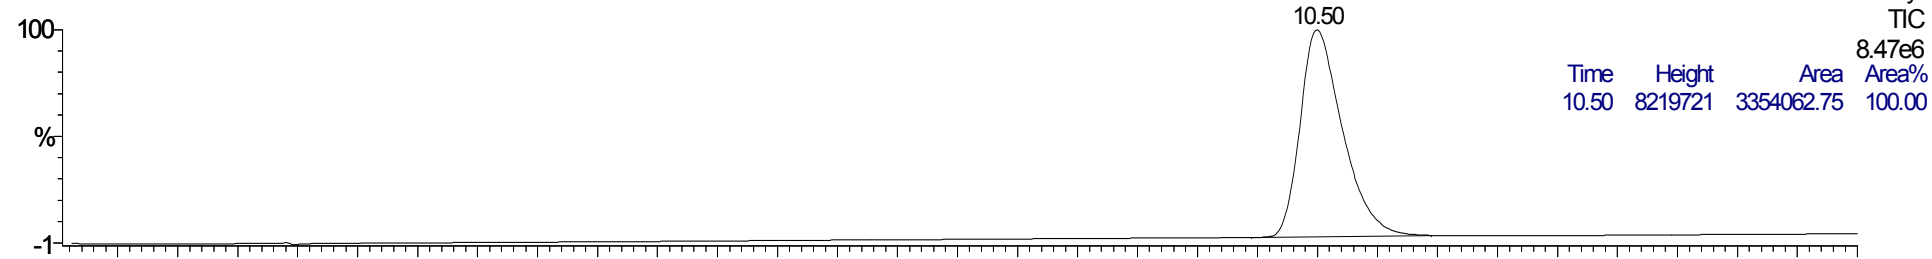

1-7-3

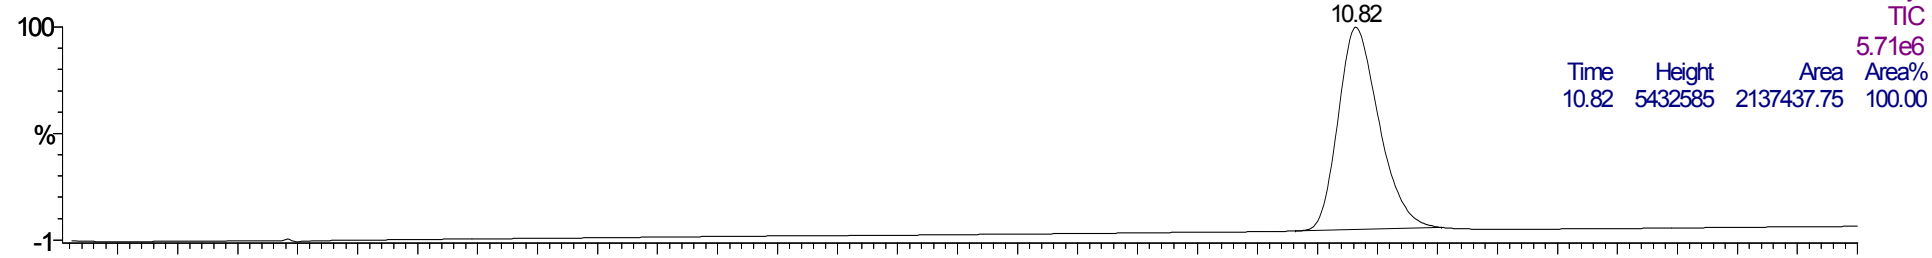

1-7-7

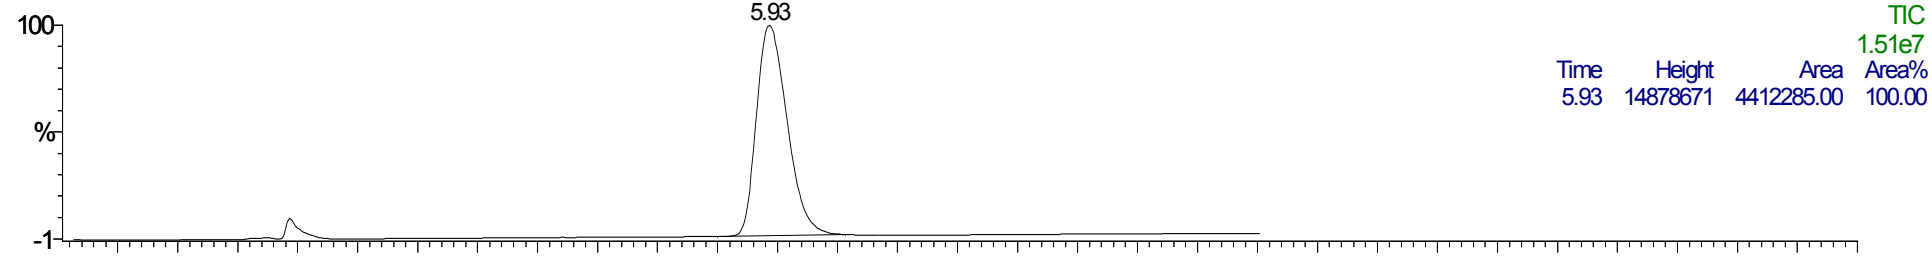

1-7-8

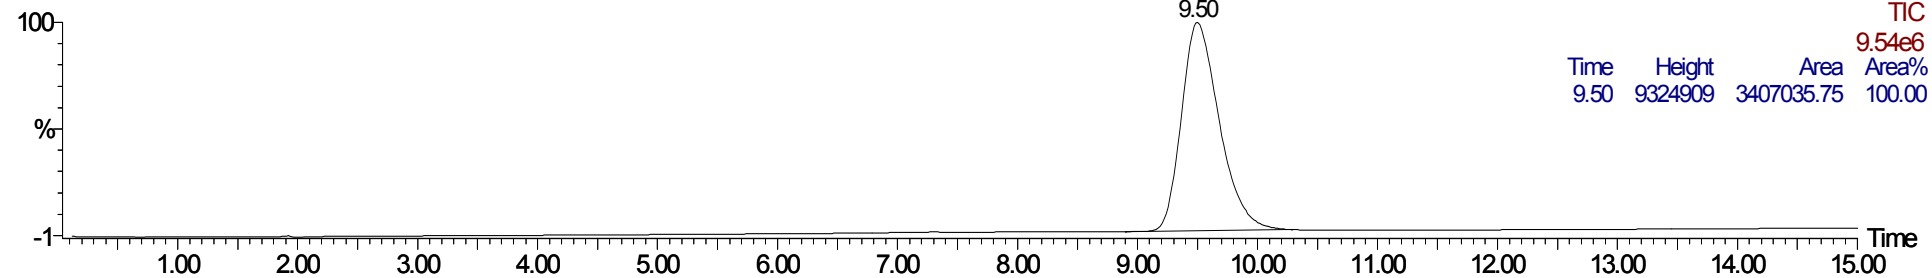

480

1-8-1 408 (6.913)

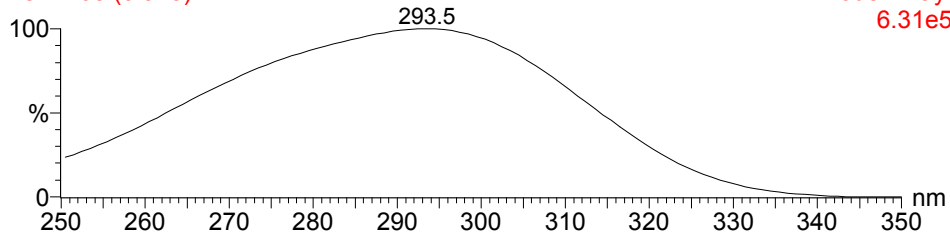

480

2: Diode Array 1-8-1 376 (6.919)

6.31e5

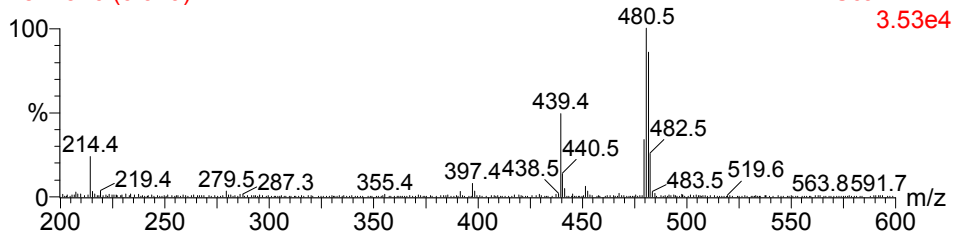

1: Scan AP+

3.53e4

462

1-8-2 471 (7.962)

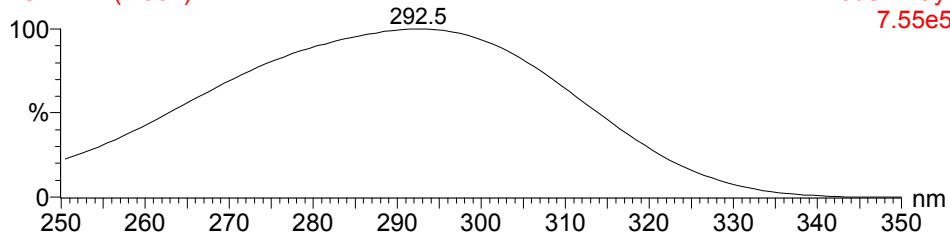

462

2: Diode Array 1-8-2 435 (8.001)

7.55e5

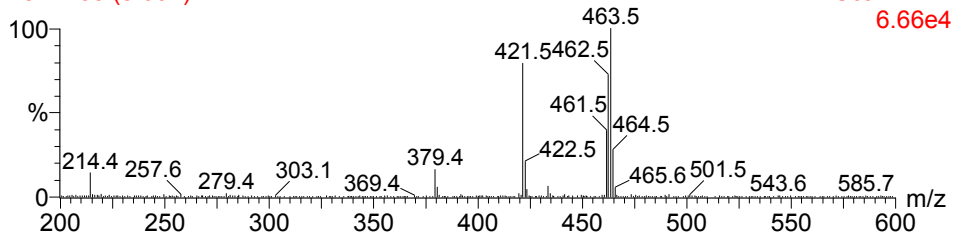

1: Scan AP+

6.66e4

480

1-8-3 467 (7.892)

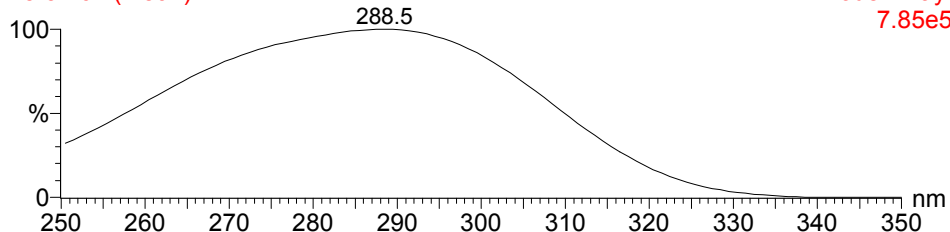

480

2: Diode Array 1-8-3 434 (7.983)

7.85e5

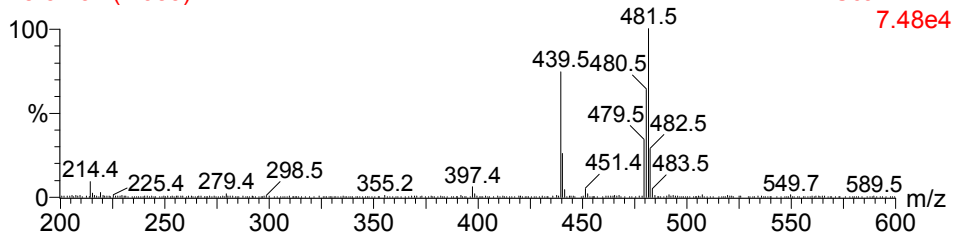

1: Scan AP+

7.48e4

498

1-8-7 314 (5.342)

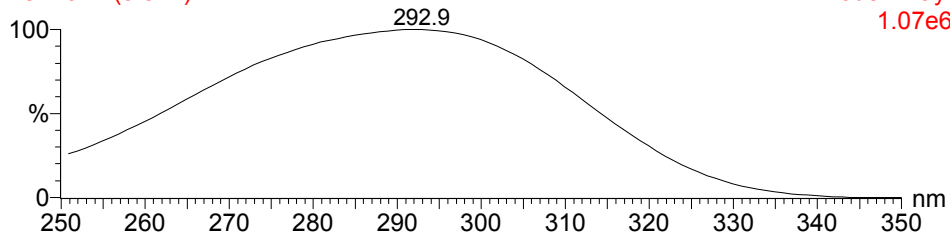

498

2: Diode Array 1-8-7 290 (5.342)

1.07e6

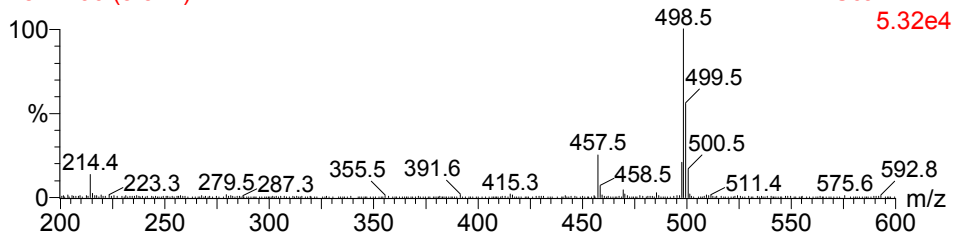

1: Scan AP+

5.32e4

498

1-8-8 461 (7.783)

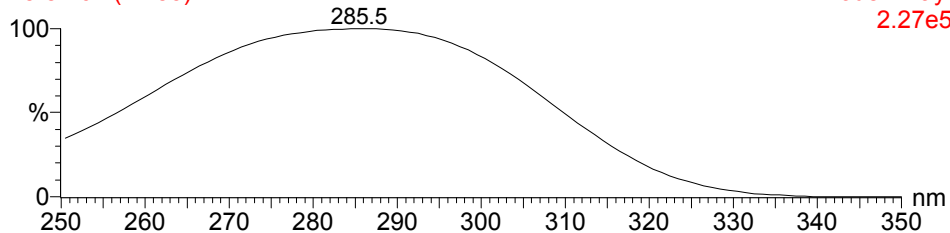

498

2: Diode Array 1-8-8 426 (7.836)

2.27e5

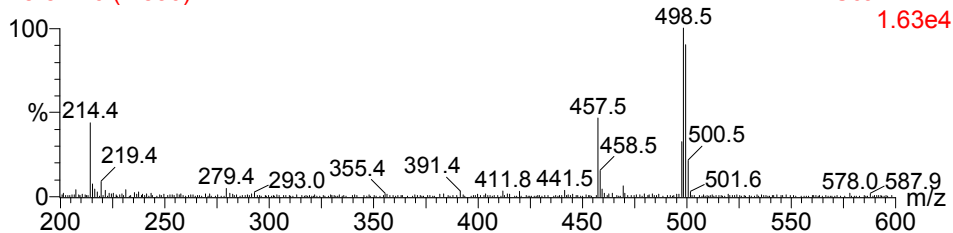

1: Scan AP+

1.63e4

1-8-1

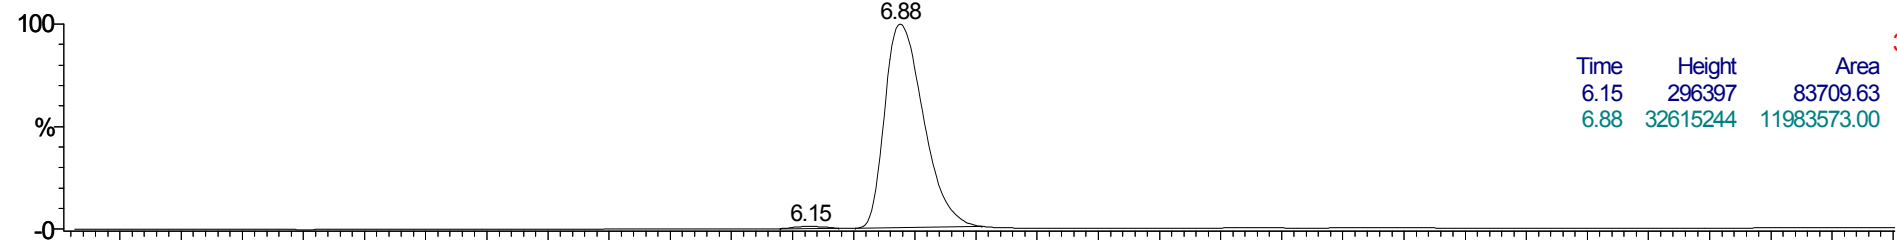

2: Diode Array  
TIC  
3.29e7

| Time | Height   | Area        | Area% |
|------|----------|-------------|-------|
| 6.15 | 296397   | 83709.63    | 0.69  |
| 6.88 | 32615244 | 11983573.00 | 99.31 |

1-8-2

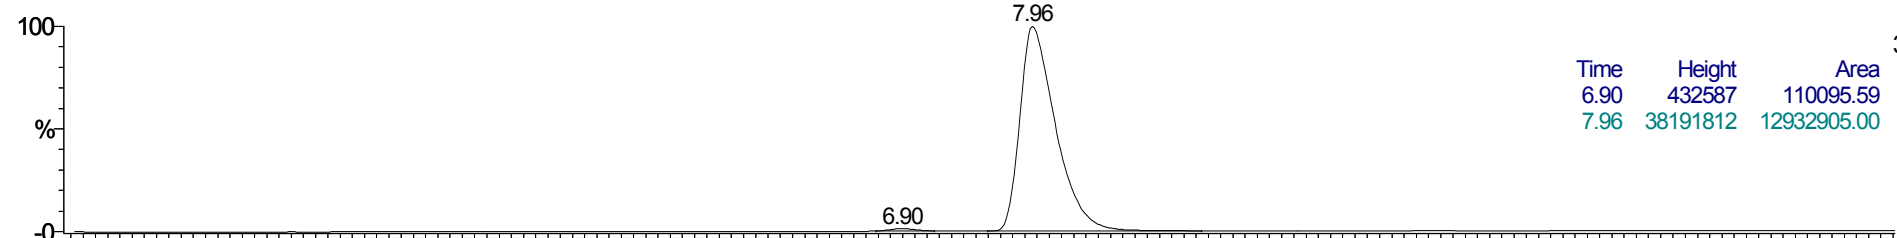

2: Diode Array  
TIC  
3.83e7

| Time | Height   | Area        | Area% |
|------|----------|-------------|-------|
| 6.90 | 432587   | 110095.59   | 0.84  |
| 7.96 | 38191812 | 12932905.00 | 99.16 |

1-8-3

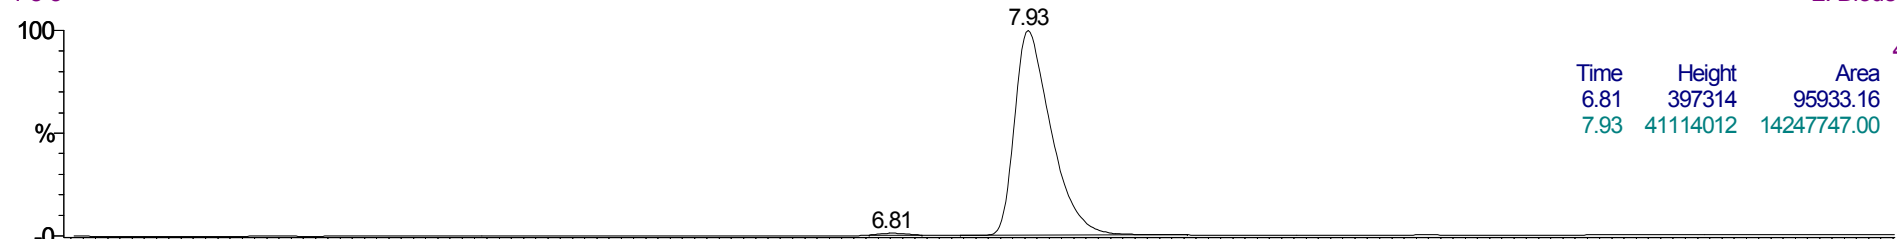

2: Diode Array  
TIC  
4.12e7

| Time | Height   | Area        | Area% |
|------|----------|-------------|-------|
| 6.81 | 397314   | 95933.16    | 0.67  |
| 7.93 | 41114012 | 14247747.00 | 99.33 |

1-8-7

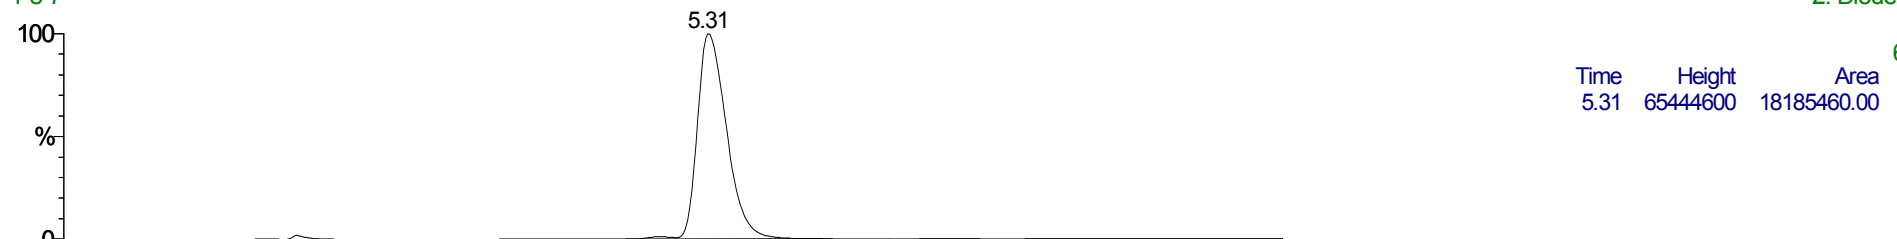

2: Diode Array  
TIC  
6.55e7

| Time | Height   | Area        | Area%  |
|------|----------|-------------|--------|
| 5.31 | 65444600 | 18185460.00 | 100.00 |

1-8-8

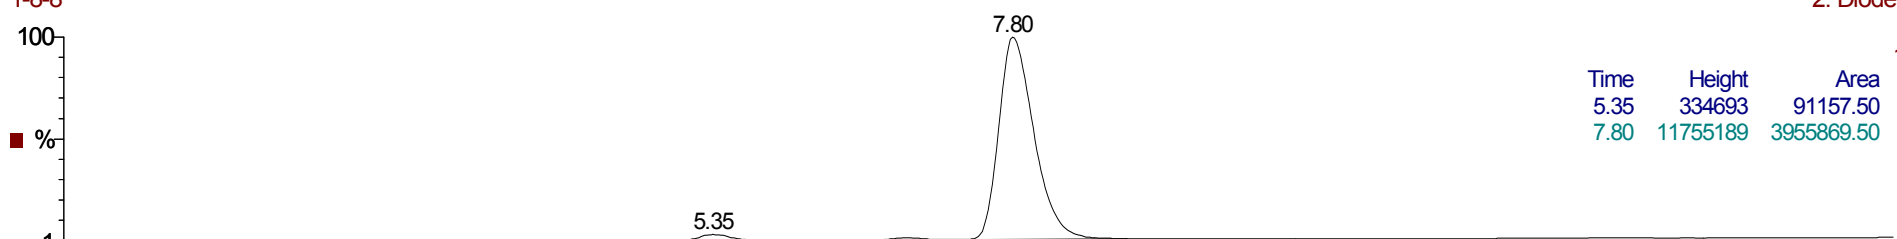

2: Diode Array  
TIC  
1.18e7

| Time | Height   | Area       | Area% |
|------|----------|------------|-------|
| 5.35 | 334693   | 91157.50   | 2.25  |
| 7.80 | 11755189 | 3955869.50 | 97.75 |

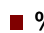



498

1-9-1 345 (5.863)

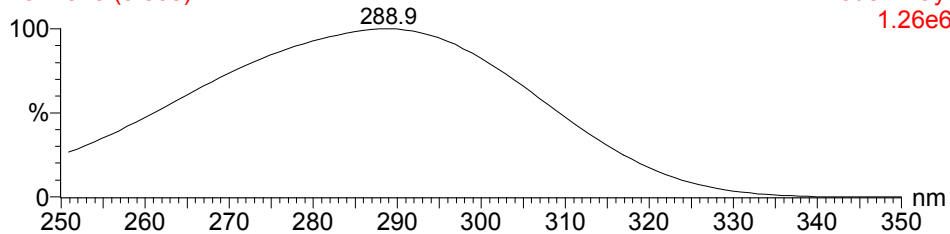

498

2: Diode Array 1-9-1 323 (5.947)

1.26e6

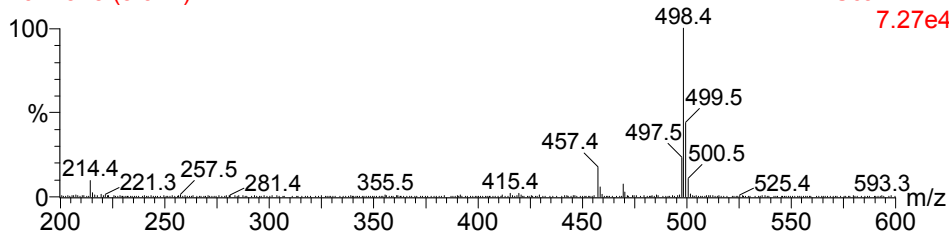

1: Scan AP+ 7.27e4

480

1-9-2 389 (6.587)

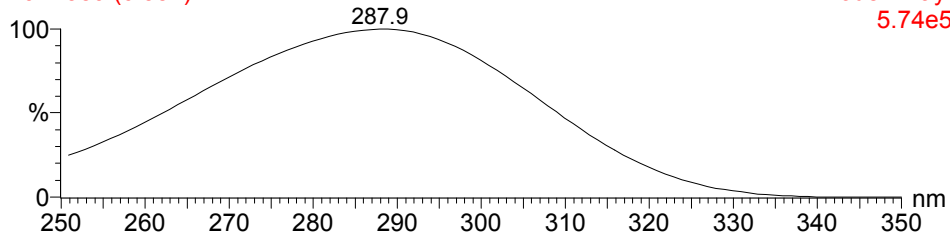

480

2: Diode Array 1-9-2 360 (6.625)

5.74e5

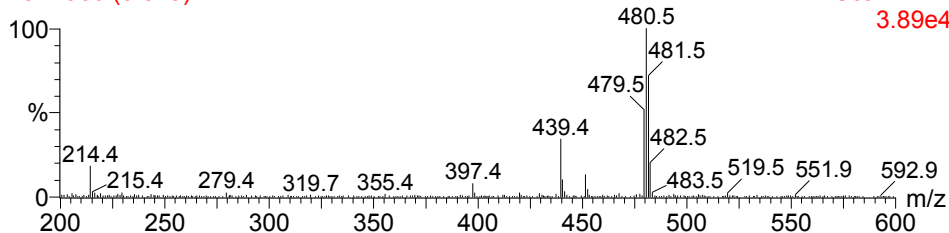

1: Scan AP+ 3.89e4

498

1-9-3 386 (6.542)

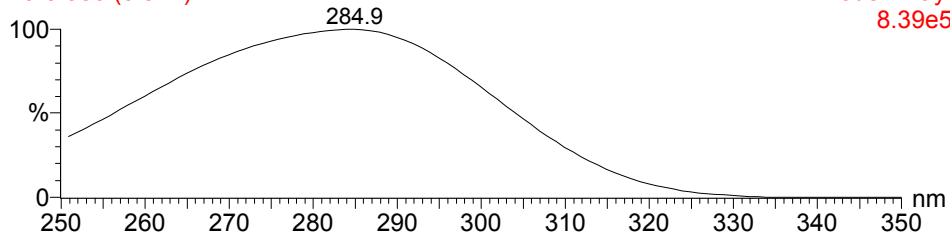

498

2: Diode Array 1-9-3 356 (6.552)

8.39e5

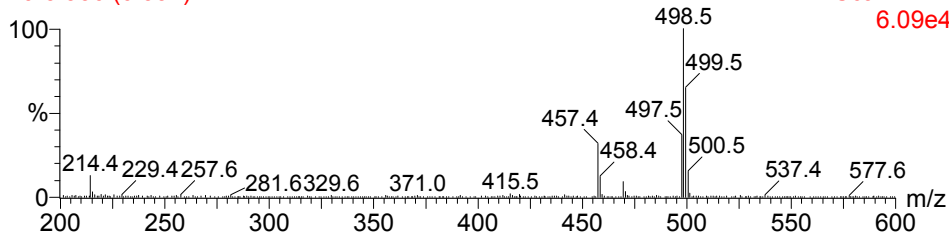

1: Scan AP+ 6.09e4

516

1-9-7 282 (4.800)

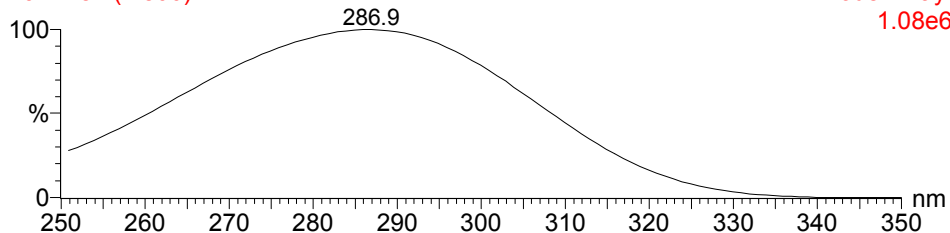

516

2: Diode Array 1-9-7 262 (4.829)

1.08e6

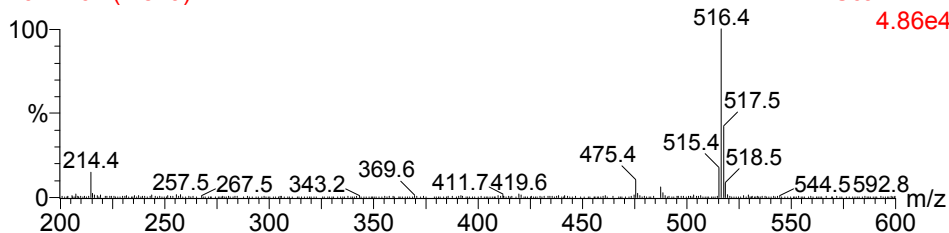

1: Scan AP+ 4.86e4

516

1-9-8 393 (6.657)

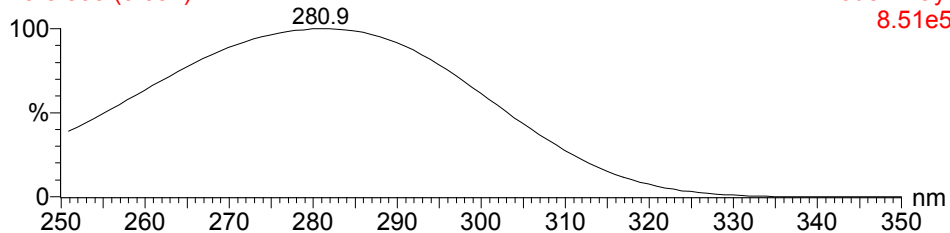

516

2: Diode Array 1-9-8 366 (6.735)

8.51e5

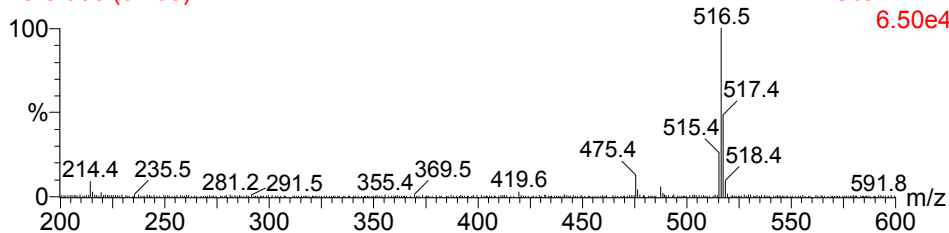

1: Scan AP+ 6.50e4

1-9-1

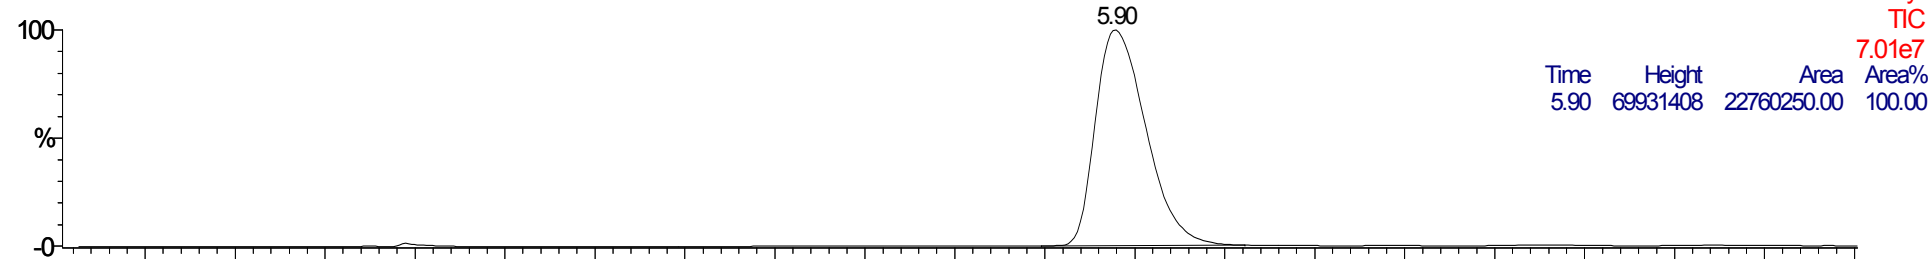

1-9-2

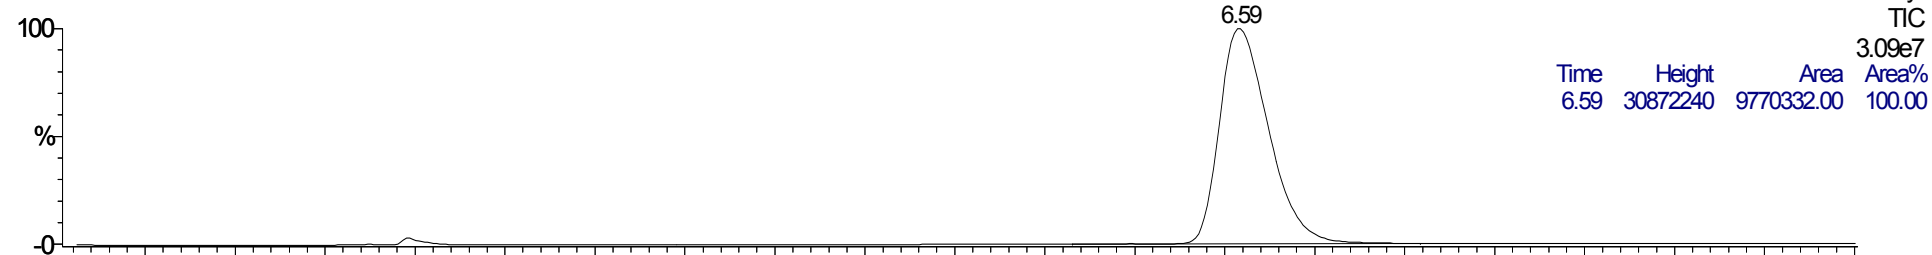

1-9-3

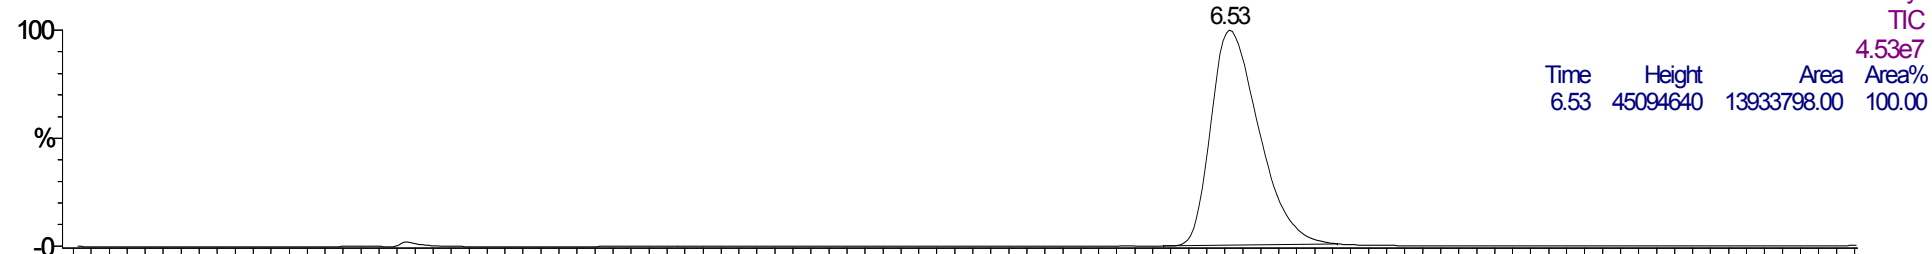

1-9-7

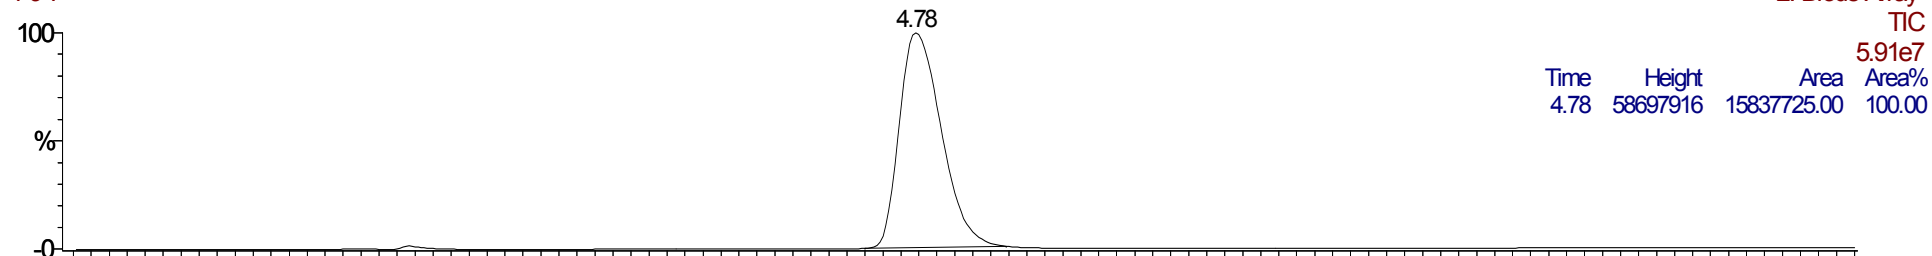

1-9-8

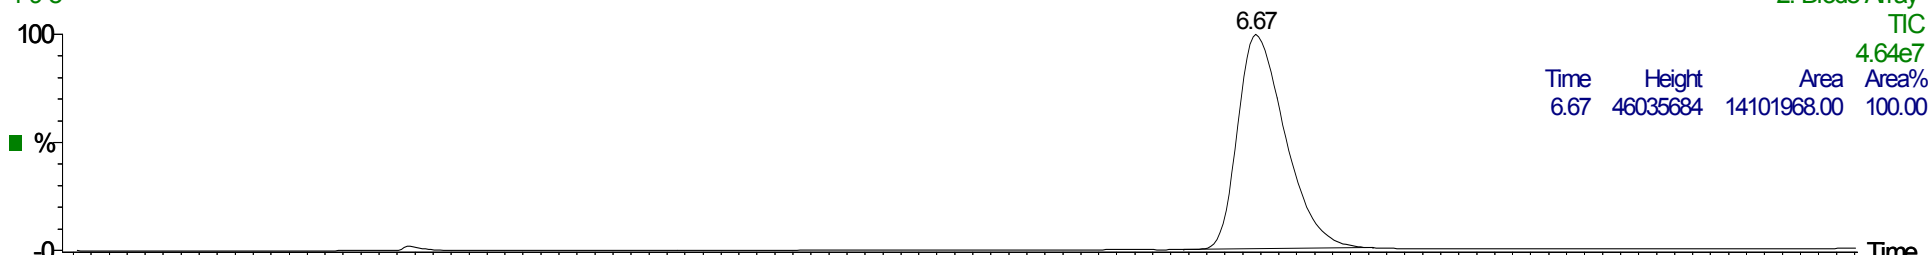

Time

480

1-10-1 371 (6.290)

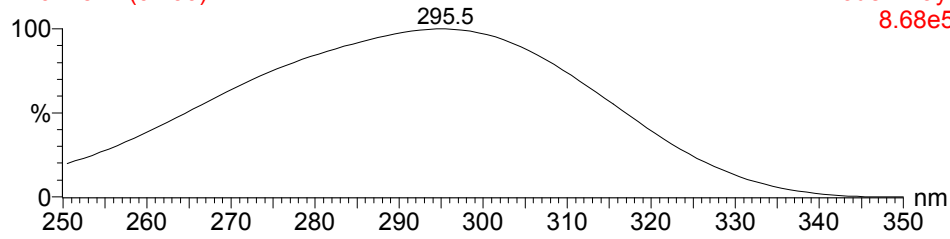

480

2: Diode Array 1-10-1 343 (6.314)

8.68e5

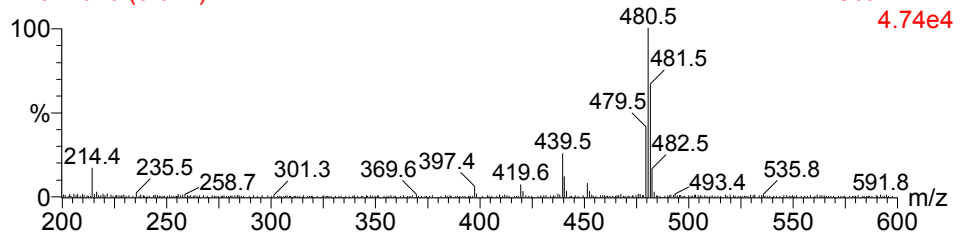

1: Scan AP+ 4.74e4

462

1-10-2 435 (7.357)

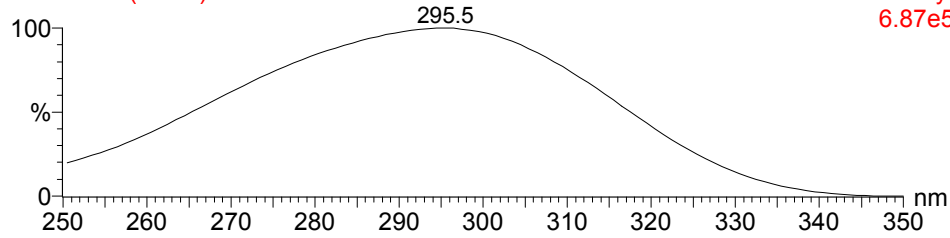

462

2: Diode Array 1-10-2 400 (7.359)

6.87e5

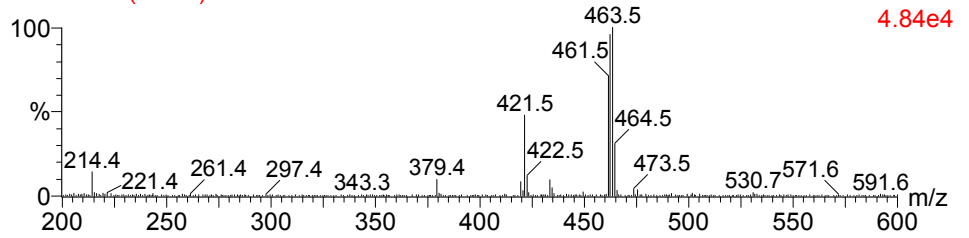

1: Scan AP+ 4.84e4

480

1-10-3 443 (7.492)

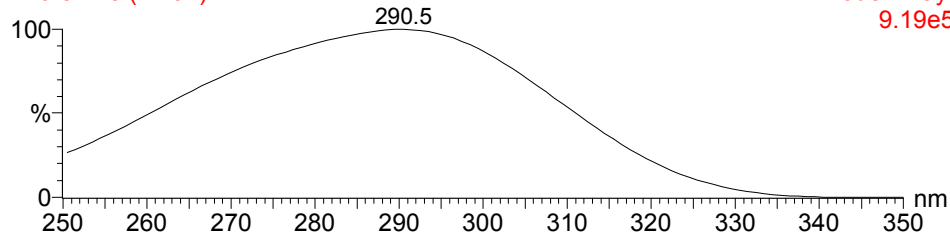

480

2: Diode Array 1-10-3 406 (7.469)

9.19e5

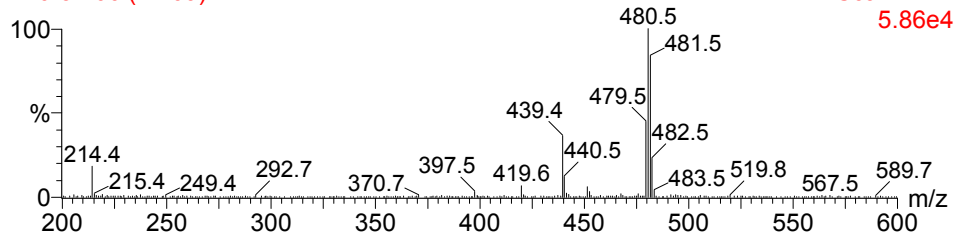

1: Scan AP+ 5.86e4

498

1-10-7 287 (4.893)

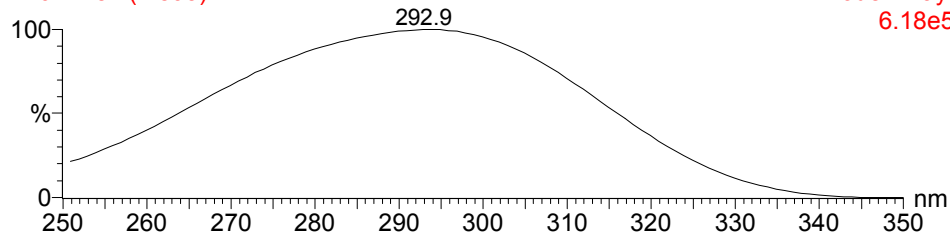

498

2: Diode Array 1-10-7 263 (4.847)

6.18e5

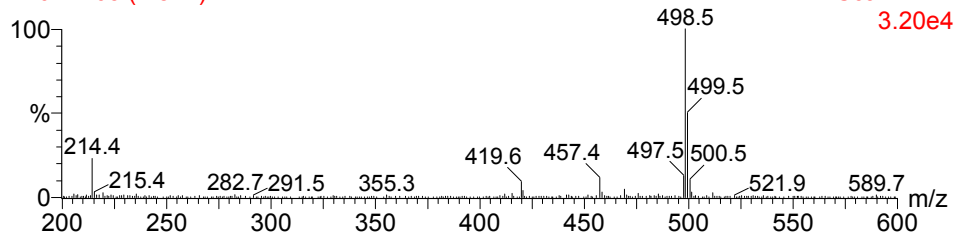

1: Scan AP+ 3.20e4

498

1-10-8 422 (7.135)

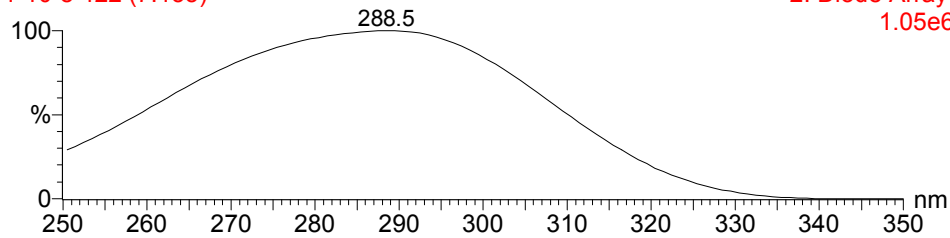

498

2: Diode Array 1-10-8 385 (7.084)

1.05e6

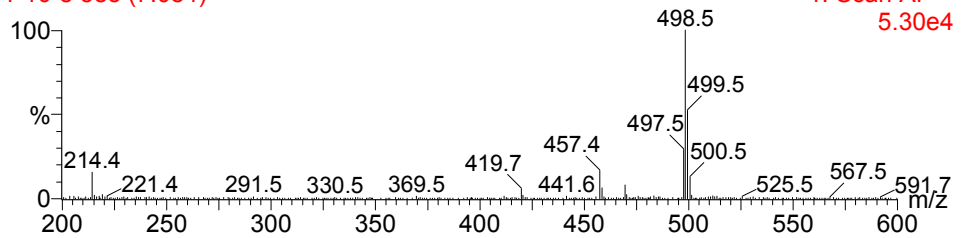

1: Scan AP+ 5.30e4

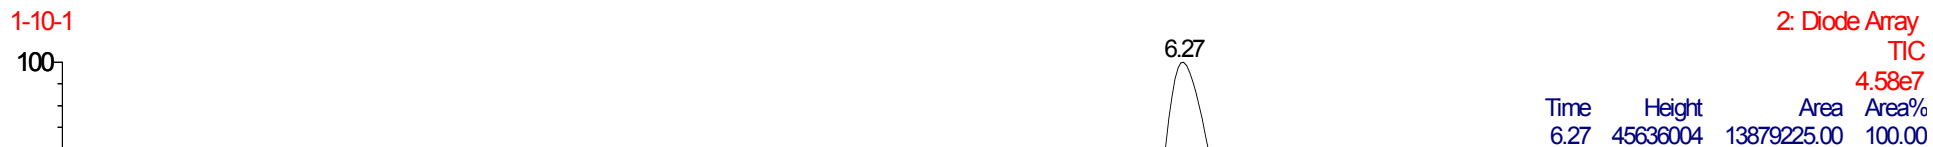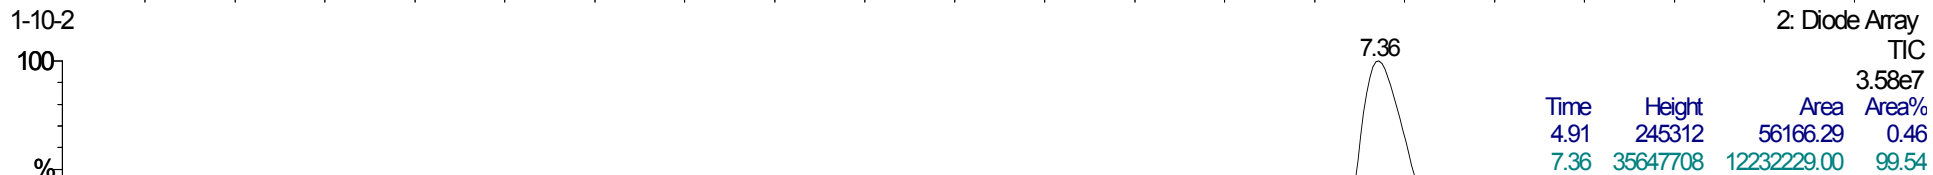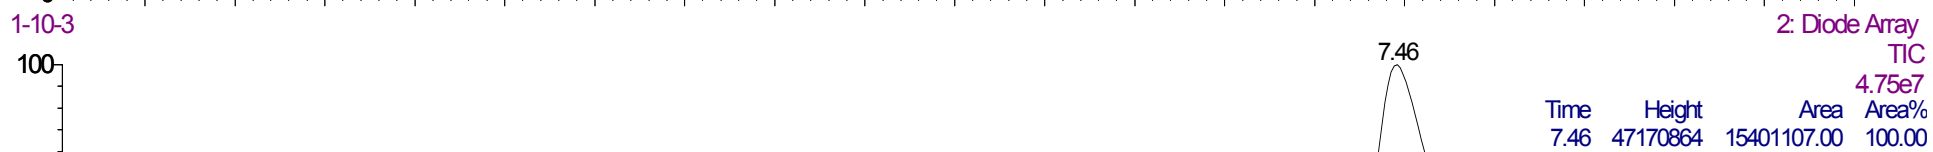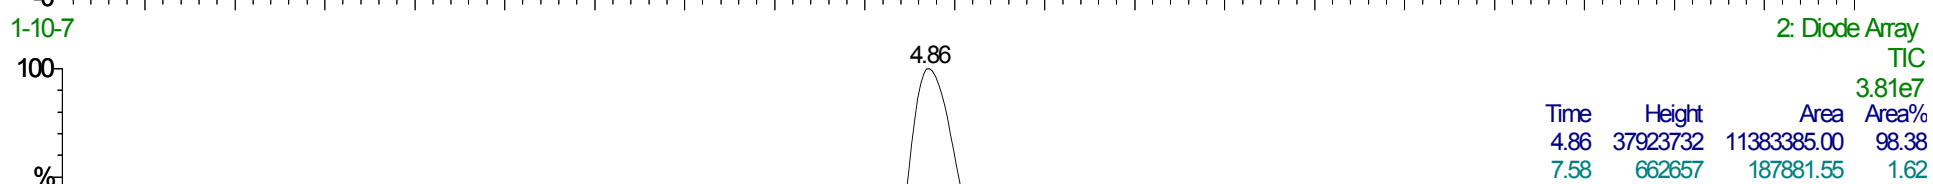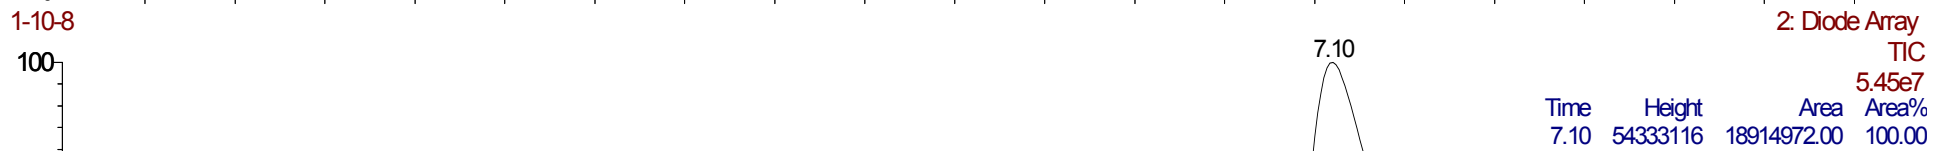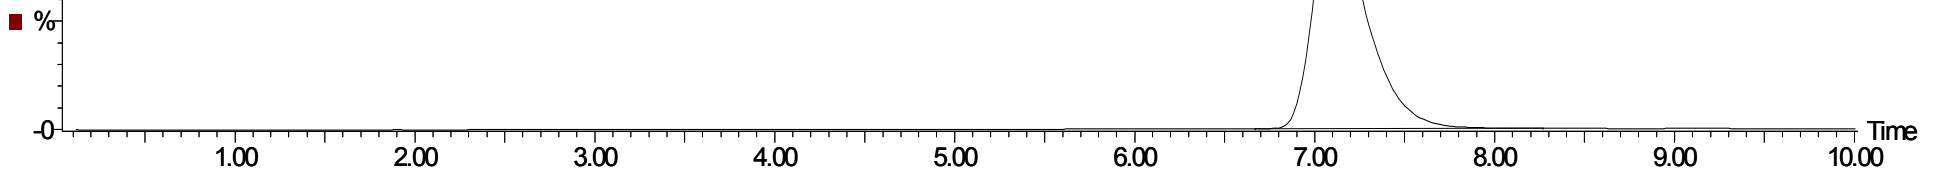

462

1-11-1 425 (7.193)

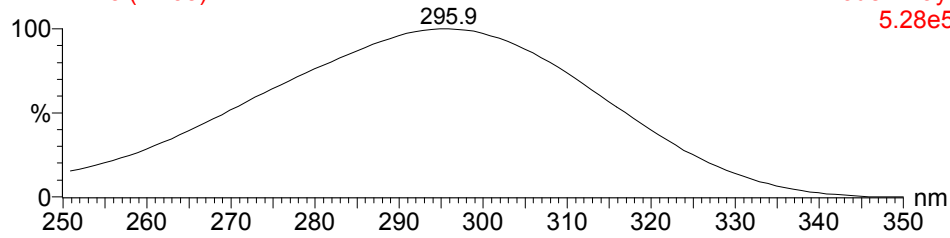

462

2: Diode Array 1-11-1 394 (7.249)

5.28e5

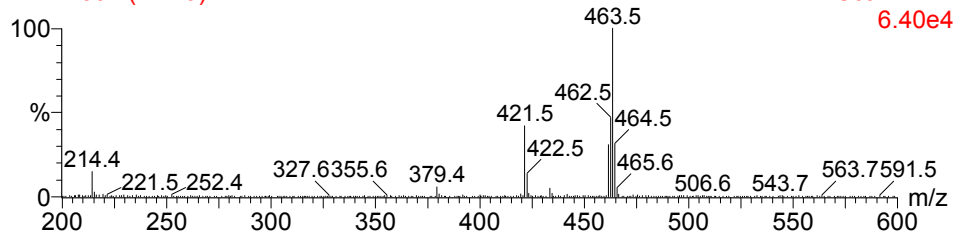

1: Scan AP+ 6.40e4

444

1-11-2 518 (8.735)

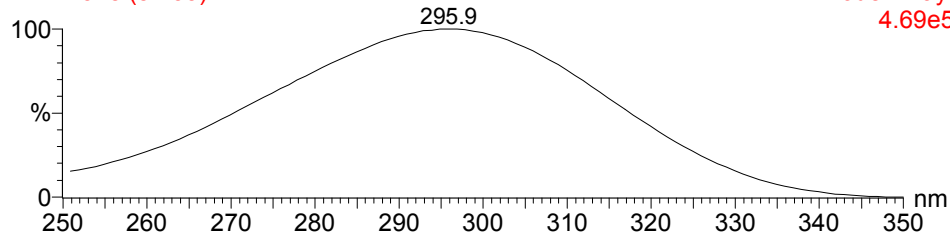

444

2: Diode Array 1-11-2 478 (8.789)

4.69e5

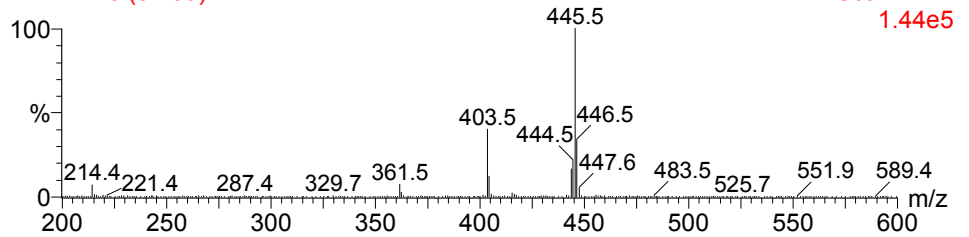

1: Scan AP+ 1.44e5

462

1-11-3 450 (7.607)

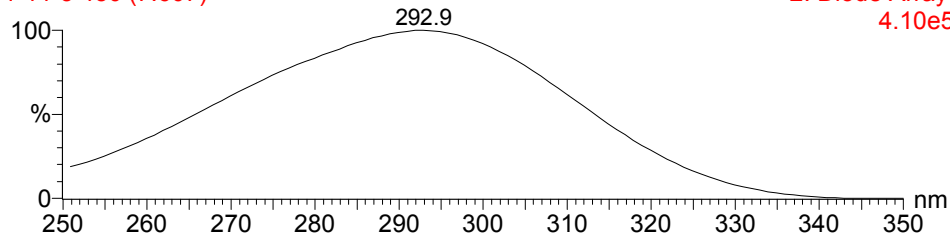

462

2: Diode Array 1-11-3 413 (7.597)

4.10e5

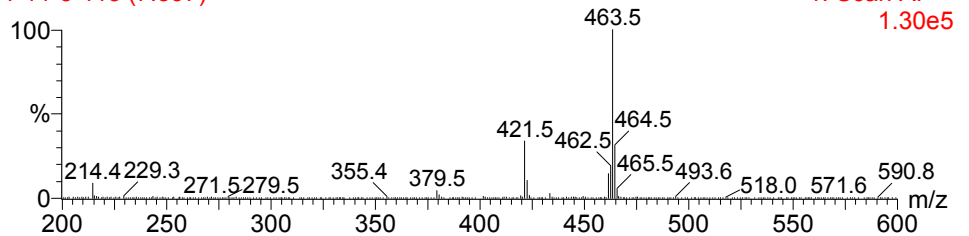

1: Scan AP+ 1.30e5

480

1-11-7 323 (5.497)

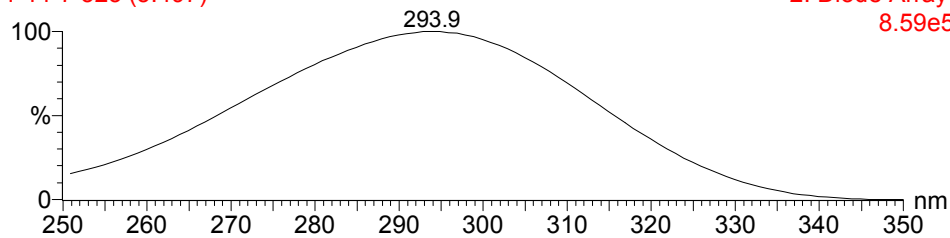

480

2: Diode Array 1-11-7 299 (5.507)

8.59e5

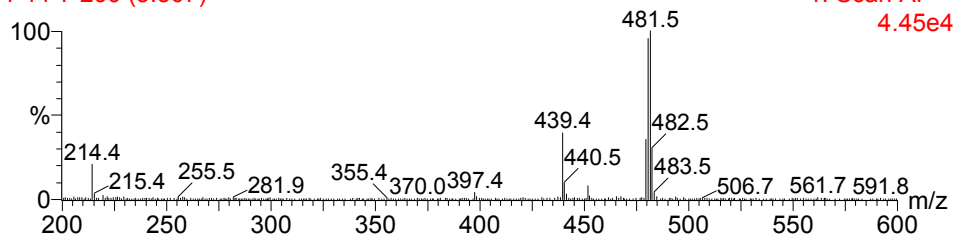

1: Scan AP+ 4.45e4

480

1-11-8 433 (7.320)

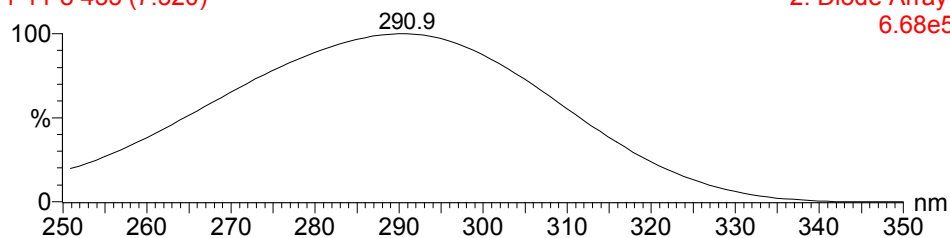

480

2: Diode Array 1-11-8 400 (7.359)

6.68e5

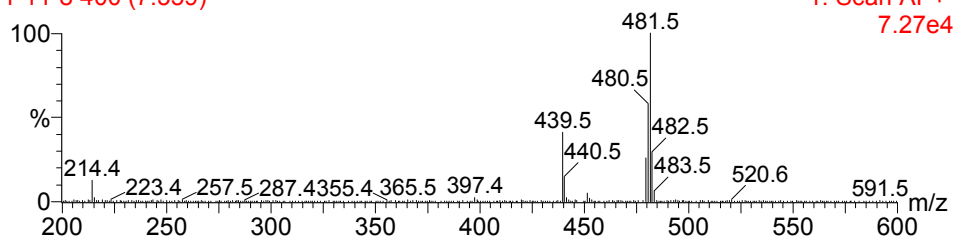

1: Scan AP+ 7.27e4

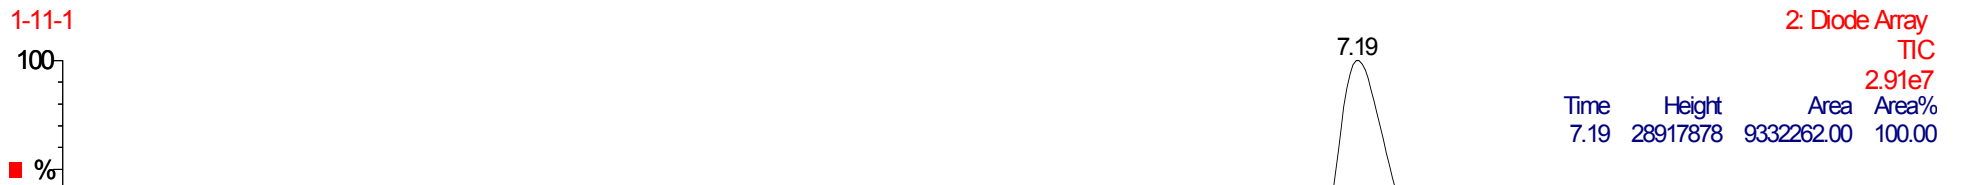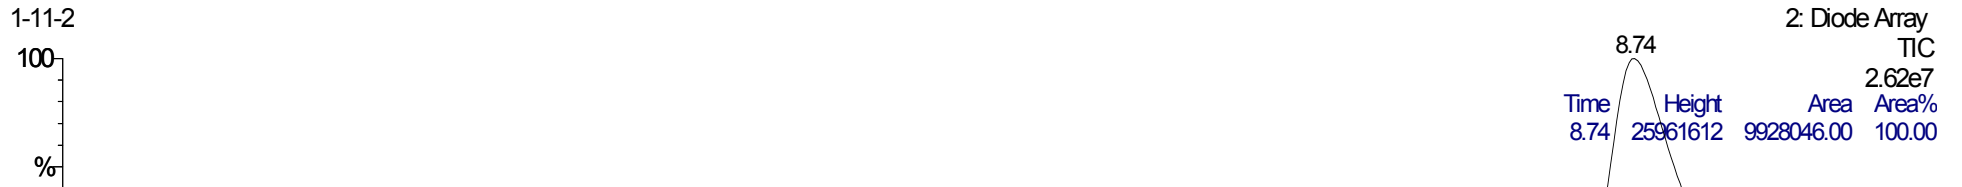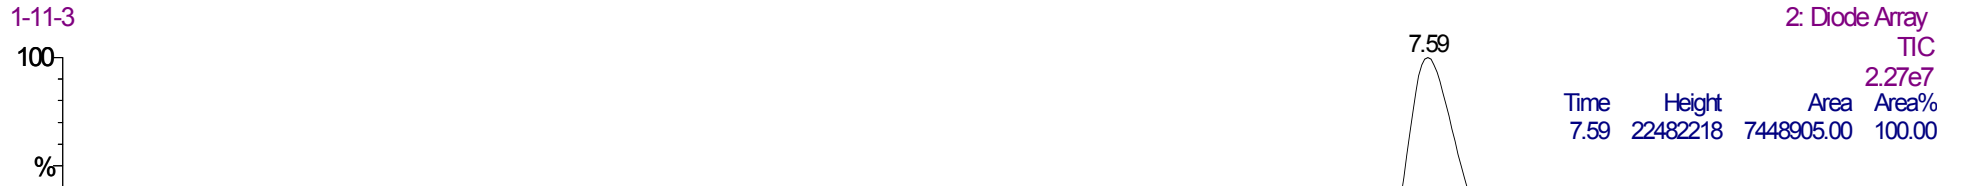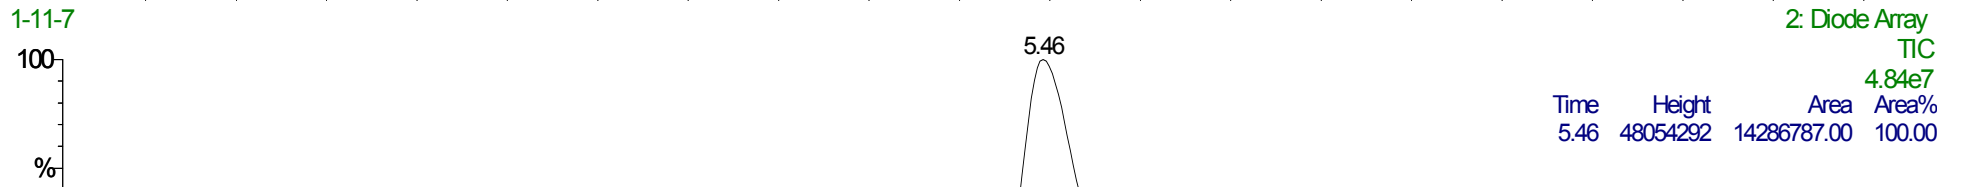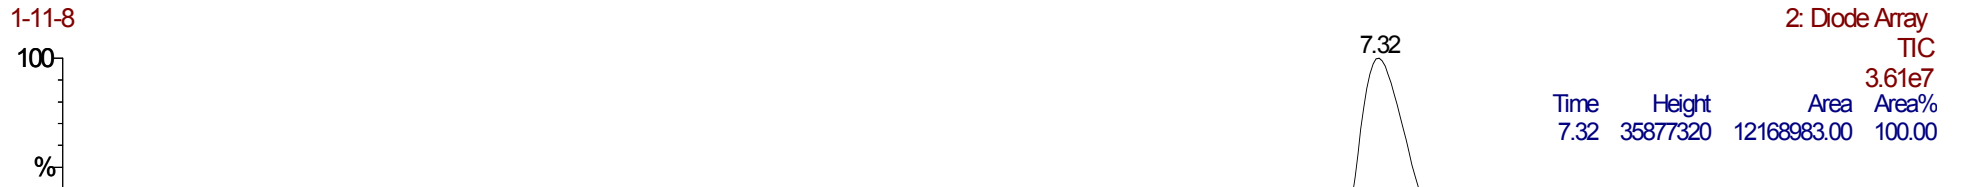

1.00 2.00 3.00 4.00 5.00 6.00 7.00 8.00 9.00 10.00 Time

462

211-99 897 (15.065)

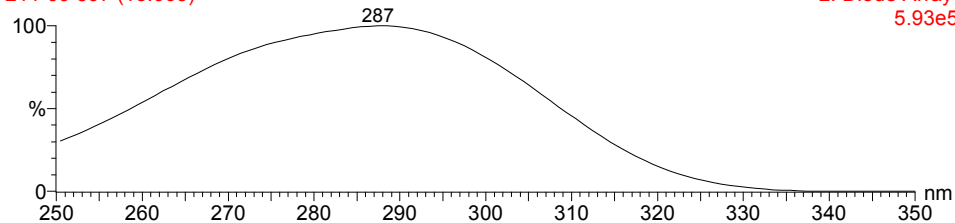

462

2: Diode Array 211-99 818 (15.031)

5.93e5

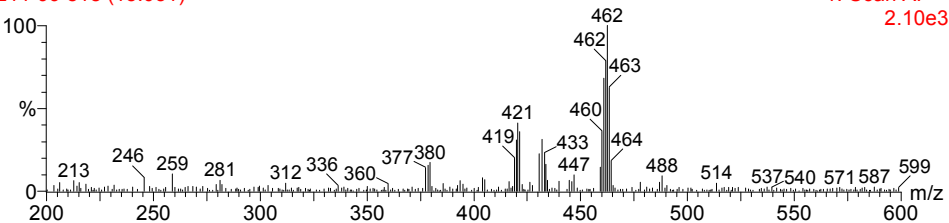

1: Scan AP+

2.10e3

444

212-99 1110 (18.615)

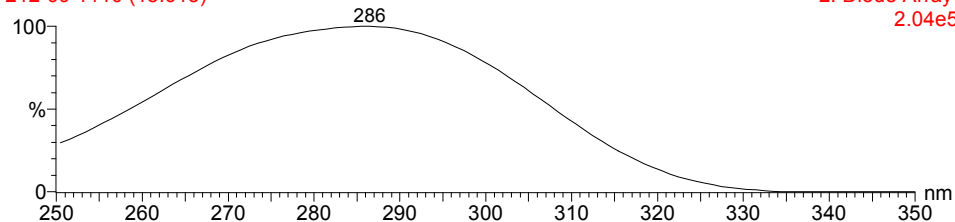

444

2: Diode Array 212-99 1016 (18.663)

2.04e5

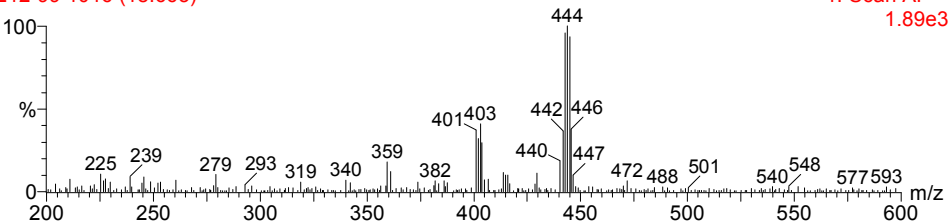

1: Scan AP+

1.89e3

462

213-99 1124 (18.852)

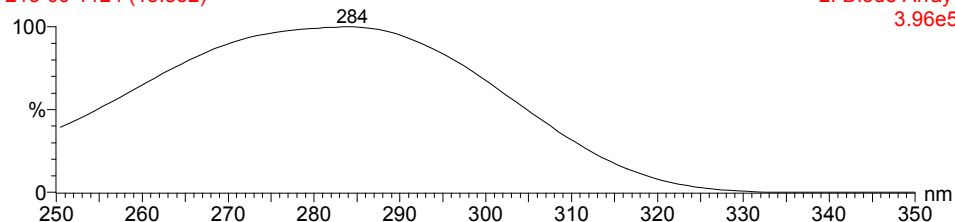

462

2: Diode Array 213-99 1028 (18.877)

3.96e5

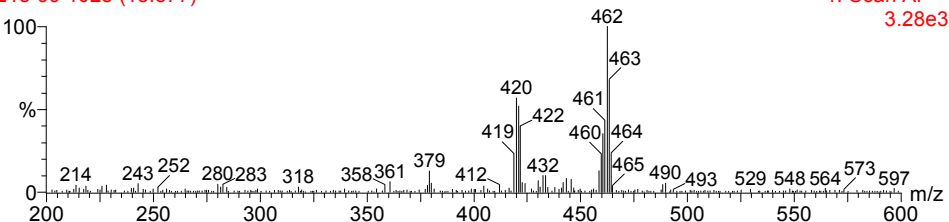

1: Scan AP+

3.28e3

480

217-99 673 (11.338)

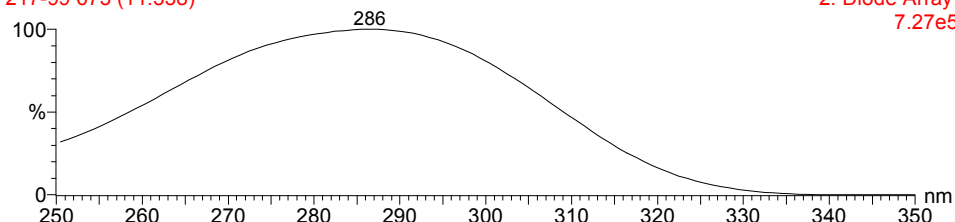

480

2: Diode Array 217-99 619 (11.378)

7.27e5

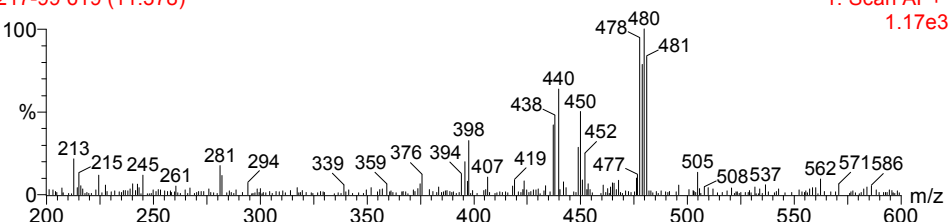

1: Scan AP+

1.17e3

480

218-99 1036 (17.392)

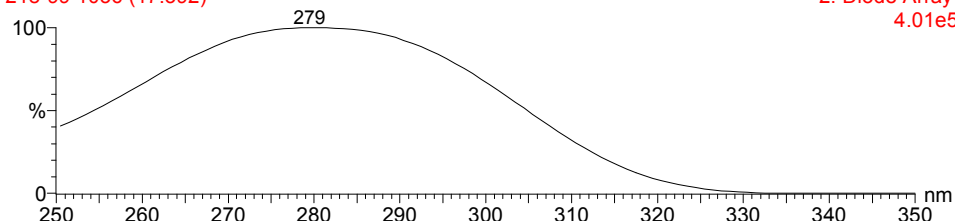

480

2: Diode Array 218-99 948 (17.413)

4.01e5

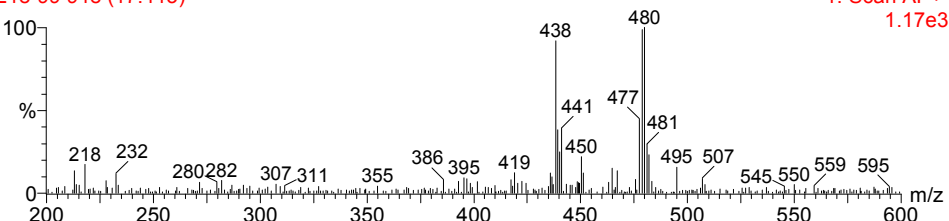

1: Scan AP+

1.17e3

211-2

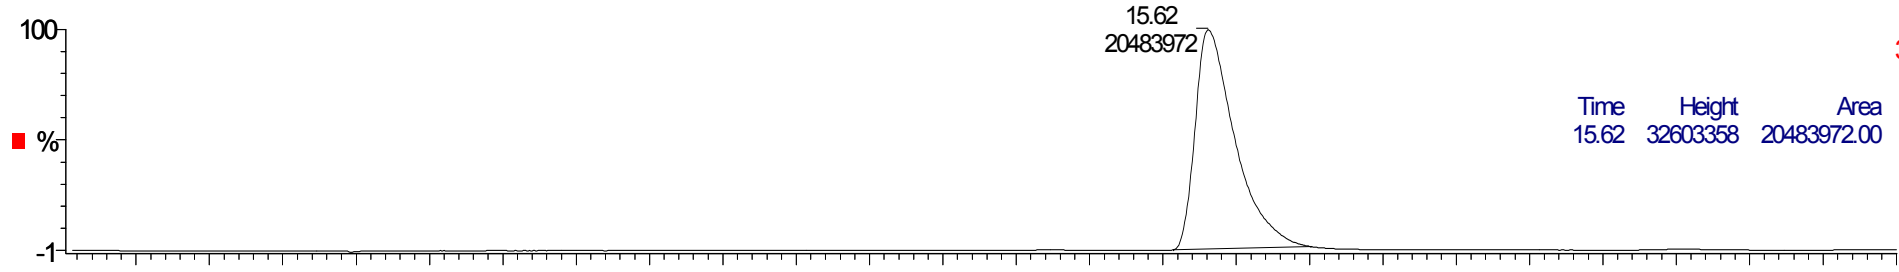

2: Diode Array  
TIC  
3.28e7  
Area

| Time  | Height   | Area        | Area%  |
|-------|----------|-------------|--------|
| 15.62 | 32603358 | 20483972.00 | 100.00 |

212-99

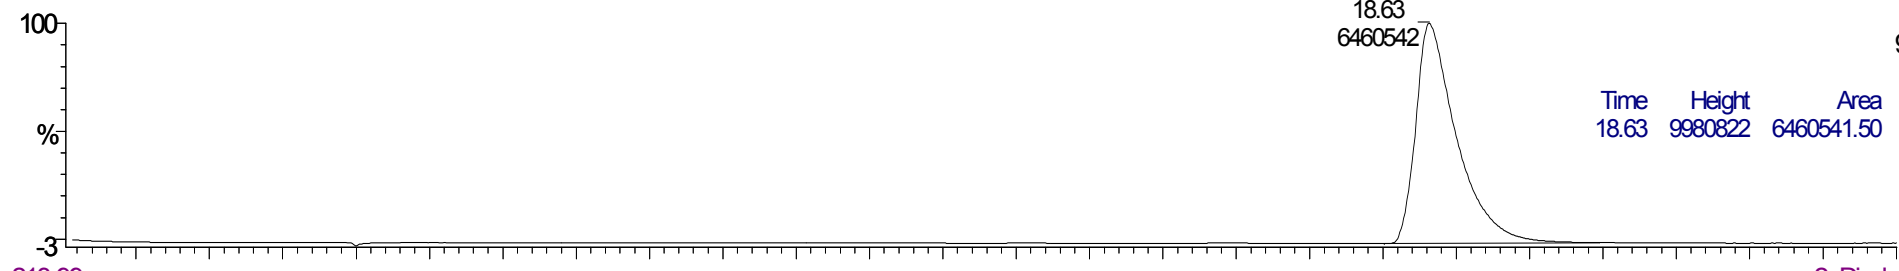

2: Diode Array  
TIC  
9.78e6  
Area

| Time  | Height  | Area       | Area%  |
|-------|---------|------------|--------|
| 18.63 | 9980822 | 6460541.50 | 100.00 |

213-99

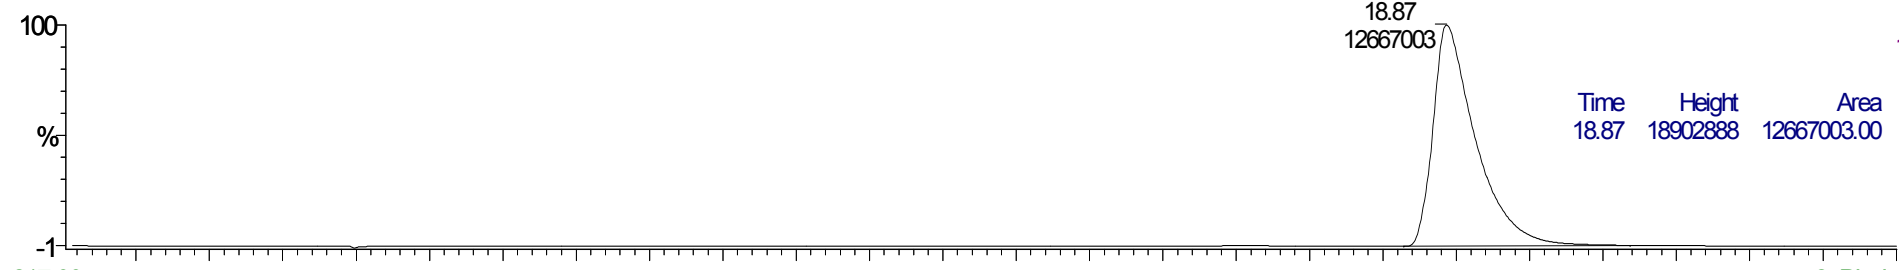

2: Diode Array  
TIC  
1.89e7  
Area

| Time  | Height   | Area        | Area%  |
|-------|----------|-------------|--------|
| 18.87 | 18902888 | 12667003.00 | 100.00 |

217-99

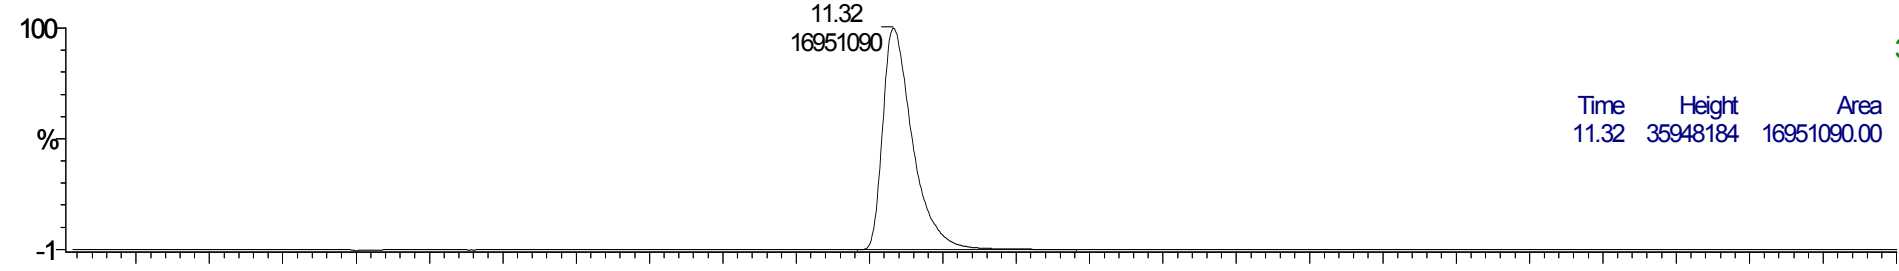

2: Diode Array  
TIC  
3.59e7  
Area

| Time  | Height   | Area        | Area%  |
|-------|----------|-------------|--------|
| 11.32 | 35948184 | 16951090.00 | 100.00 |

218-99

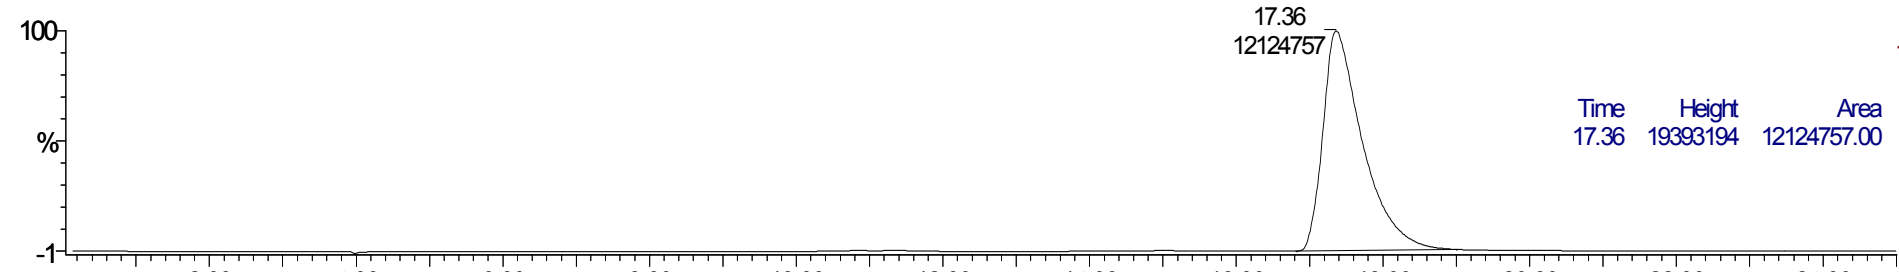

2: Diode Array  
TIC  
1.94e7  
Area

| Time  | Height   | Area        | Area%  |
|-------|----------|-------------|--------|
| 17.36 | 19393194 | 12124757.00 | 100.00 |

Time



444

221-99 1071 (17.960)

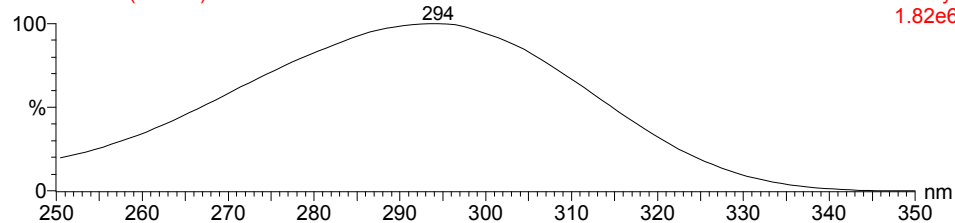

444

2: Diode Array 221-99 982 (18.032)

1.82e6

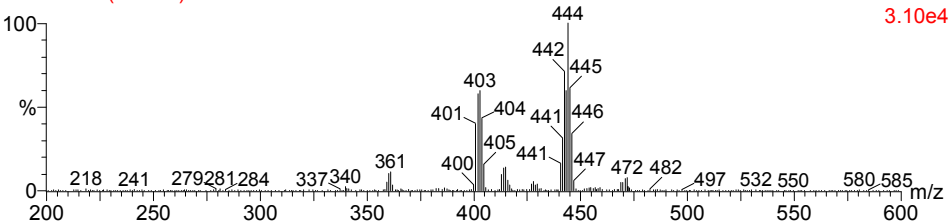

1: Scan AP+ 3.10e4

426

222-99 1300 (21.780)

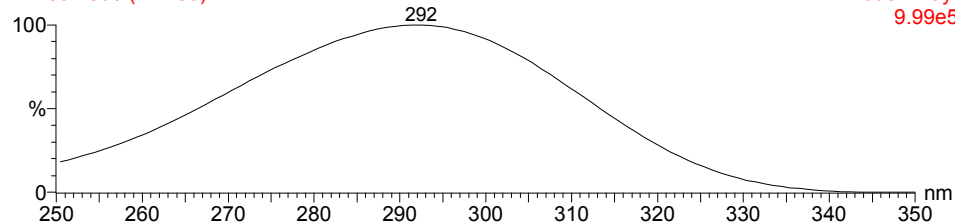

426

2: Diode Array 222-99 1191 (21.864)

9.99e5

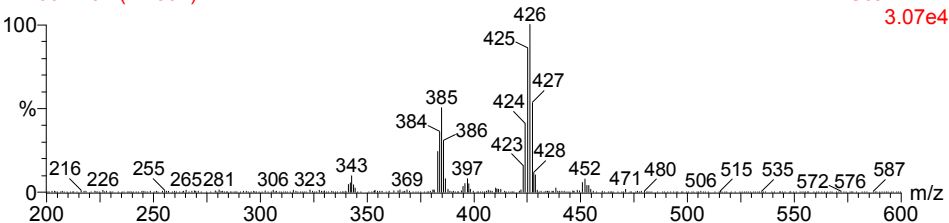

1: Scan AP+ 3.07e4

444

223-99 1308 (21.915)

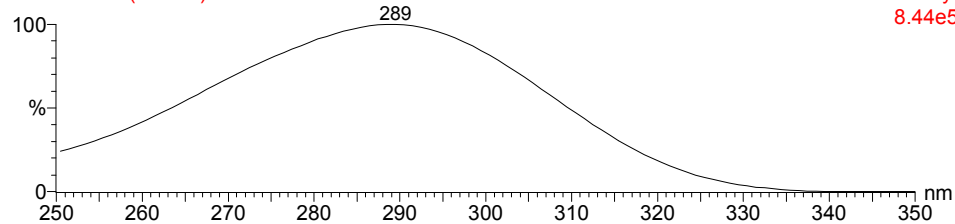

444

2: Diode Array 223-99 1194 (21.919)

8.44e5

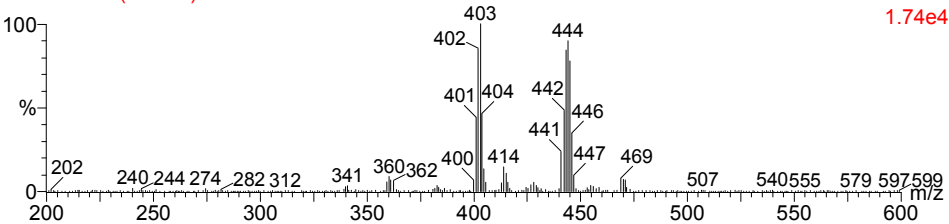

1: Scan AP+ 1.74e4

462

227-99 785 (13.205)

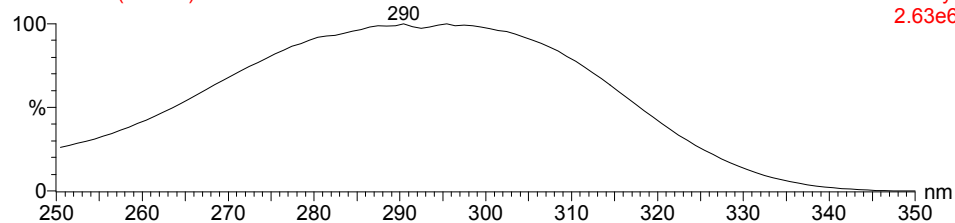

462

2: Diode Array 227-99 707 (12.992)

2.63e6

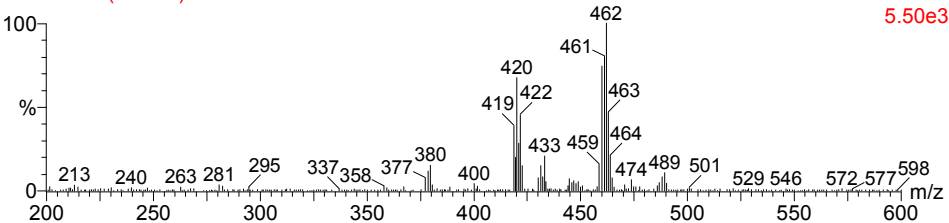

1: Scan AP+ 5.50e3

462

228-99 1223 (20.493)

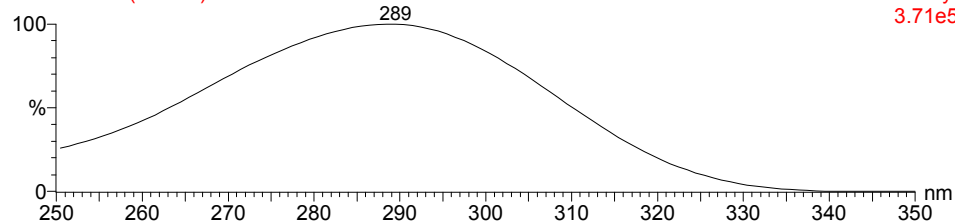

462

2: Diode Array 228-99 1110 (20.379)

3.71e5

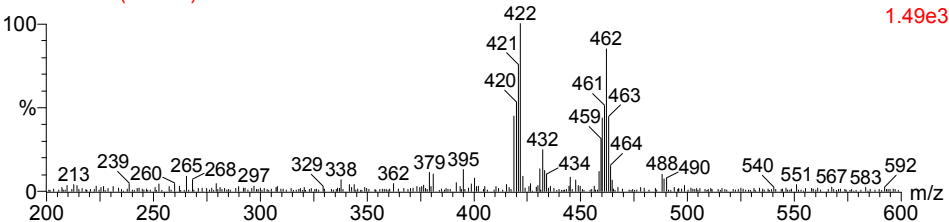

1: Scan AP+ 1.49e3

221-99

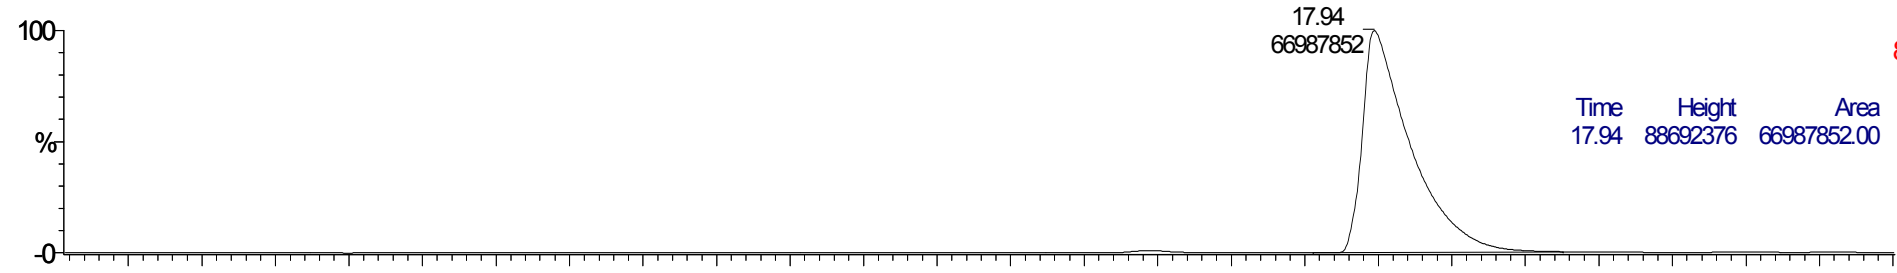

2: Diode Array  
TIC  
8.88e7  
Area

| Time  | Height   | Area        | Area%  |
|-------|----------|-------------|--------|
| 17.94 | 88692376 | 66987852.00 | 100.00 |

222-99

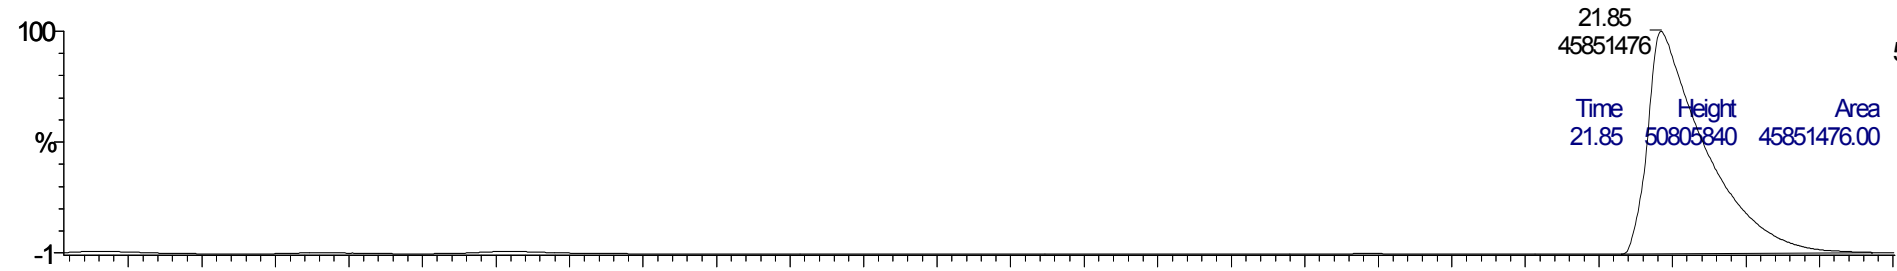

2: Diode Array  
TIC  
5.06e7  
Area

| Time  | Height   | Area        | Area%  |
|-------|----------|-------------|--------|
| 21.85 | 50805840 | 45851476.00 | 100.00 |

223-99

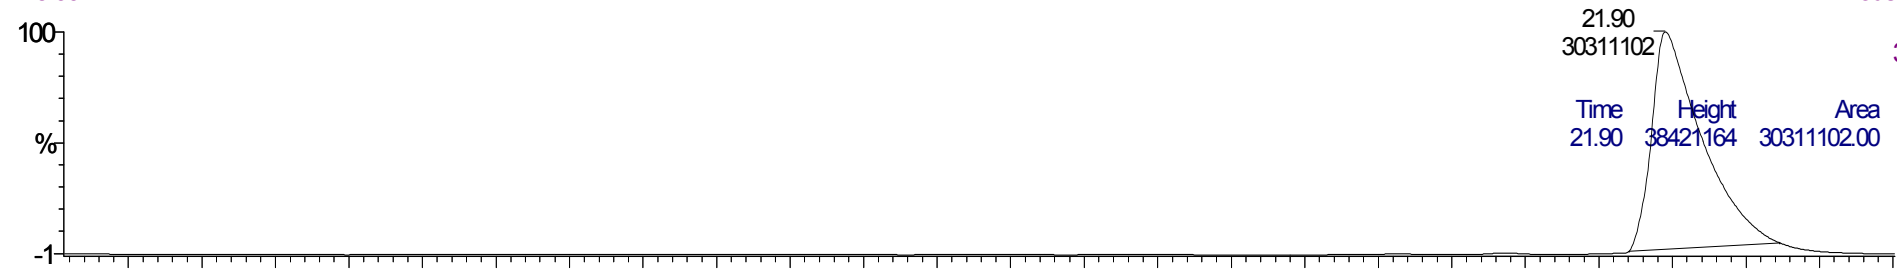

2: Diode Array  
TIC  
3.92e7  
Area

| Time  | Height   | Area        | Area%  |
|-------|----------|-------------|--------|
| 21.90 | 38421164 | 30311102.00 | 100.00 |

227-99

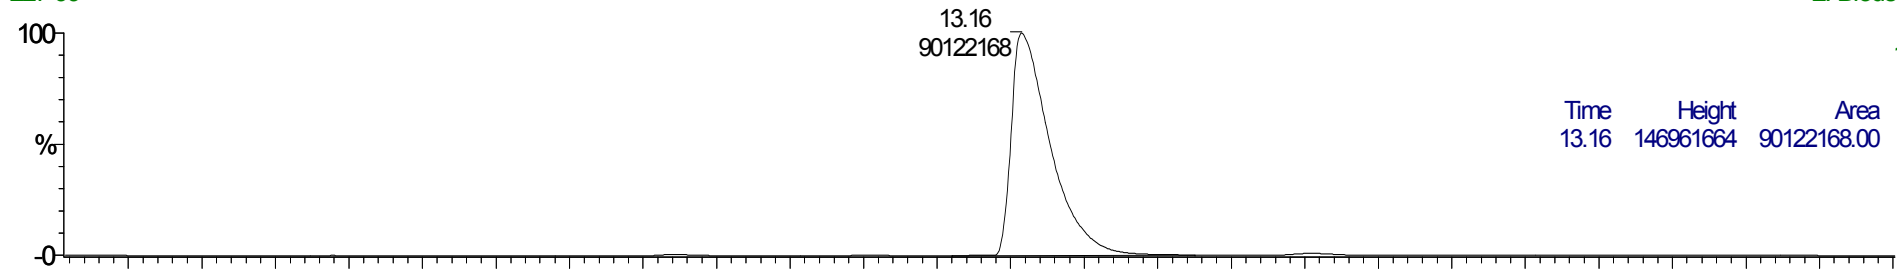

2: Diode Array  
TIC  
1.47e8  
Area

| Time  | Height    | Area        | Area%  |
|-------|-----------|-------------|--------|
| 13.16 | 146961664 | 90122168.00 | 100.00 |

228-99

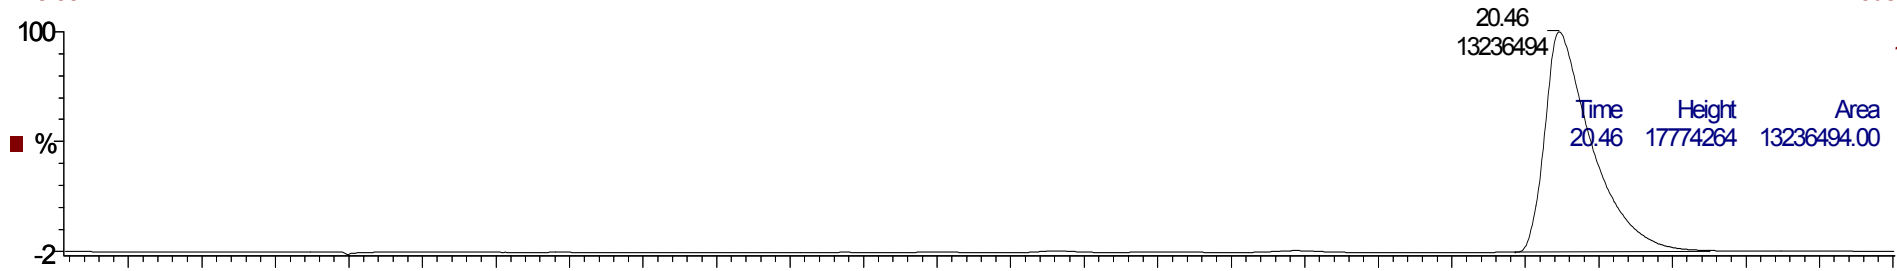

2: Diode Array  
TIC  
1.77e7  
Area

| Time  | Height   | Area        | Area%  |
|-------|----------|-------------|--------|
| 20.46 | 17774264 | 13236494.00 | 100.00 |

■ %

Time

426

2-5-1 617 (10.387)

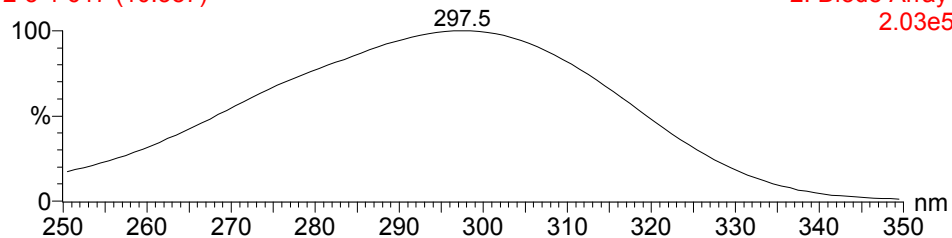

426

2: Diode Array 2-5-1 568 (10.439)

2.03e5

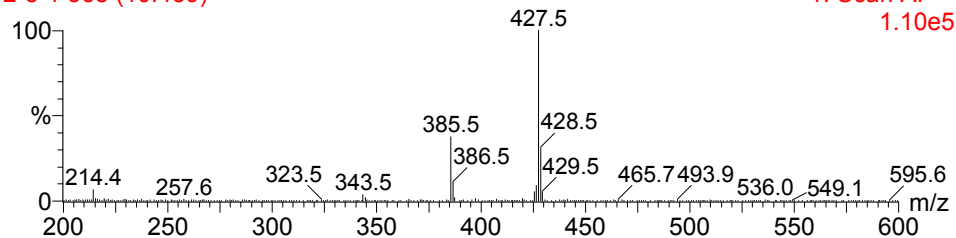

1: Scan AP+

1.10e5

408

2-5-2 833 (13.985)

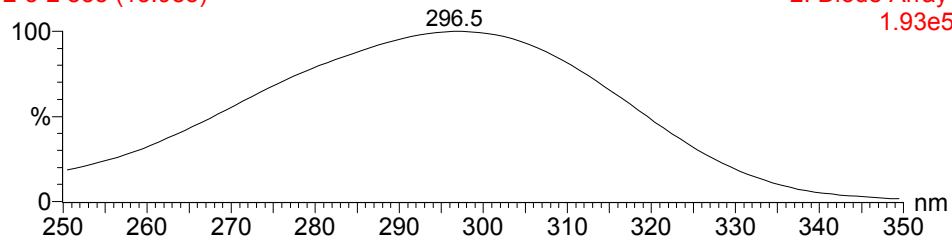

408

2: Diode Array 2-5-2 763 (14.014)

1.93e5

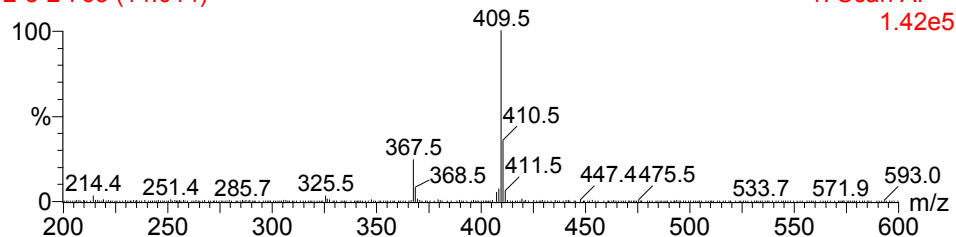

1: Scan AP+

1.42e5

426

2-5-3 706 (11.875)

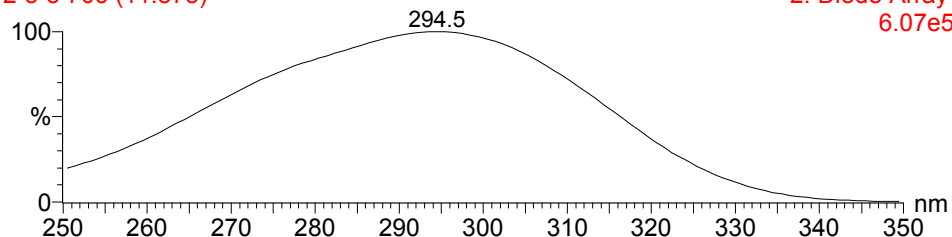

426

2: Diode Array 2-5-3 649 (11.924)

6.07e5

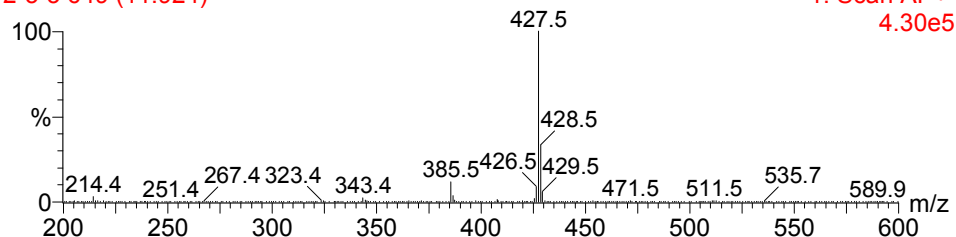

1: Scan AP+

4.30e5

444

2-5-7 417 (7.057)

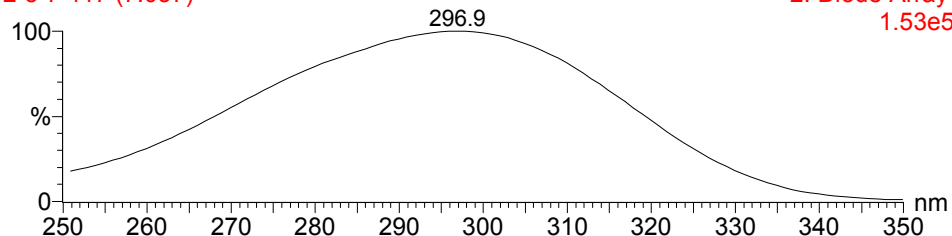

444

2: Diode Array 2-5-7 387 (7.120)

1.53e5

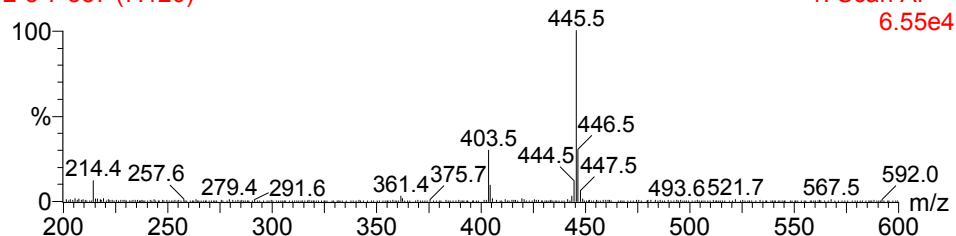

1: Scan AP+

6.55e4

444

2-5-8 635 (10.697)

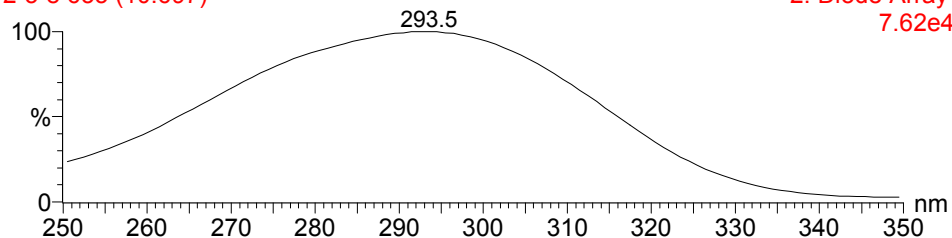

444

2: Diode Array 2-5-8 584 (10.732)

7.62e4

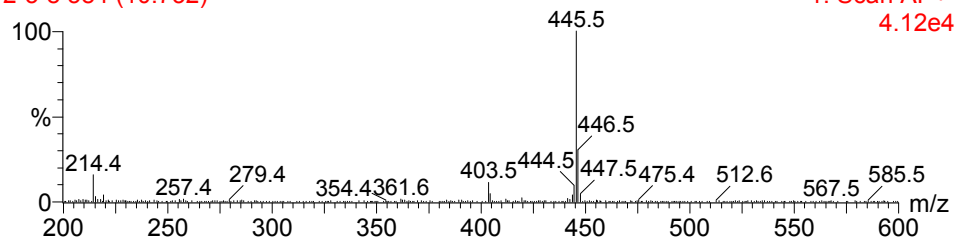

1: Scan AP+

4.12e4

2-5-1

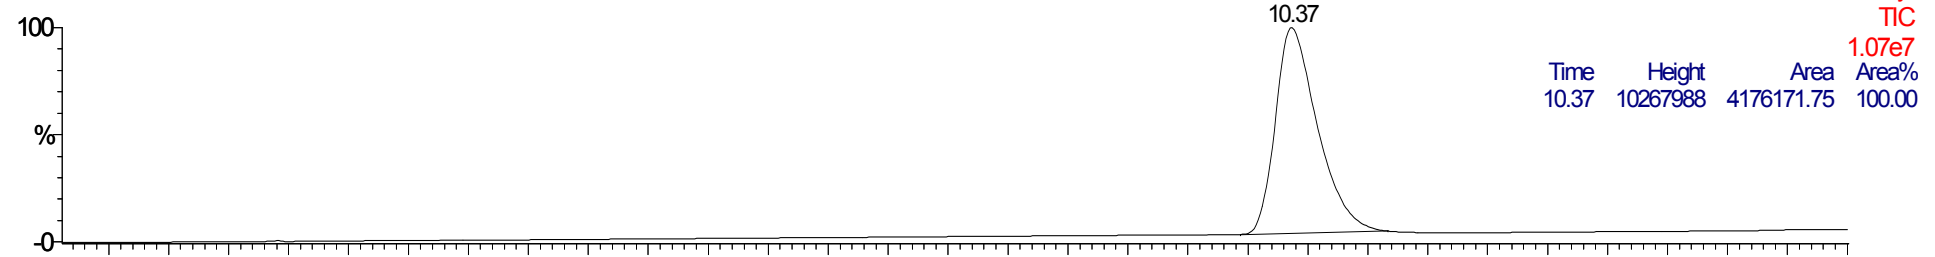

2-5-2

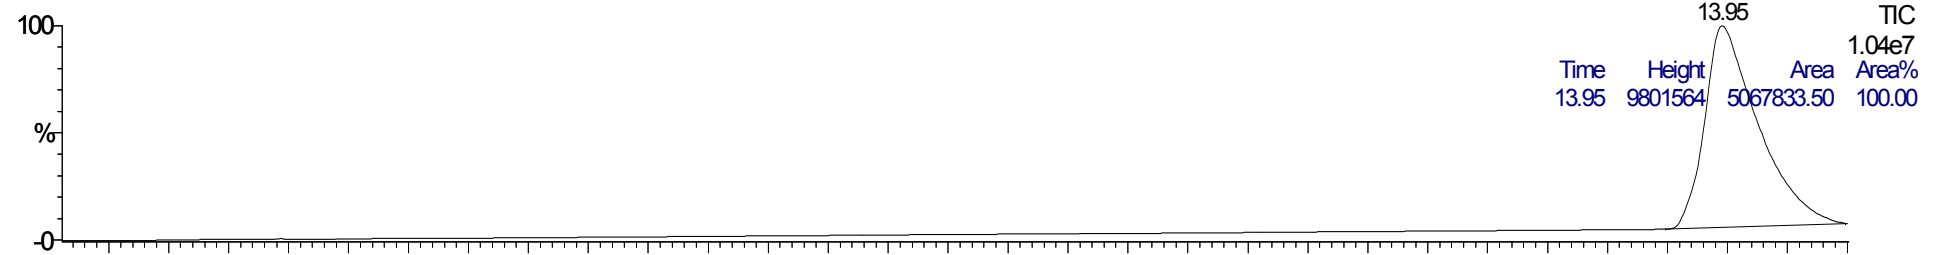

2-5-3

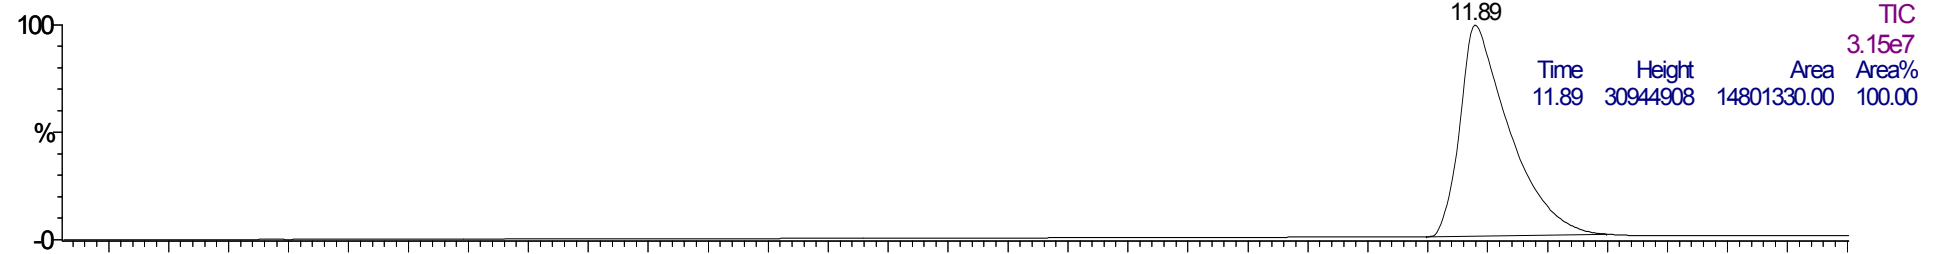

2-5-7

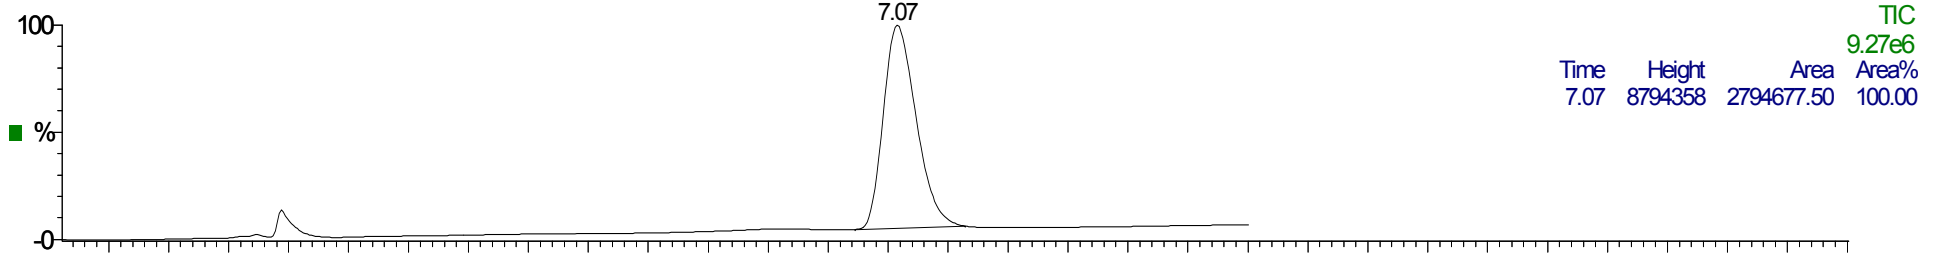

2-5-8

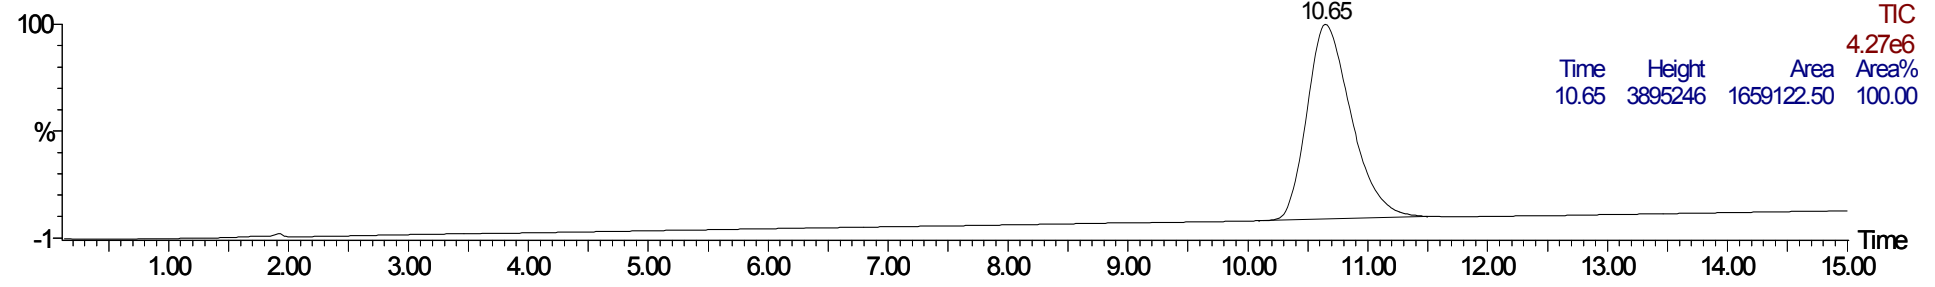

444

2-6-1 477 (8.052)

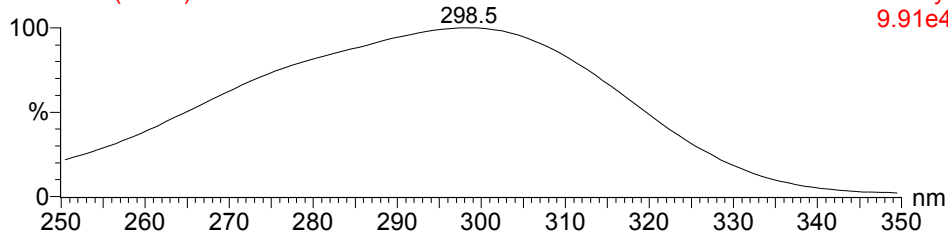

2: Diode Array 2-6-1 443 (8.147)

9.91e4

444

2-6-1 443 (8.147)

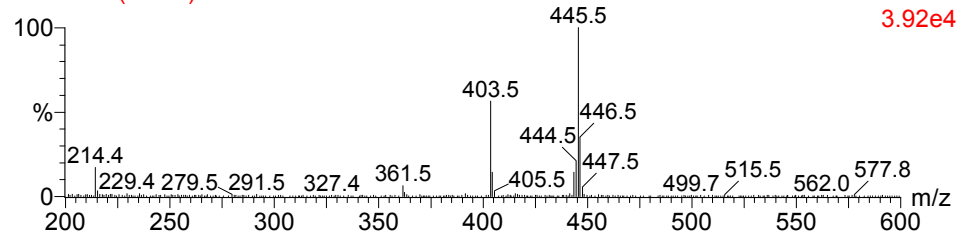

1: Scan AP+

3.92e4

426

2-6-2 622 (10.468)

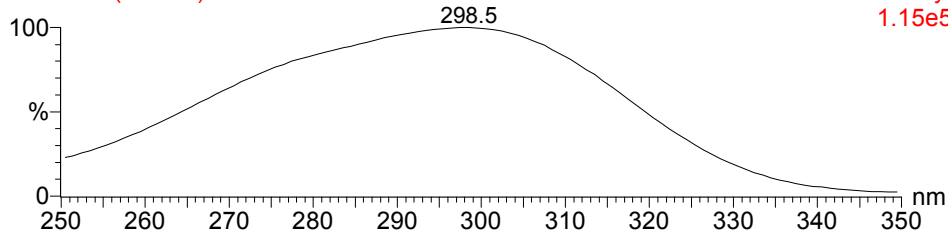

2: Diode Array 2-6-2 568 (10.439)

1.15e5

426

2-6-2 568 (10.439)

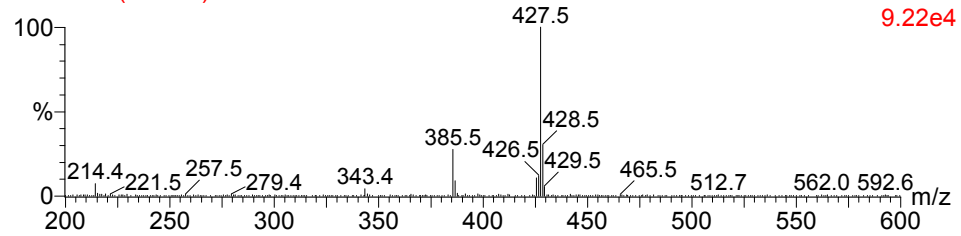

1: Scan AP+

9.22e4

444

2-6-3 649 (10.918)

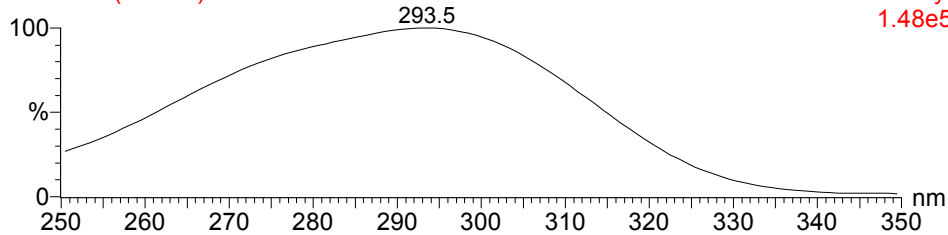

2: Diode Array 2-6-3 597 (10.971)

1.48e5

444

2-6-3 597 (10.971)

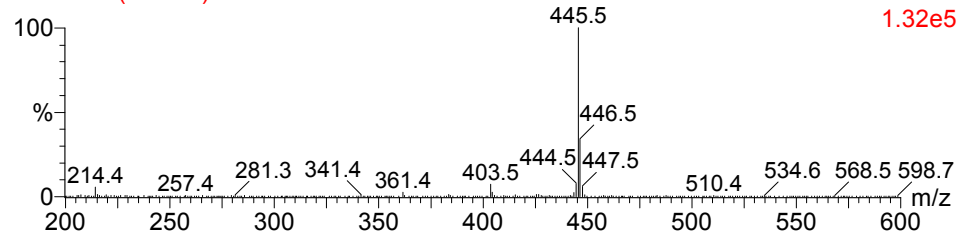

1: Scan AP+

1.32e5

462

2-6-7 343 (5.830)

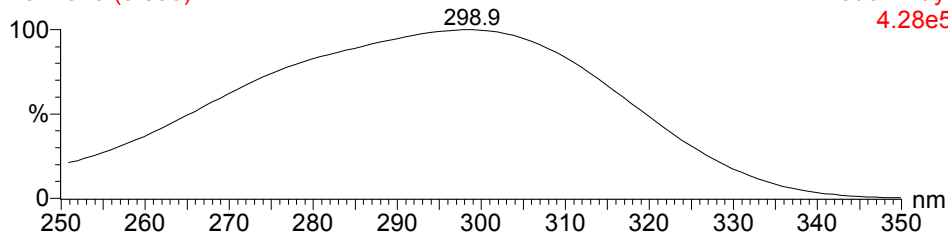

2: Diode Array 2-6-7 318 (5.855)

4.28e5

462

2-6-7 318 (5.855)

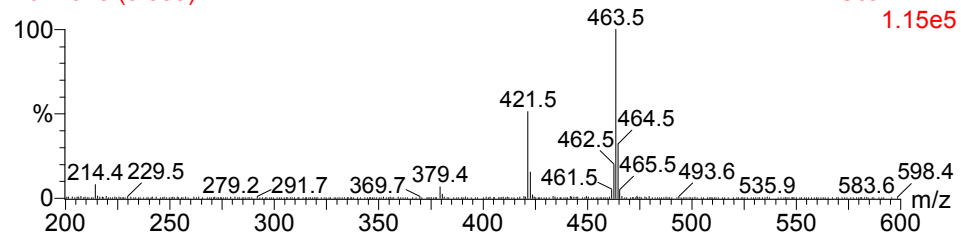

1: Scan AP+

1.15e5

462

2-6-8 562 (9.477)

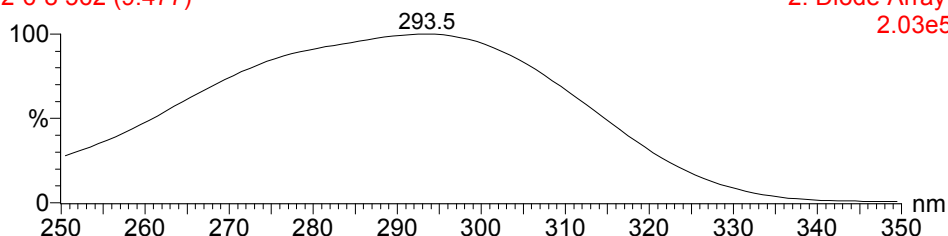

2: Diode Array 2-6-8 521 (9.577)

2.03e5

462

2-6-8 521 (9.577)

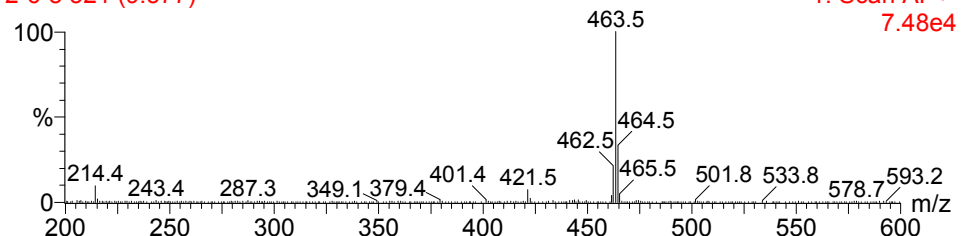

1: Scan AP+

7.48e4

2-6-1

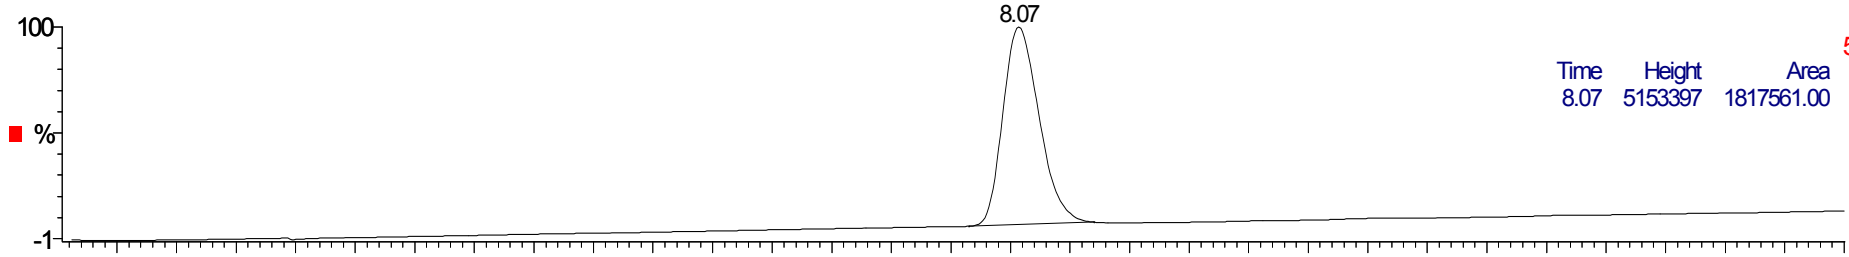

2: Diode Array  
TIC  
5.52e6

| Time | Height  | Area       | Area%  |
|------|---------|------------|--------|
| 8.07 | 5153397 | 1817561.00 | 100.00 |

2-6-2

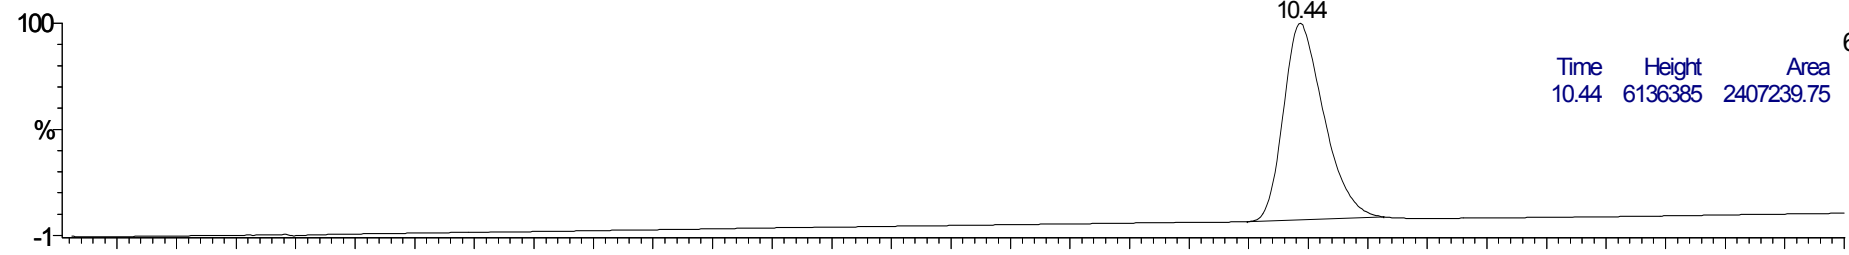

2: Diode Array  
TIC  
6.63e6

| Time  | Height  | Area       | Area%  |
|-------|---------|------------|--------|
| 10.44 | 6136385 | 2407239.75 | 100.00 |

2-6-3

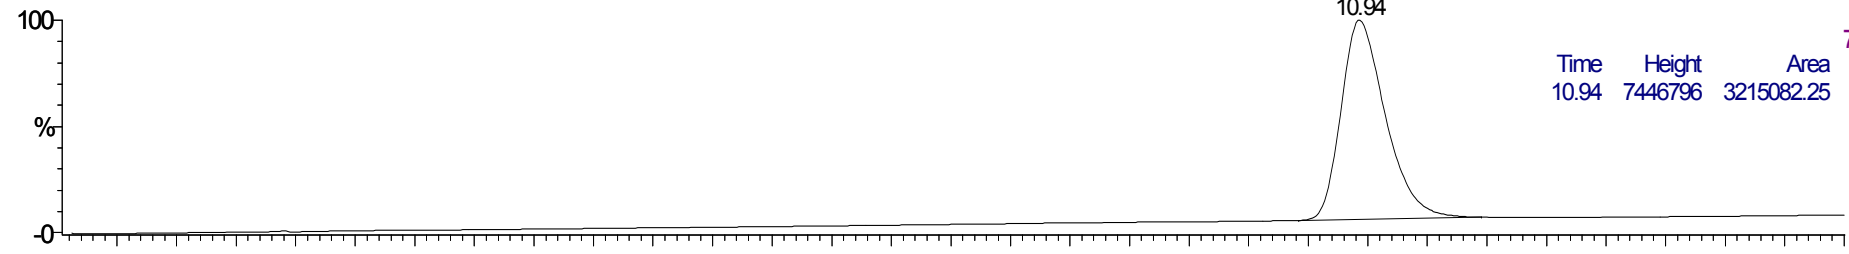

2: Diode Array  
TIC  
7.95e6

| Time  | Height  | Area       | Area%  |
|-------|---------|------------|--------|
| 10.94 | 7446796 | 3215082.25 | 100.00 |

2-6-7

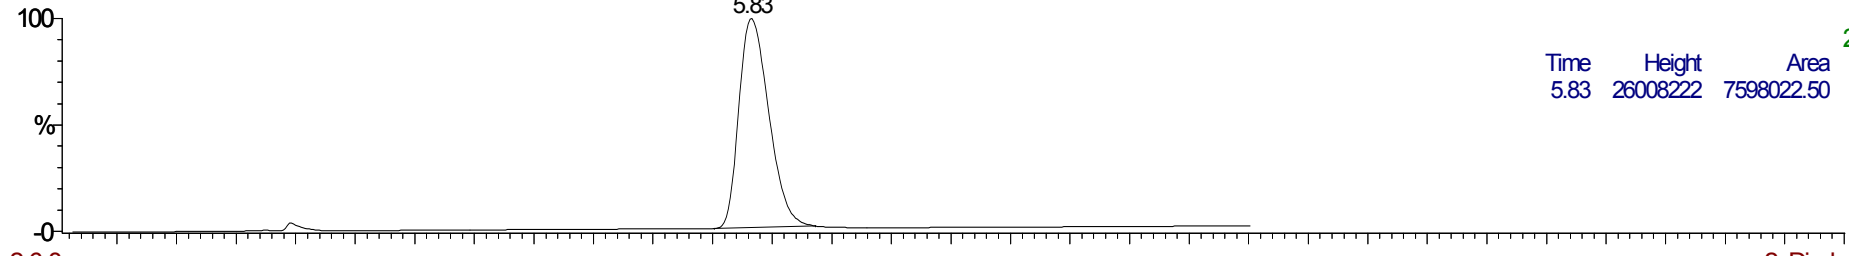

2: Diode Array  
TIC  
2.65e7

| Time | Height   | Area       | Area%  |
|------|----------|------------|--------|
| 5.83 | 26008222 | 7598022.50 | 100.00 |

2-6-8

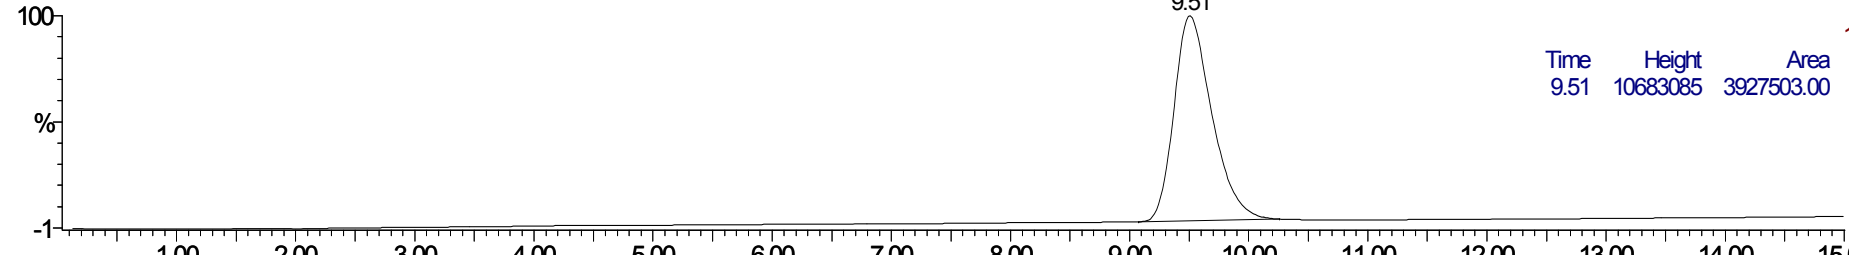

2: Diode Array  
TIC  
1.11e7

| Time | Height   | Area       | Area%  |
|------|----------|------------|--------|
| 9.51 | 10683085 | 3927503.00 | 100.00 |

Time

426

2-7-1 617 (10.390)

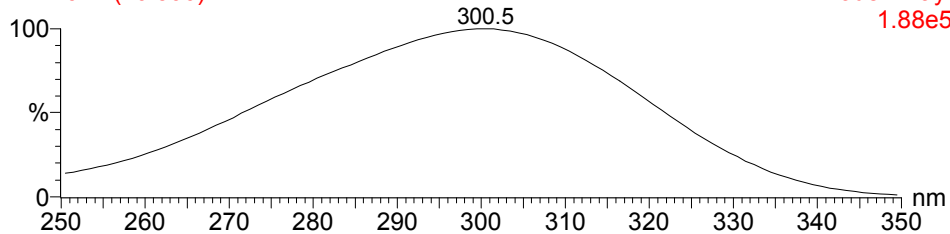

426

2: Diode Array 2-7-1 567 (10.421)

1.88e5

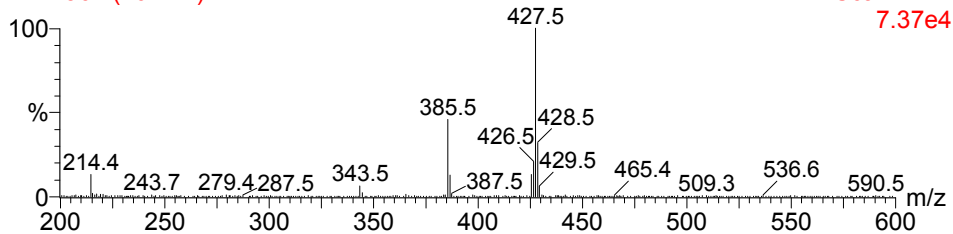

1: Scan AP+

7.37e4

408

2-7-2 801 (13.457)

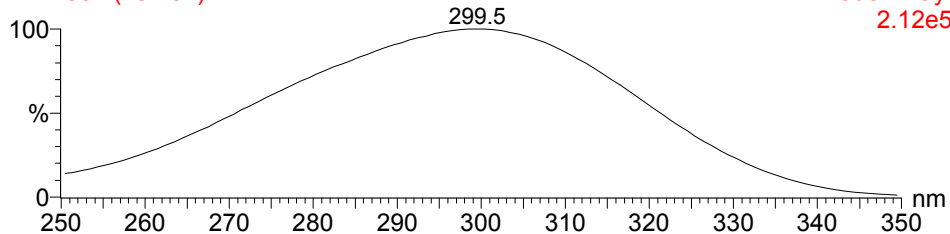

408

2: Diode Array 2-7-2 735 (13.501)

2.12e5

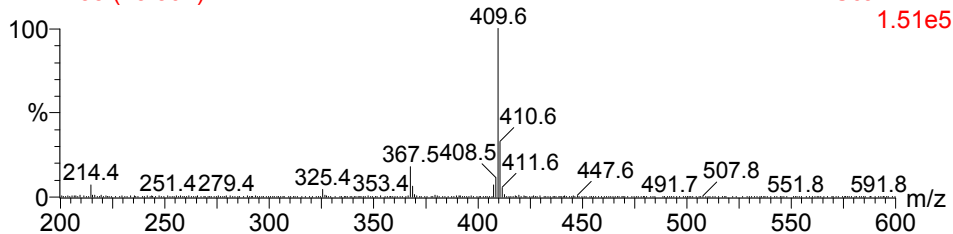

1: Scan AP+

1.51e5

426

2-7-3 826 (13.882)

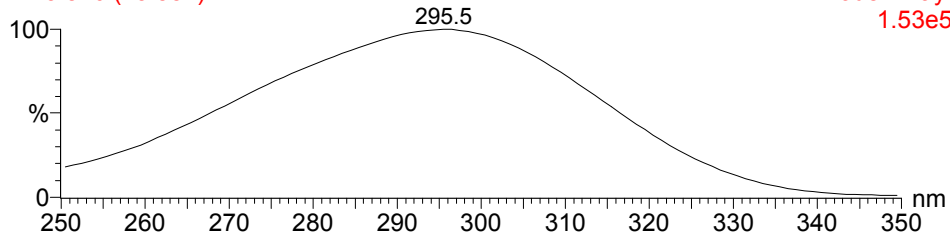

426

2: Diode Array 2-7-3 761 (13.977)

1.53e5

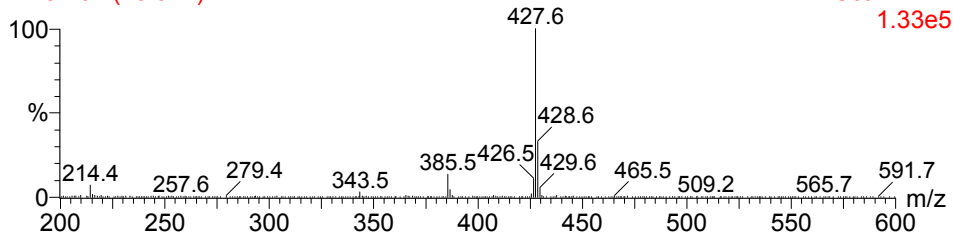

1: Scan AP+

1.33e5

444

2-7-7 427 (7.232)

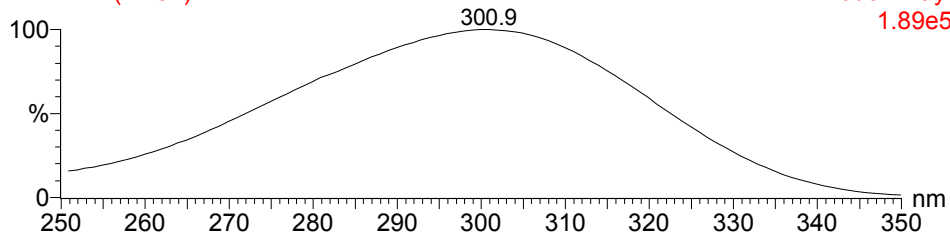

444

2: Diode Array 2-7-7 396 (7.286)

1.89e5

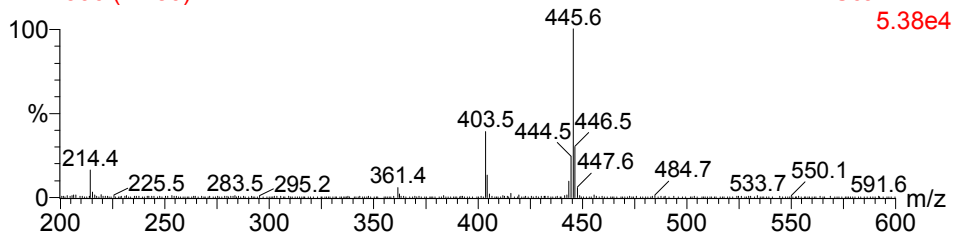

1: Scan AP+

5.38e4

444

2-7-8 716 (12.037)

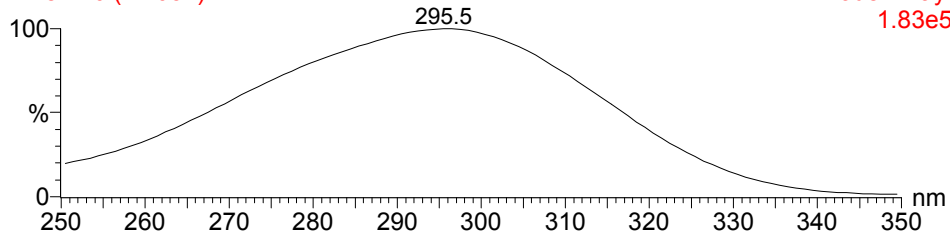

444

2: Diode Array 2-7-8 662 (12.162)

1.83e5

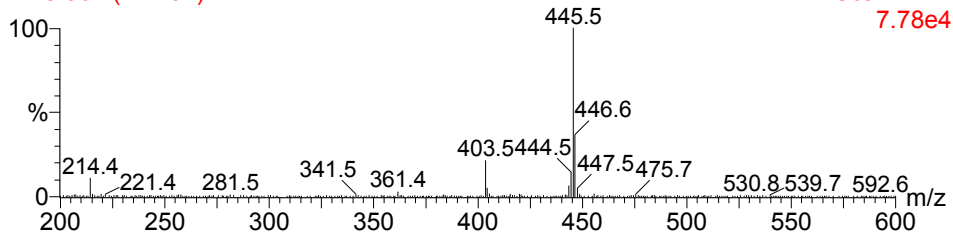

1: Scan AP+

7.78e4

2-7-1

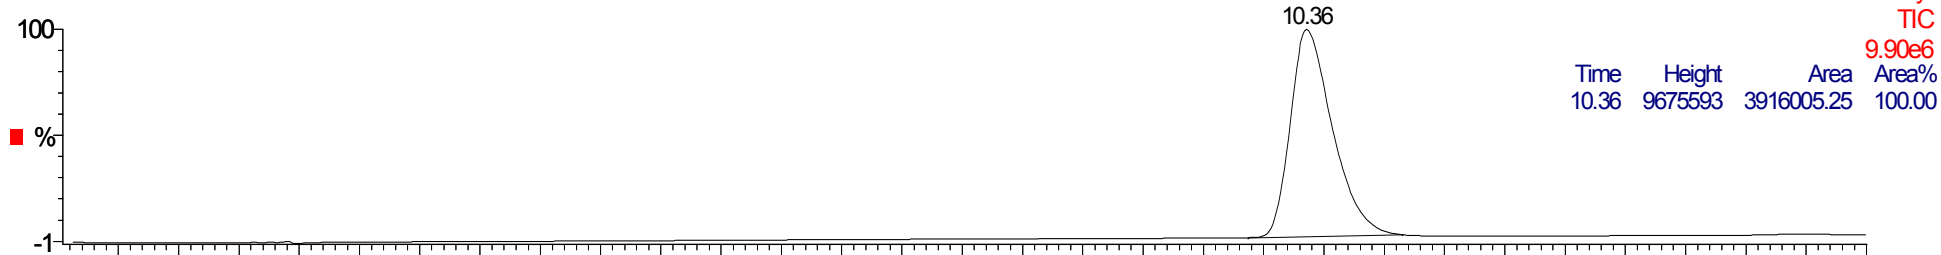

2-7-2

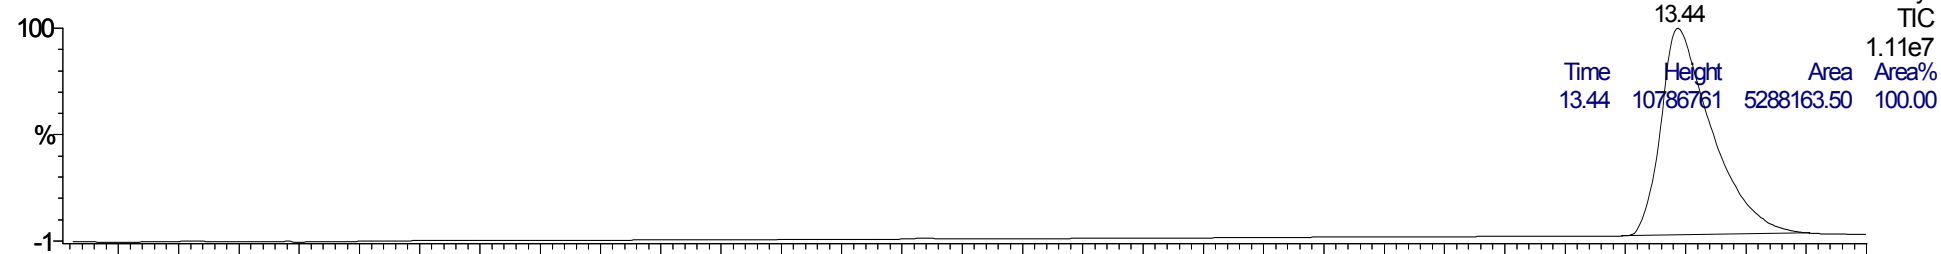

2-7-3

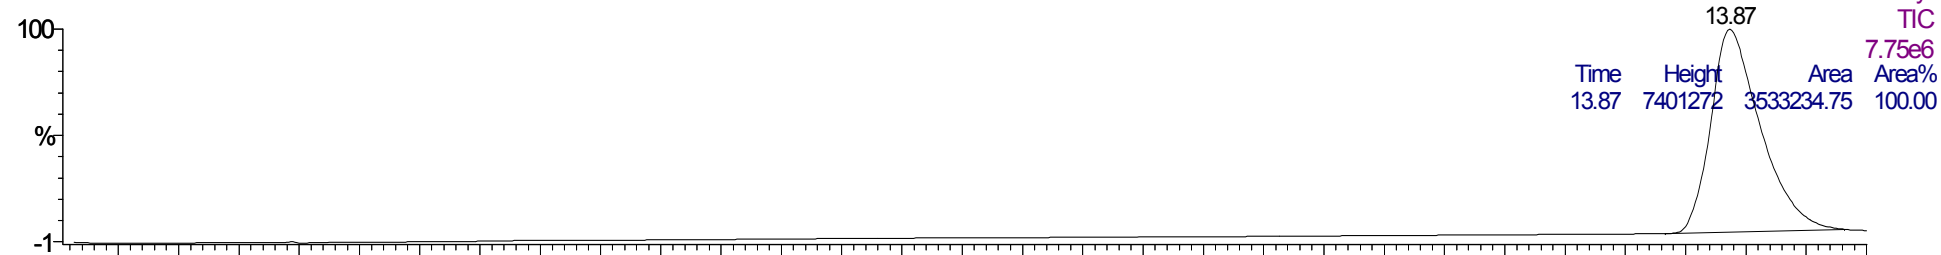

2-7-7

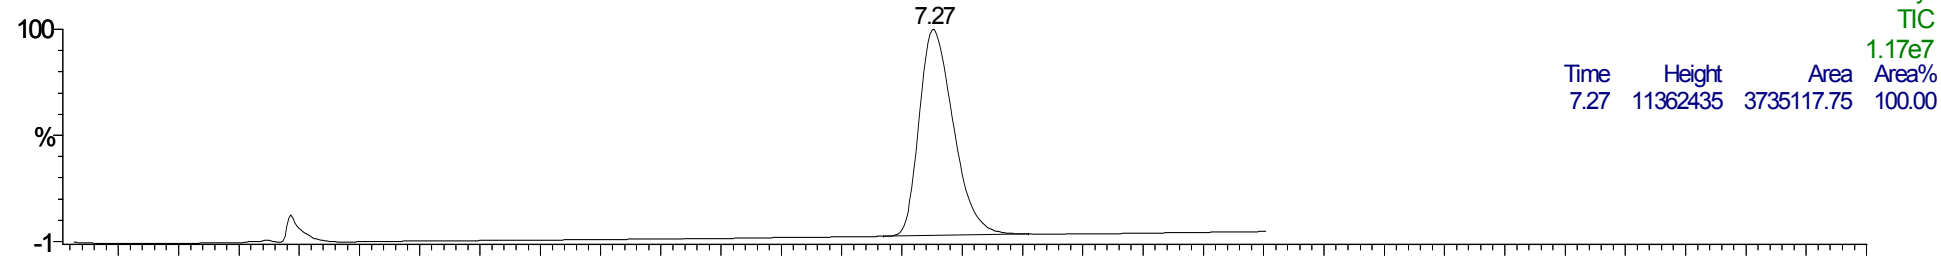

2-7-8

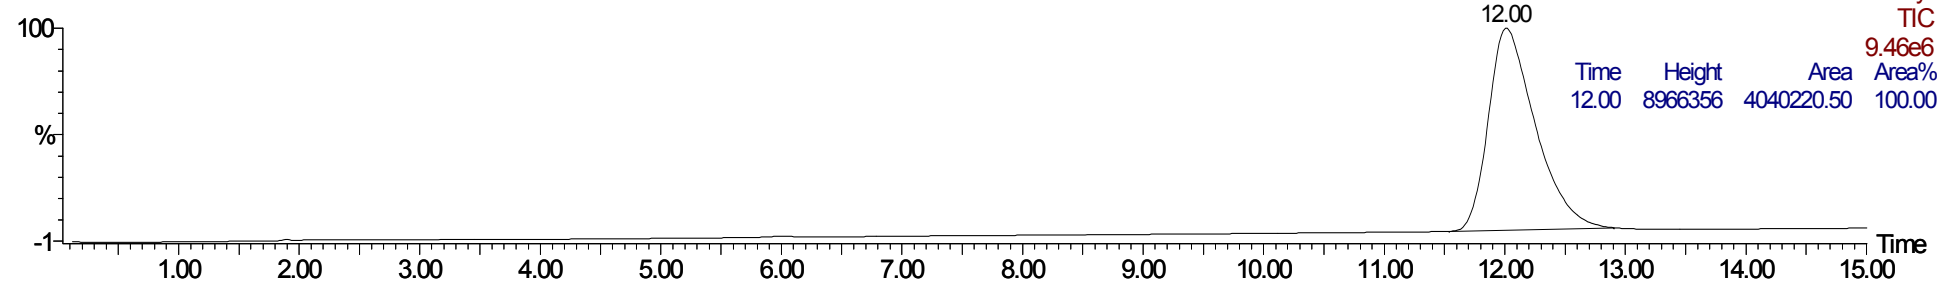



462

2-8-1 491 (8.288)

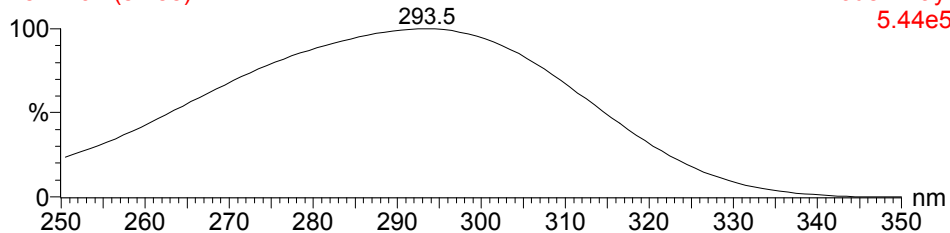

462

2: Diode Array 2-8-1 451 (8.294)

5.44e5

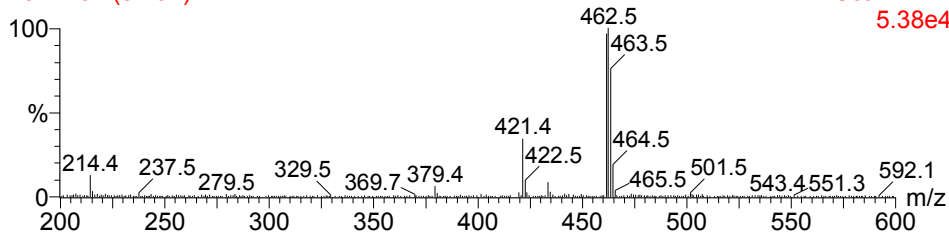

1: Scan AP+

5.38e4

444

2-8-2 578 (9.738)

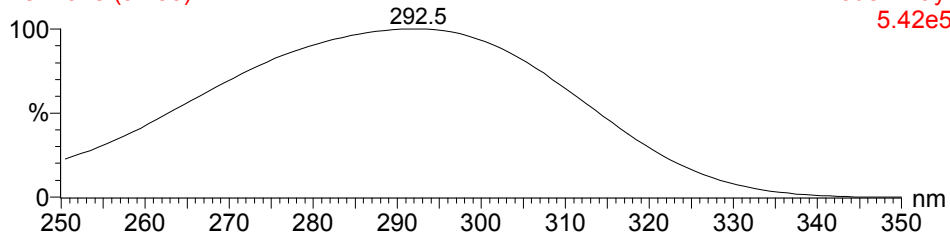

444

2: Diode Array 2-8-2 529 (9.724)

5.42e5

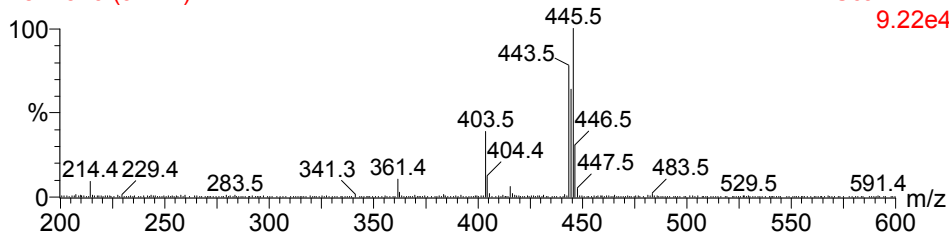

1: Scan AP+

9.22e4

462

2-8-3 579 (9.757)

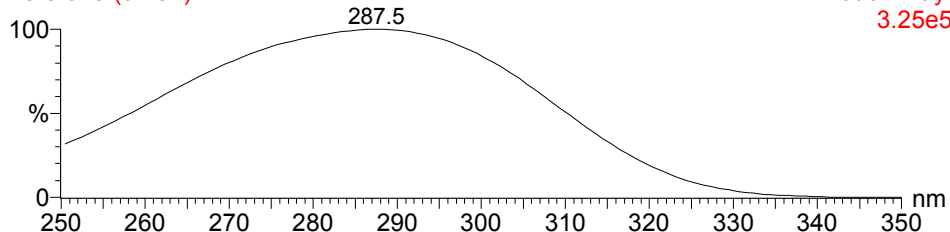

462

2: Diode Array 2-8-3 532 (9.779)

3.25e5

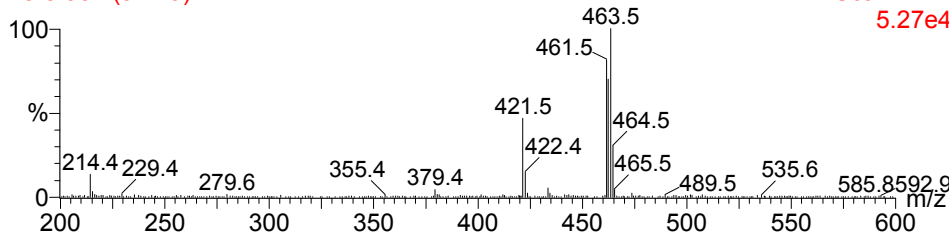

1: Scan AP+

5.27e4

480

2-8-7 369 (6.253)

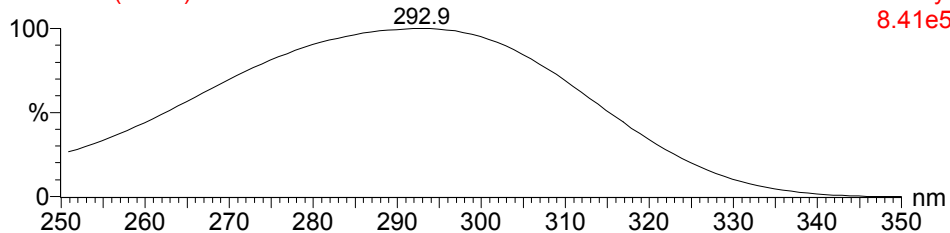

480

2: Diode Array 2-8-7 342 (6.295)

8.41e5

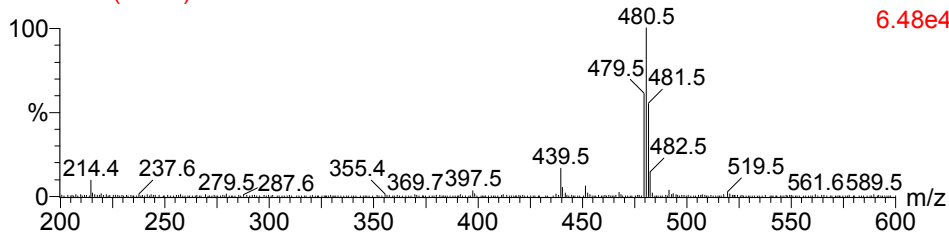

1: Scan AP+

6.48e4

480

2-8-8 549 (9.260)

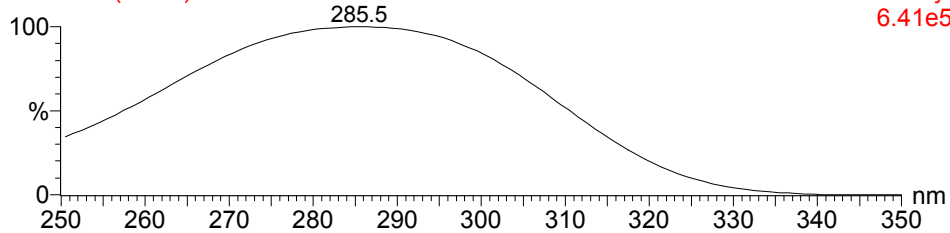

480

2: Diode Array 2-8-8 506 (9.302)

6.41e5

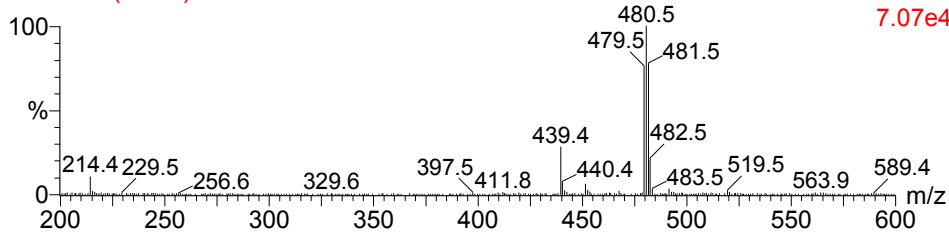

1: Scan AP+

7.07e4

2-8-1

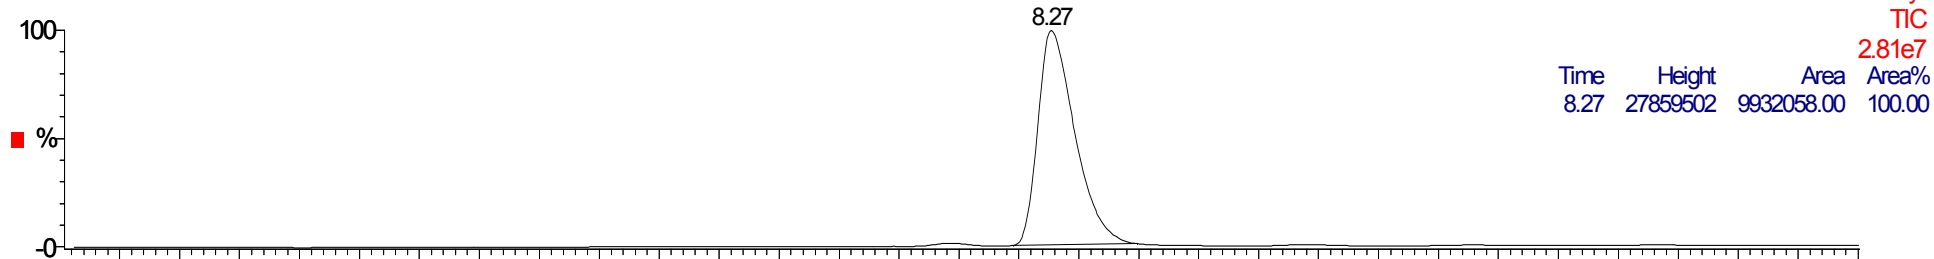

2-8-2

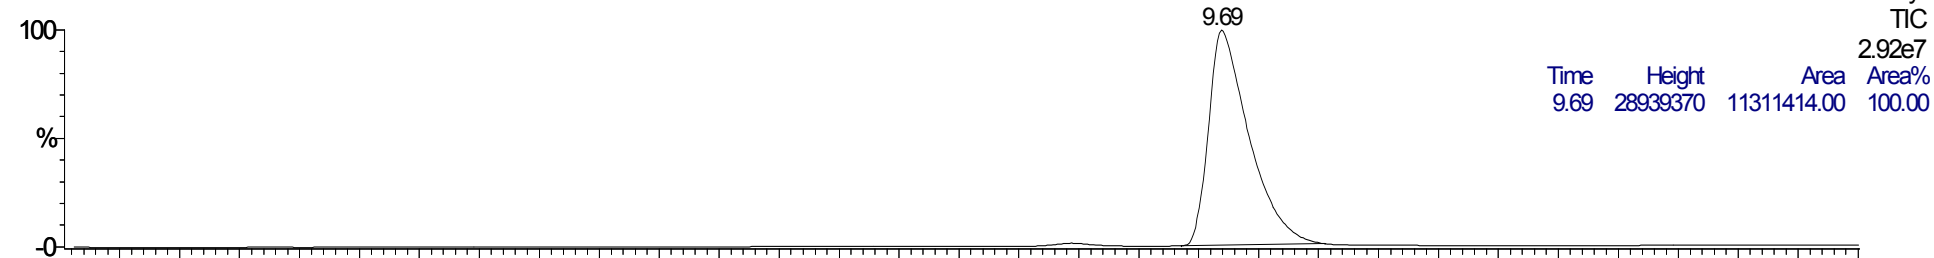

2-8-3

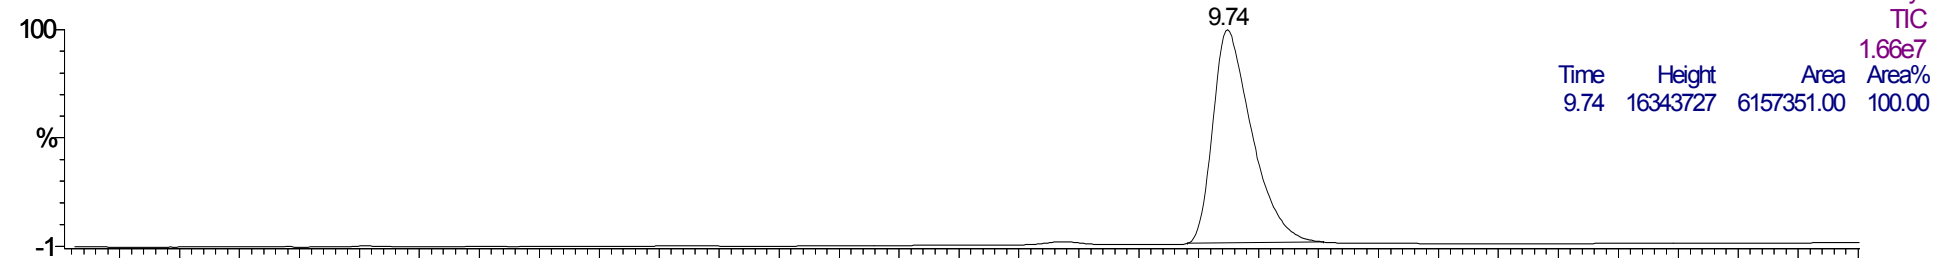

2-8-7

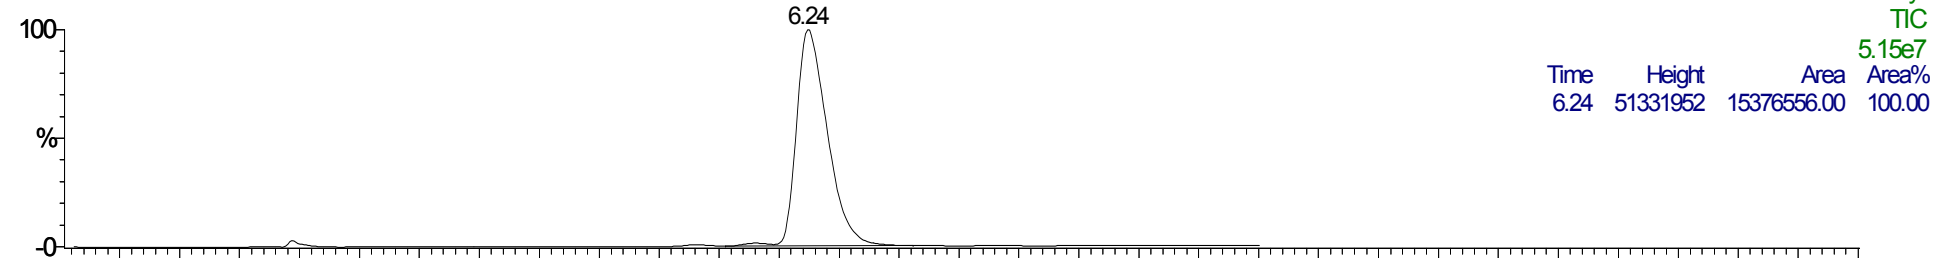

2-8-8

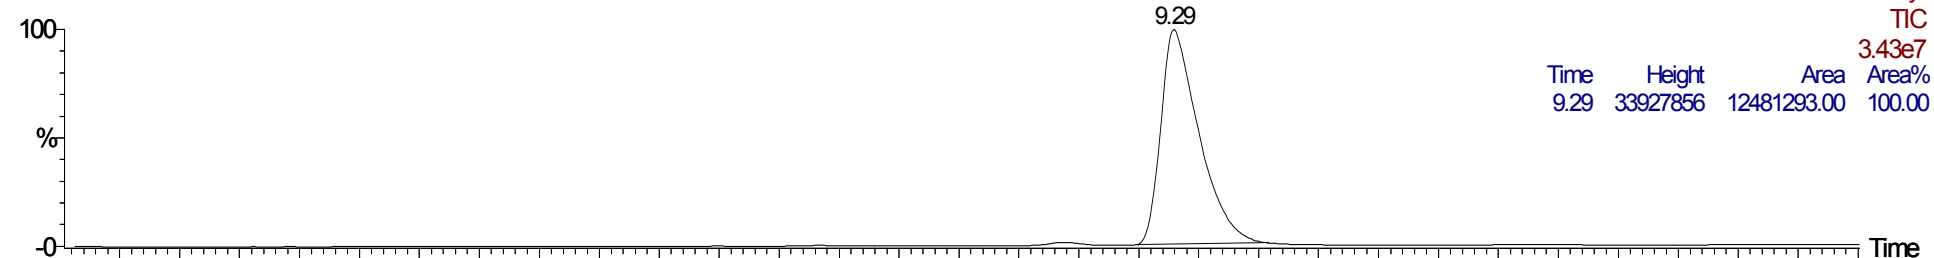

2: Diode Array  
TIC  
2.81e7

| Time | Height   | Area       | Area%  |
|------|----------|------------|--------|
| 8.27 | 27859502 | 9932058.00 | 100.00 |

2: Diode Array  
TIC  
2.92e7

| Time | Height   | Area        | Area%  |
|------|----------|-------------|--------|
| 9.69 | 28939370 | 11311414.00 | 100.00 |

2: Diode Array  
TIC  
1.66e7

| Time | Height   | Area       | Area%  |
|------|----------|------------|--------|
| 9.74 | 16343727 | 6157351.00 | 100.00 |

2: Diode Array  
TIC  
5.15e7

| Time | Height   | Area        | Area%  |
|------|----------|-------------|--------|
| 6.24 | 51331952 | 15376556.00 | 100.00 |

2: Diode Array  
TIC  
3.43e7

| Time | Height   | Area        | Area%  |
|------|----------|-------------|--------|
| 9.29 | 33927856 | 12481293.00 | 100.00 |

Time

462

2-8-1 491 (8.288)

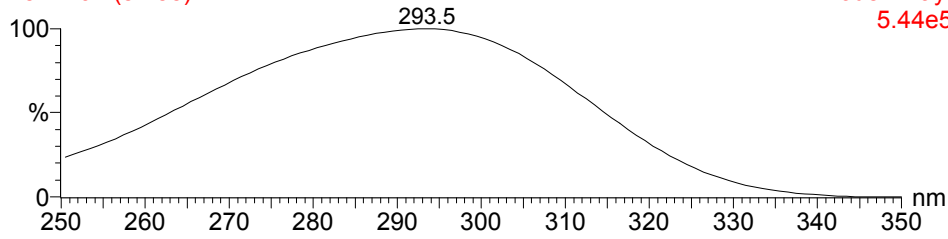

462

2: Diode Array 2-8-1 451 (8.294)

5.44e5

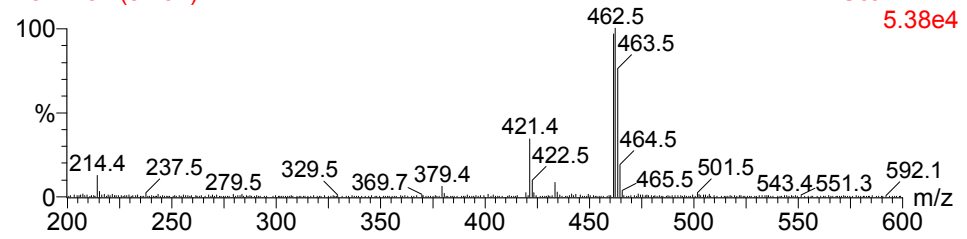

1: Scan AP+ 5.38e4

444

2-8-2 578 (9.738)

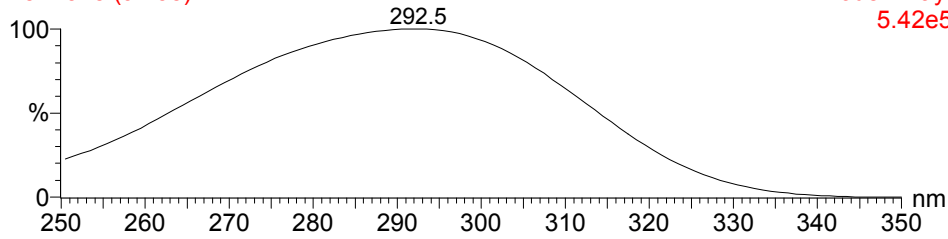

444

2: Diode Array 2-8-2 529 (9.724)

5.42e5

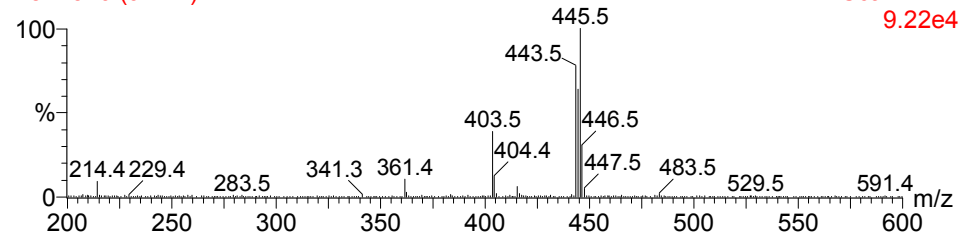

1: Scan AP+ 9.22e4

462

2-8-3 579 (9.757)

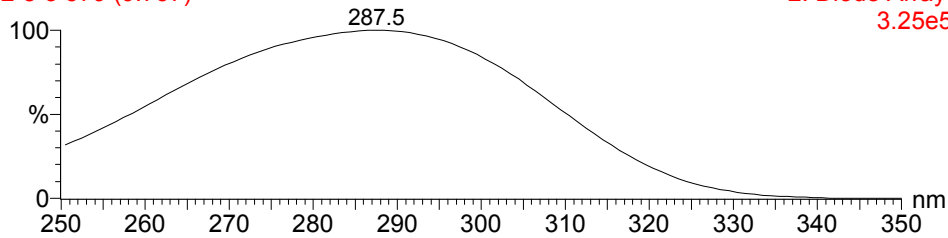

462

2: Diode Array 2-8-3 532 (9.779)

3.25e5

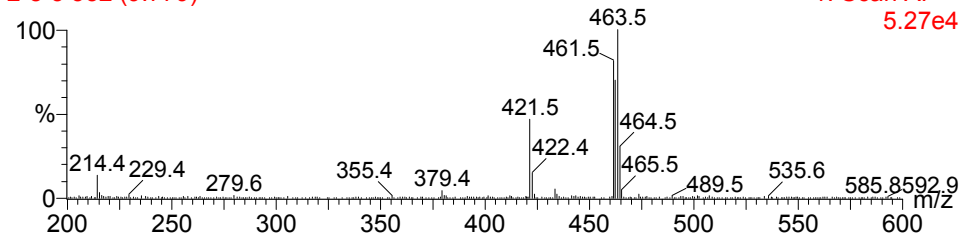

1: Scan AP+ 5.27e4

480

2-8-7 369 (6.253)

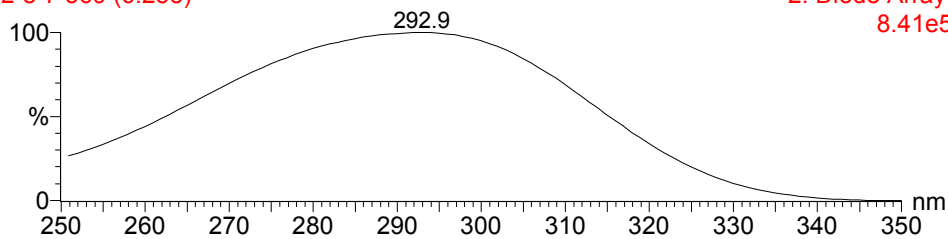

480

2: Diode Array 2-8-7 342 (6.295)

8.41e5

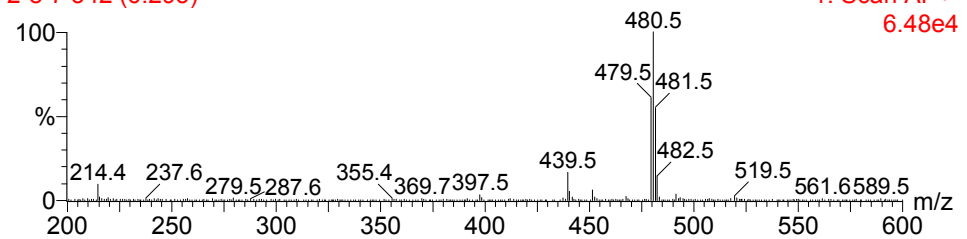

1: Scan AP+ 6.48e4

480

2-8-8 549 (9.260)

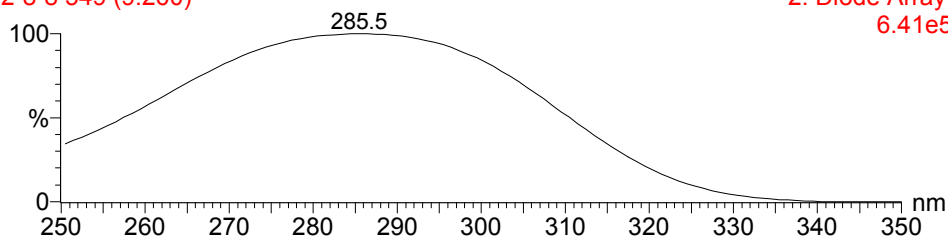

480

2: Diode Array 2-8-8 506 (9.302)

6.41e5

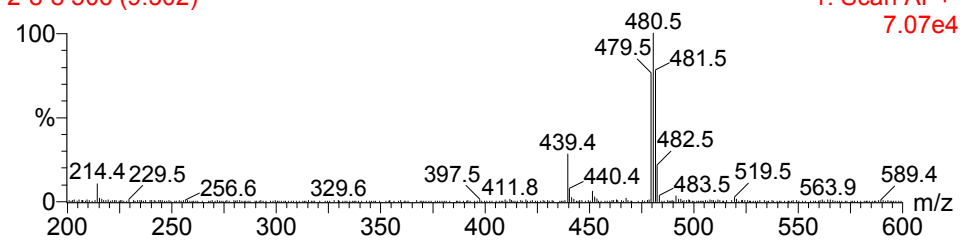

1: Scan AP+ 7.07e4

2-8-1



2-8-2



2-8-3



2-8-7



2-8-8



1.00 2.00 3.00 4.00 5.00 6.00 7.00 8.00 9.00 10.00 11.00 12.00 13.00 14.00 15.00

462

2-10-1 457 (7.722)

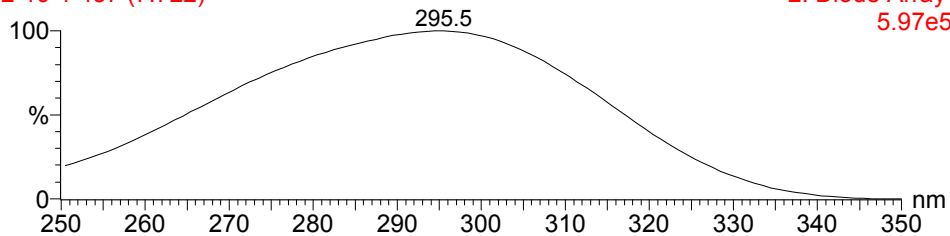

2: Diode Array 2-10-1 418 (7.689)

5.97e5

462

2-10-1 418 (7.689)

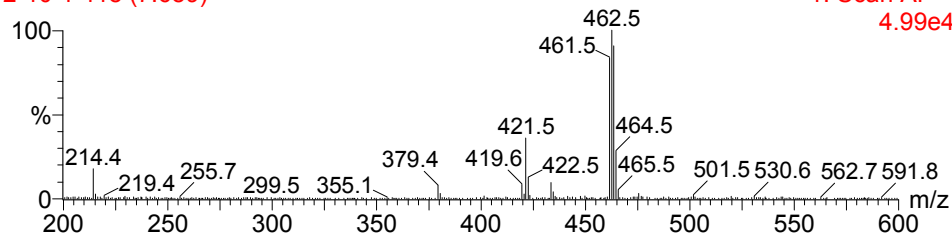

1: Scan AP+

4.99e4

444

2-10-2 540 (9.113)

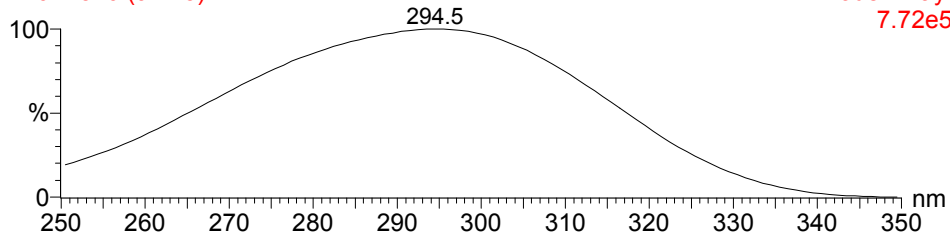

2: Diode Array 2-10-2 501 (9.211)

7.72e5

444

2-10-2 501 (9.211)

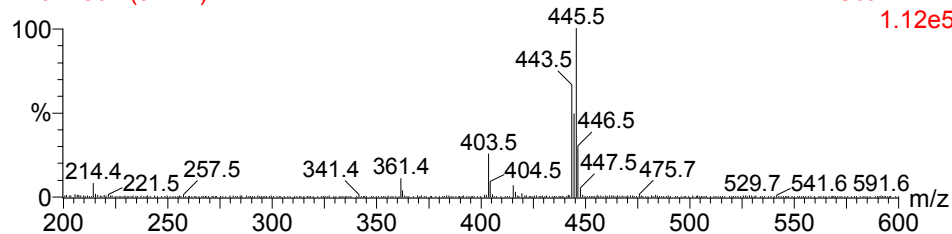

1: Scan AP+

1.12e5

462

2-10-3 556 (9.370)

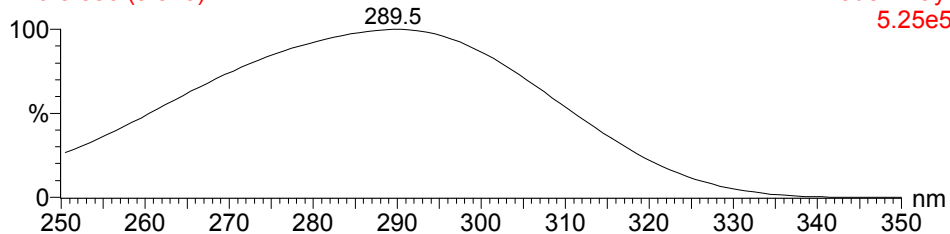

2: Diode Array 2-10-3 511 (9.394)

5.25e5

462

2-10-3 511 (9.394)

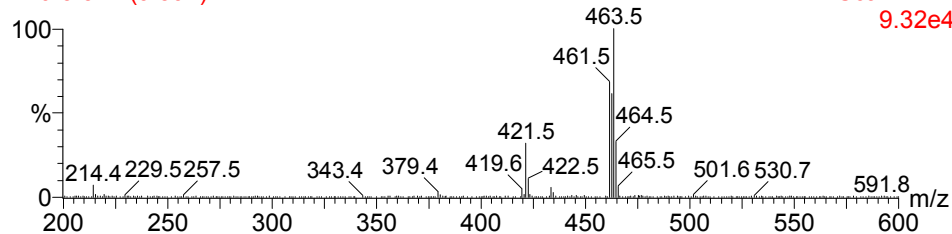

1: Scan AP+

9.32e4

480

2-10-7 344 (5.837)

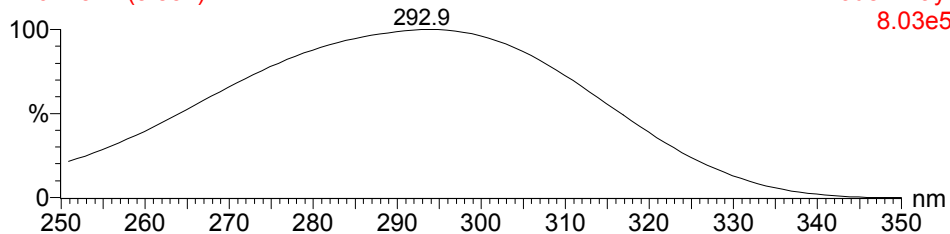

2: Diode Array 2-10-7 317 (5.837)

8.03e5

480

2-10-7 317 (5.837)

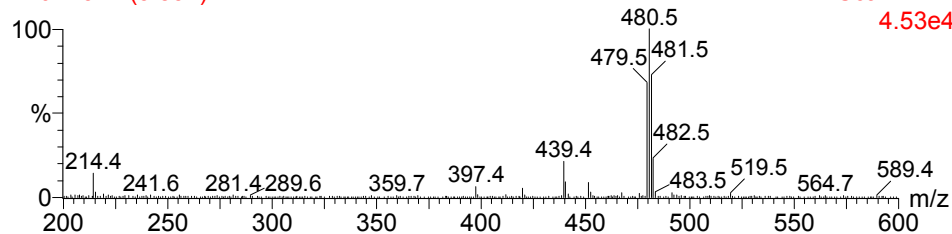

1: Scan AP+

4.53e4

480

2-10-8 518 (8.745)

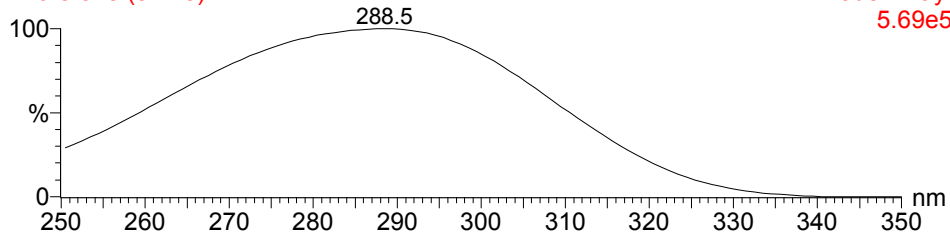

2: Diode Array 2-10-8 479 (8.807)

5.69e5

480

2-10-8 479 (8.807)

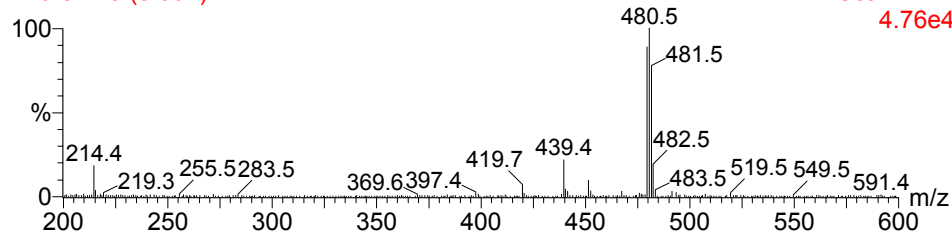

1: Scan AP+

4.76e4

2-10-1

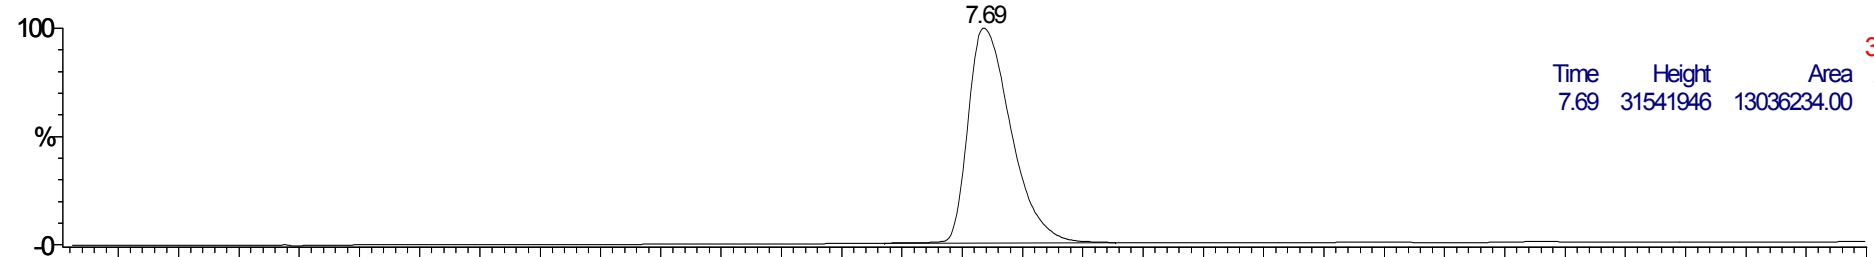

2: Diode Array  
TIC  
3.18e7

| Time | Height   | Area        | Area%  |
|------|----------|-------------|--------|
| 7.69 | 31541946 | 13036234.00 | 100.00 |

2-10-2

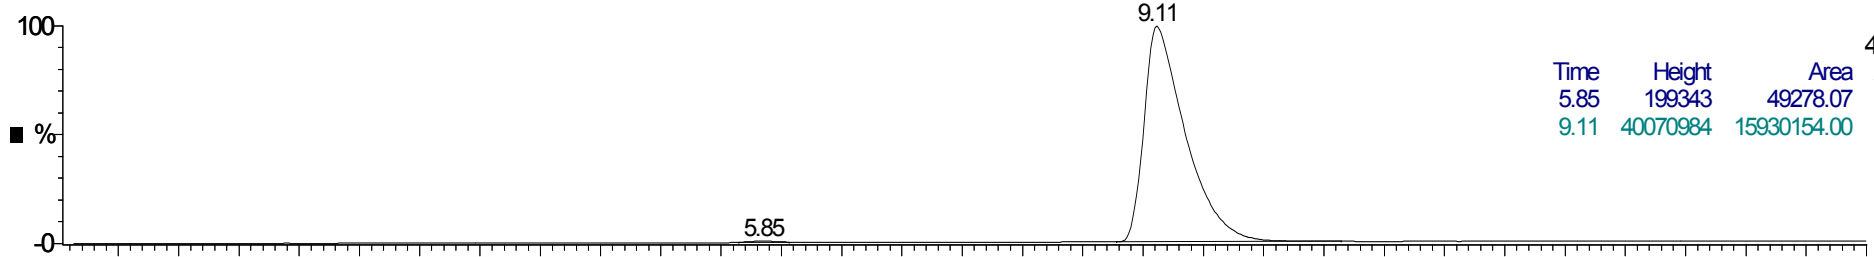

2: Diode Array  
TIC  
4.03e7

| Time | Height   | Area        | Area% |
|------|----------|-------------|-------|
| 5.85 | 199343   | 49278.07    | 0.31  |
| 9.11 | 40070984 | 15930154.00 | 99.69 |

2-10-3

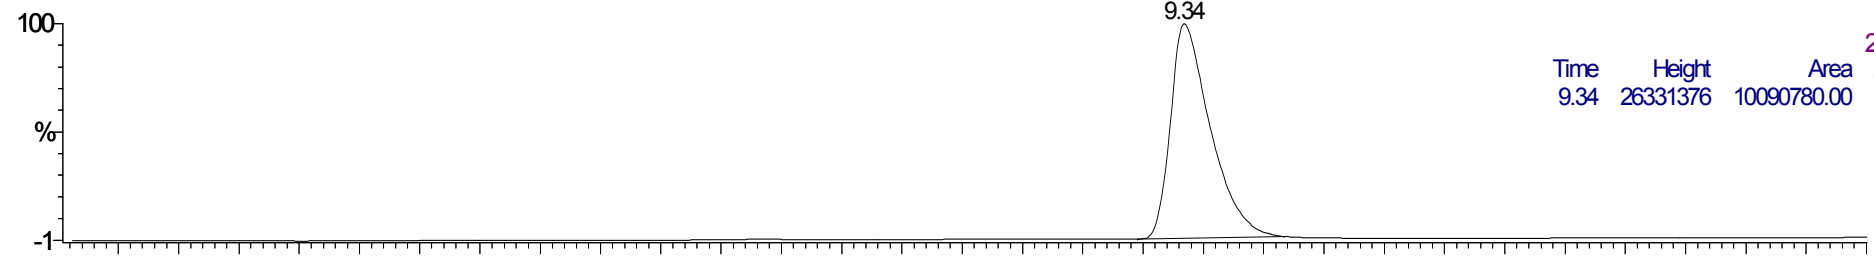

2: Diode Array  
TIC  
2.66e7

| Time | Height   | Area        | Area%  |
|------|----------|-------------|--------|
| 9.34 | 26331376 | 10090780.00 | 100.00 |

2-10-7

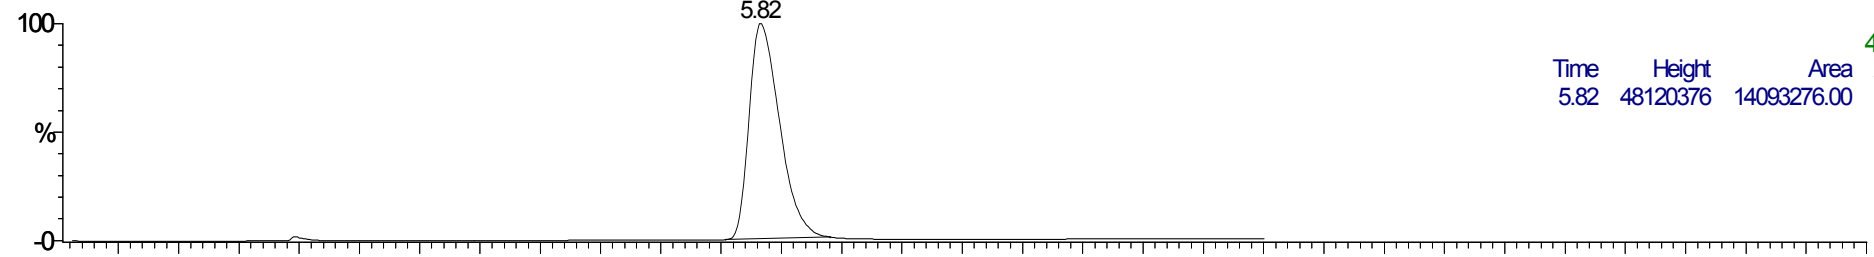

2: Diode Array  
TIC  
4.85e7

| Time | Height   | Area        | Area%  |
|------|----------|-------------|--------|
| 5.82 | 48120376 | 14093276.00 | 100.00 |

2-10-8

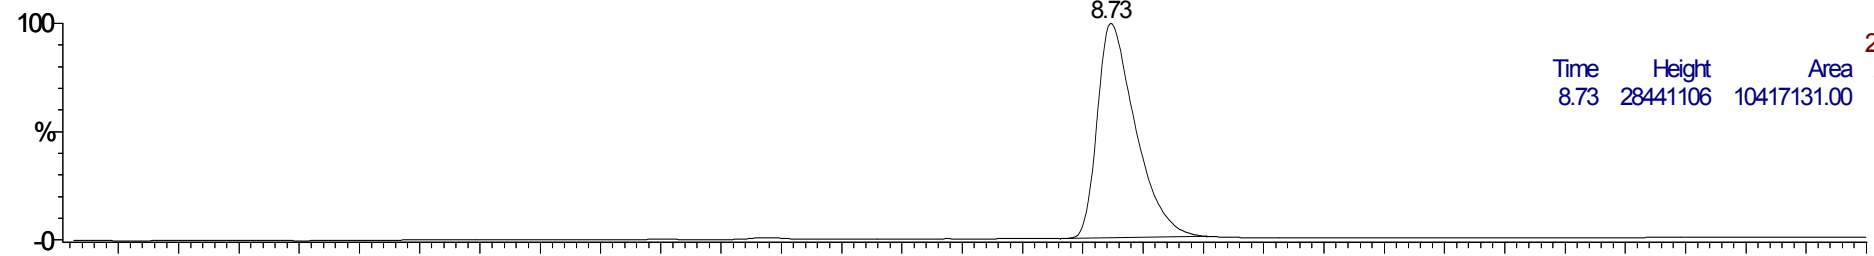

2: Diode Array  
TIC  
2.87e7

| Time | Height   | Area        | Area%  |
|------|----------|-------------|--------|
| 8.73 | 28441106 | 10417131.00 | 100.00 |

Time

444

2-11-1 552 (9.300)

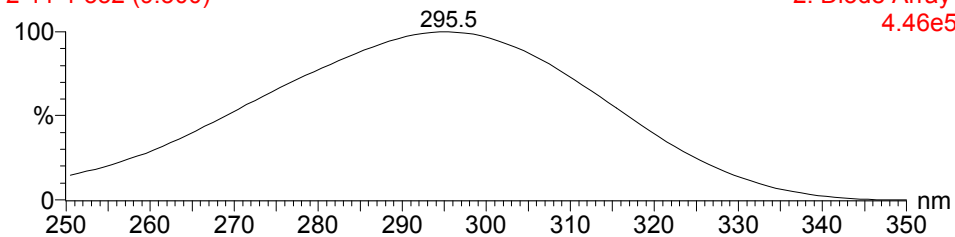

444

2: Diode Array 2-11-1 508 (9.339)

4.46e5

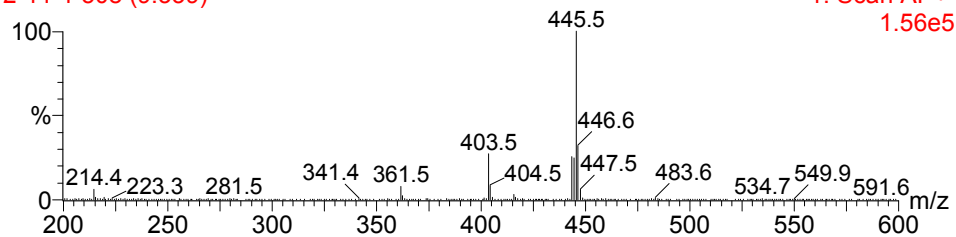

1: Scan AP+

1.56e5

426

2-11-2 642 (10.813)

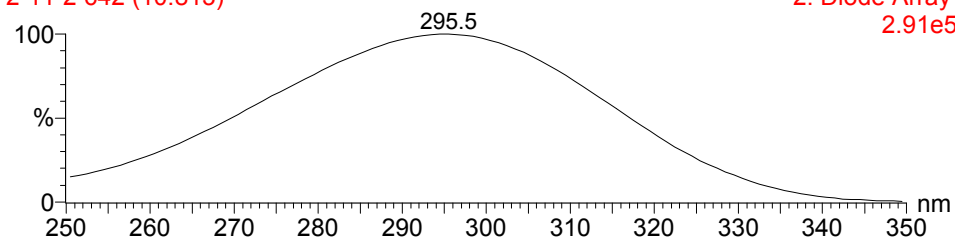

426

2: Diode Array 2-11-2 589 (10.824)

2.91e5

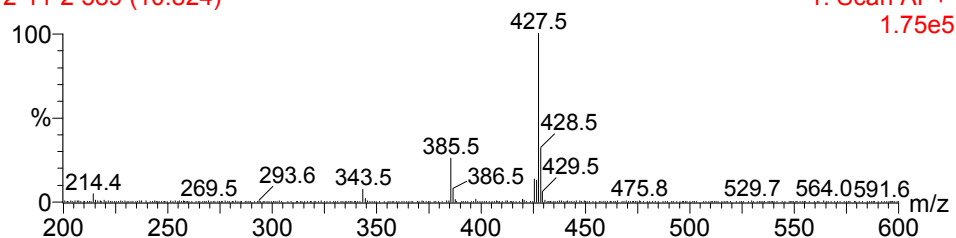

1: Scan AP+

1.75e5

444

2-11-3 585 (9.850)

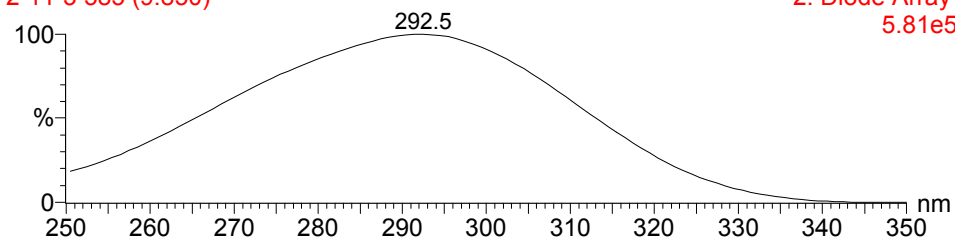

444

2: Diode Array 2-11-3 537 (9.871)

5.81e5

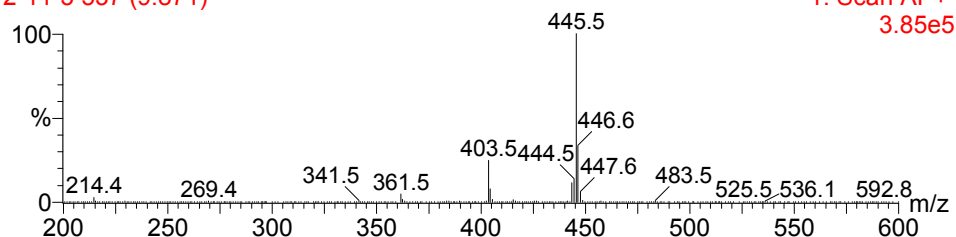

1: Scan AP+

3.85e5

462

2-11-7 404 (6.833)

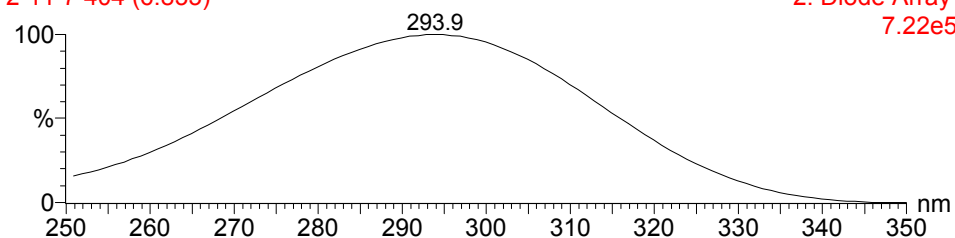

462

2: Diode Array 2-11-7 374 (6.883)

7.22e5

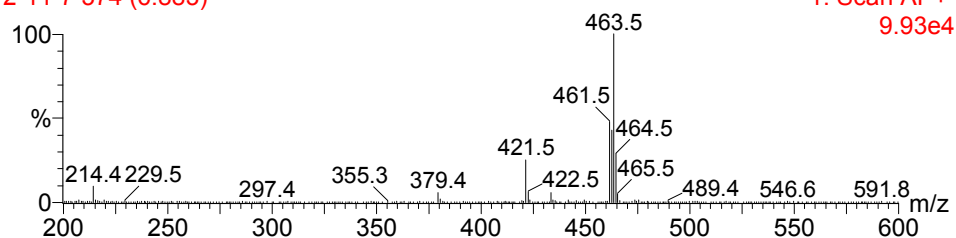

1: Scan AP+

9.93e4

462

2-11-8 554 (9.342)

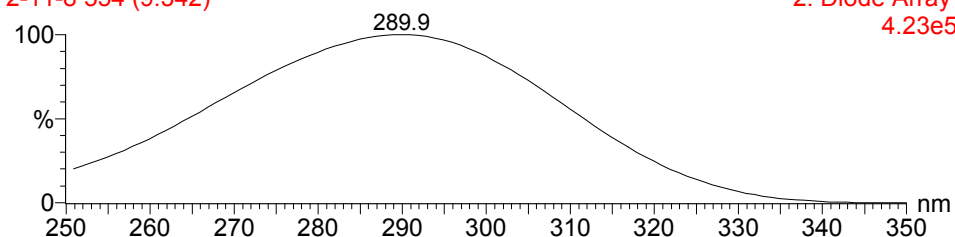

462

2: Diode Array 2-11-8 509 (9.357)

4.23e5

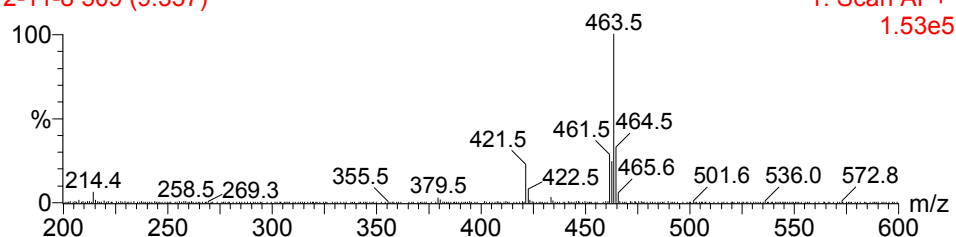

1: Scan AP+

1.53e5

2-11-1

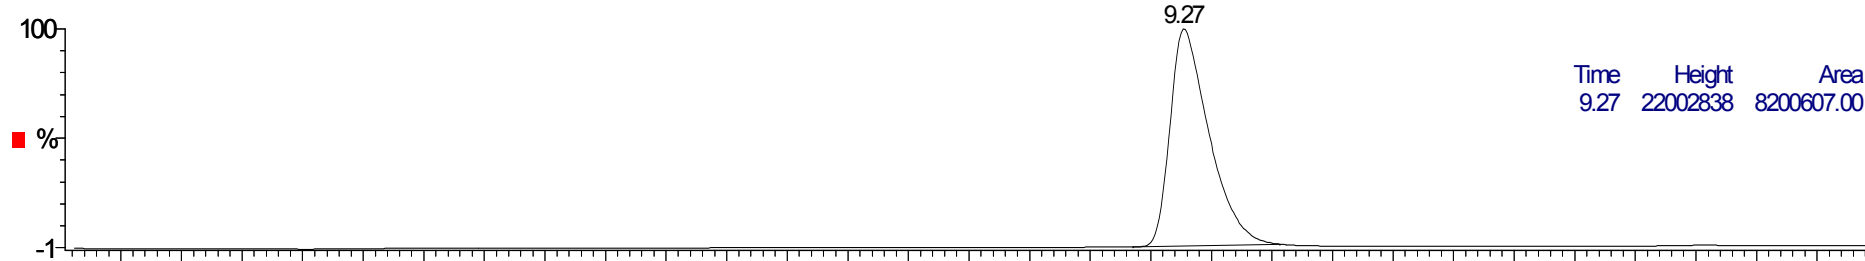

2-11-2

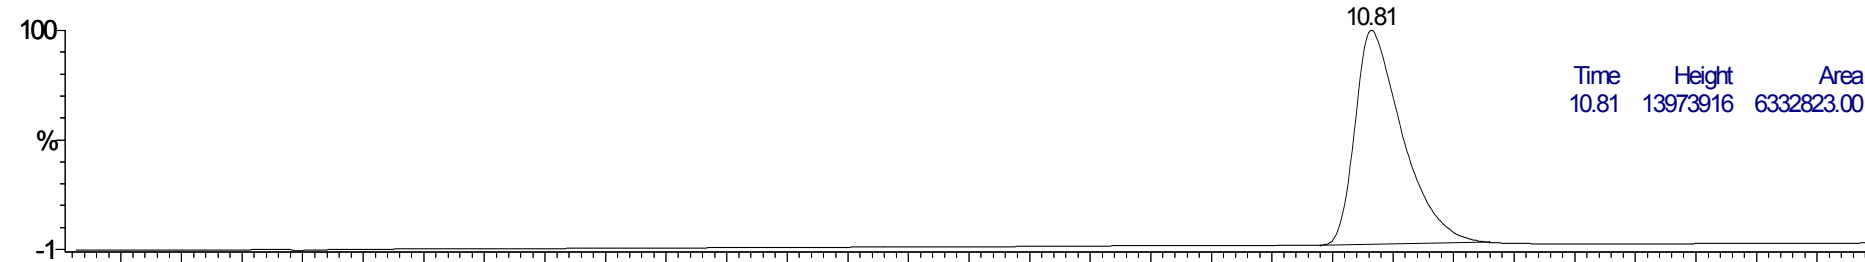

2-11-3

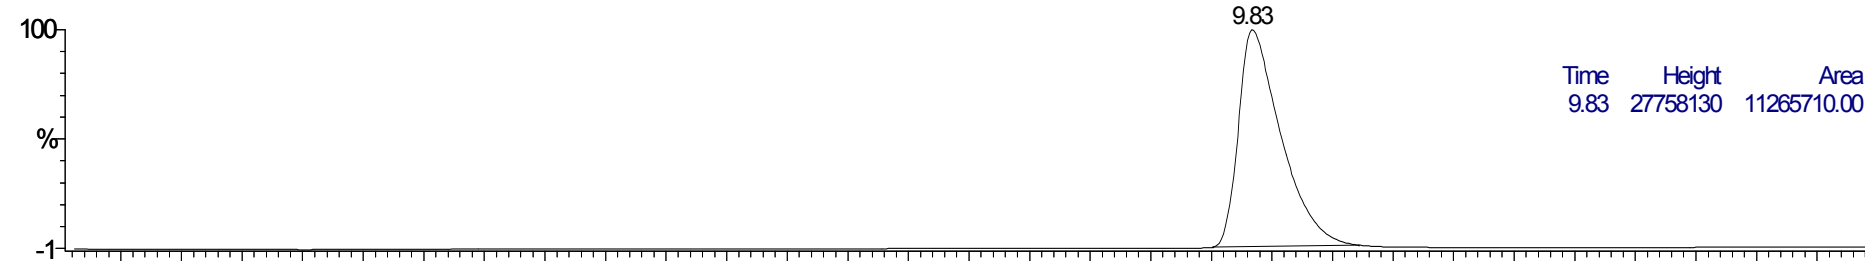

2-11-7

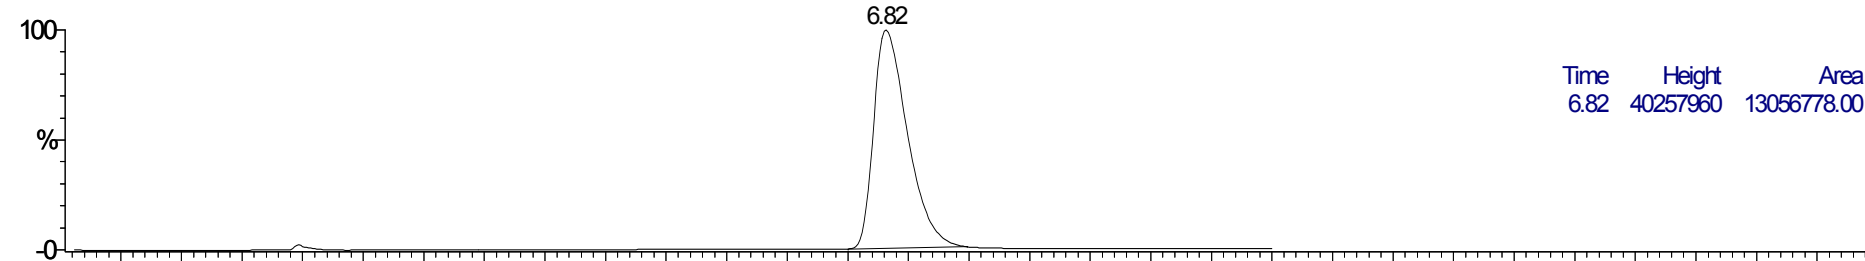

2-11-8

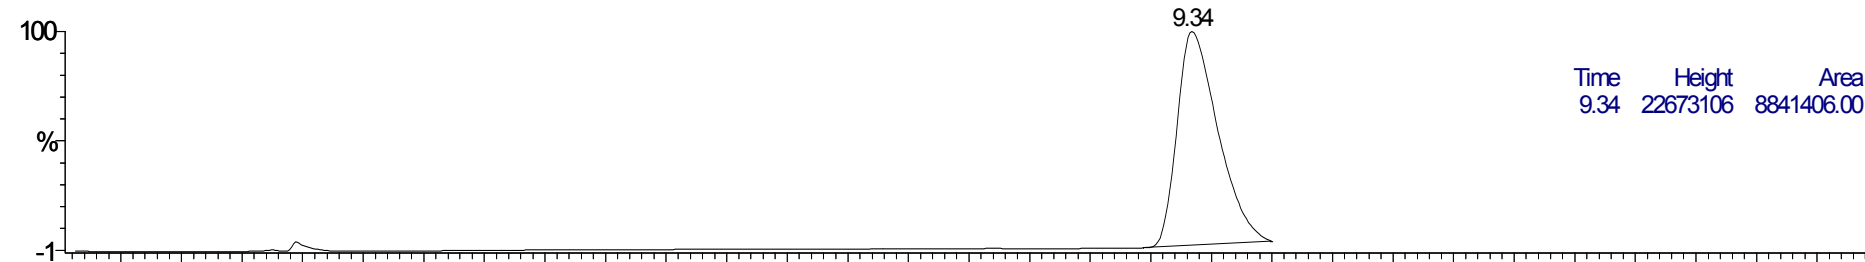

Time



480

311-99 821 (13.805)

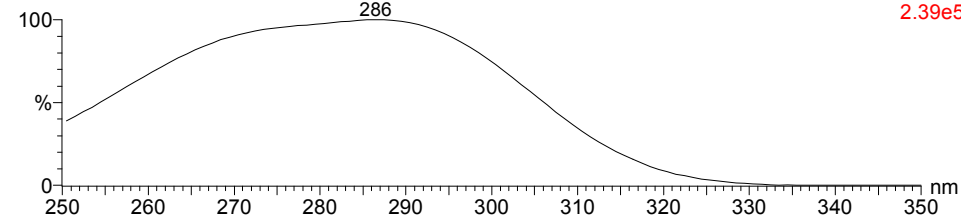

480

2: Diode Array 311-99 750 (13.780)

2.39e5

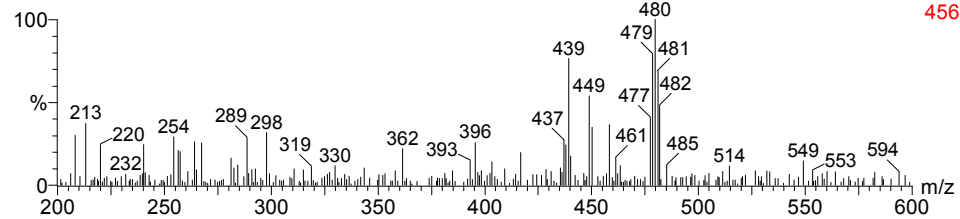

1: Scan AP+ 456

462

312-99 997 (16.727)

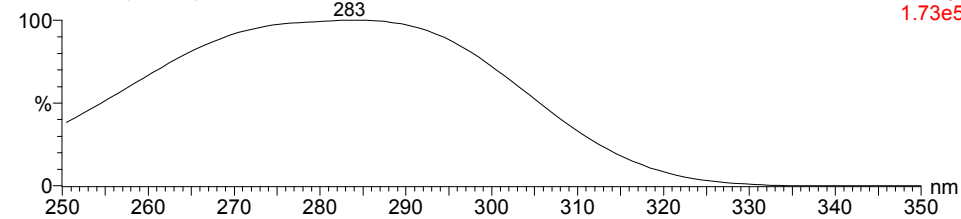

462

2: Diode Array 312-99 915 (16.808)

1.73e5

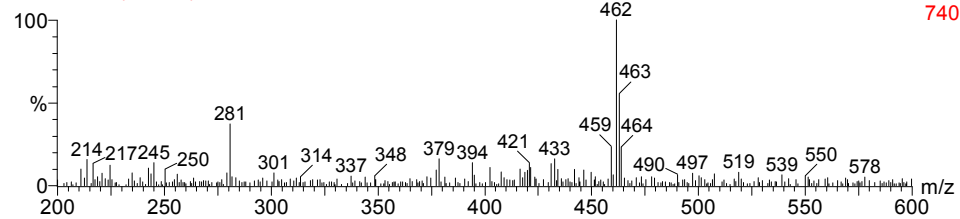

1: Scan AP+ 740

480

313-99 1024 (17.182)

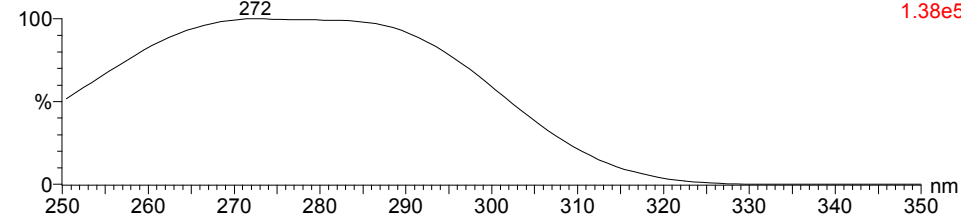

480

2: Diode Array 313-99 942 (17.309)

1.38e5

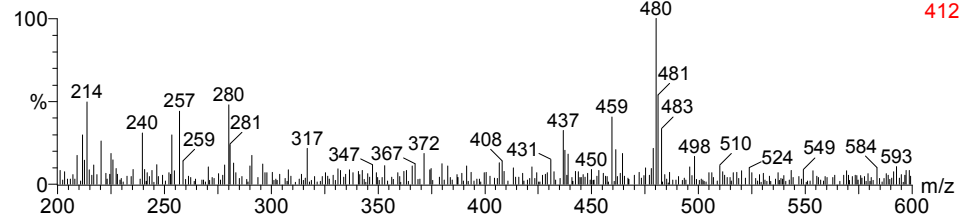

1: Scan AP+ 412

498

317-99 604 (10.187)

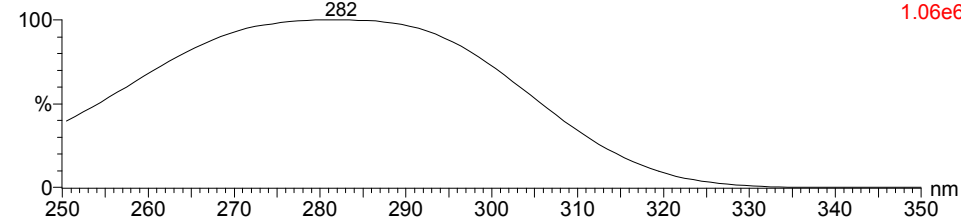

498

2: Diode Array 317-99 556 (10.230)

1.06e6

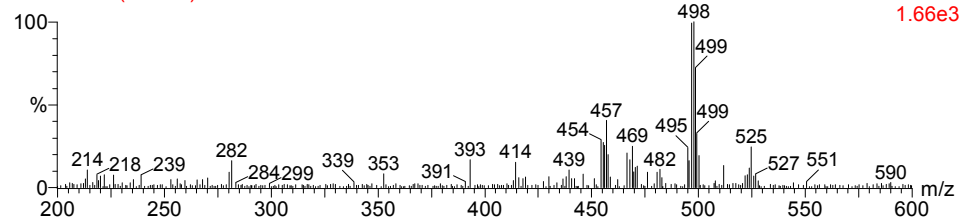

1: Scan AP+ 1.66e3

498

318-2 980 (16.452)

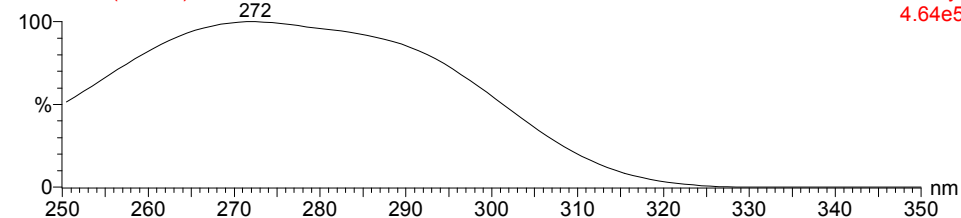

498

2: Diode Array 318-99 855 (15.706)

4.64e5

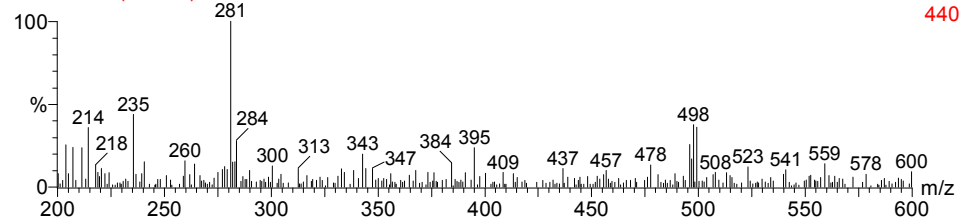

1: Scan AP+ 440

311-99

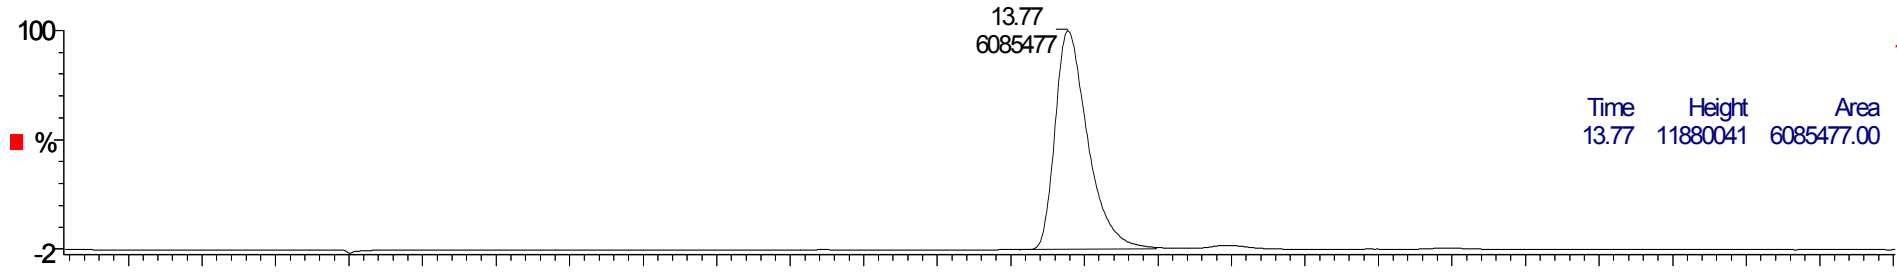

13.77  
6085477

| Time  | Height   | Area       | Area%  |
|-------|----------|------------|--------|
| 13.77 | 11880041 | 6085477.00 | 100.00 |

2: Diode Array  
TIC  
1.19e7  
Area

312-99

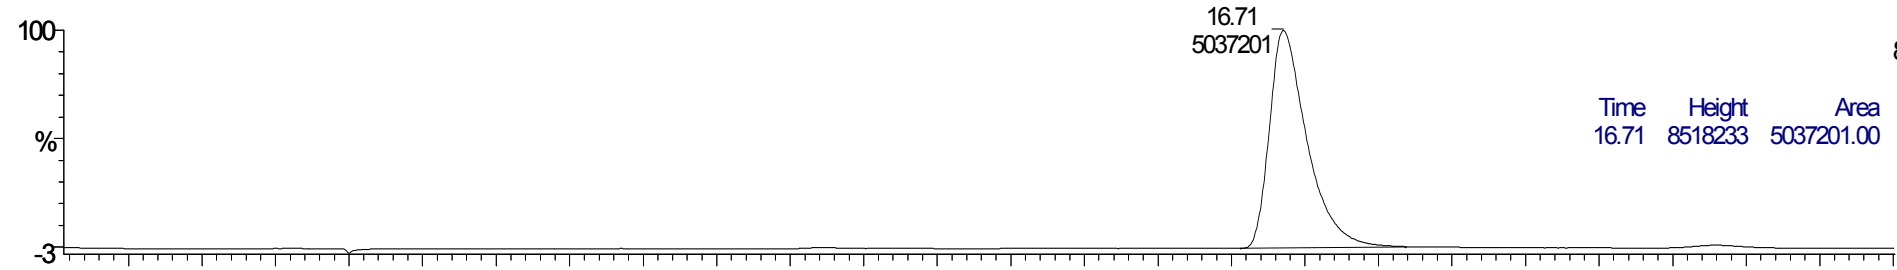

16.71  
5037201

| Time  | Height  | Area       | Area%  |
|-------|---------|------------|--------|
| 16.71 | 8518233 | 5037201.00 | 100.00 |

2: Diode Array  
TIC  
8.49e6  
Area

313-99

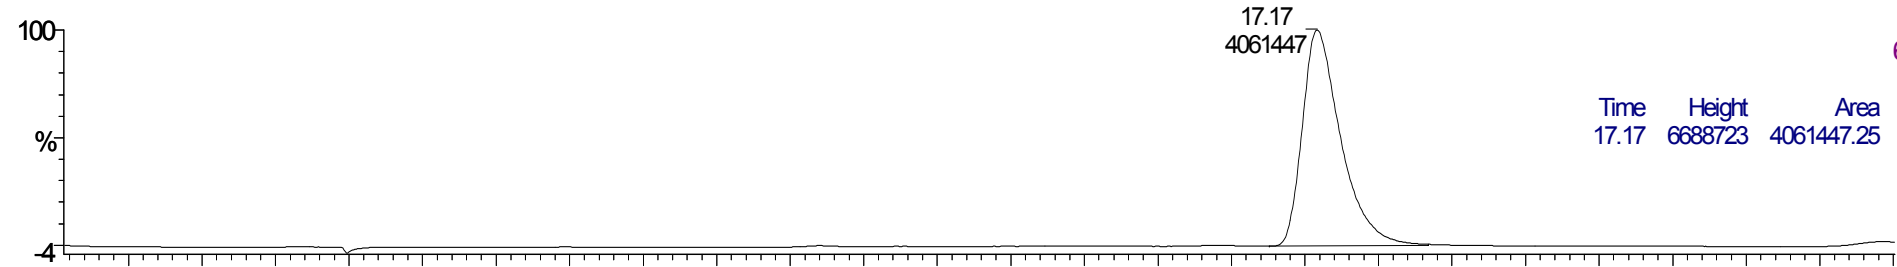

17.17  
4061447

| Time  | Height  | Area       | Area%  |
|-------|---------|------------|--------|
| 17.17 | 6688723 | 4061447.25 | 100.00 |

2: Diode Array  
TIC  
6.67e6  
Area

317-99

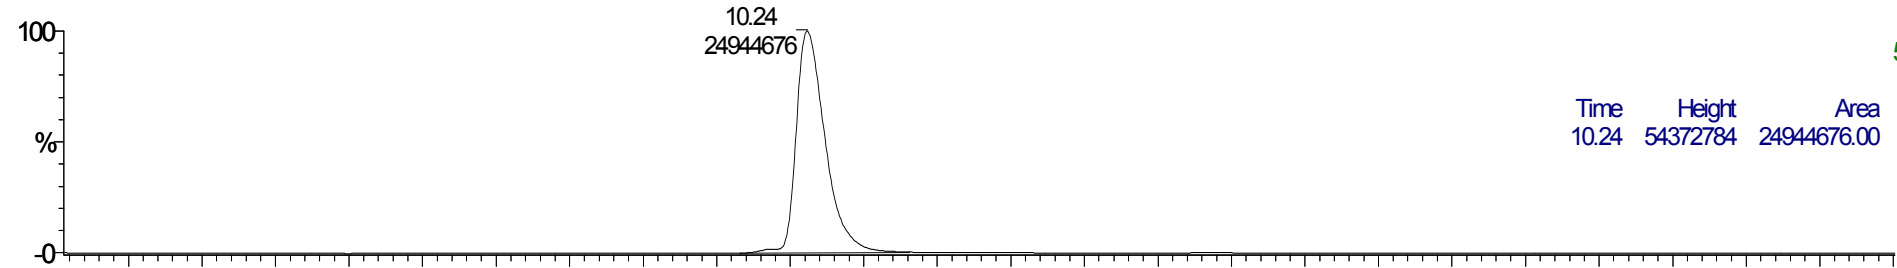

10.24  
24944676

| Time  | Height   | Area        | Area%  |
|-------|----------|-------------|--------|
| 10.24 | 54372784 | 24944676.00 | 100.00 |

2: Diode Array  
TIC  
5.43e7  
Area

318-2

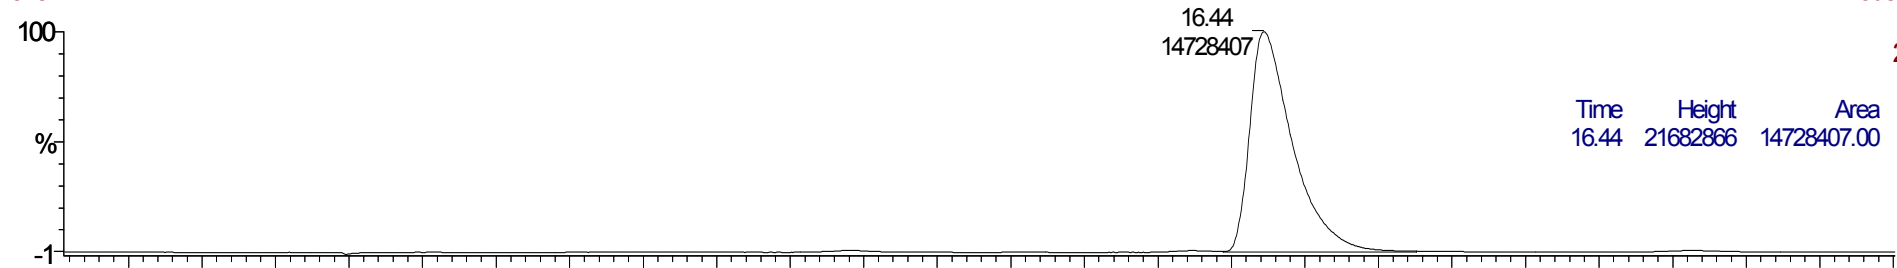

16.44  
14728407

| Time  | Height   | Area        | Area%  |
|-------|----------|-------------|--------|
| 16.44 | 21682866 | 14728407.00 | 100.00 |

2: Diode Array  
TIC  
2.16e7  
Area

Time

462

321-2 917 (15.395)

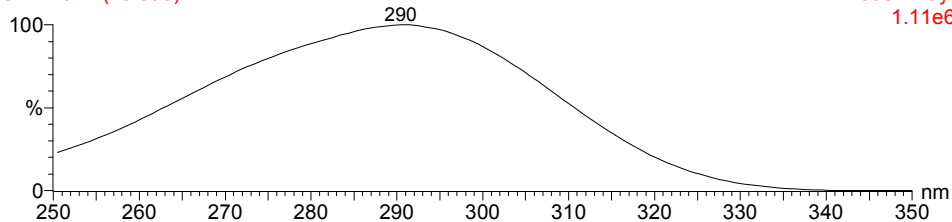

462

2: Diode Array 321-2 838 (15.398)

1.11e6

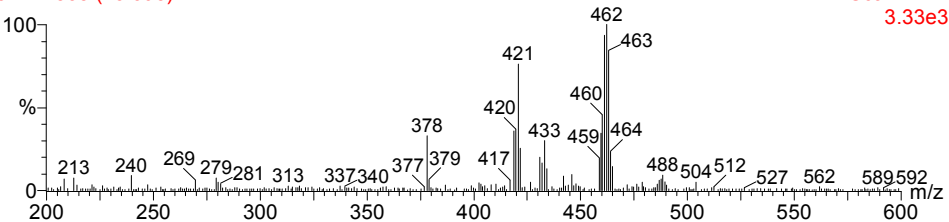

1: Scan AP+

3.33e3

444

322-2 1103 (18.495)

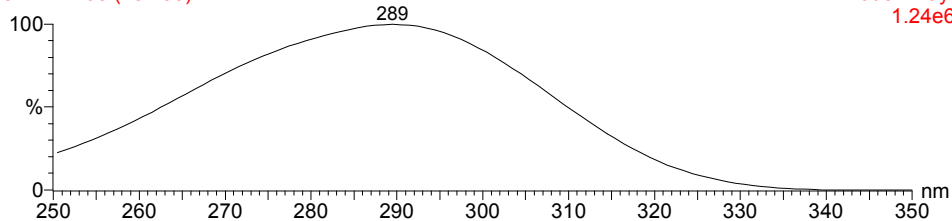

444

2: Diode Array 322-2 1012 (18.586)

1.24e6

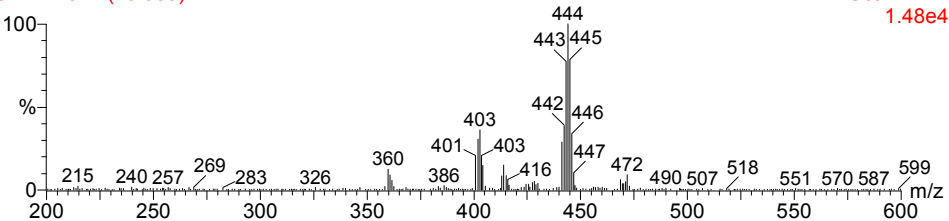

1: Scan AP+

1.48e4

462

323-2 1108 (18.578)

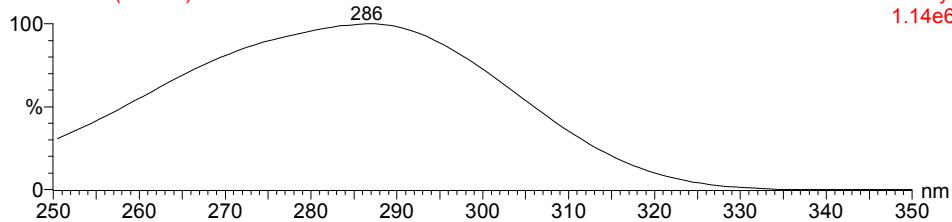

462

2: Diode Array 323-2 1015 (18.639)

1.14e6

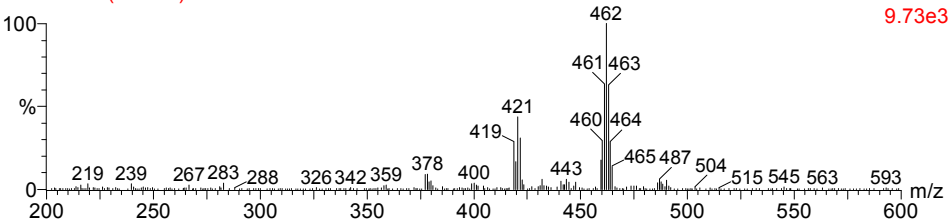

1: Scan AP+

9.73e3

480

327-2 674 (11.350)

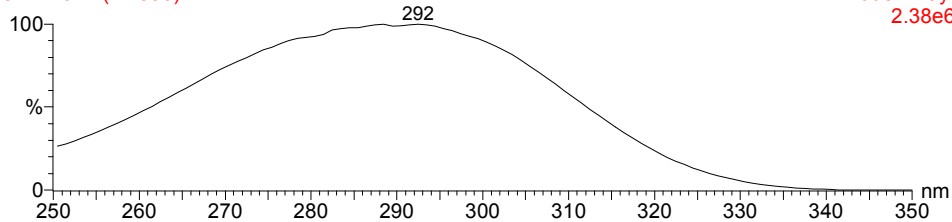

480

2: Diode Array 327-2 617 (11.343)

2.38e6

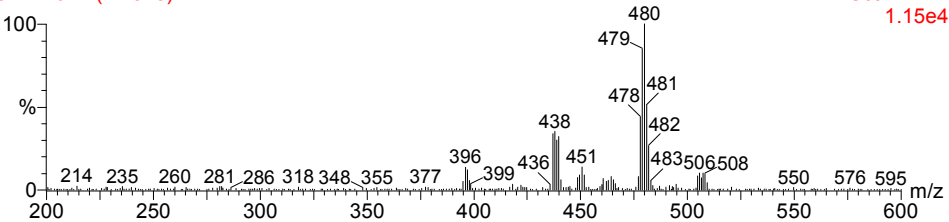

1: Scan AP+

1.15e4

480

328-2 1027 (17.232)

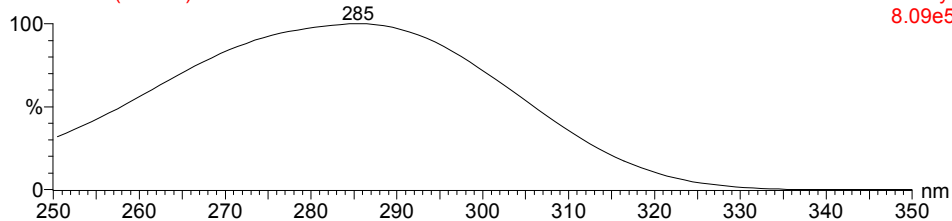

480

2: Diode Array 328-2 943 (17.317)

8.09e5

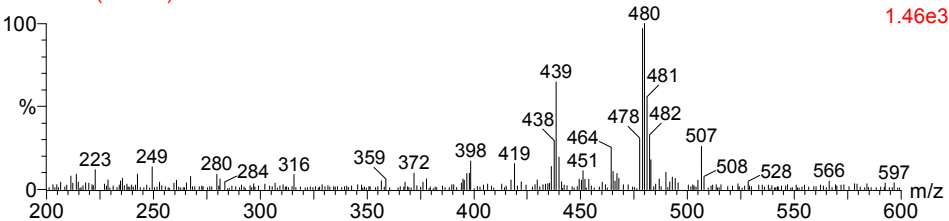

1: Scan AP+

1.46e3

321-99

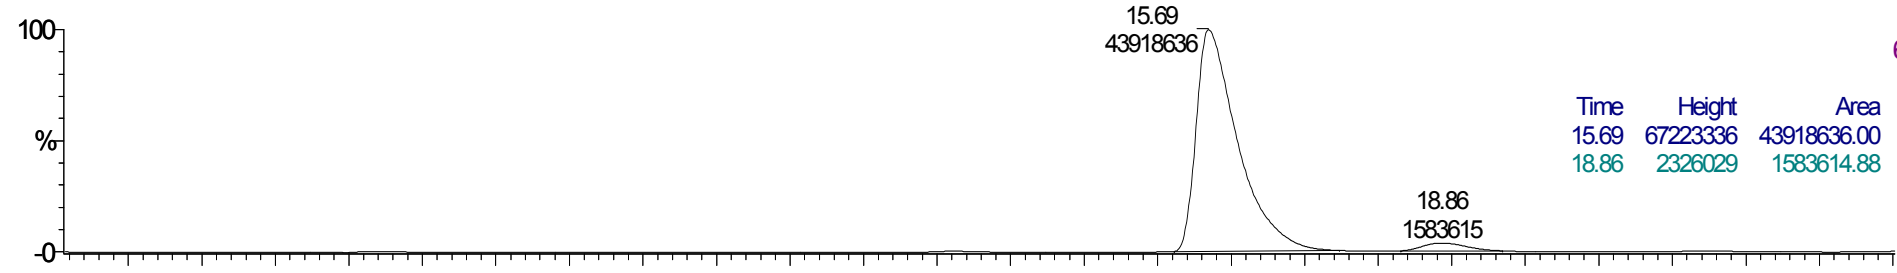

2: Diode Array  
TIC  
6.74e7  
Area

| Time  | Height   | Area        | Area% |
|-------|----------|-------------|-------|
| 15.69 | 67223336 | 43918636.00 | 96.52 |
| 18.86 | 2326029  | 1583614.88  | 3.48  |

322-2

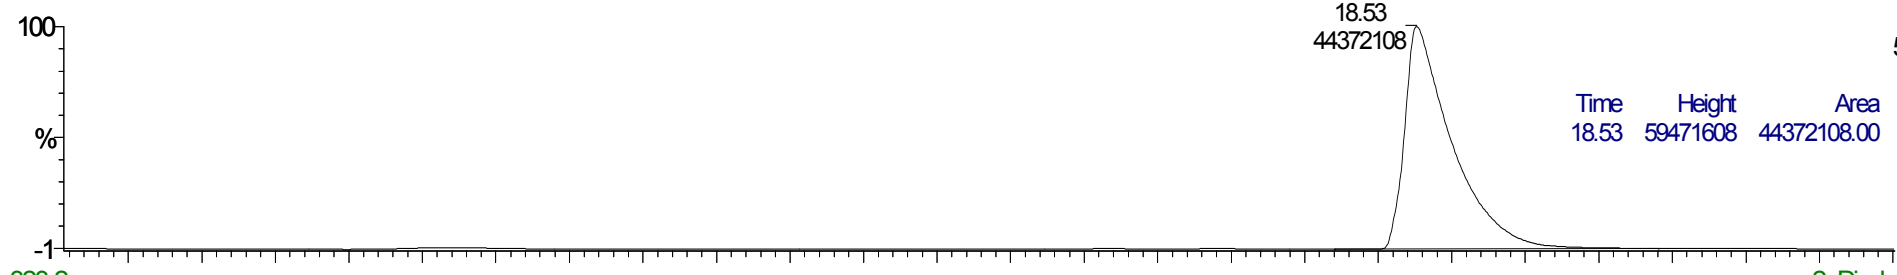

2: Diode Array  
TIC  
5.93e7  
Area

| Time  | Height   | Area        | Area%  |
|-------|----------|-------------|--------|
| 18.53 | 59471608 | 44372108.00 | 100.00 |

323-2

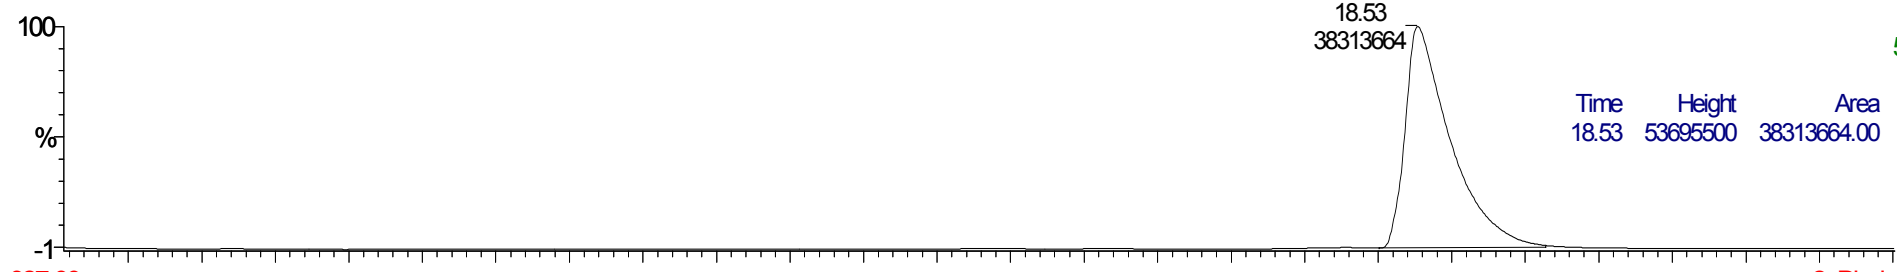

2: Diode Array  
TIC  
5.36e7  
Area

| Time  | Height   | Area        | Area%  |
|-------|----------|-------------|--------|
| 18.53 | 53695500 | 38313664.00 | 100.00 |

327-99

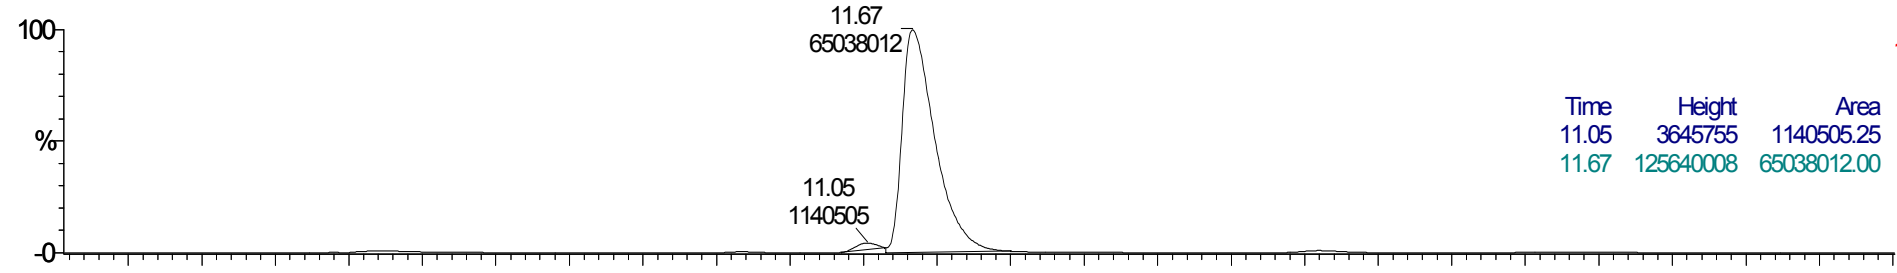

2: Diode Array  
TIC  
1.26e8  
Area

| Time  | Height    | Area        | Area% |
|-------|-----------|-------------|-------|
| 11.05 | 3645755   | 1140505.25  | 1.72  |
| 11.67 | 125640008 | 65038012.00 | 98.28 |

328-99

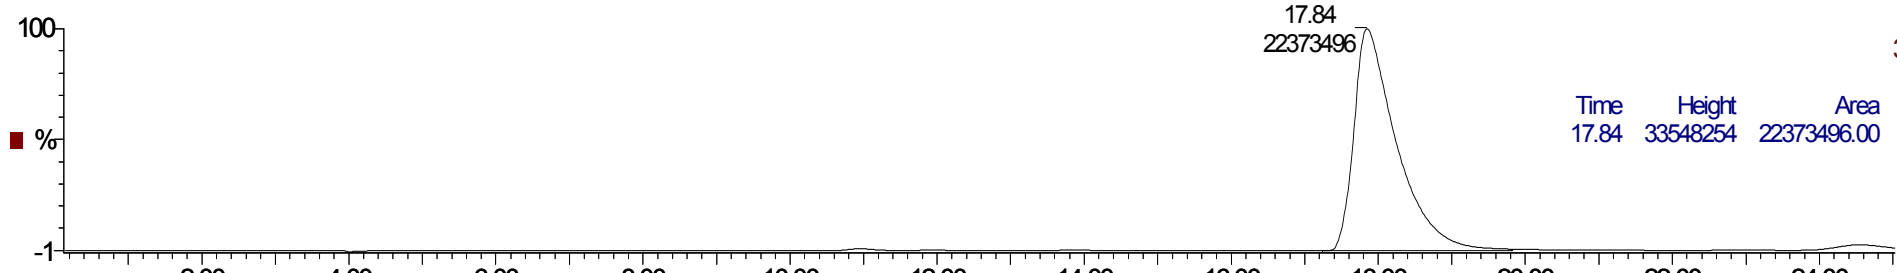

2: Diode Array  
TIC  
3.35e7  
Area

| Time  | Height   | Area        | Area%  |
|-------|----------|-------------|--------|
| 17.84 | 33548254 | 22373496.00 | 100.00 |

■ %

2.00 4.00 6.00 8.00 10.00 12.00 14.00 16.00 18.00 20.00 22.00 24.00 Time

426

2-3-7 583 (9.827)

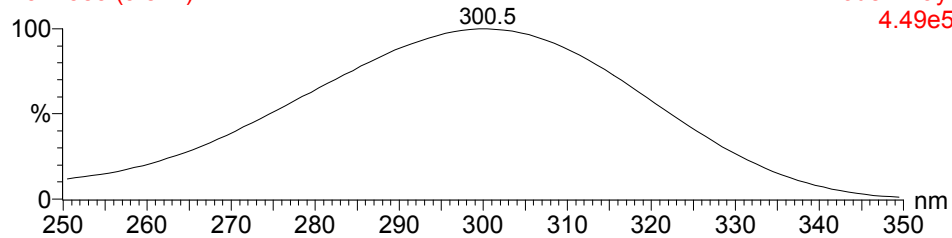

426

2: Diode Array 2-3-7 535 (9.834)

4.49e5

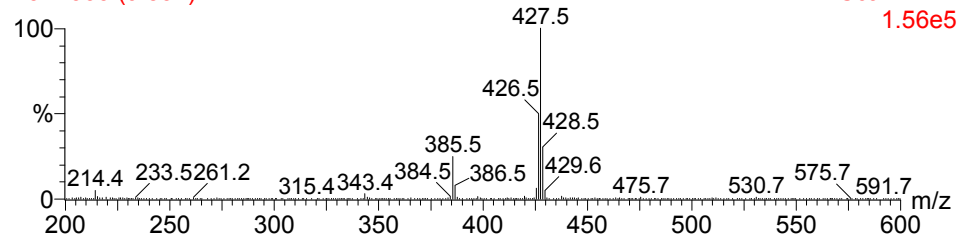

1: Scan AP+

1.56e5

426

3-3-1 729 (12.252)

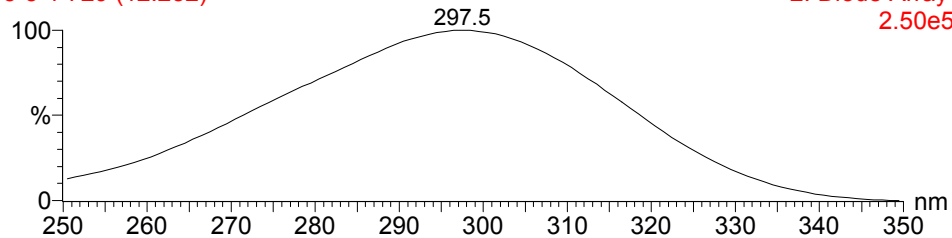

426

2: Diode Array 3-3-1 668 (12.272)

2.50e5

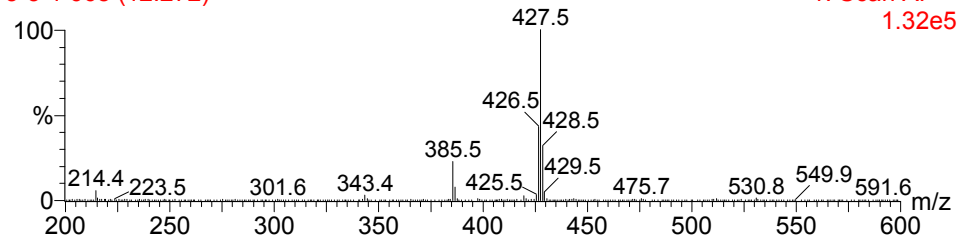

1: Scan AP+

1.32e5

426

3-3-3 846 (14.210)

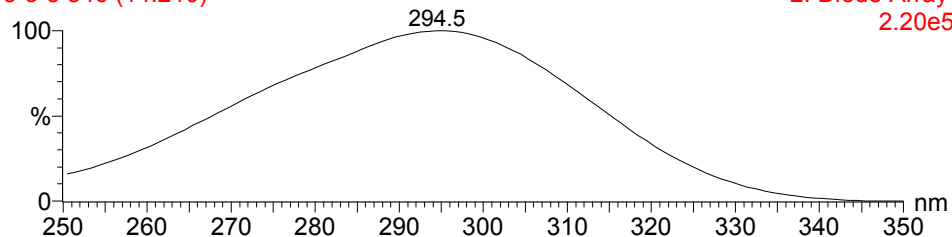

426

2: Diode Array 3-3-3 778 (14.289)

2.20e5

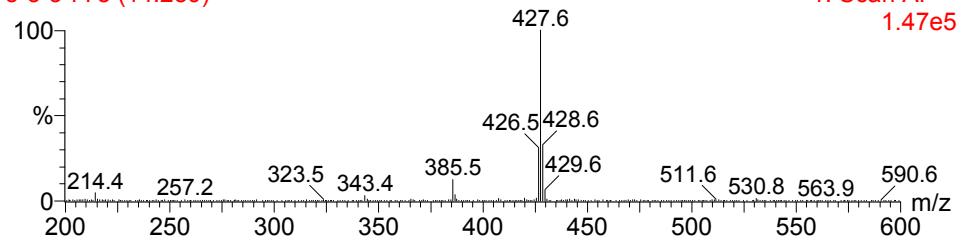

1: Scan AP+

1.47e5

444

3-3-8 738 (12.402)

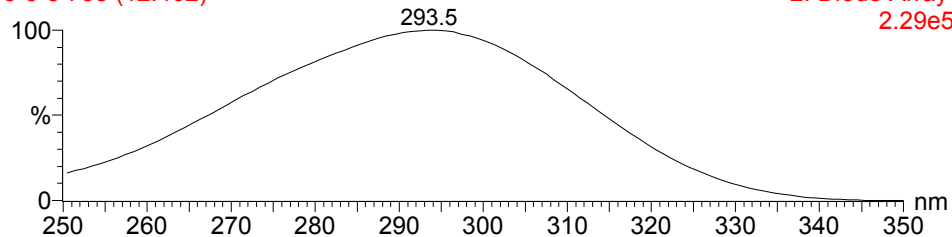

444

2: Diode Array 3-3-8 681 (12.511)

2.29e5

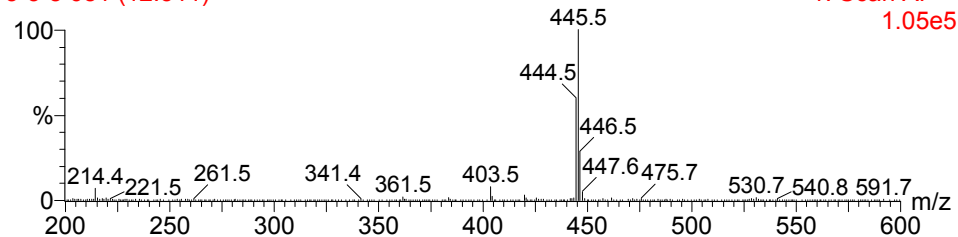

1: Scan AP+

1.05e5

444

7-3-3 489 (8.258)

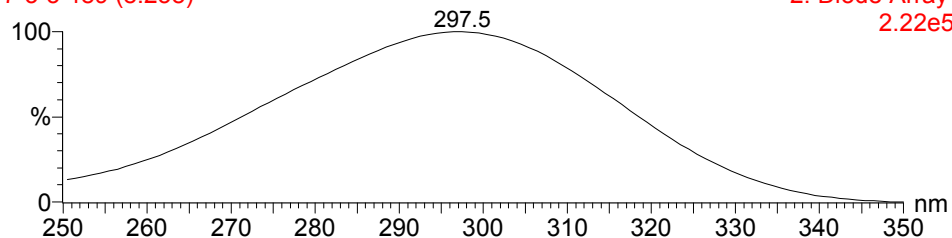

444

2: Diode Array 7-3-3 448 (8.239)

2.22e5

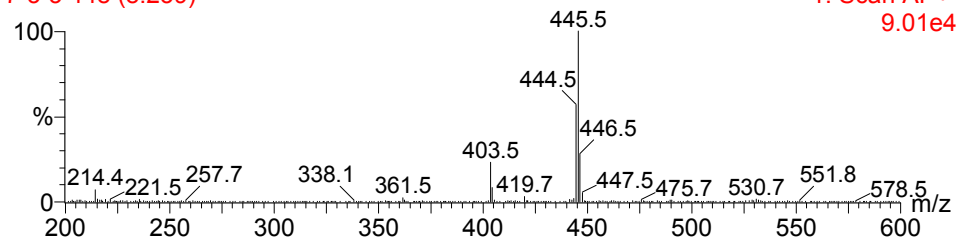

1: Scan AP+

9.01e4

2-3-7

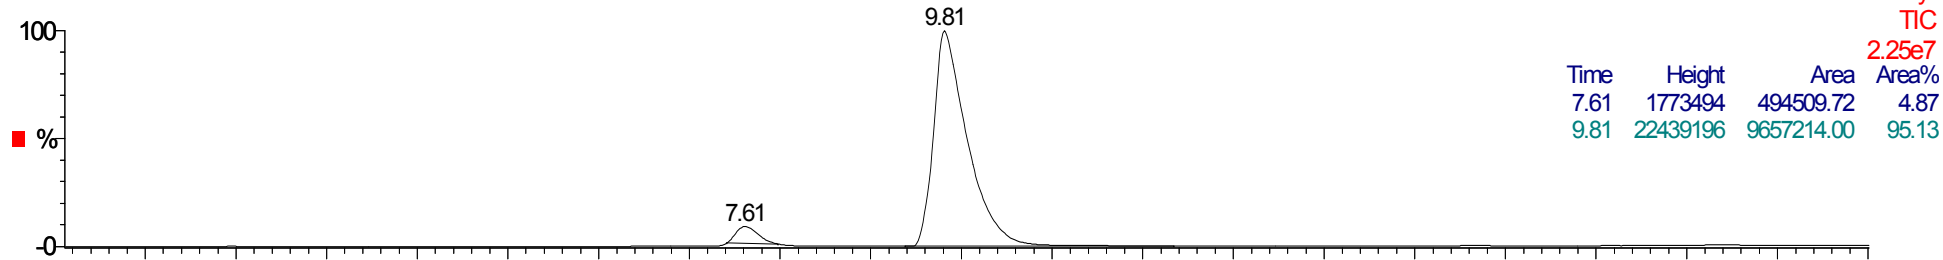

3-3-1

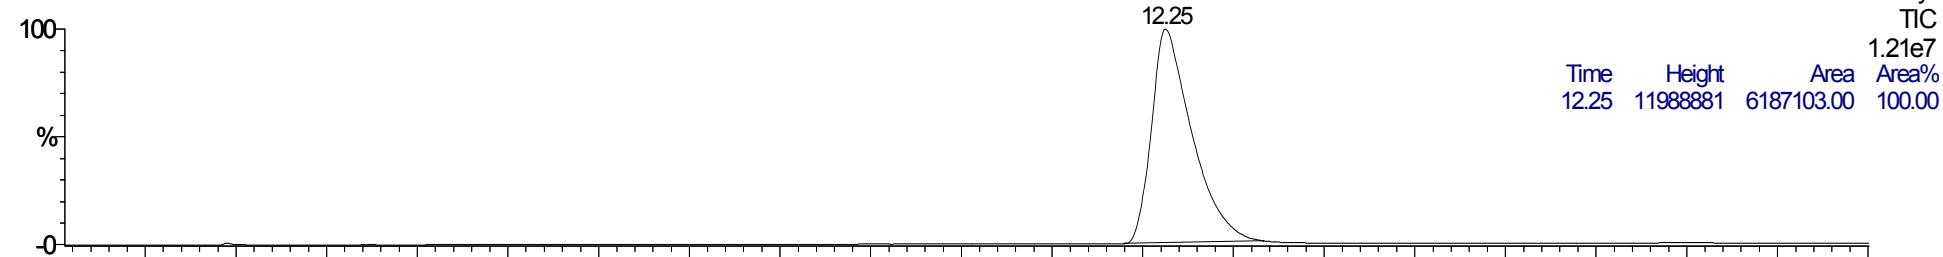

3-3-3

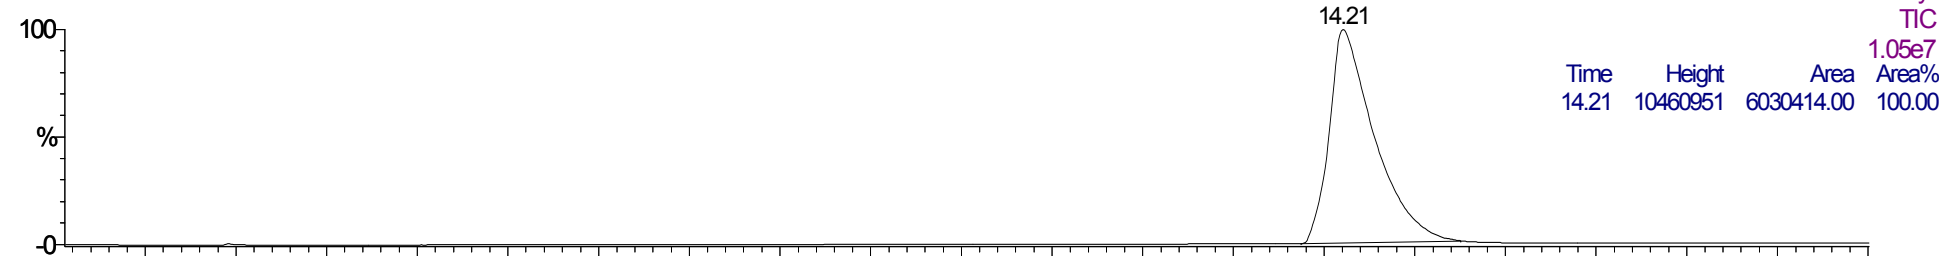

3-3-8

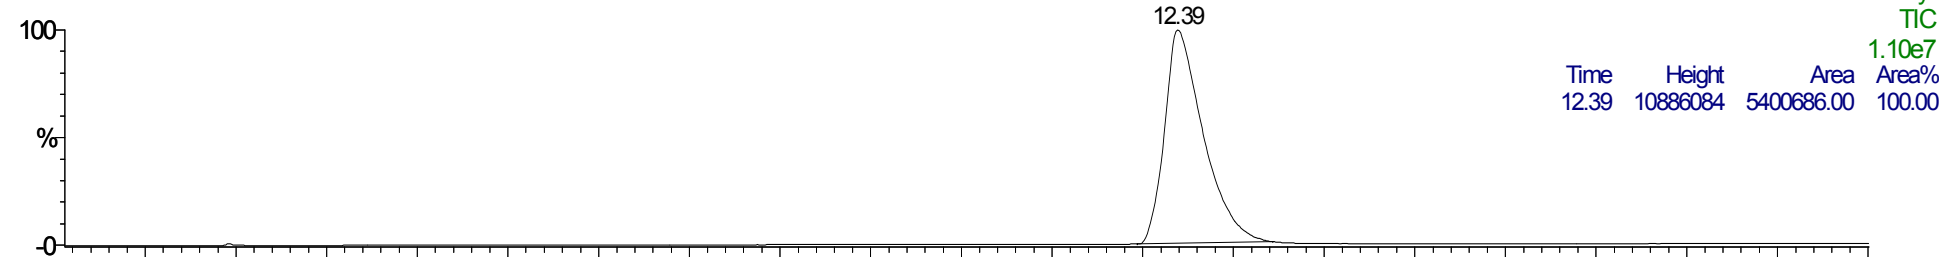

7-3-3

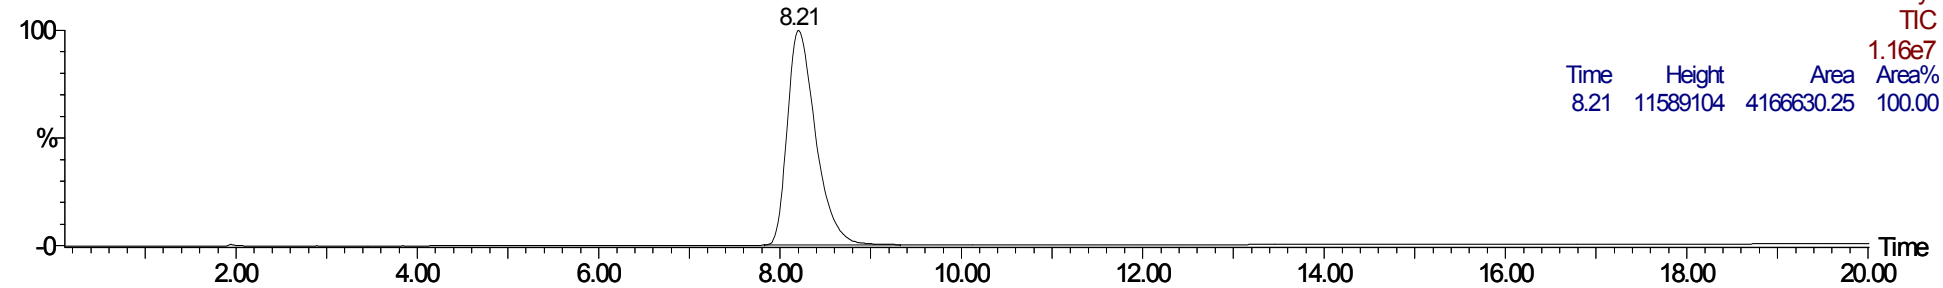

444

3-5-1 532 (8.967)

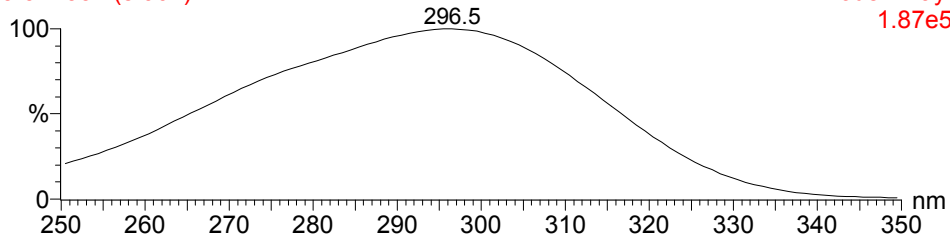

2: Diode Array 1.87e5

444

3-5-1 489 (8.991)

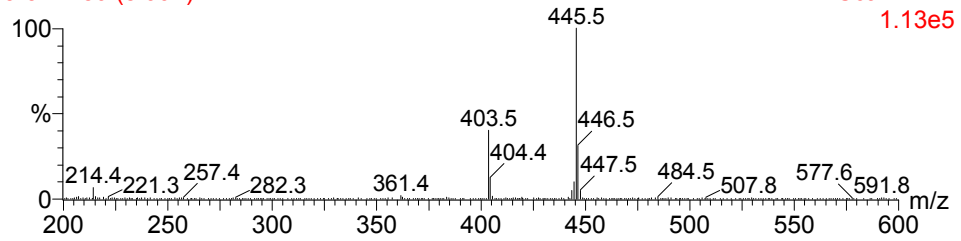

1: Scan AP+ 1.13e5

426

3-5-2 709 (11.917)

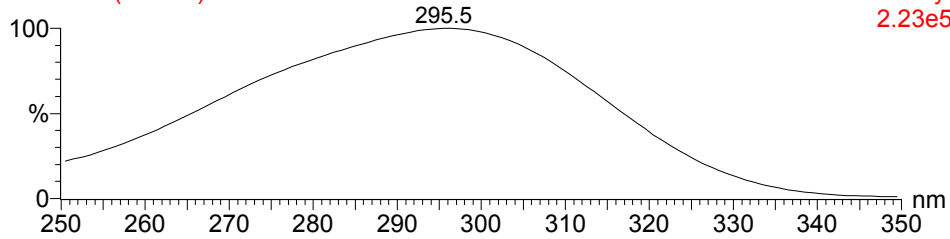

2: Diode Array 2.23e5

426

3-5-2 652 (11.979)

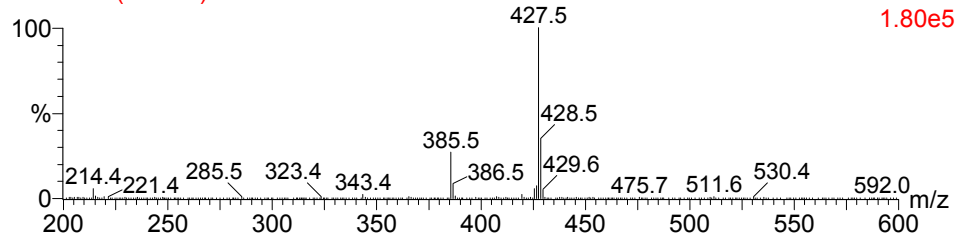

1: Scan AP+ 1.80e5

444

3-5-3 618 (10.413)

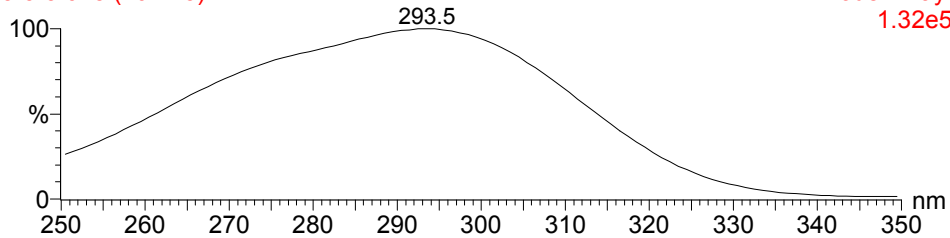

2: Diode Array 1.32e5

444

3-5-3 570 (10.476)

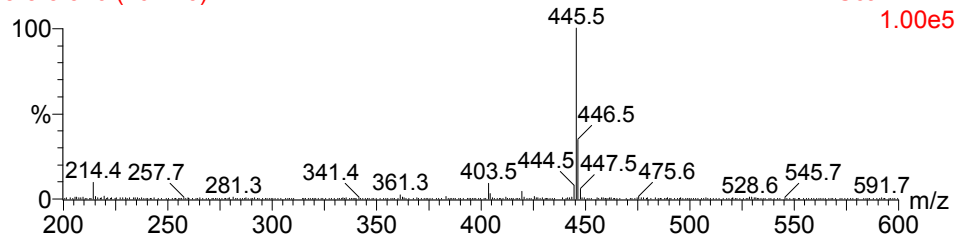

1: Scan AP+ 1.00e5

462

3-5-7 362 (6.145)

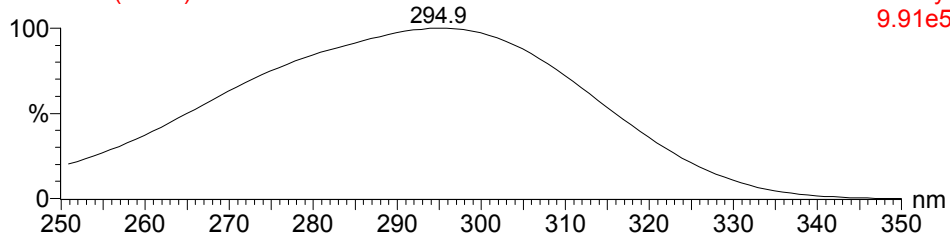

2: Diode Array 9.91e5

462

3-5-7 335 (6.167)

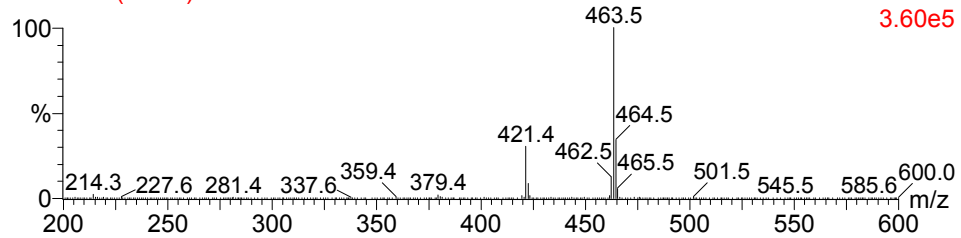

1: Scan AP+ 3.60e5

462

3-5-8 539 (9.085)

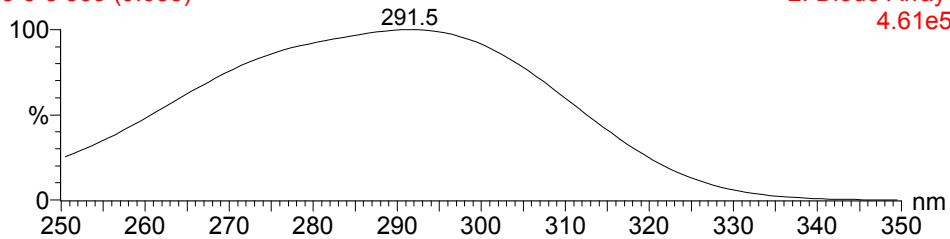

2: Diode Array 4.61e5

462

3-5-8 492 (9.046)

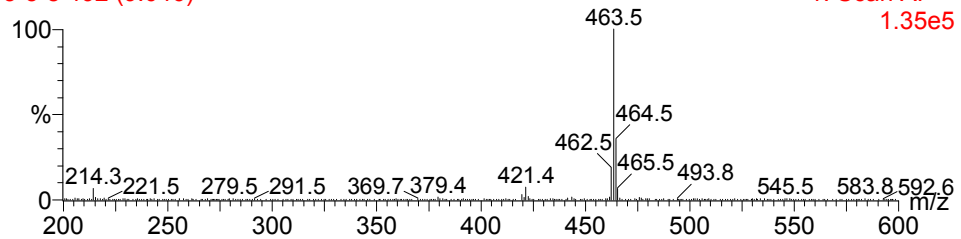

1: Scan AP+ 1.35e5

3-5-1

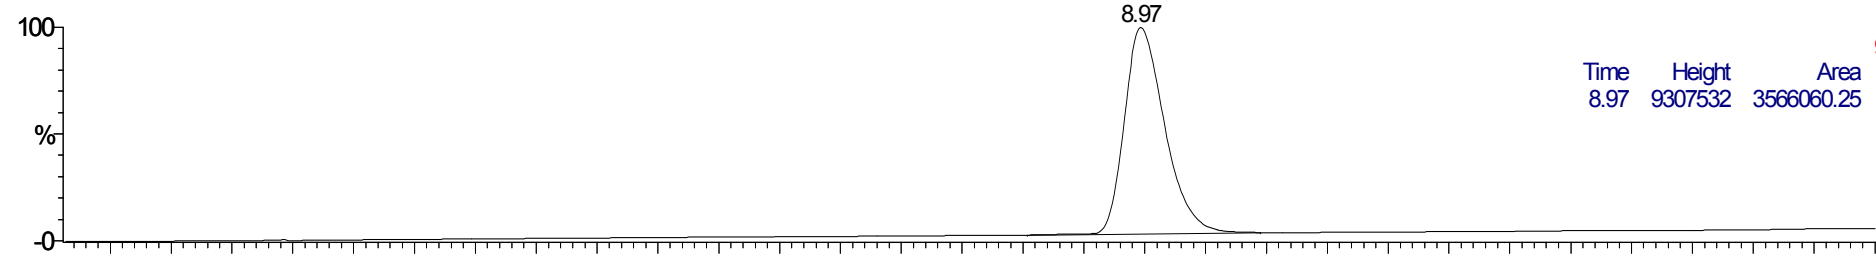

2: Diode Array  
TIC  
9.62e6

| Time | Height  | Area       | Area%  |
|------|---------|------------|--------|
| 8.97 | 9307532 | 3566060.25 | 100.00 |

3-5-2

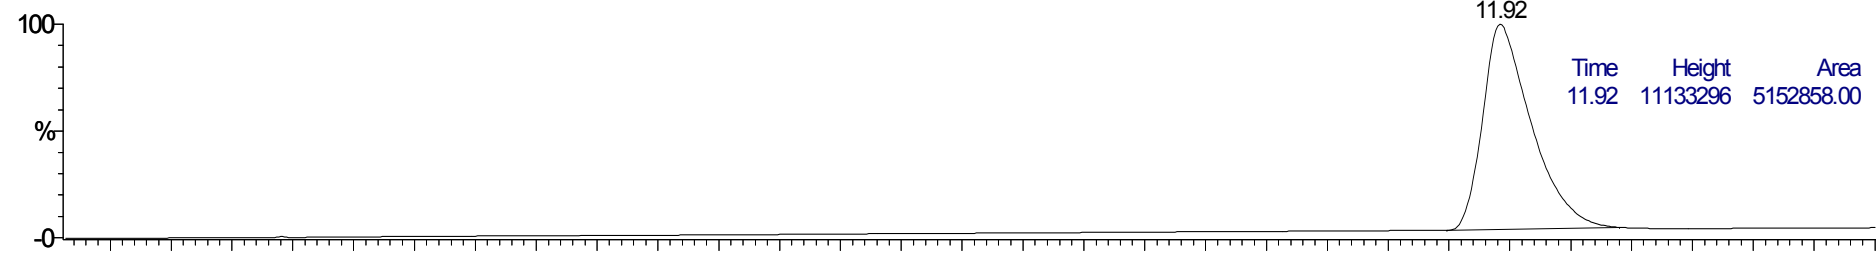

2: Diode Array  
TIC  
1.16e7

| Time  | Height   | Area       | Area%  |
|-------|----------|------------|--------|
| 11.92 | 11133296 | 5152858.00 | 100.00 |

3-5-3

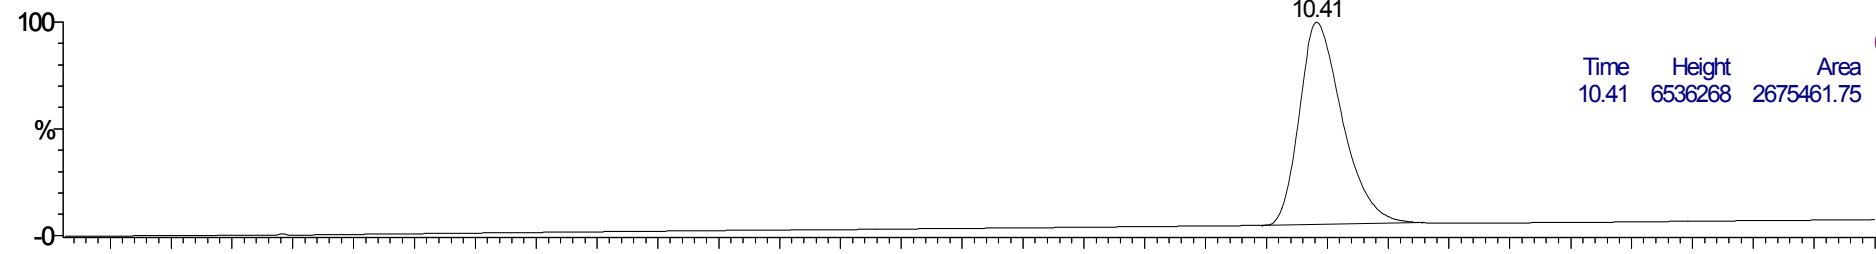

2: Diode Array  
TIC  
6.89e6

| Time  | Height  | Area       | Area%  |
|-------|---------|------------|--------|
| 10.41 | 6536268 | 2675461.75 | 100.00 |

3-5-7

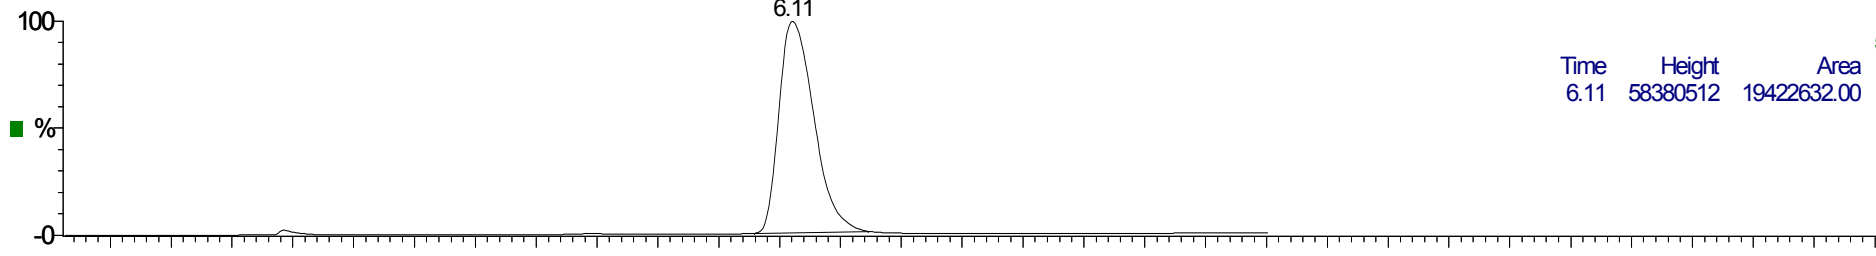

2: Diode Array  
TIC  
5.91e7

| Time | Height   | Area        | Area%  |
|------|----------|-------------|--------|
| 6.11 | 58380512 | 19422632.00 | 100.00 |

3-5-8

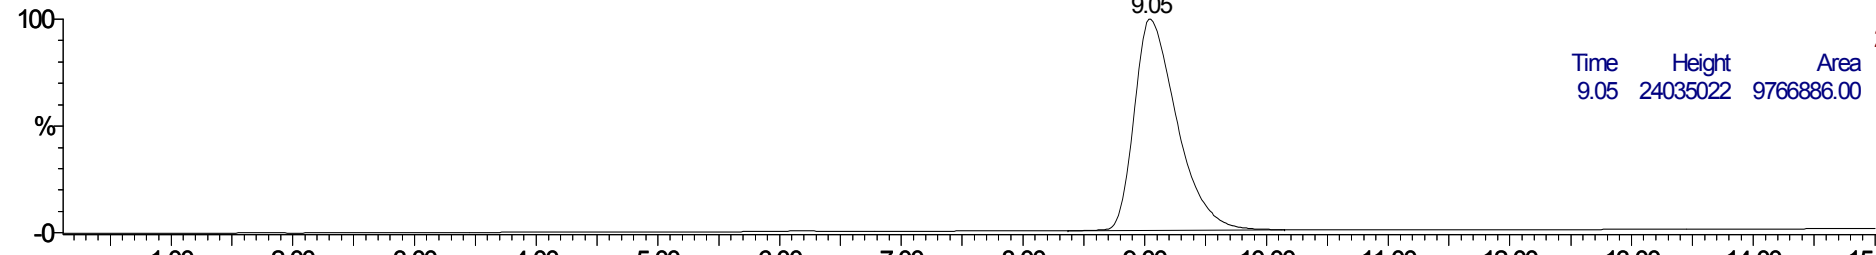

2: Diode Array  
TIC  
2.43e7

| Time | Height   | Area       | Area%  |
|------|----------|------------|--------|
| 9.05 | 24035022 | 9766886.00 | 100.00 |

Time



462

3-6-1 423 (7.163)

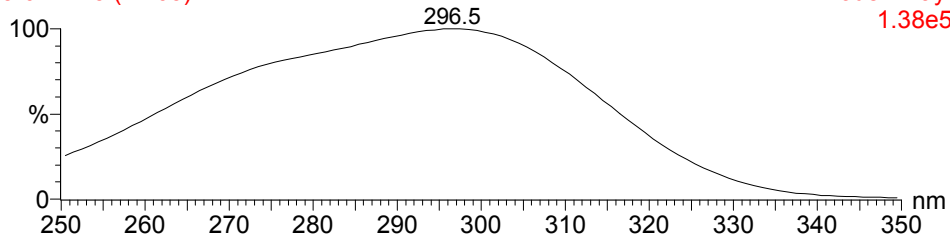

462

2: Diode Array 3-6-1 387 (7.120)

1.38e5

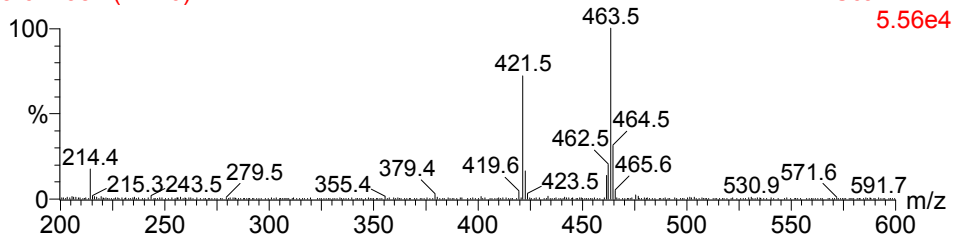

1: Scan AP+

5.56e4

444

3-6-2 542 (9.145)

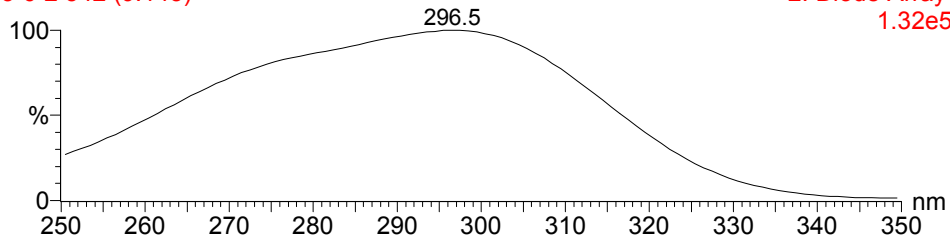

444

2: Diode Array 3-6-2 499 (9.174)

1.32e5

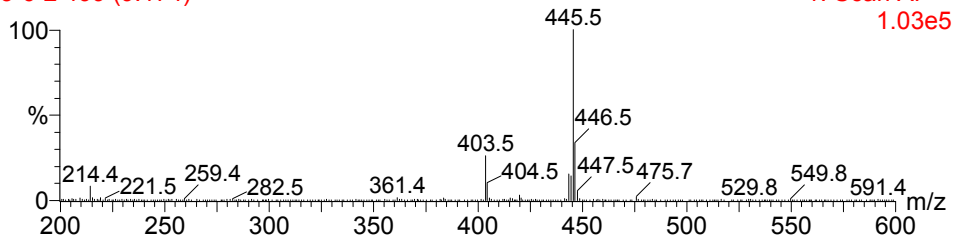

1: Scan AP+

1.03e5

462

3-6-3 561 (9.462)

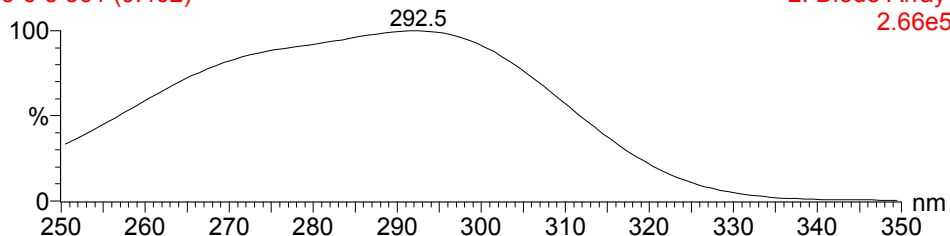

462

2: Diode Array 3-6-3 518 (9.522)

2.66e5

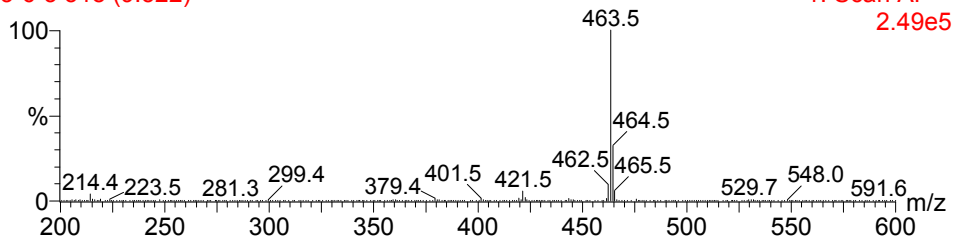

1: Scan AP+

2.49e5

480

3-6-7 301 (5.128)

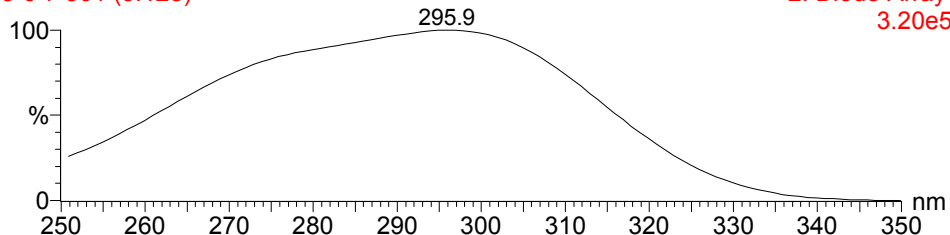

480

2: Diode Array 3-6-7 281 (5.177)

3.20e5

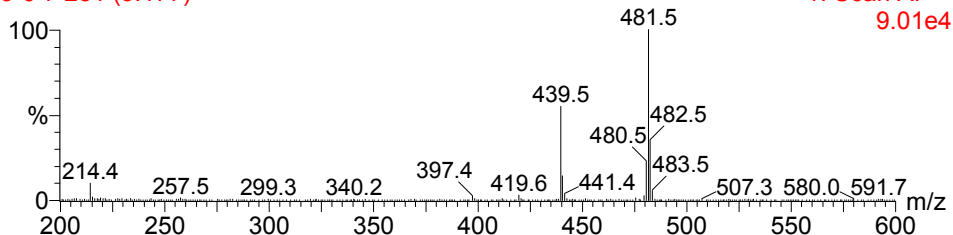

1: Scan AP+

9.01e4

480

3-6-8 492 (8.315)

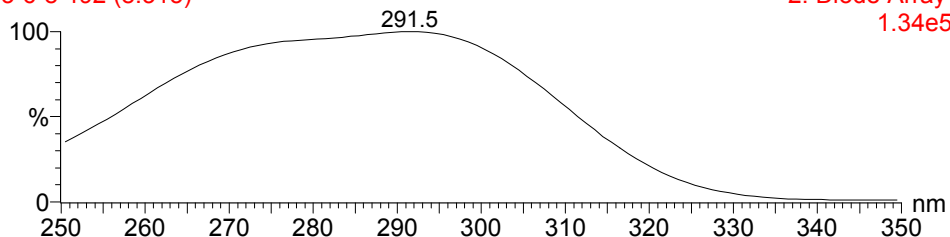

480

2: Diode Array 3-6-8 453 (8.330)

1.34e5

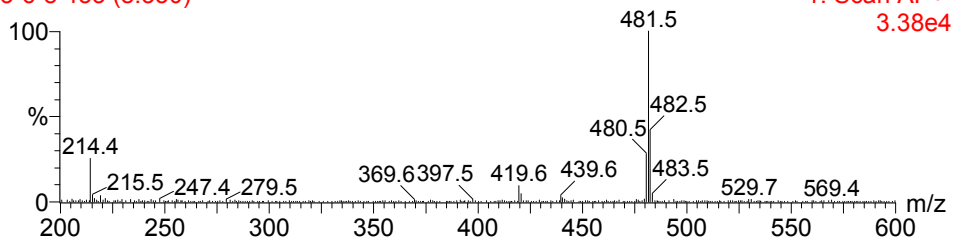

1: Scan AP+

3.38e4

3-6-1

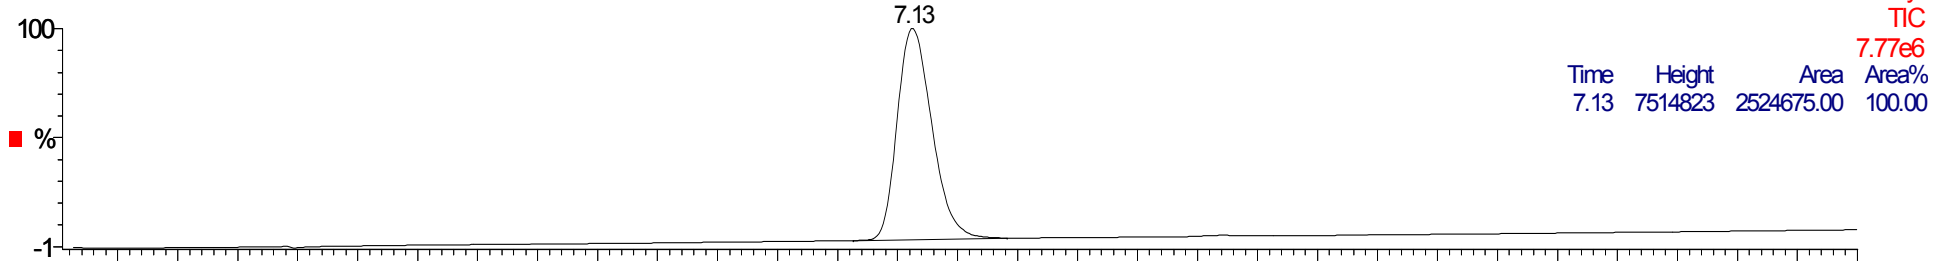

3-6-2

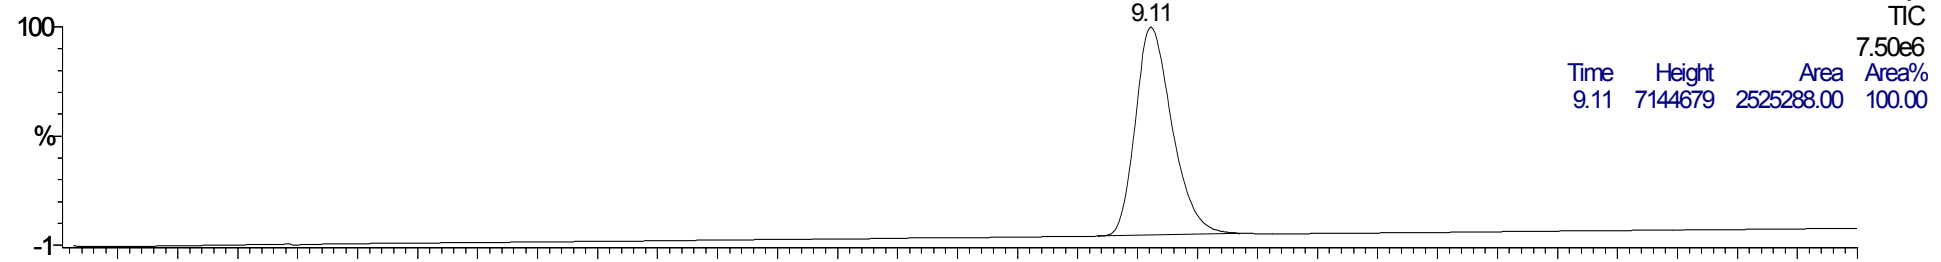

3-6-3

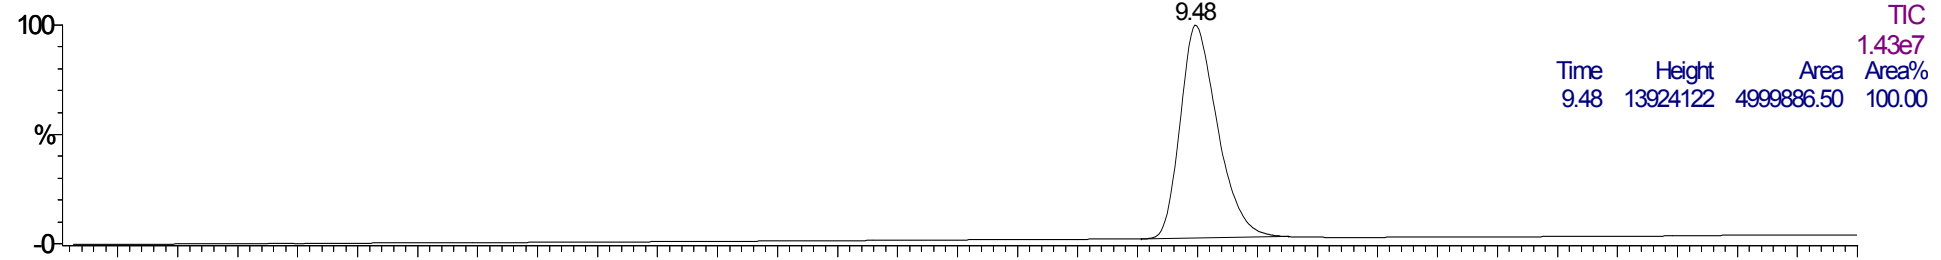

3-6-7

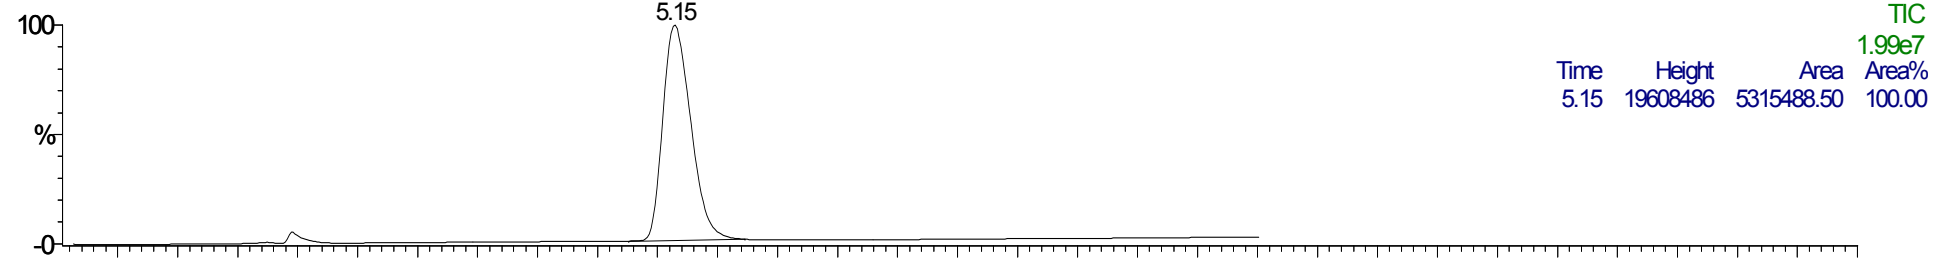

3-6-8

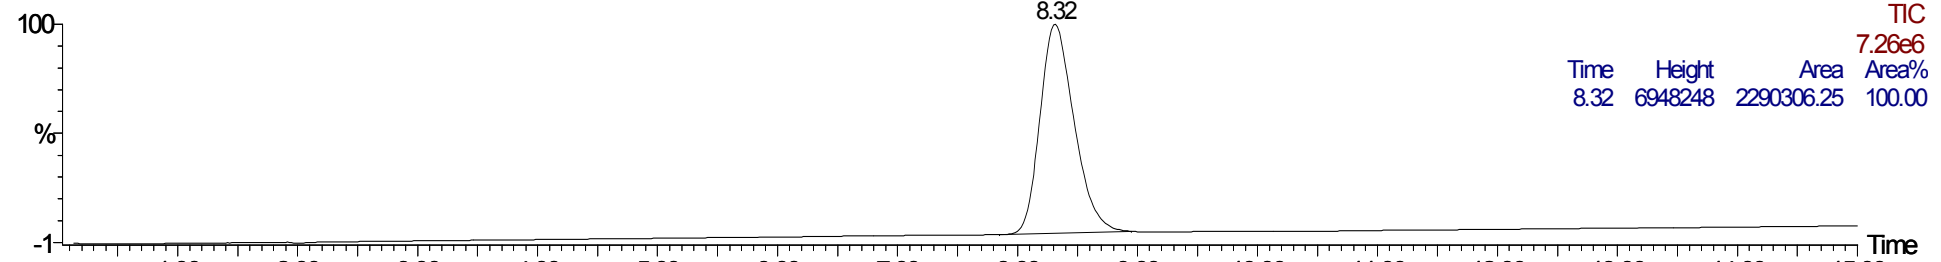

1.00 2.00 3.00 4.00 5.00 6.00 7.00 8.00 9.00 10.00 11.00 12.00 13.00 14.00 15.00 Time

444

3-7-1 532 (8.977)

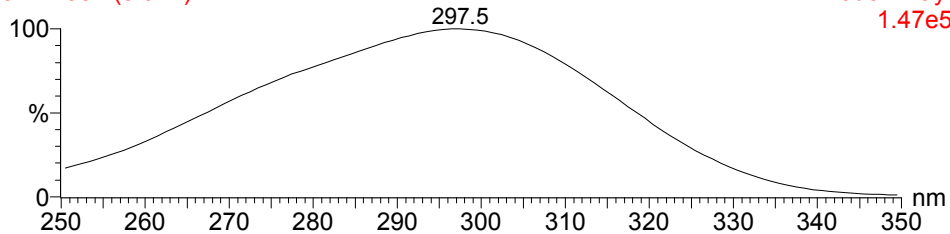

444

2: Diode Array 3-7-1 490 (9.009)

1.47e5

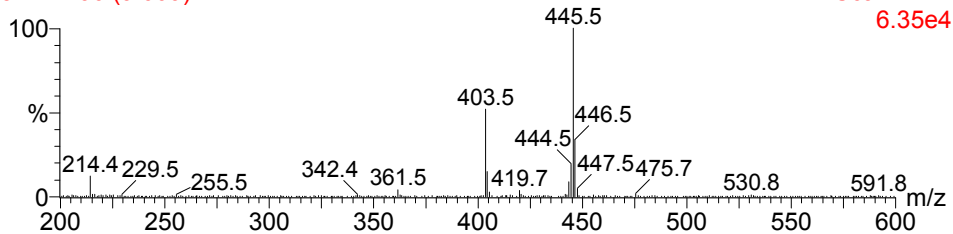

1: Scan AP+

6.35e4

426

3-7-2 692 (11.642)

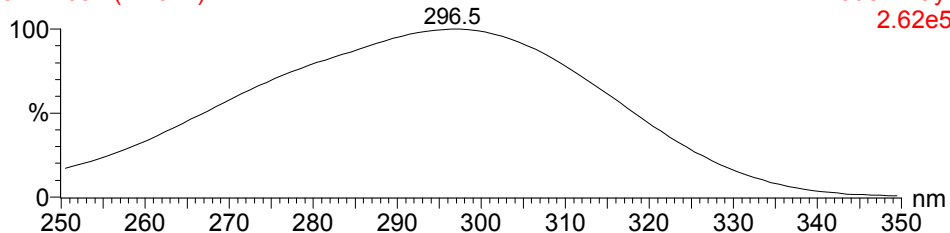

426

2: Diode Array 3-7-2 635 (11.667)

2.62e5

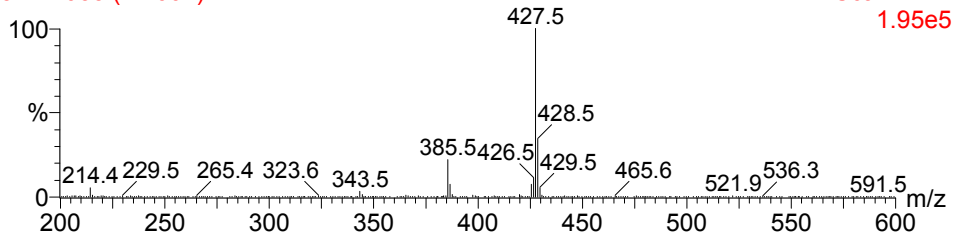

1: Scan AP+

1.95e5

444

3-7-3 719 (12.092)

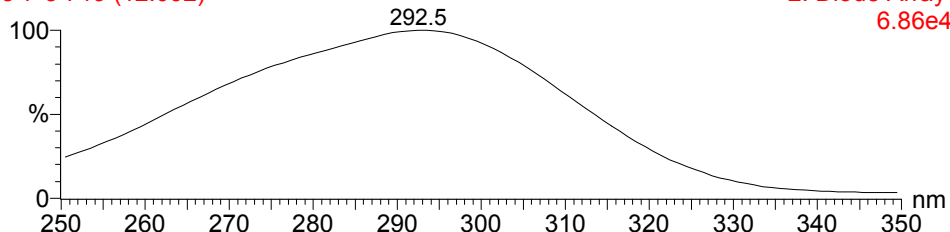

444

2: Diode Array 3-7-3 661 (12.144)

6.86e4

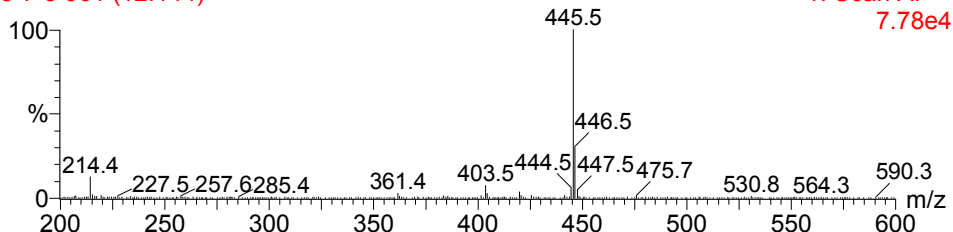

1: Scan AP+

7.78e4

462

3-7-7 374 (6.335)

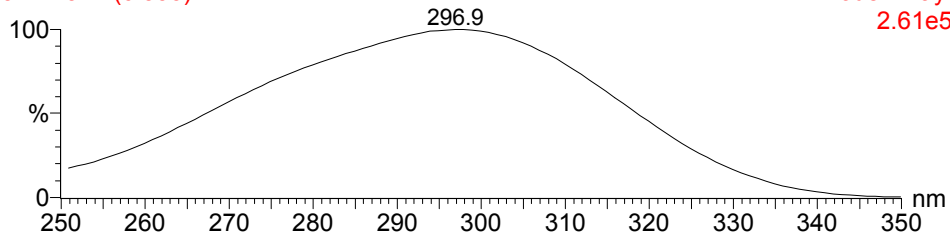

462

2: Diode Array 3-7-7 349 (6.424)

2.61e5

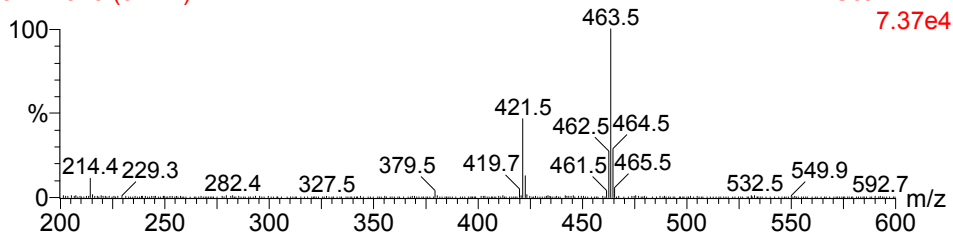

1: Scan AP+

7.37e4

462

3-7-8 625 (10.527)

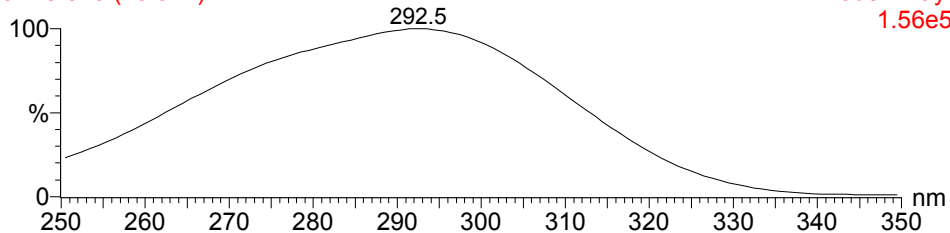

462

2: Diode Array 3-7-8 576 (10.586)

1.56e5

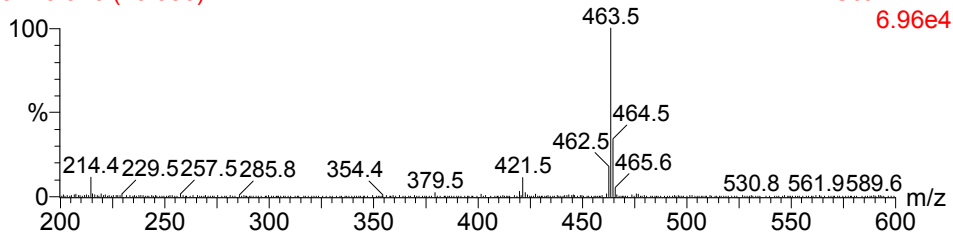

1: Scan AP+

6.96e4

3-7-1

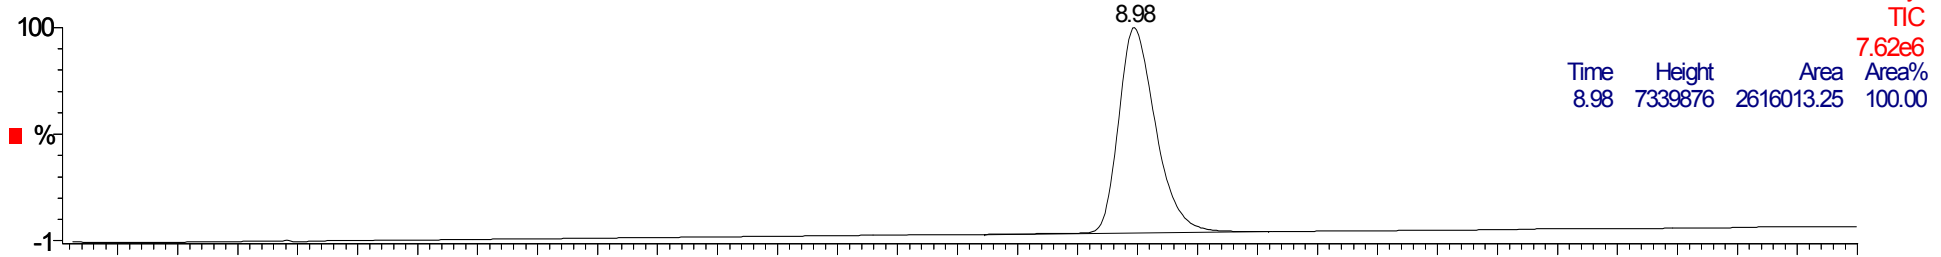

3-7-2

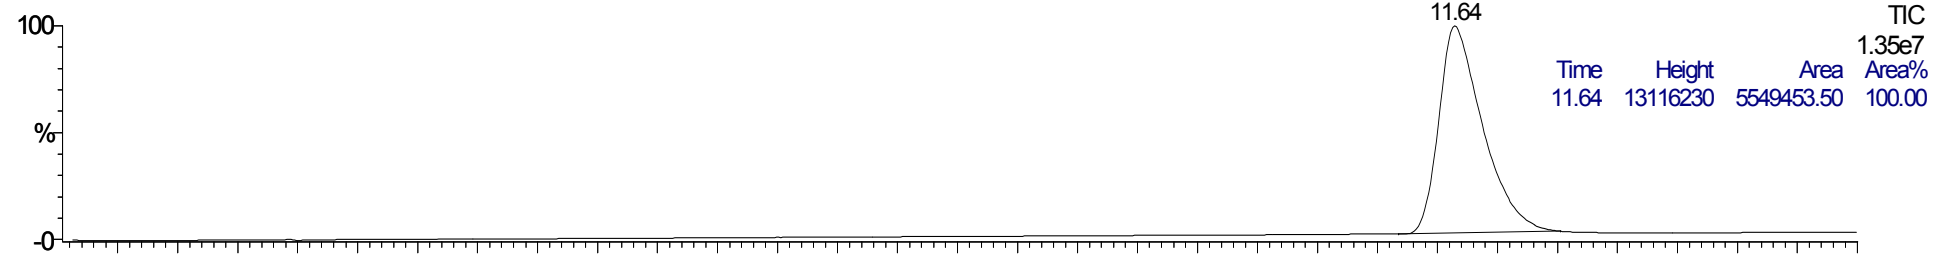

3-7-3

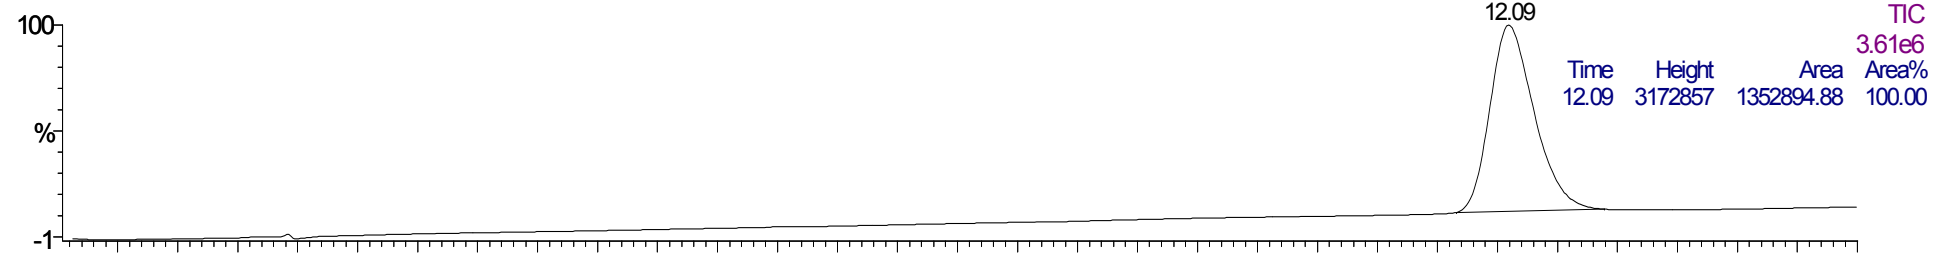

3-7-7

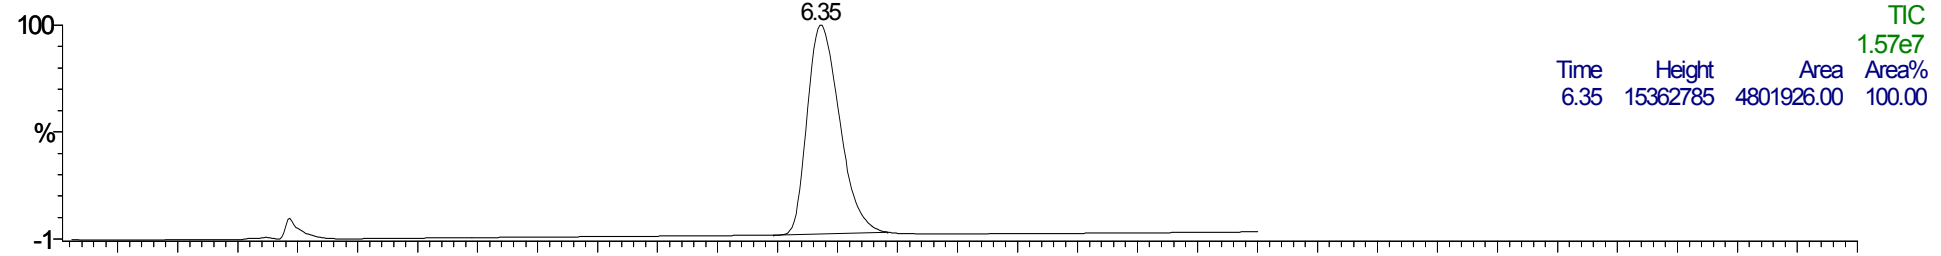

3-7-8

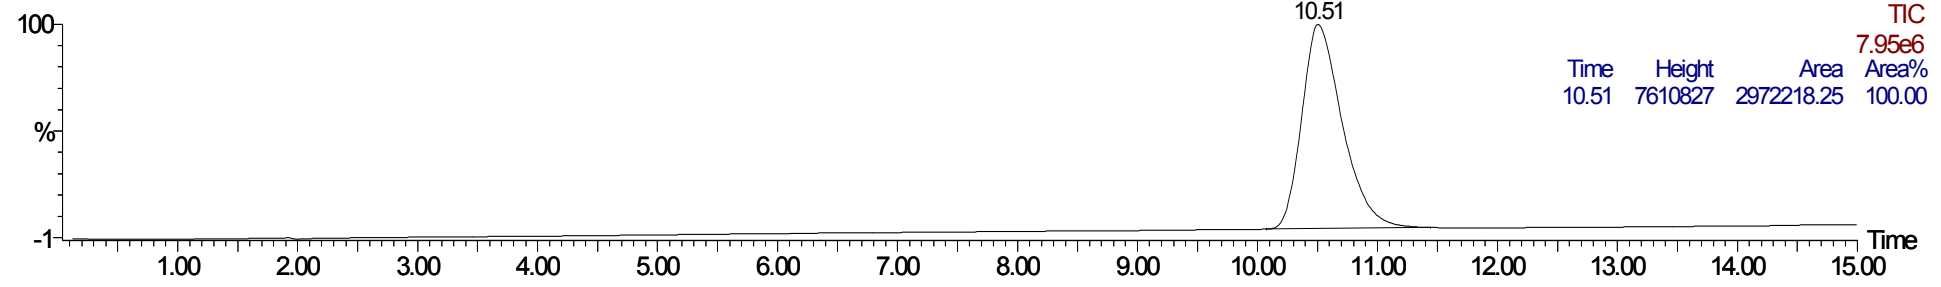

480

3-8-1 498 (8.413)

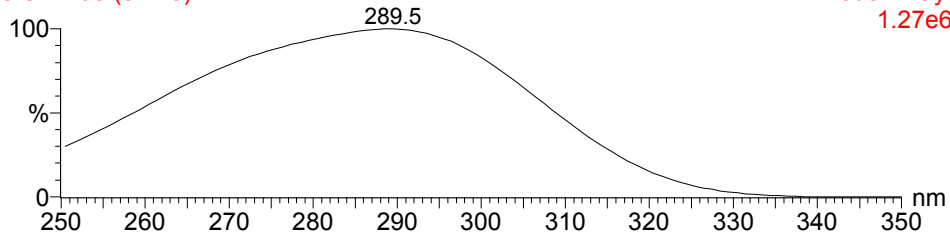

480

2: Diode Array 3-8-1 460 (8.459)

1.27e6

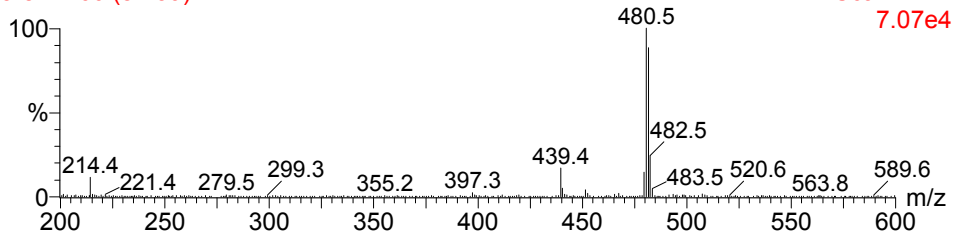

1: Scan AP+

7.07e4

462

3-8-2 600 (10.115)

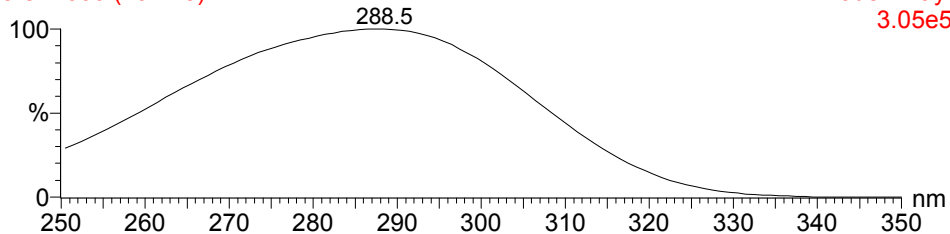

462

2: Diode Array 3-8-2 554 (10.182)

3.05e5

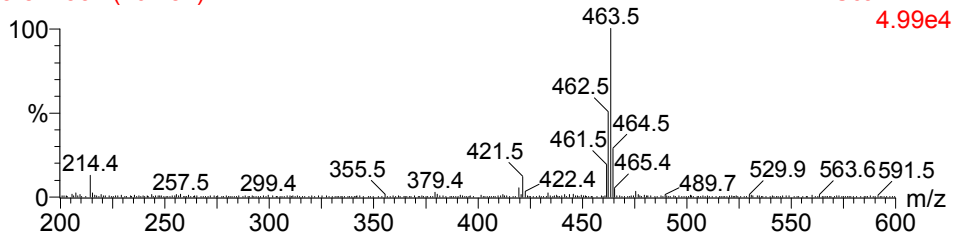

1: Scan AP+

4.99e4

480

3-8-3 598 (10.082)

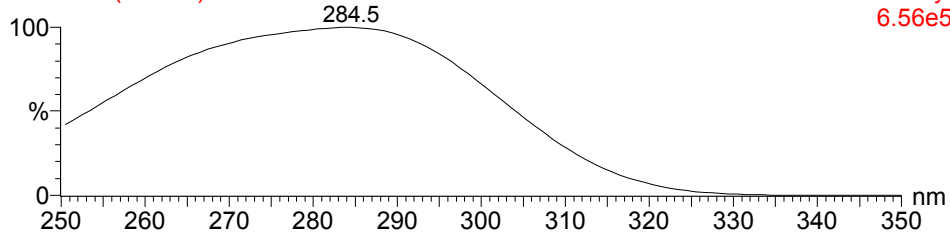

480

2: Diode Array 3-8-3 551 (10.127)

6.56e5

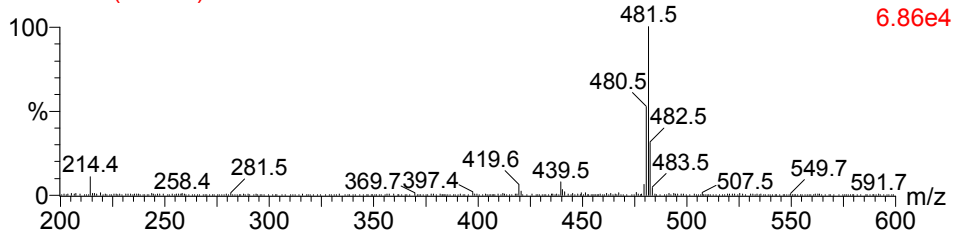

1: Scan AP+

6.86e4

498

3-8-7 382 (6.482)

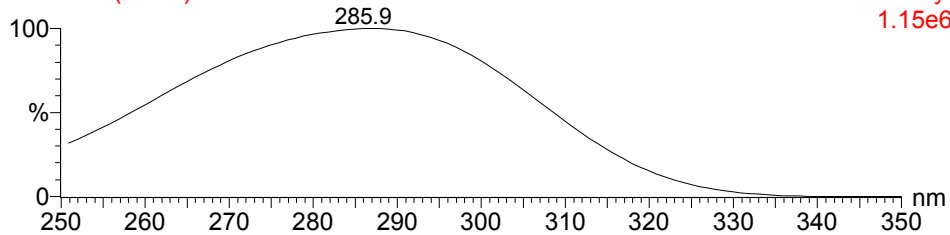

498

2: Diode Array 3-8-7 352 (6.479)

1.15e6

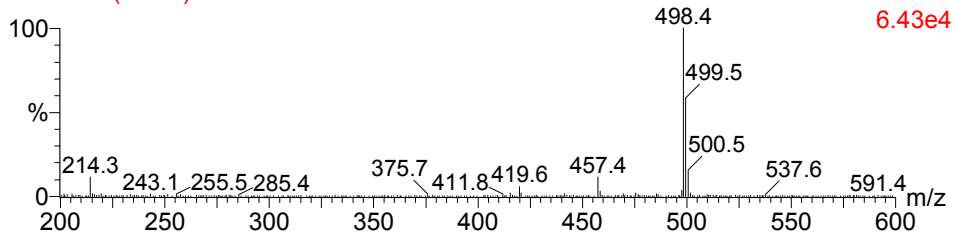

1: Scan AP+

6.43e4

498

3-8-8 578 (9.737)

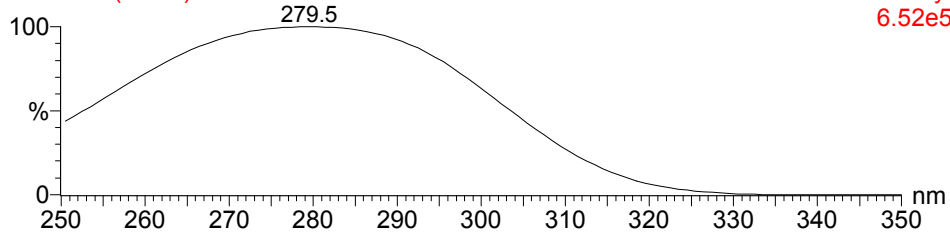

498

2: Diode Array 3-8-8 527 (9.687)

6.52e5

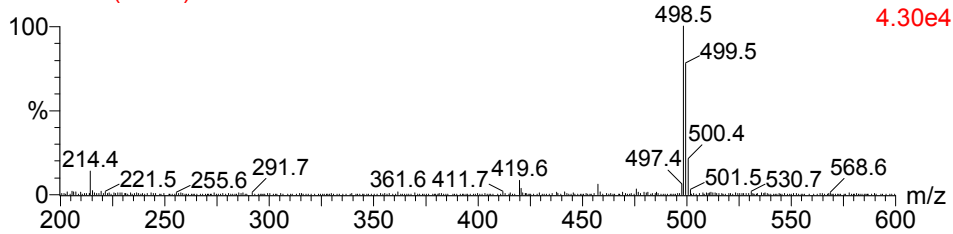

1: Scan AP+

4.30e4

3-8-1

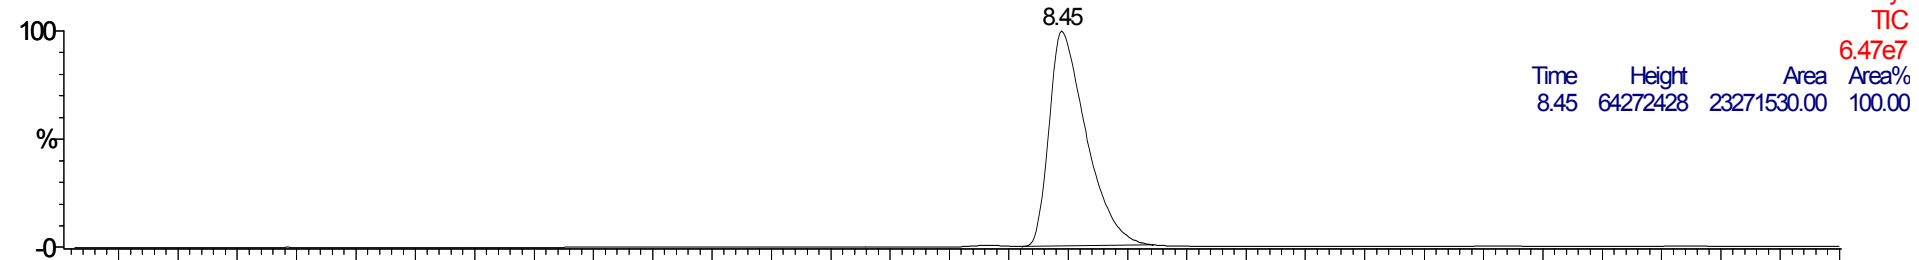

3-8-2

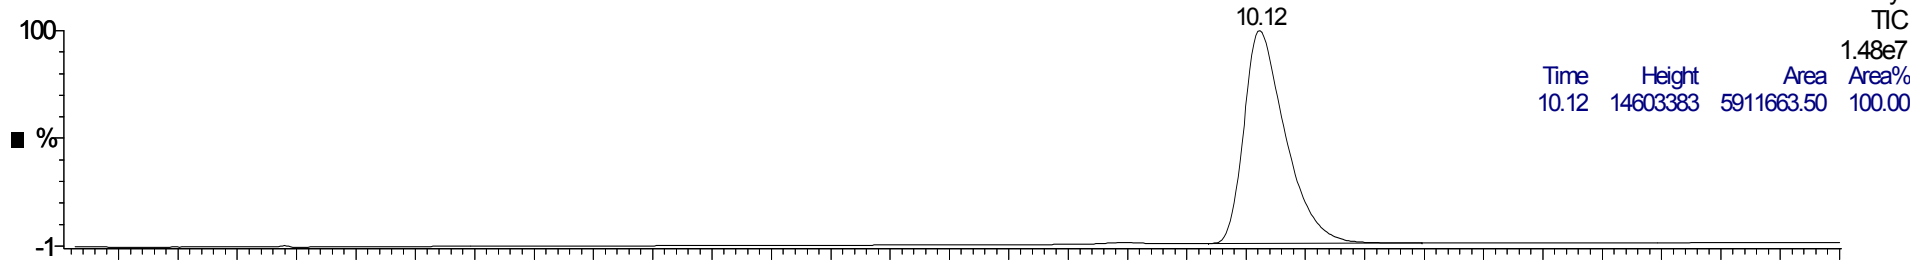

3-8-3

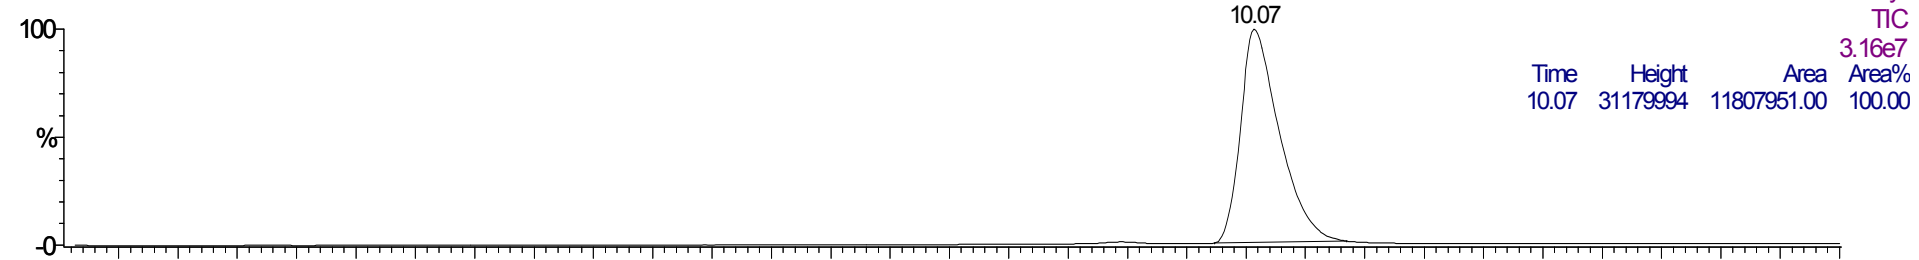

3-8-7

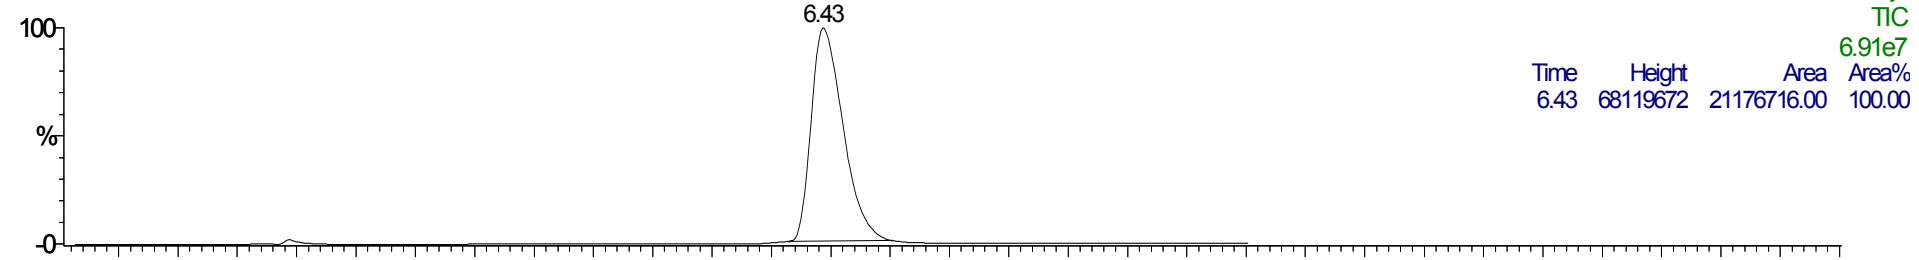

3-8-8

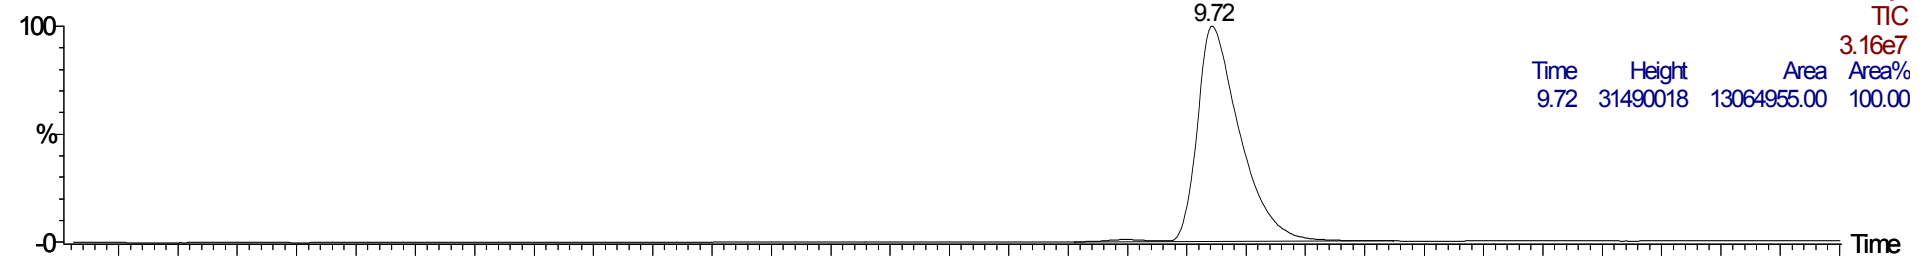

2: Diode Array  
TIC  
6.47e7

| Time | Height   | Area        | Area%  |
|------|----------|-------------|--------|
| 8.45 | 64272428 | 23271530.00 | 100.00 |

2: Diode Array  
TIC  
1.48e7

| Time  | Height   | Area       | Area%  |
|-------|----------|------------|--------|
| 10.12 | 14603383 | 5911663.50 | 100.00 |

2: Diode Array  
TIC  
3.16e7

| Time  | Height   | Area        | Area%  |
|-------|----------|-------------|--------|
| 10.07 | 31179994 | 11807951.00 | 100.00 |

2: Diode Array  
TIC  
6.91e7

| Time | Height   | Area        | Area%  |
|------|----------|-------------|--------|
| 6.43 | 68119672 | 21176716.00 | 100.00 |

2: Diode Array  
TIC  
3.16e7

| Time | Height   | Area        | Area%  |
|------|----------|-------------|--------|
| 9.72 | 31490018 | 13064955.00 | 100.00 |

Time

498

711-99 588 (9.922)

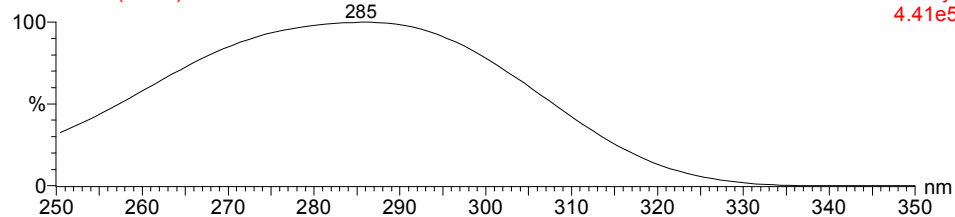

498

2: Diode Array 711-99 542 (9.971)

4.41e5

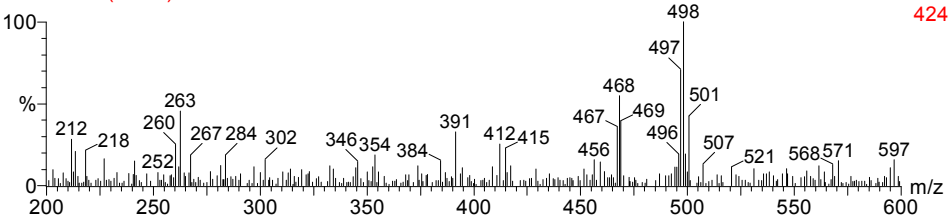

1: Scan AP+

424

480

712-99 691 (11.642)

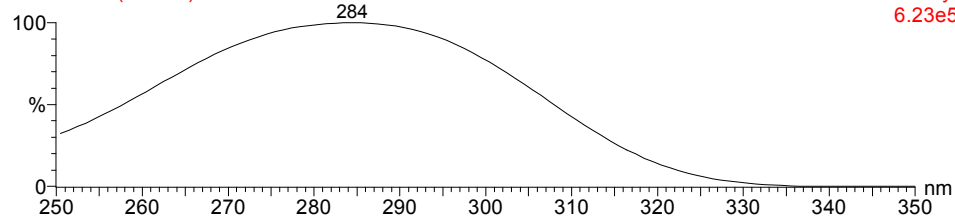

480

2: Diode Array 712-99 638 (11.727)

6.23e5

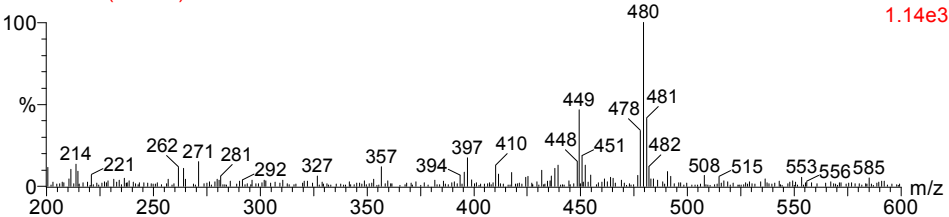

1: Scan AP+

1.14e3

498

713-99 708 (11.912)

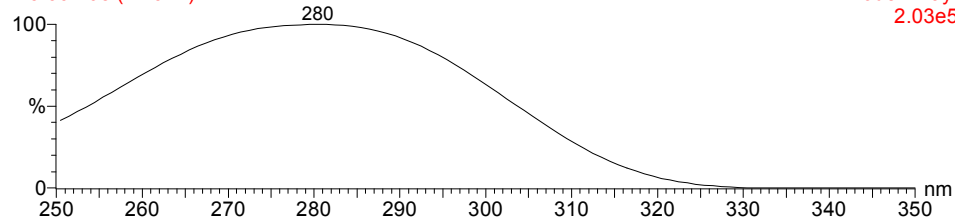

498

2: Diode Array 713-99 648 (11.911)

2.03e5

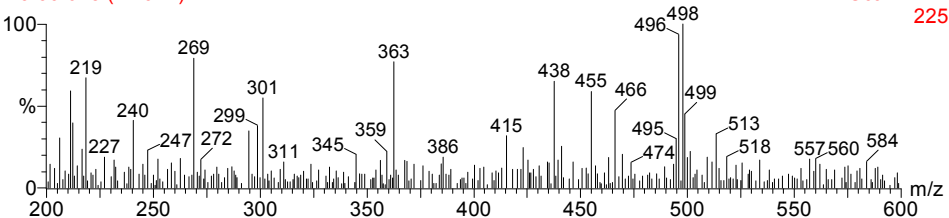

1: Scan AP+

225

516

717-99 460 (7.783)

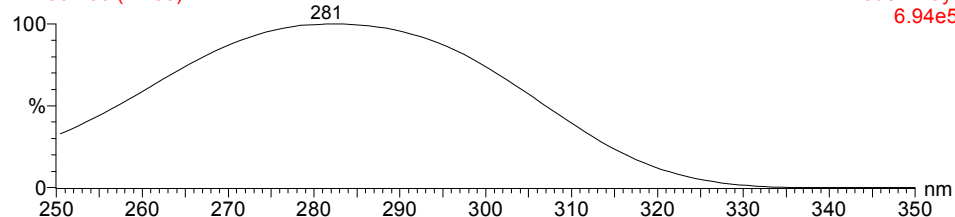

516

2: Diode Array 717-99 427 (7.858)

6.94e5

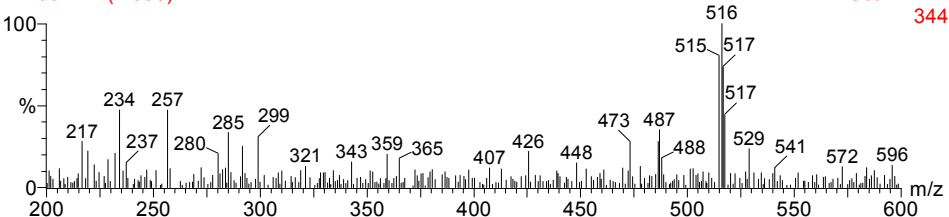

1: Scan AP+

344

516

718-99 669 (11.272)

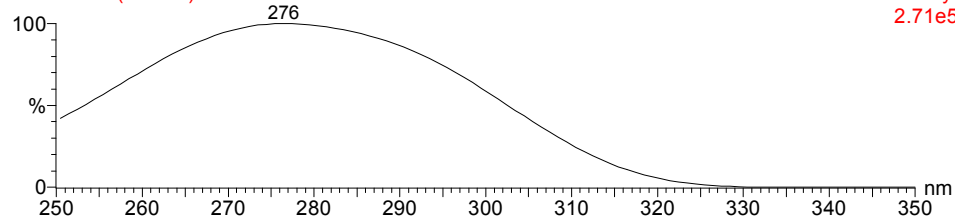

516

2: Diode Array 718-99 619 (11.379)

2.71e5

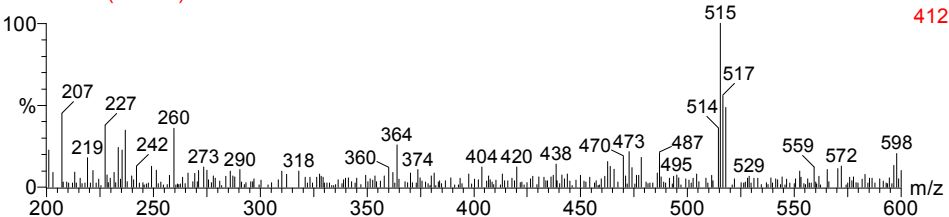

1: Scan AP+

412

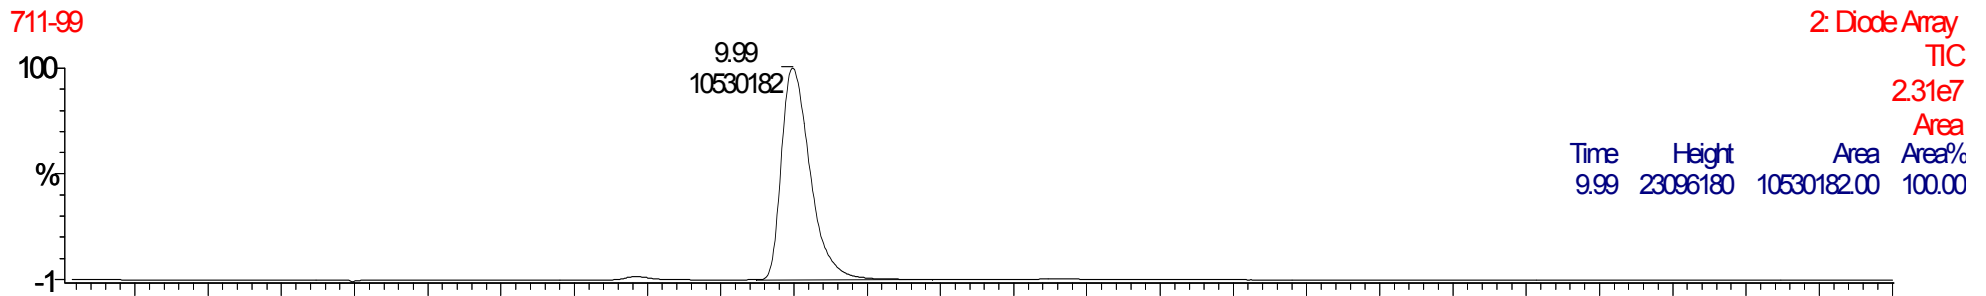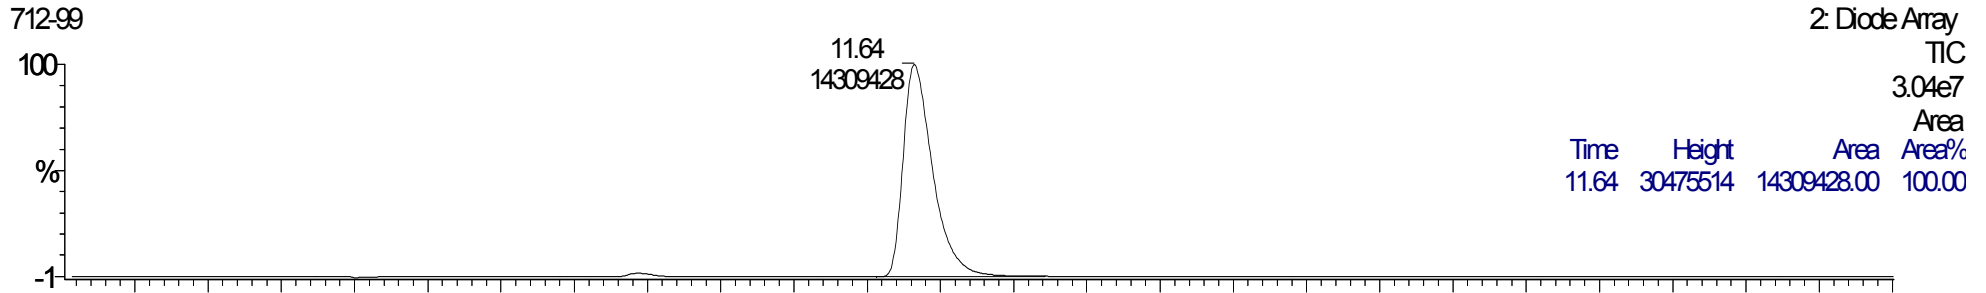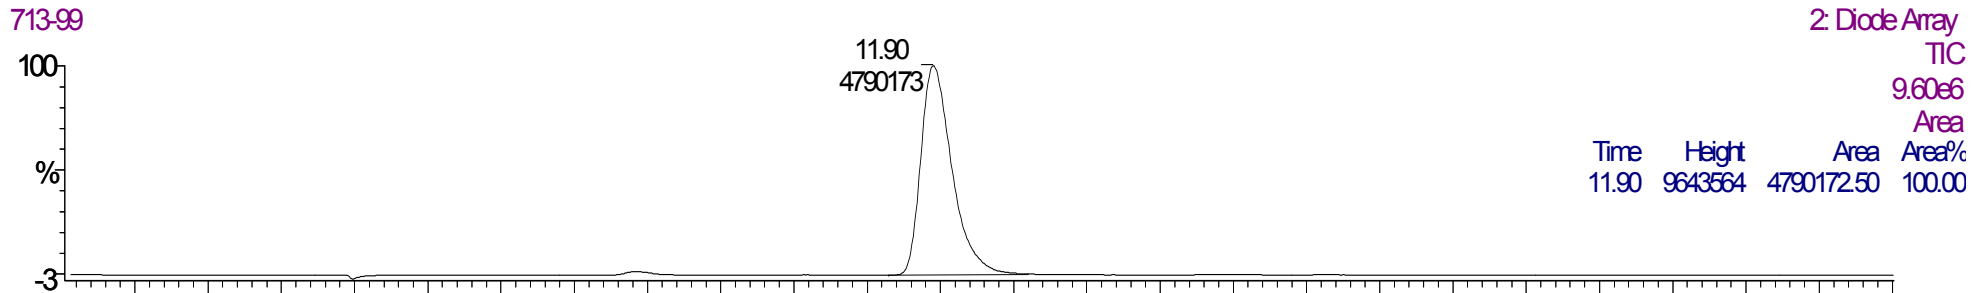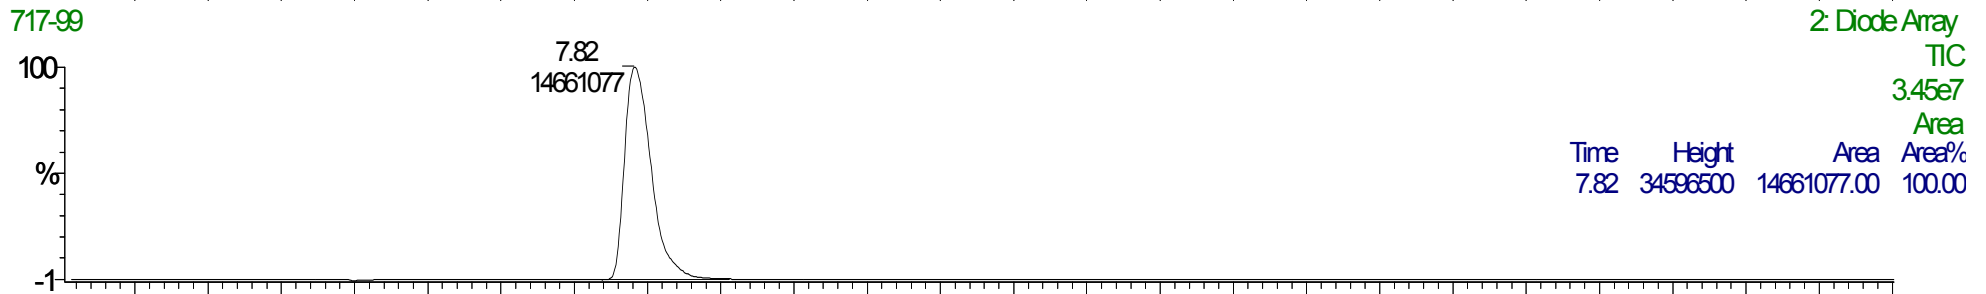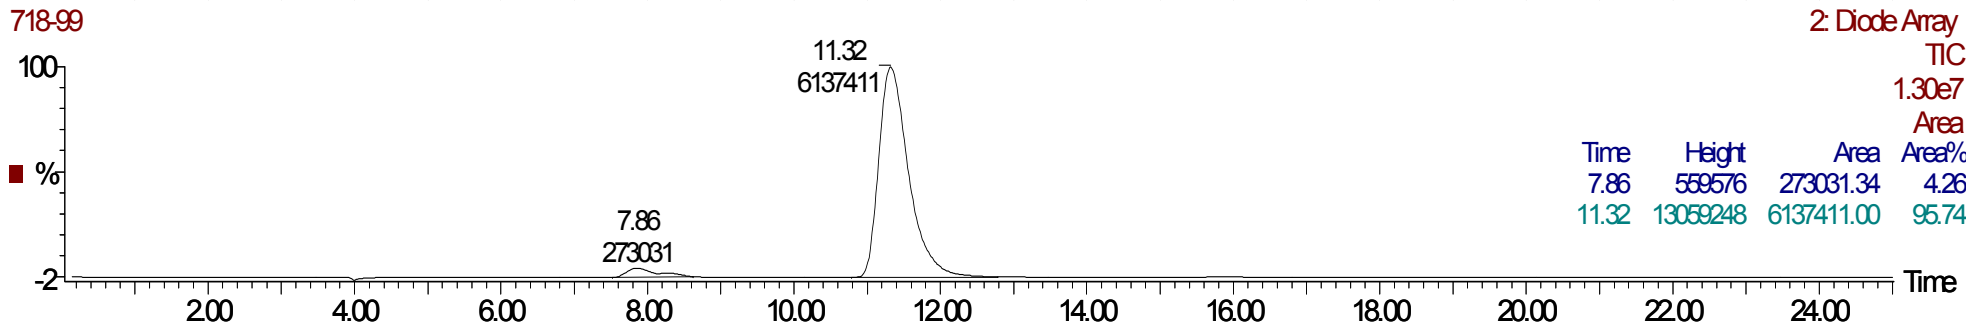



480

721-99 633 (10.672)

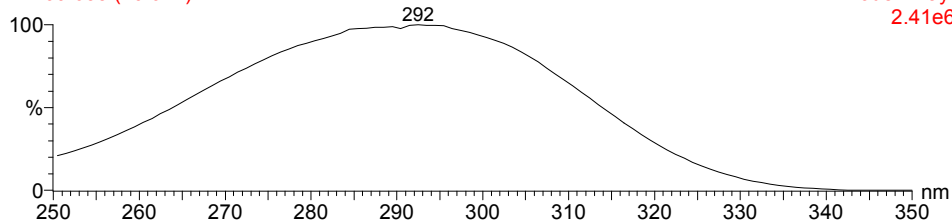

480

2: Diode Array 721-99 591 (10.864)

2.41e6

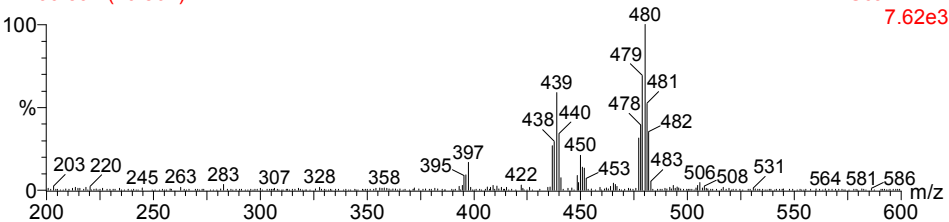

1: Scan AP+ 7.62e3

462

722-99 744 (12.510)

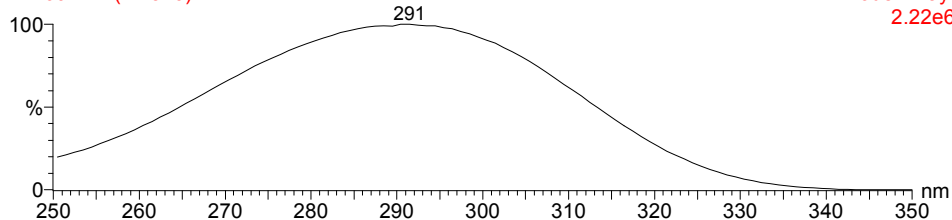

462

2: Diode Array 722-99 684 (12.569)

2.22e6

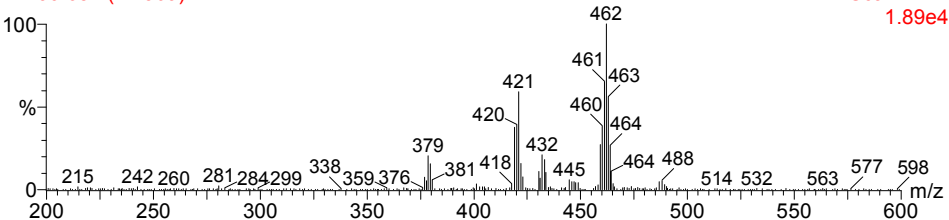

1: Scan AP+ 1.89e4

480

723-99 752 (12.645)

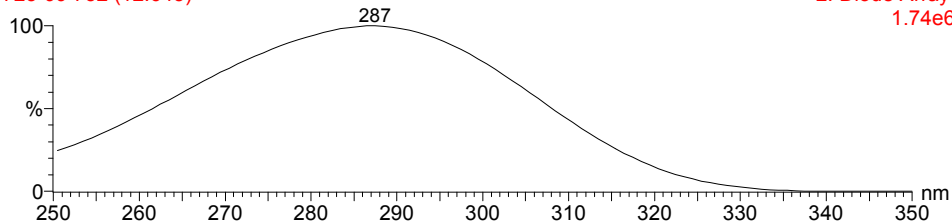

480

2: Diode Array 723-99 690 (12.679)

1.74e6

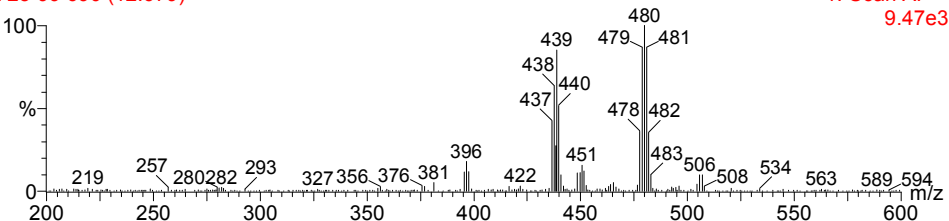

1: Scan AP+ 9.47e3

498

727-99 502 (8.483)

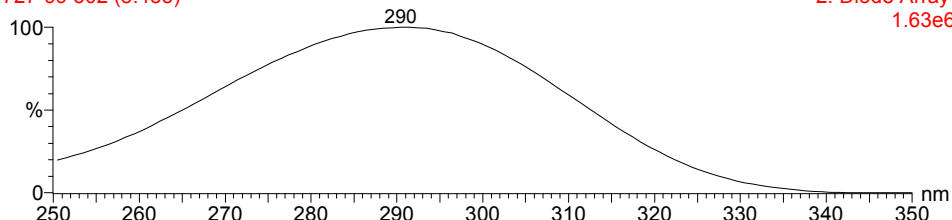

498

2: Diode Array 727-99 464 (8.537)

1.63e6

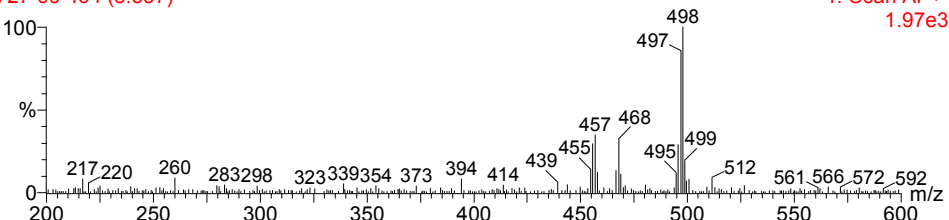

1: Scan AP+ 1.97e3

498

728-99 721 (12.137)

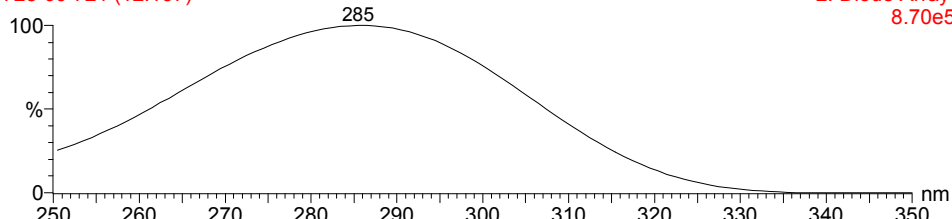

498

2: Diode Array 728-99 672 (12.350)

8.70e5

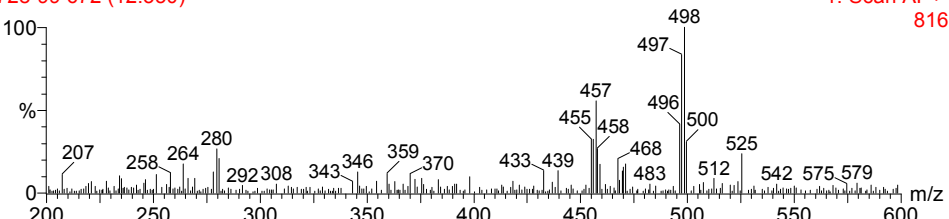

1: Scan AP+ 816

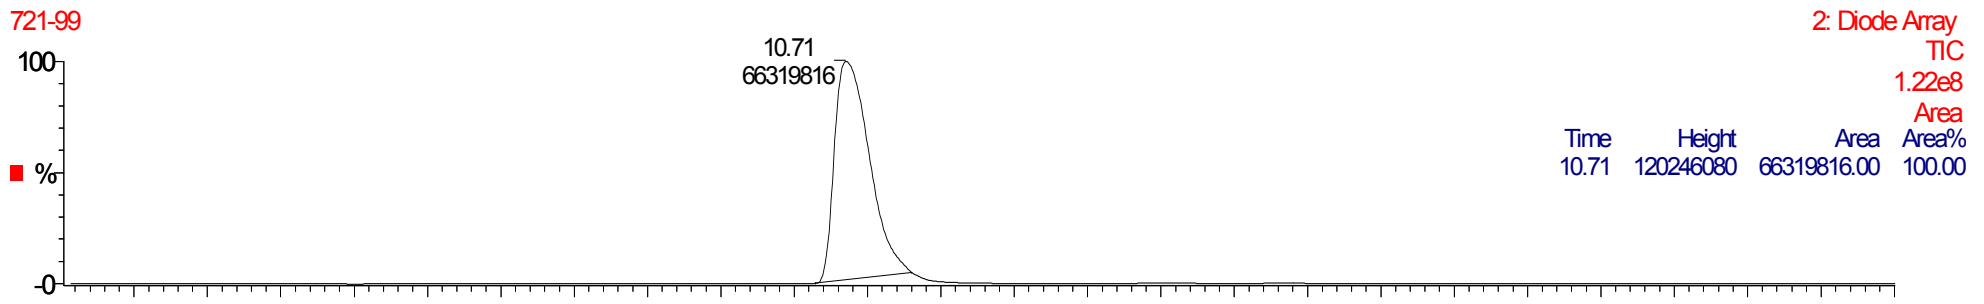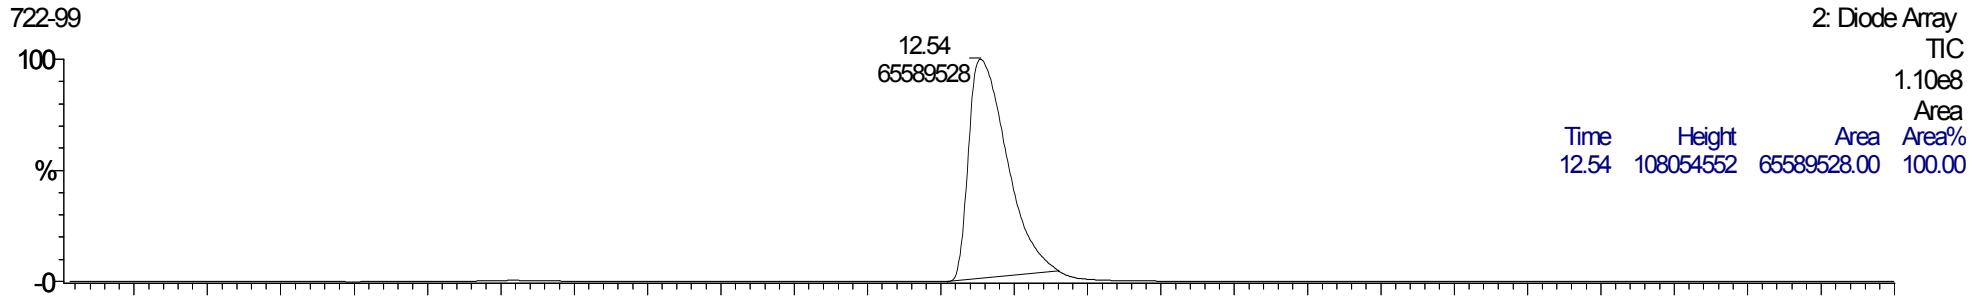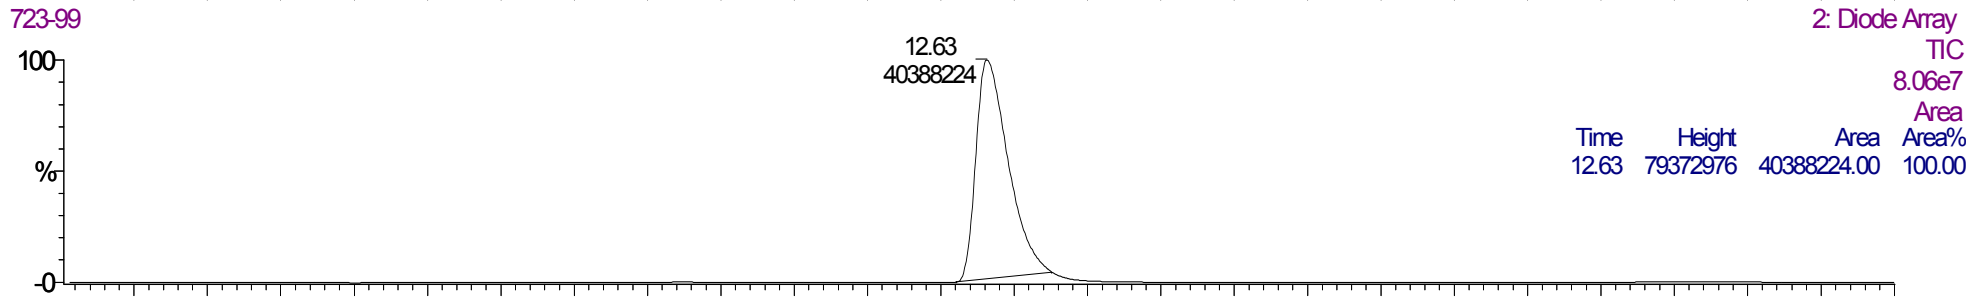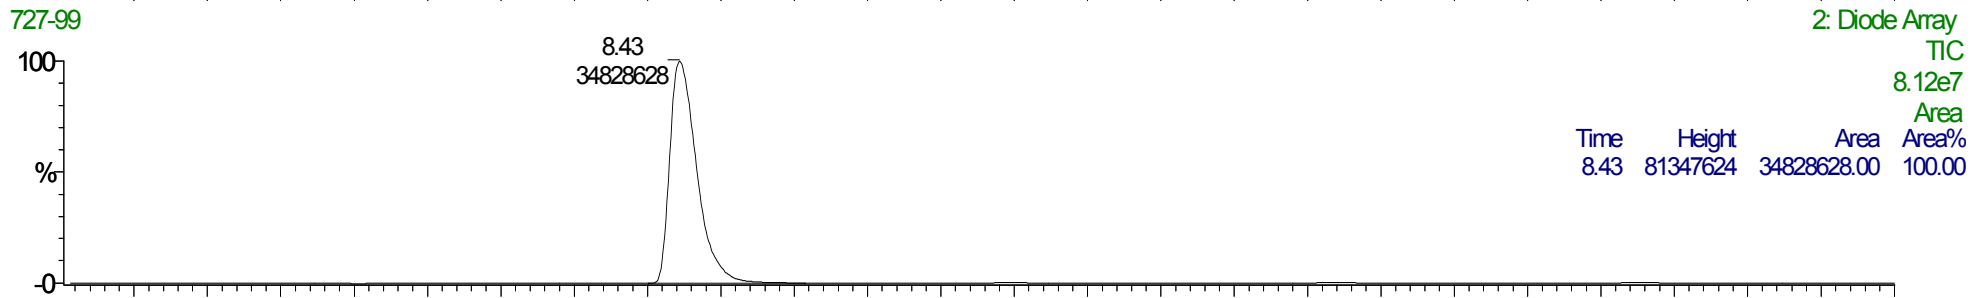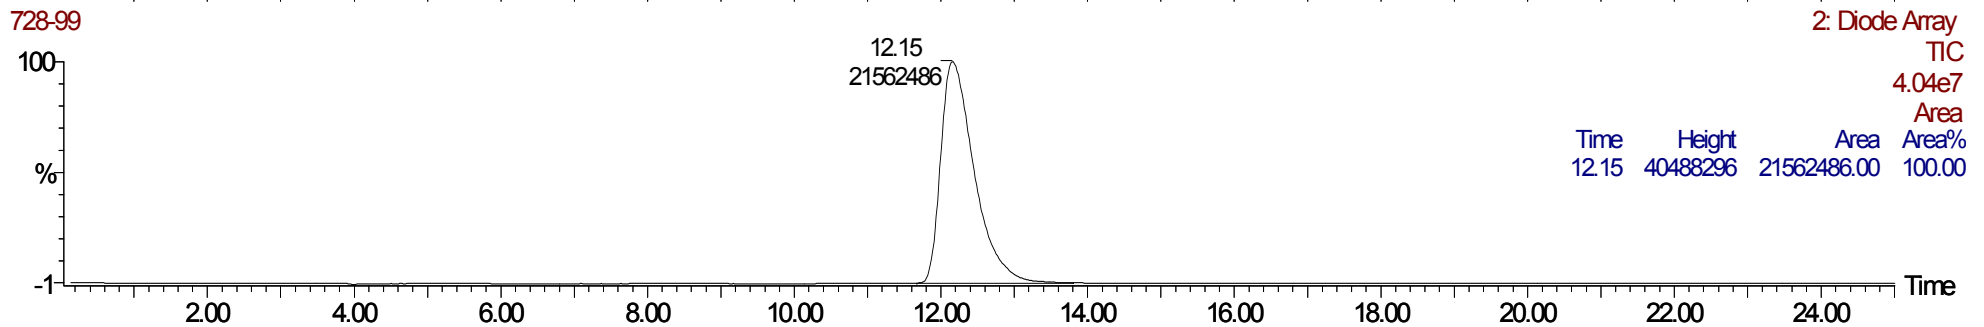

462

2-4-7 405 (6.857)

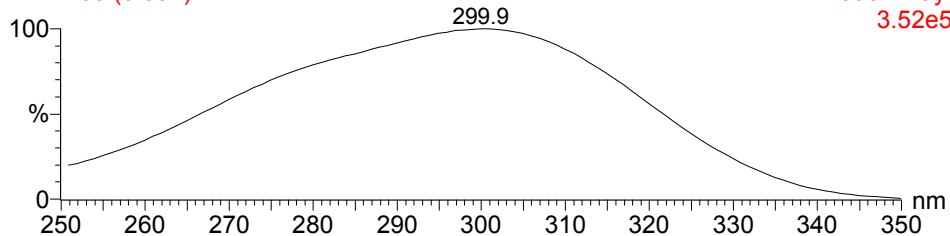

462

2: Diode Array 2-4-7 374 (6.882)

3.52e5

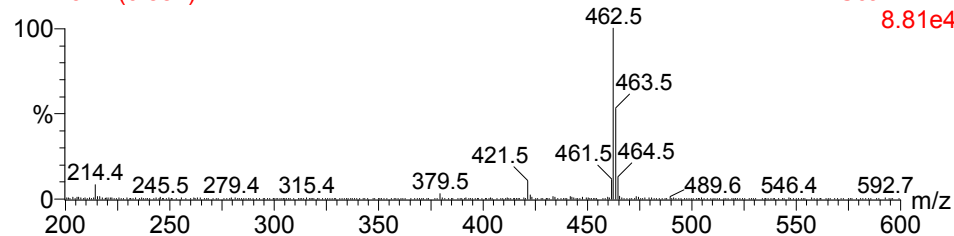

1: Scan AP+

8.81e4

462

3-4-1 578 (9.745)

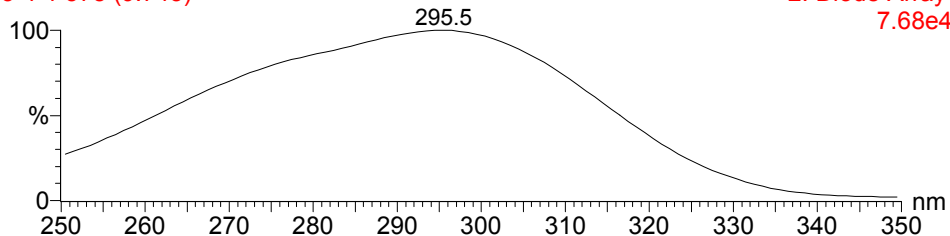

462

2: Diode Array 3-4-1 532 (9.779)

7.68e4

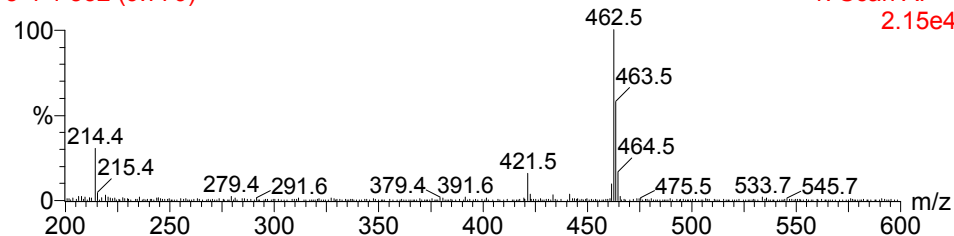

1: Scan AP+

2.15e4

462

3-4-3 731 (12.293)

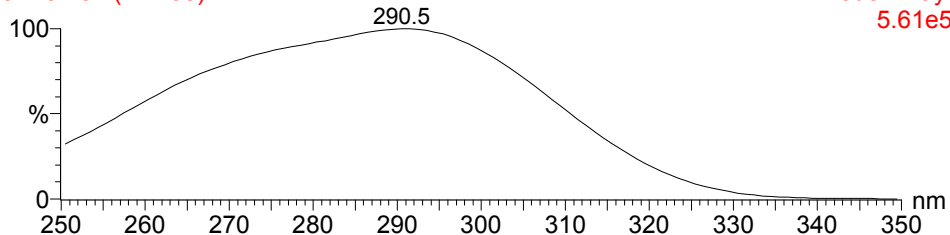

462

2: Diode Array 3-4-3 675 (12.401)

5.61e5

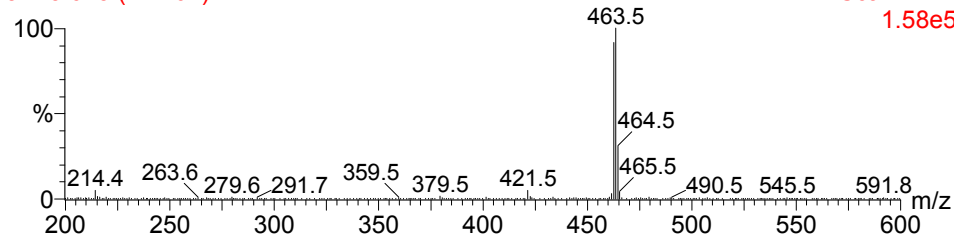

1: Scan AP+

1.58e5

480

3-4-8 675 (11.358)

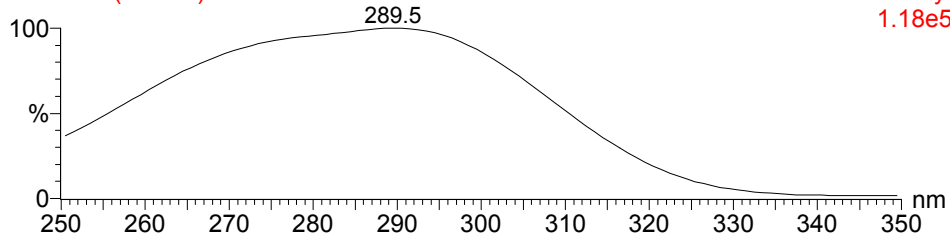

480

2: Diode Array 3-4-8 618 (11.356)

1.18e5

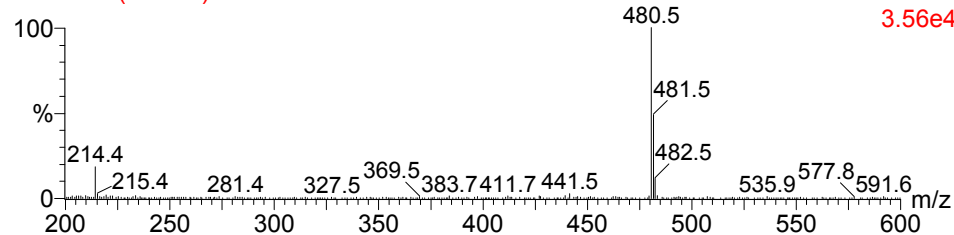

1: Scan AP+

3.56e4

480

7-4-3 416 (7.038)

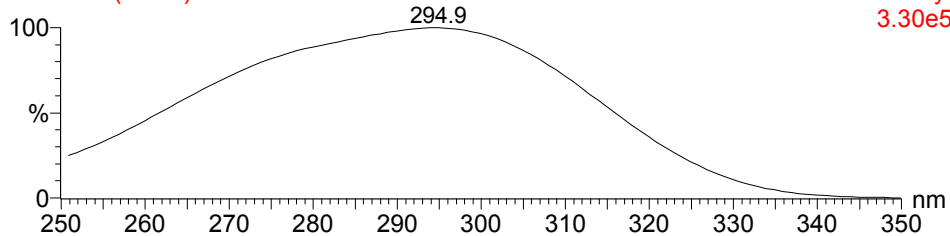

480

2: Diode Array 7-4-3 383 (7.047)

3.30e5

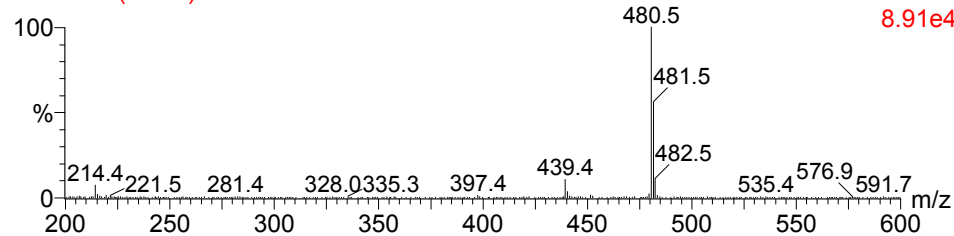

1: Scan AP+

8.91e4

2-4-7

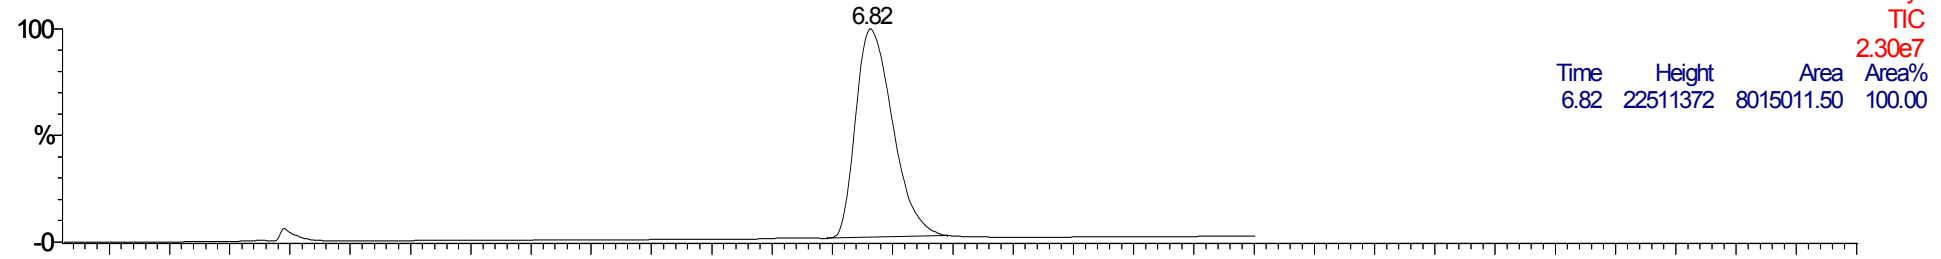

3-4-1

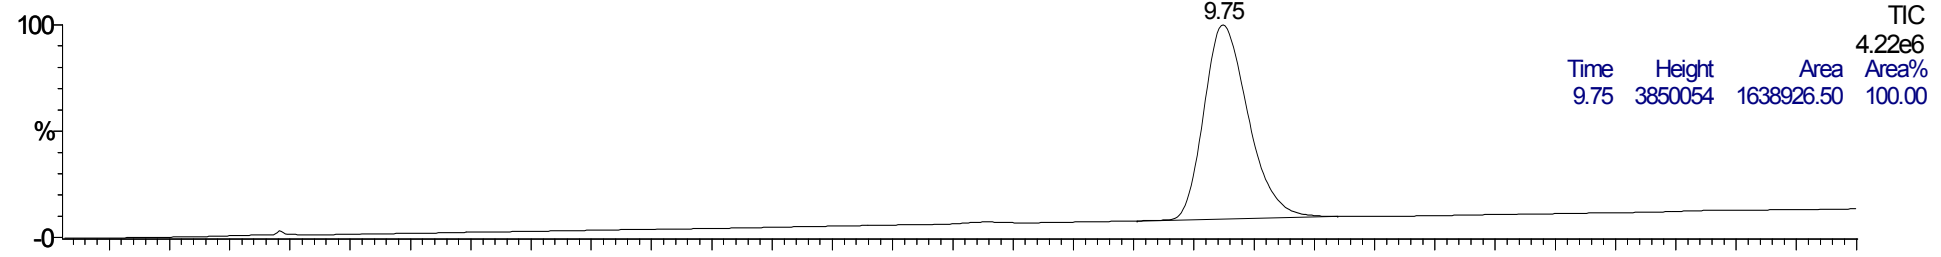

3-4-3

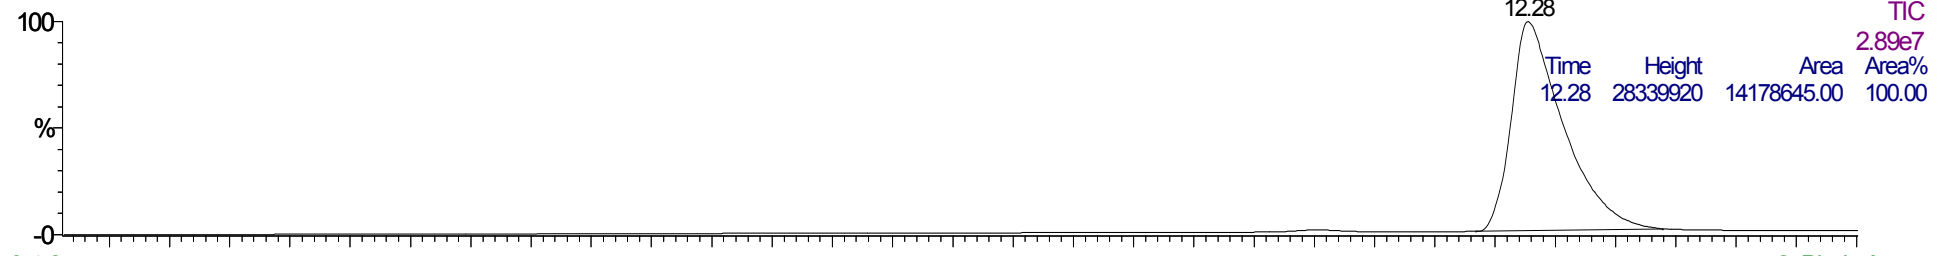

3-4-8

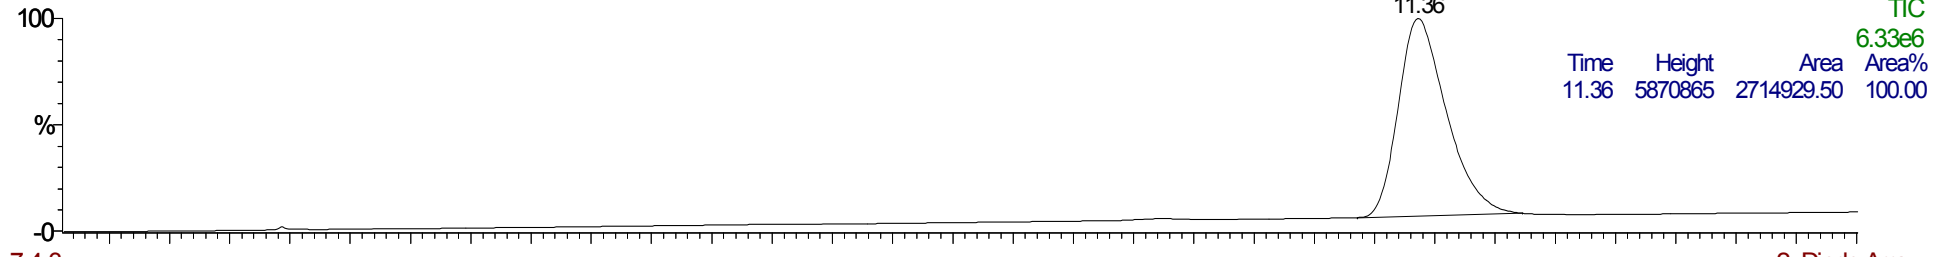

7-4-3

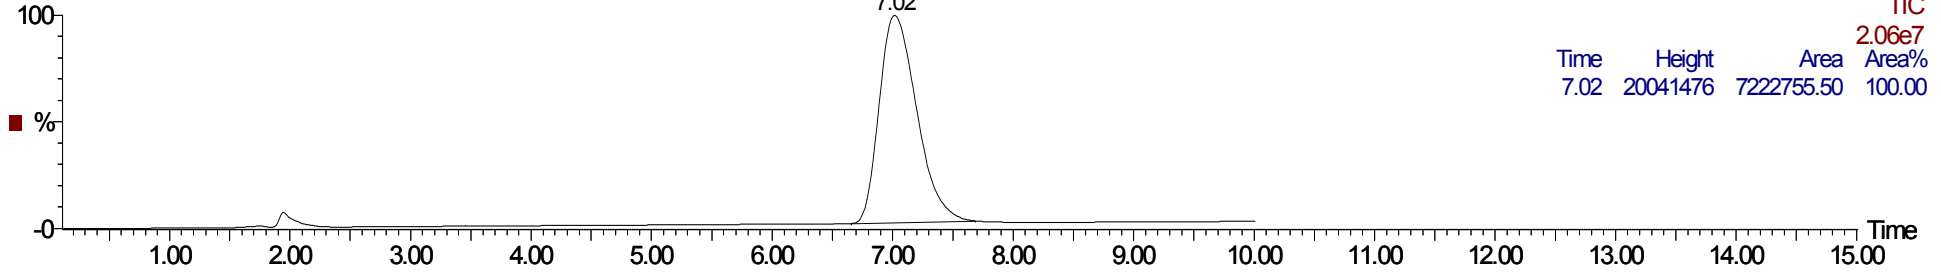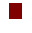

462

7-5-1 351 (5.957)

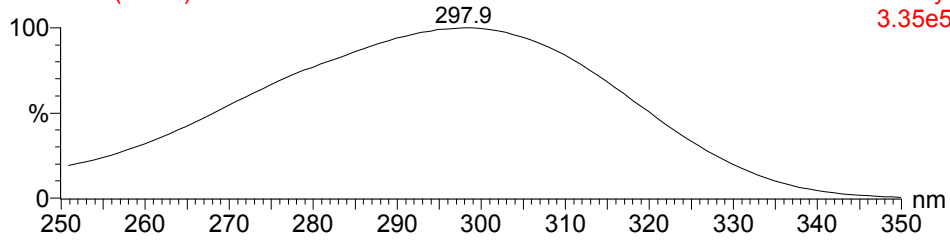

462

2: Diode Array 7-5-1 327 (6.020)

3.35e5

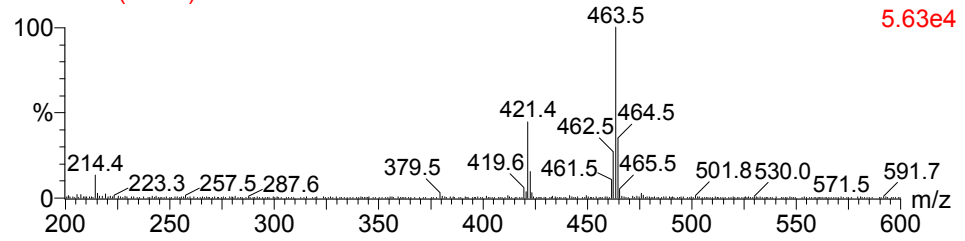

1: Scan AP+

5.63e4

444

7-5-2 449 (7.593)

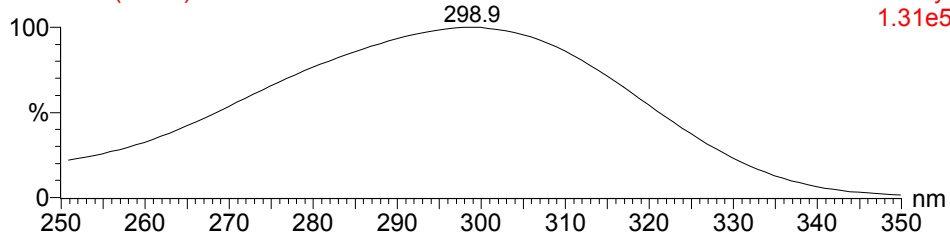

444

2: Diode Array 7-5-2 417 (7.671)

1.31e5

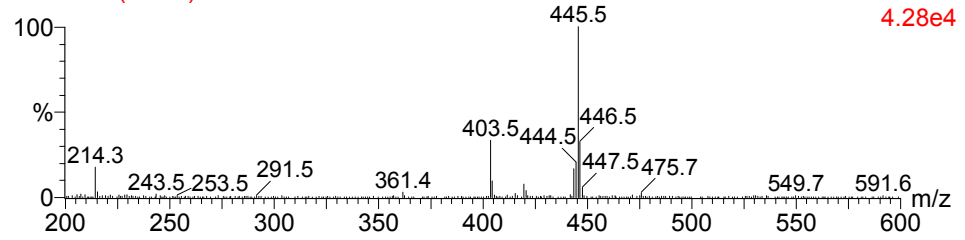

1: Scan AP+

4.28e4

462

7-5-3 391 (6.632)

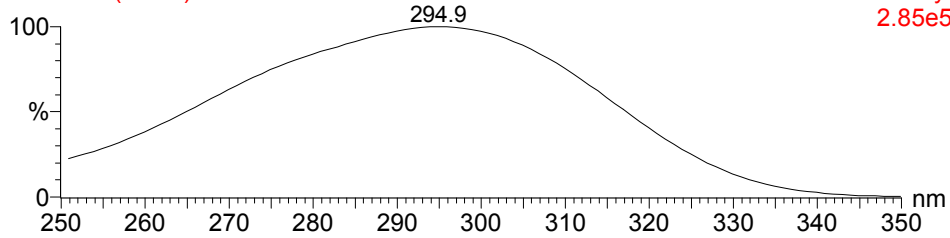

462

2: Diode Array 7-5-3 363 (6.680)

2.85e5

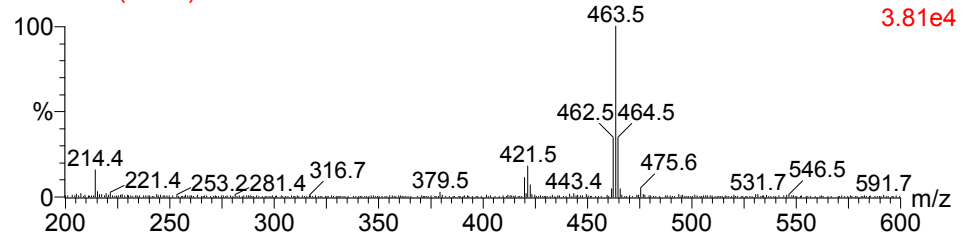

1: Scan AP+

3.81e4

480

7-5-7 258 (4.403)

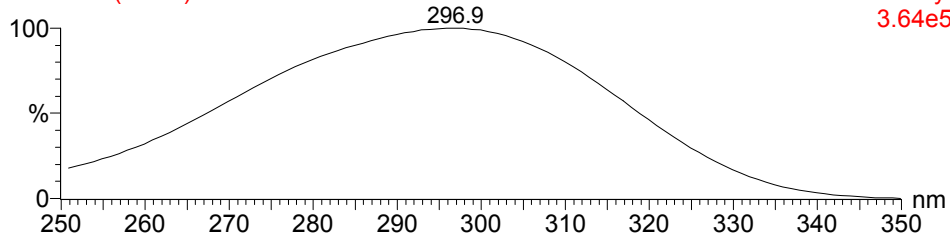

480

2: Diode Array 7-5-7 241 (4.444)

3.64e5

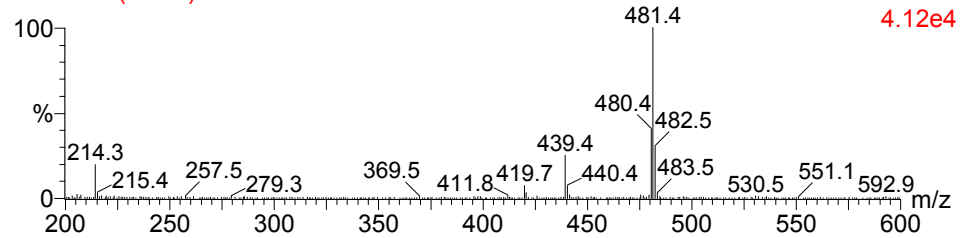

1: Scan AP+

4.12e4

480

7-5-8 360 (6.108)

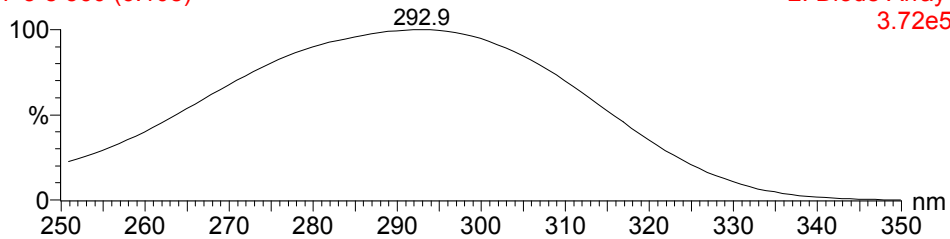

480

2: Diode Array 7-5-8 331 (6.094)

3.72e5

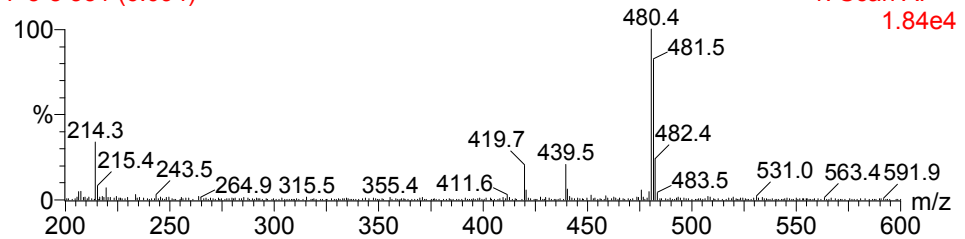

1: Scan AP+

1.84e4

7-5-1

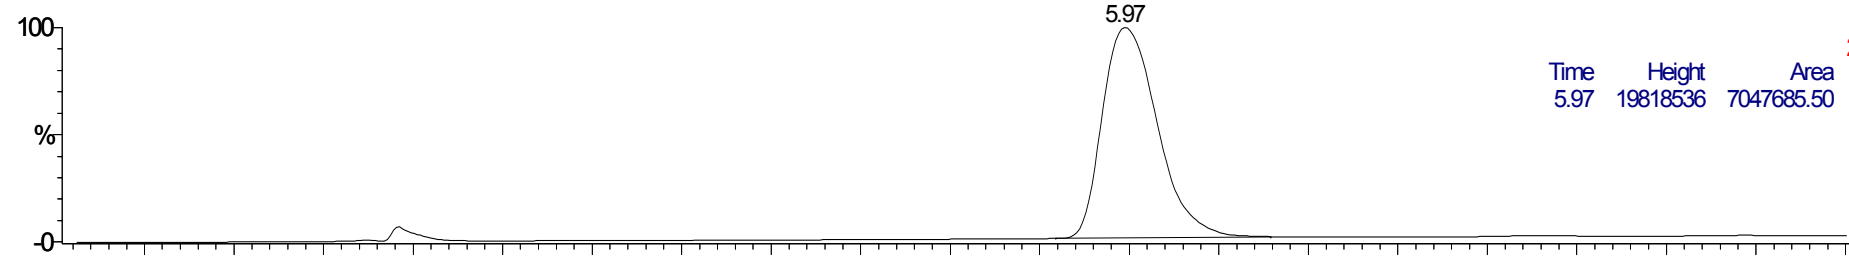

2: Diode Array  
TIC  
2.02e7

| Time | Height   | Area       | Area%  |
|------|----------|------------|--------|
| 5.97 | 19818536 | 7047685.50 | 100.00 |

7-5-2

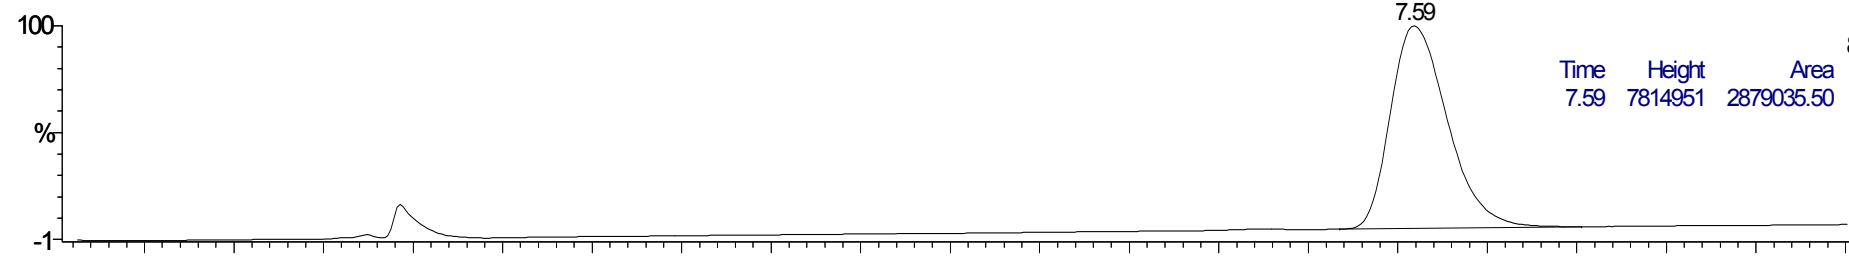

2: Diode Array  
TIC  
8.24e6

| Time | Height  | Area       | Area%  |
|------|---------|------------|--------|
| 7.59 | 7814951 | 2879035.50 | 100.00 |

7-5-3

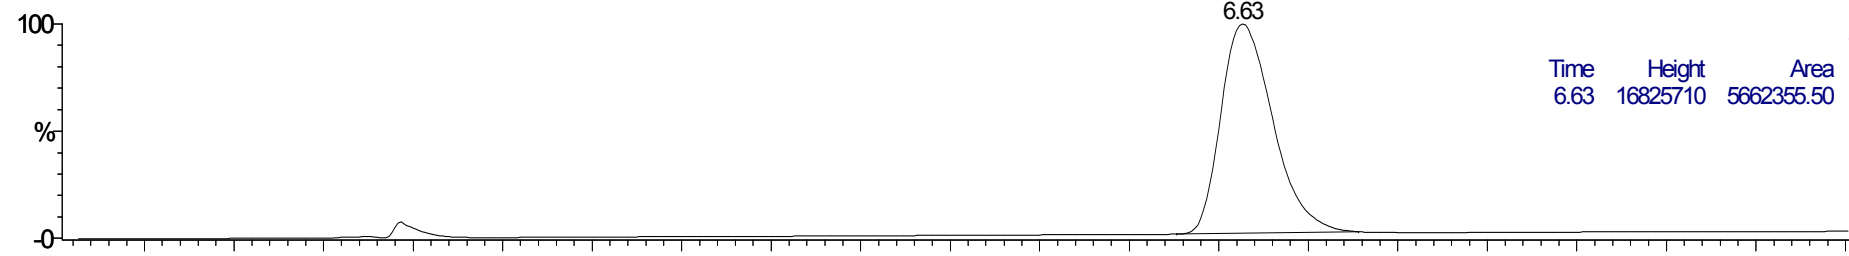

2: Diode Array  
TIC  
1.72e7

| Time | Height   | Area       | Area%  |
|------|----------|------------|--------|
| 6.63 | 16825710 | 5662355.50 | 100.00 |

7-5-7

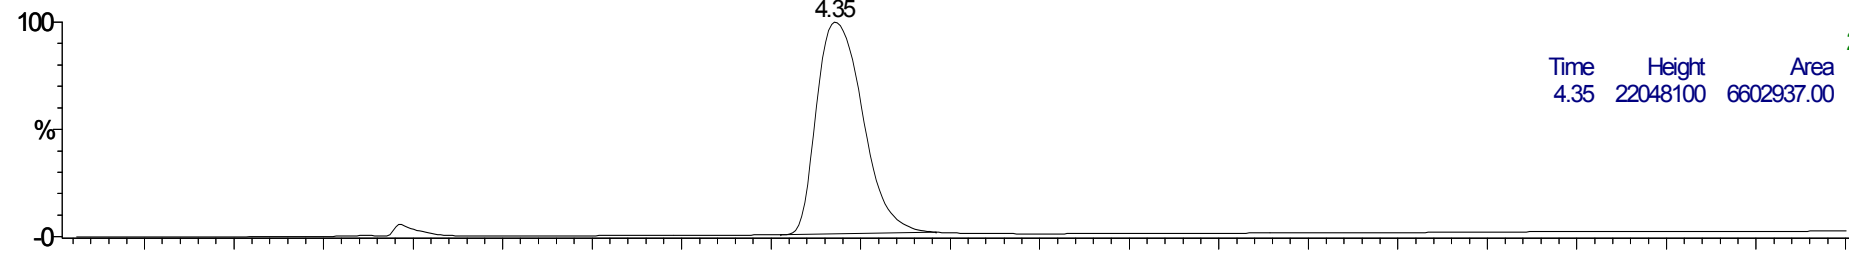

2: Diode Array  
TIC  
2.23e7

| Time | Height   | Area       | Area%  |
|------|----------|------------|--------|
| 4.35 | 22048100 | 6602937.00 | 100.00 |

7-5-8

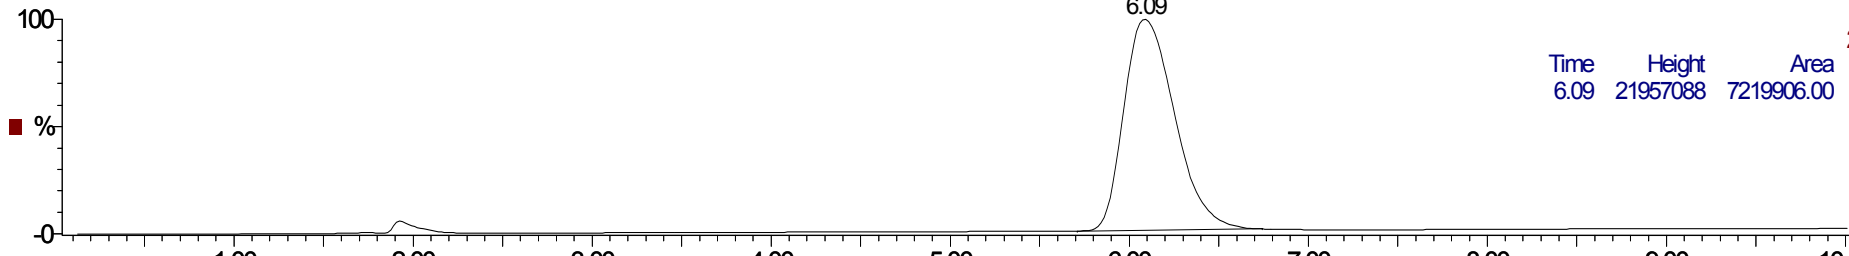

2: Diode Array  
TIC  
2.23e7

| Time | Height   | Area       | Area%  |
|------|----------|------------|--------|
| 6.09 | 21957088 | 7219906.00 | 100.00 |

■ %

1.00 2.00 3.00 4.00 5.00 6.00 7.00 8.00 9.00 10.00 Time

480

7-6-1 310 (5.272)

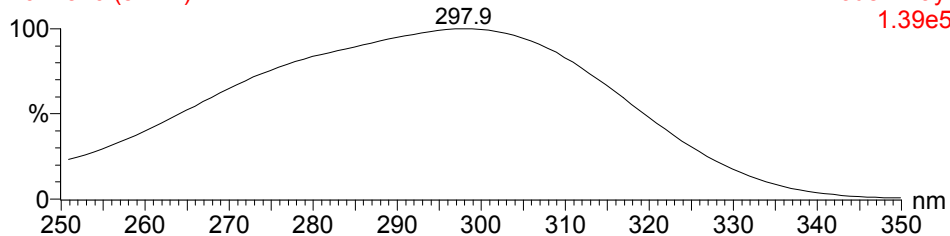

480

2: Diode Array 7-6-1 288 (5.305)

1.39e5

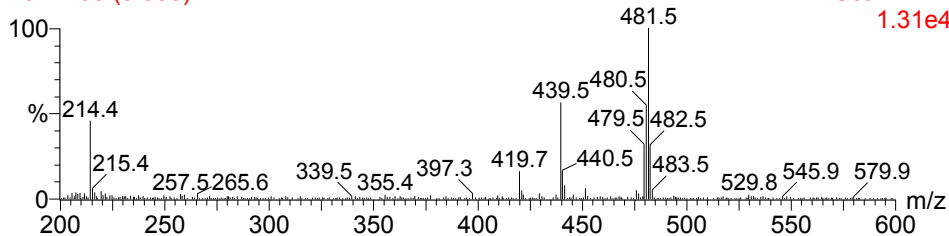

1: Scan AP+

1.31e4

462

7-6-2 377 (6.395)

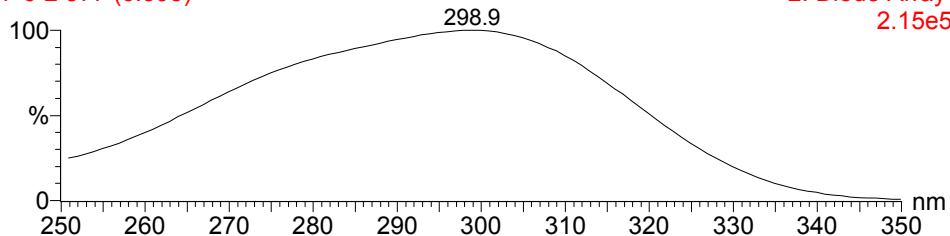

462

2: Diode Array 7-6-2 351 (6.461)

2.15e5

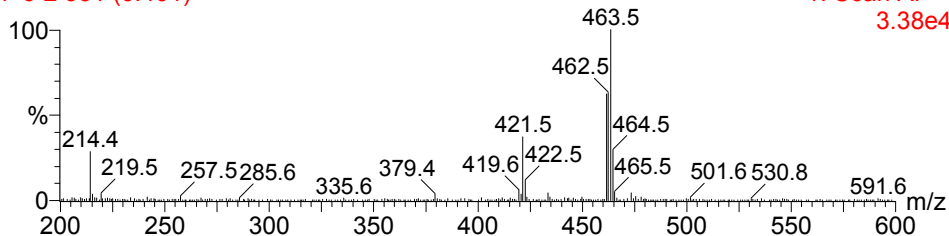

1: Scan AP+

3.38e4

480

7-6-3 396 (6.700)

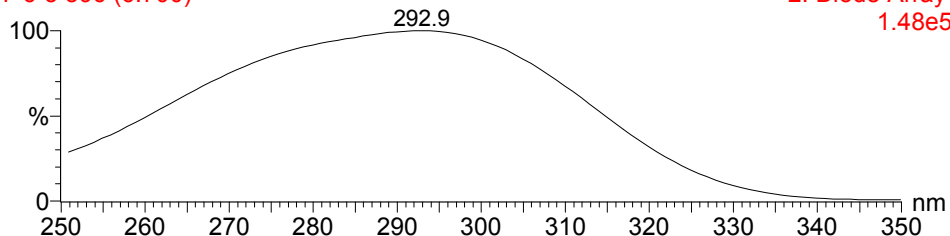

480

2: Diode Array 7-6-3 363 (6.680)

1.48e5

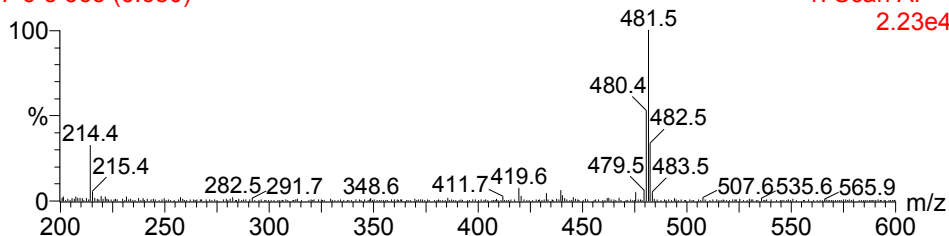

1: Scan AP+

2.23e4

498

7-6-7 231 (3.957)

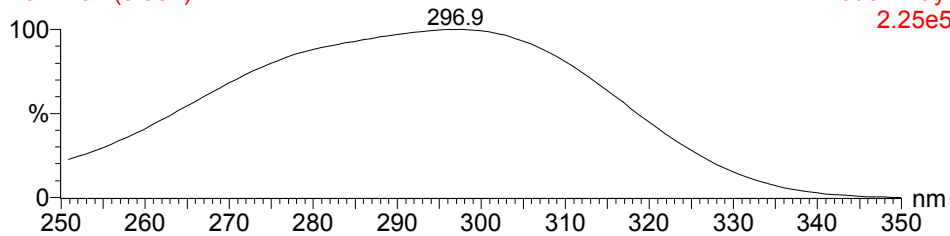

498

2: Diode Array 7-6-7 217 (4.004)

2.25e5

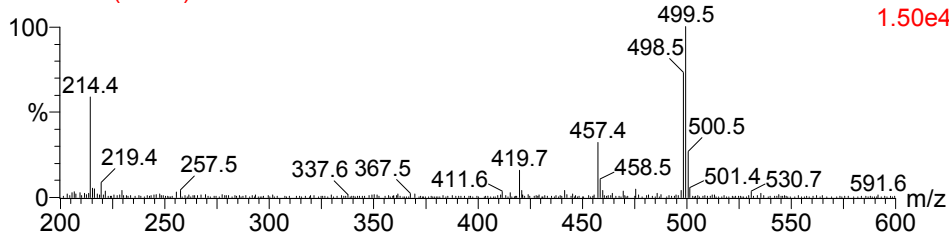

1: Scan AP+

1.50e4

498

7-6-8 353 (5.997)

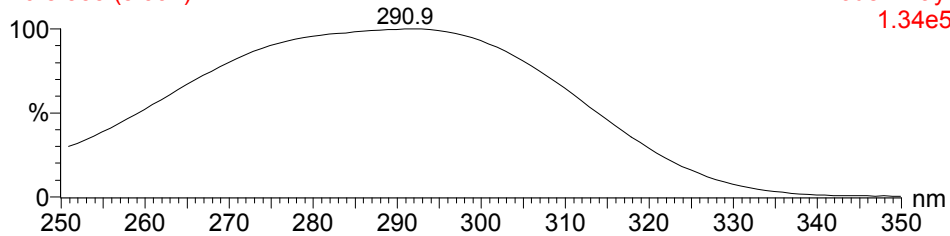

498

2: Diode Array 7-6-8 329 (6.057)

1.34e5

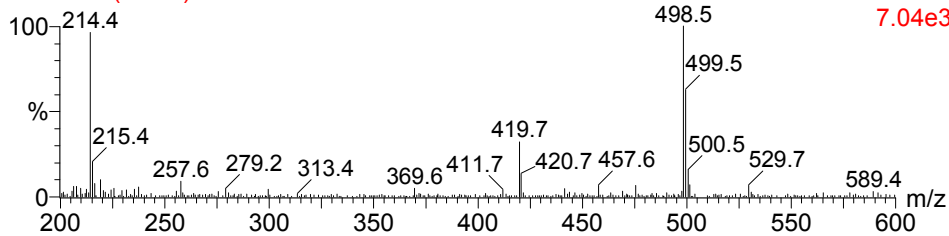

1: Scan AP+

7.04e3

7-6-1

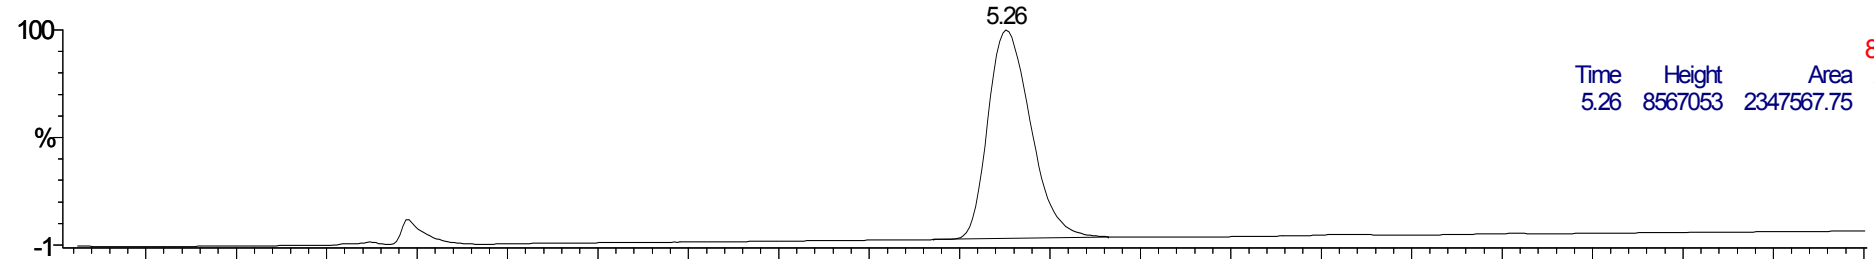

7-6-2

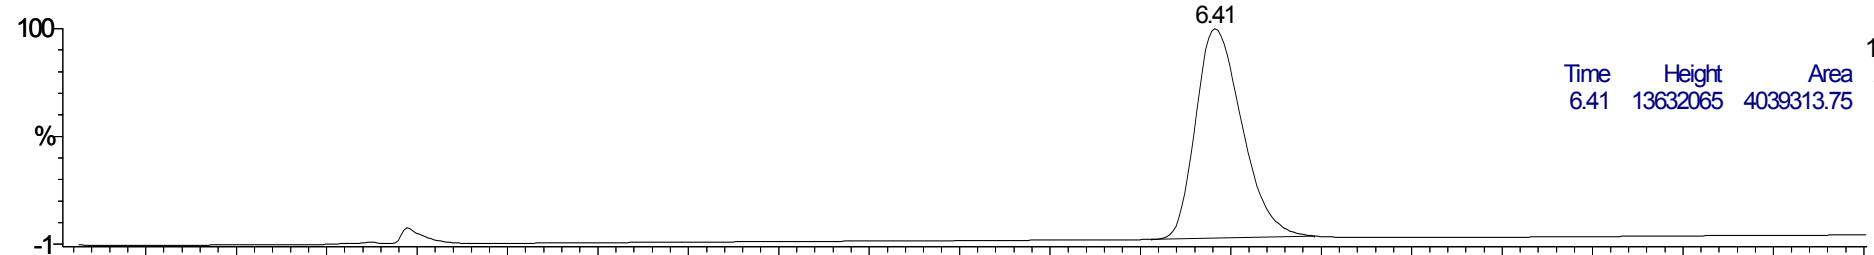

7-6-3

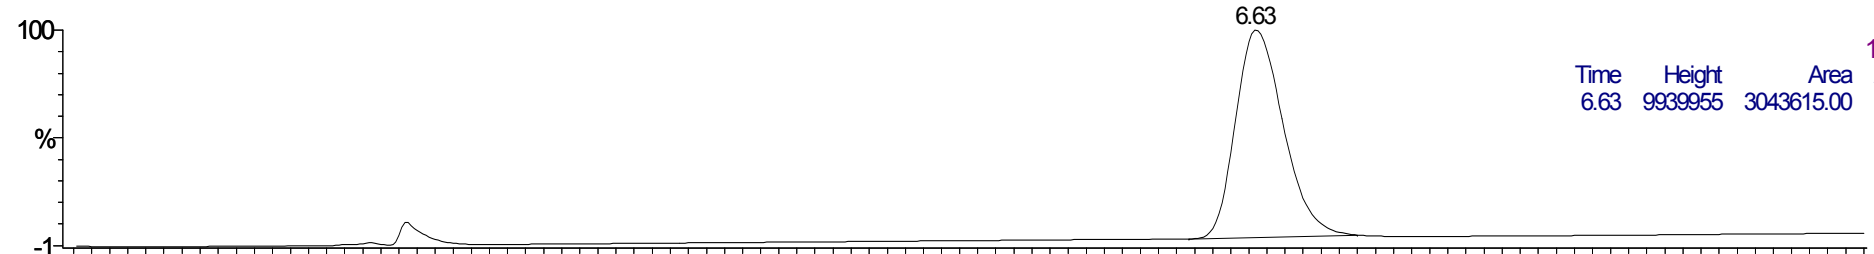

7-6-7

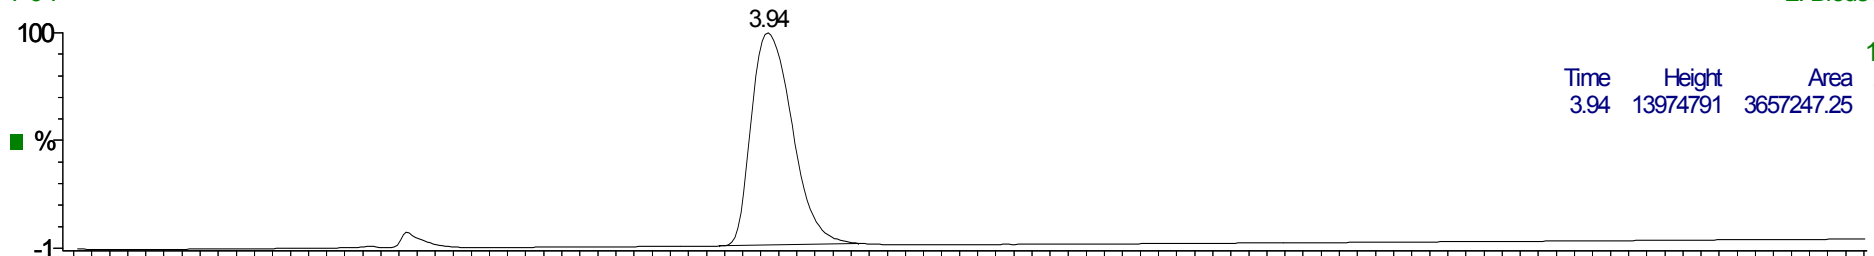

7-6-8

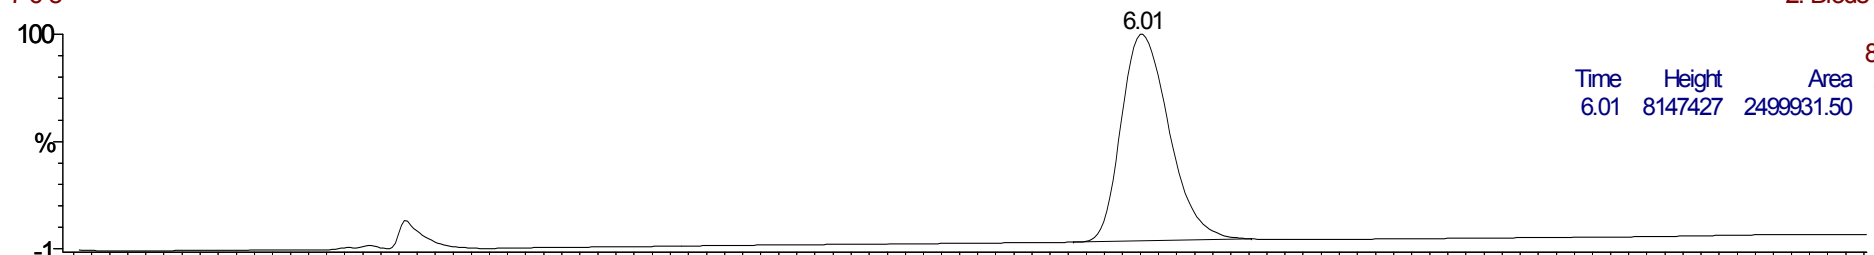

Time



462

7-7-1 365 (6.197)

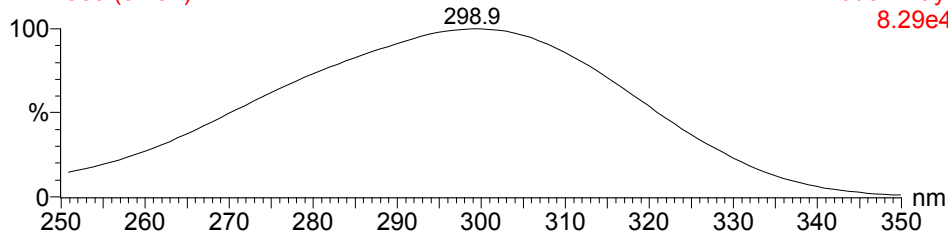

462

2: Diode Array 7-7-1 337 (6.204)

8.29e4

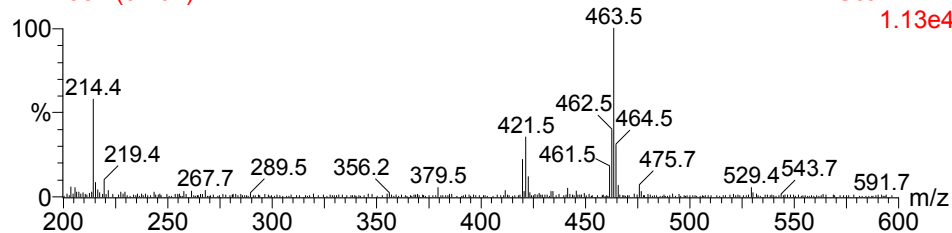

1: Scan AP+

1.13e4

444

7-7-2 457 (7.720)

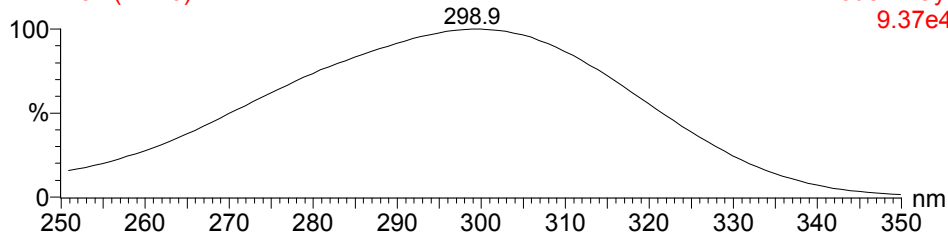

444

2: Diode Array 7-7-2 422 (7.762)

9.37e4

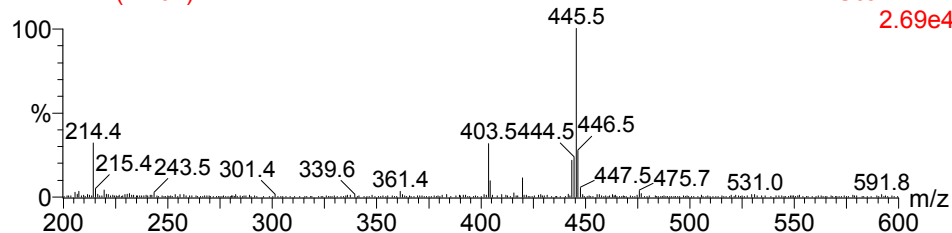

1: Scan AP+

2.69e4

462

7-7-3 460 (7.777)

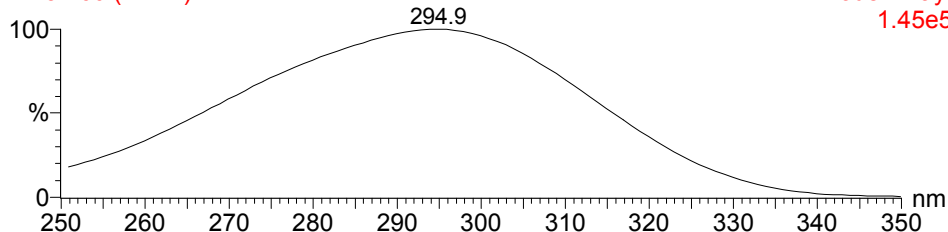

462

2: Diode Array 7-7-3 425 (7.817)

1.45e5

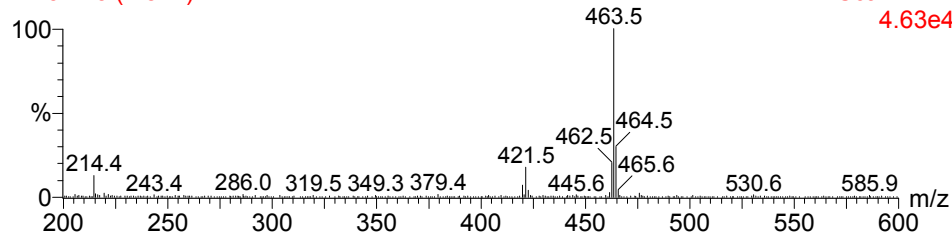

1: Scan AP+

4.63e4

480

7-7-7 267 (4.550)

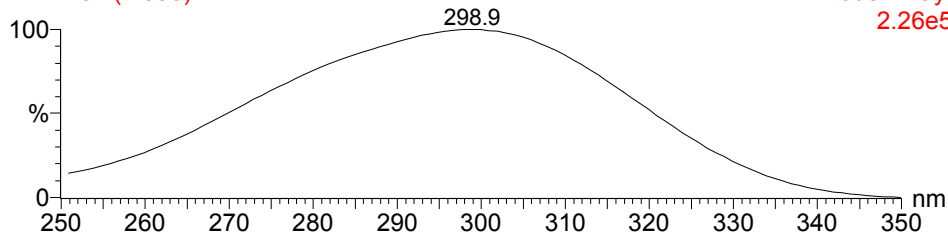

480

2: Diode Array 7-7-7 247 (4.554)

2.26e5

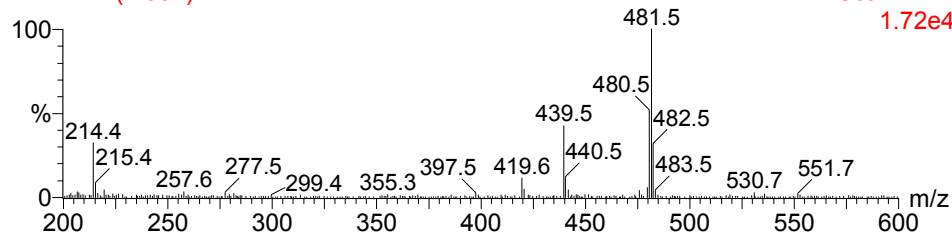

1: Scan AP+

1.72e4

480

7-7-8 414 (7.007)

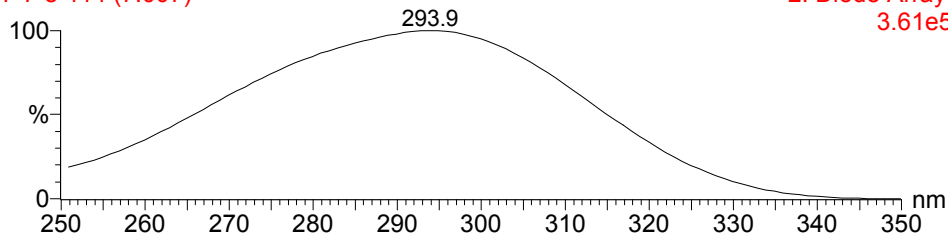

480

2: Diode Array 7-7-8 385 (7.084)

3.61e5

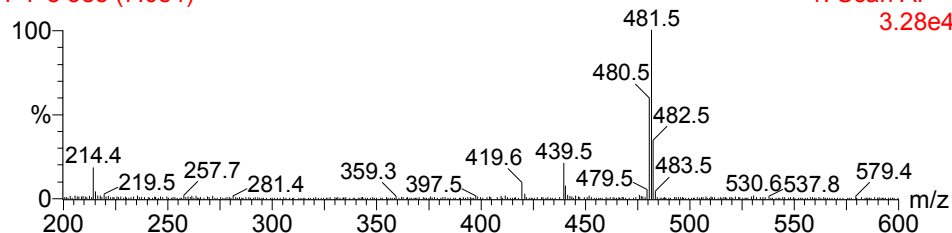

1: Scan AP+

3.28e4

7-7-1

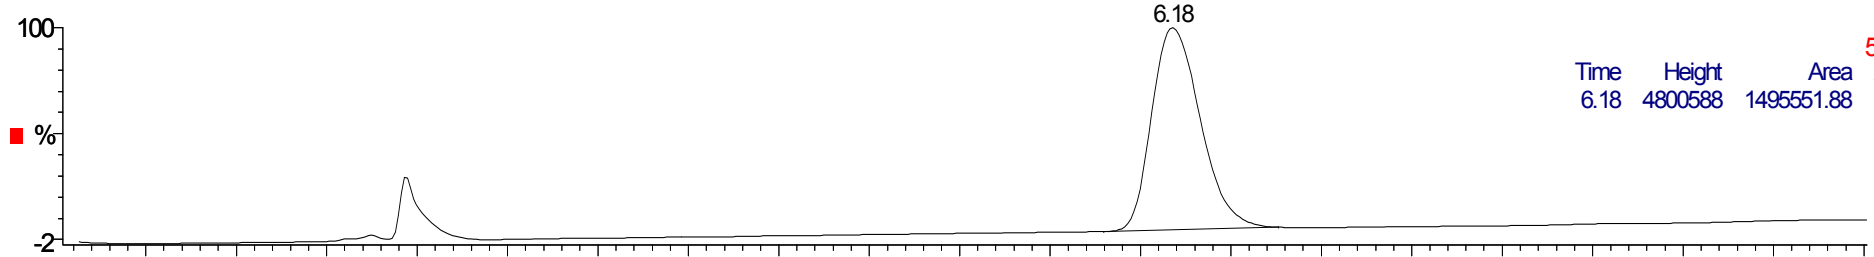

7-7-2

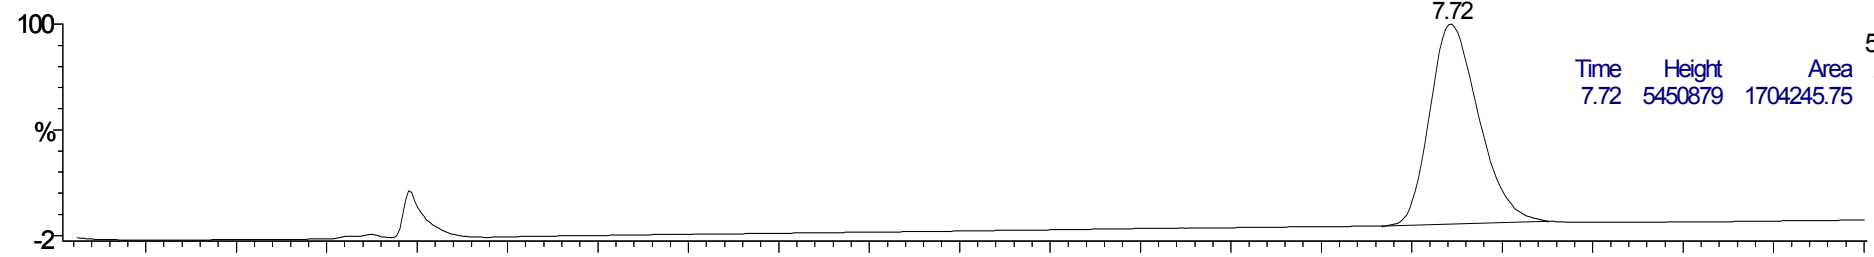

7-7-3

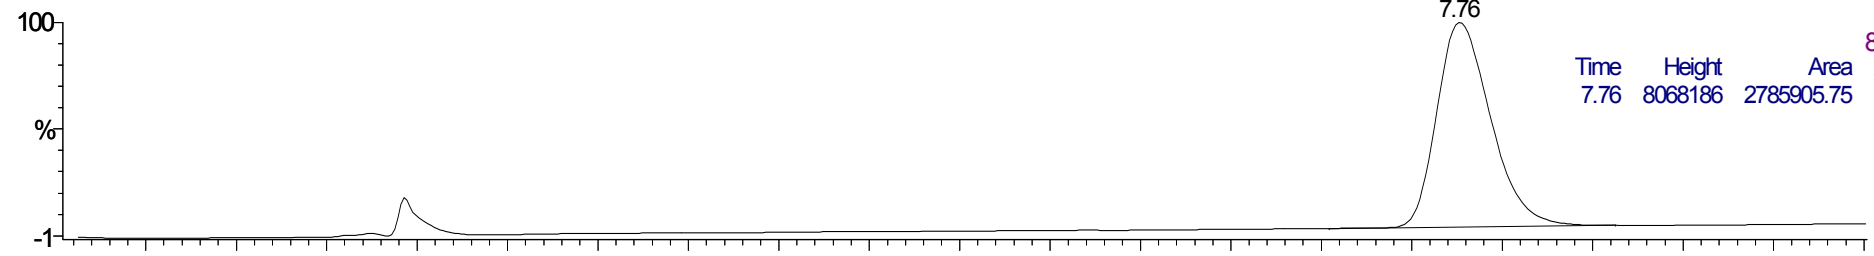

7-7-7

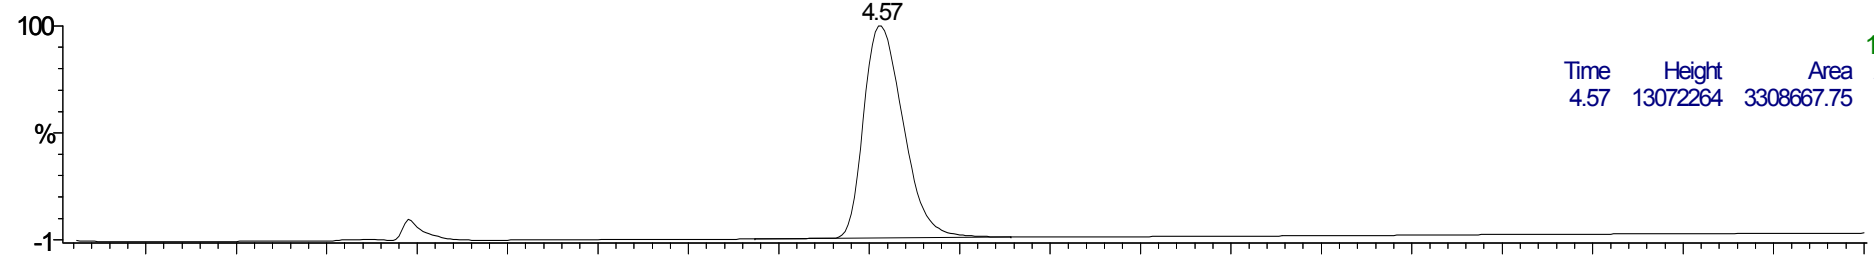

7-7-8

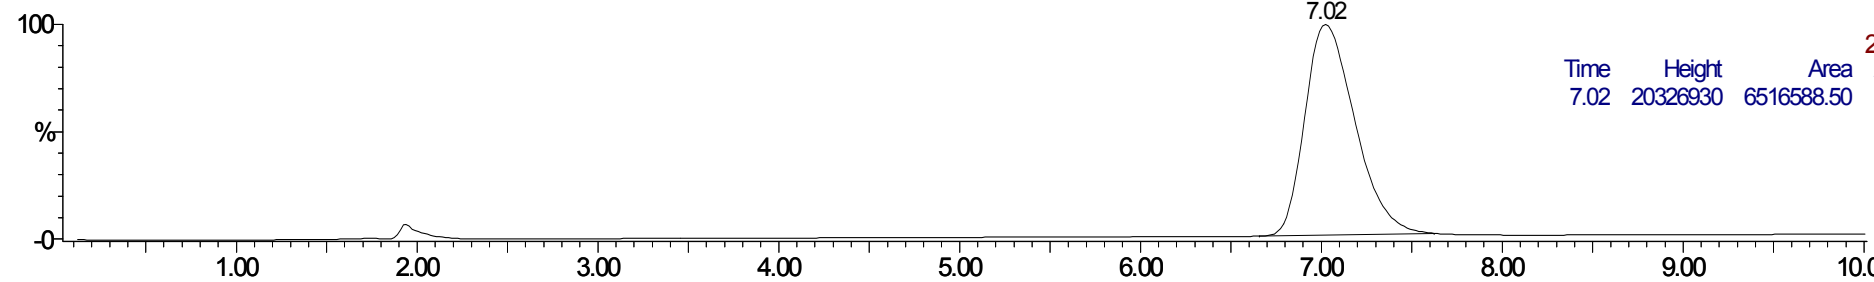

498

7-8-1 299 (5.095)

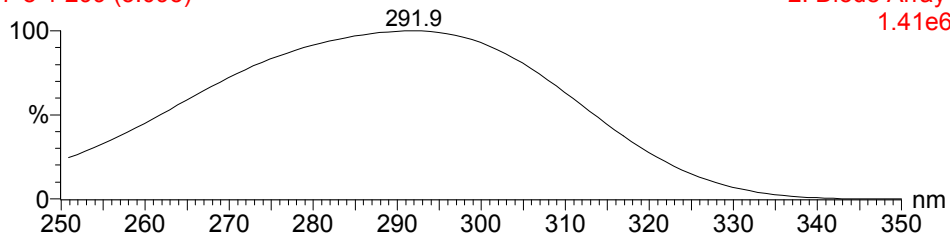

498

2: Diode Array 7-8-1 278 (5.122)

1.41e6

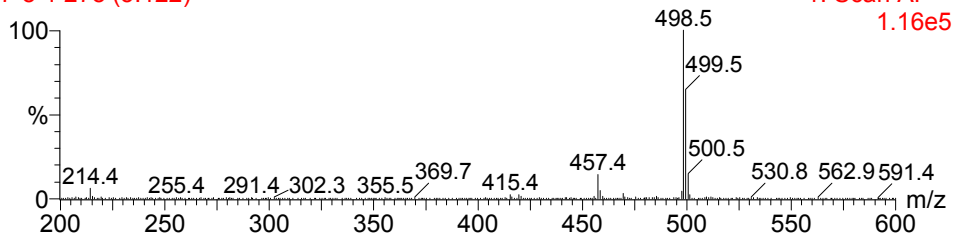

1: Scan AP+

1.16e5

480

7-8-2 341 (5.787)

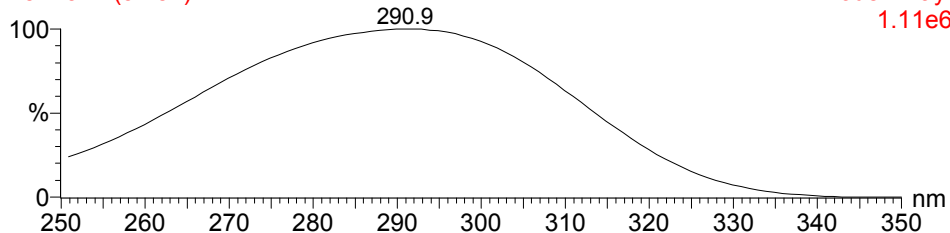

480

2: Diode Array 7-8-2 312 (5.745)

1.11e6

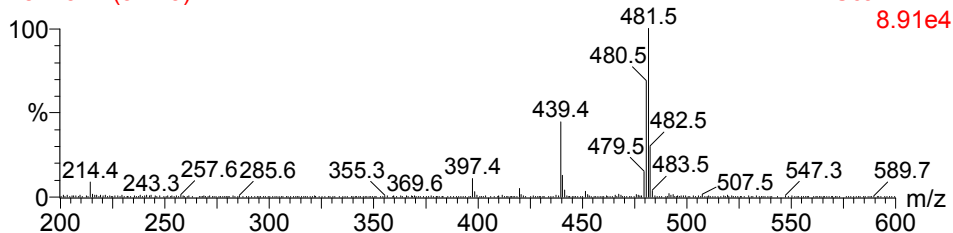

1: Scan AP+

8.91e4

498

7-8-3 336 (5.708)

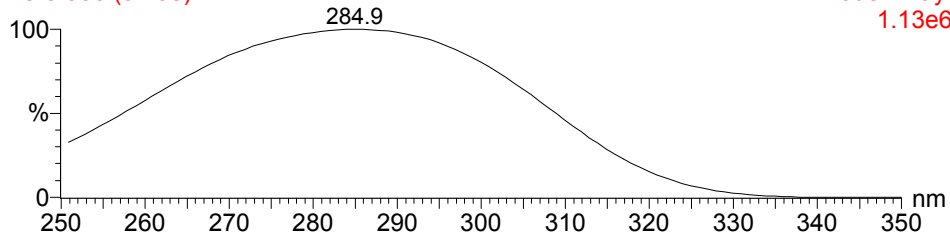

498

2: Diode Array 7-8-3 314 (5.782)

1.13e6

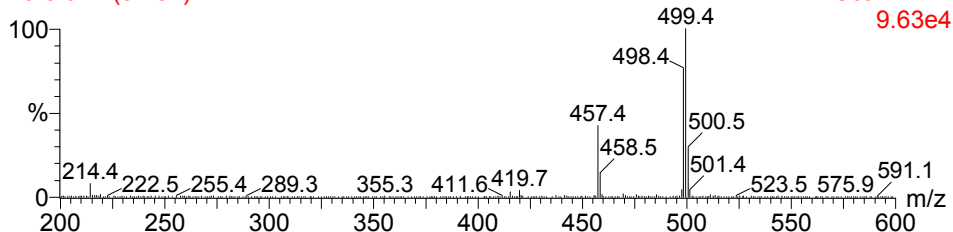

1: Scan AP+

9.63e4

516

7-8-7 237 (4.065)

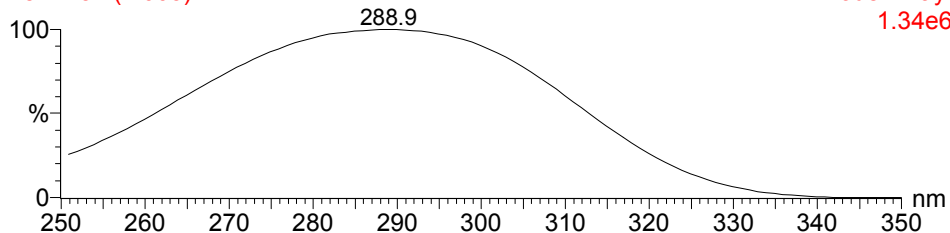

516

2: Diode Array 7-8-7 220 (4.059)

1.34e6

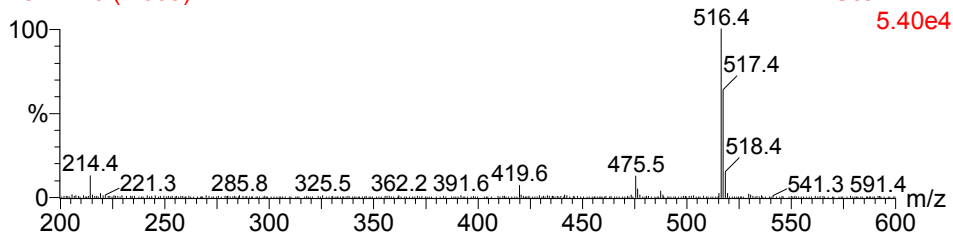

1: Scan AP+

5.40e4

516

7-8-8 340 (5.772)

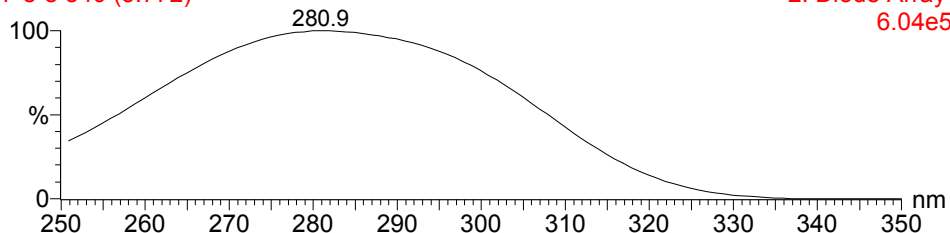

516

2: Diode Array 7-8-8 315 (5.800)

6.04e5

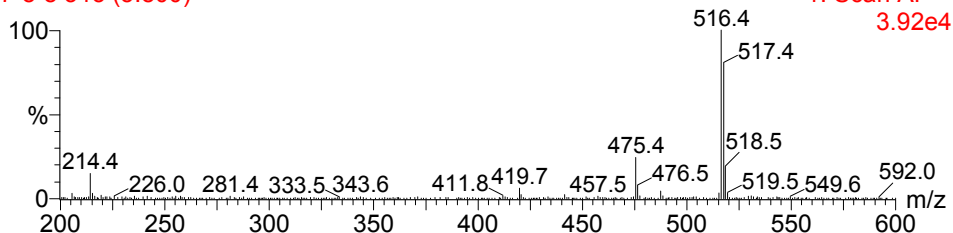

1: Scan AP+

3.92e4

7-8-1

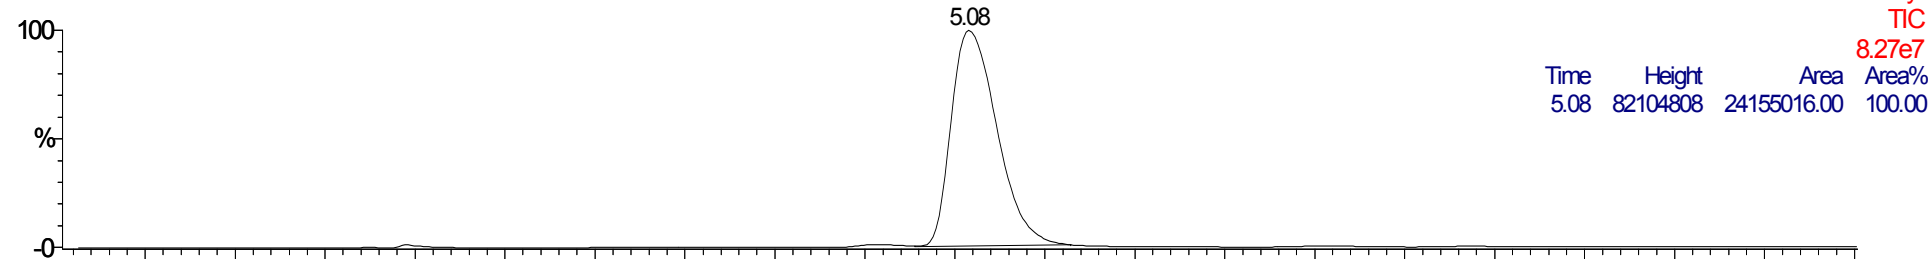

7-8-2

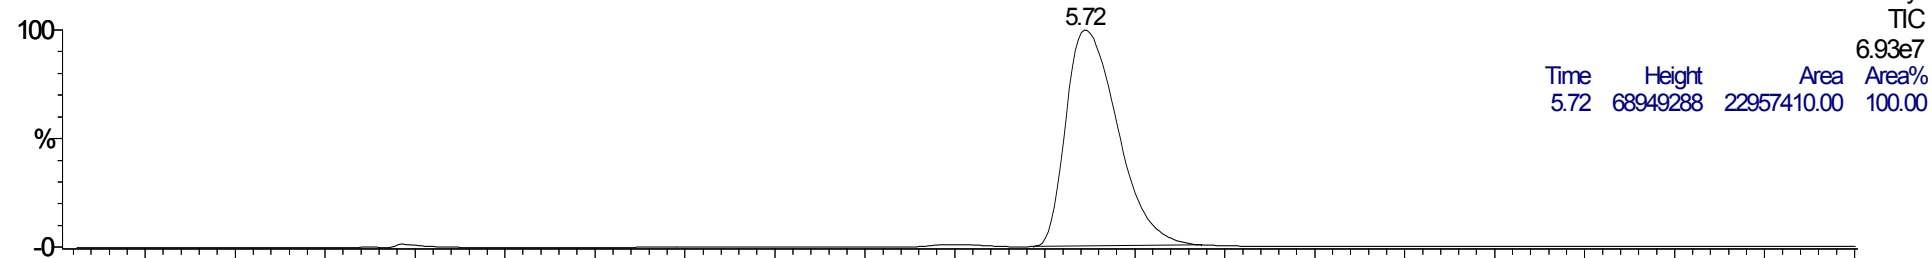

7-8-3

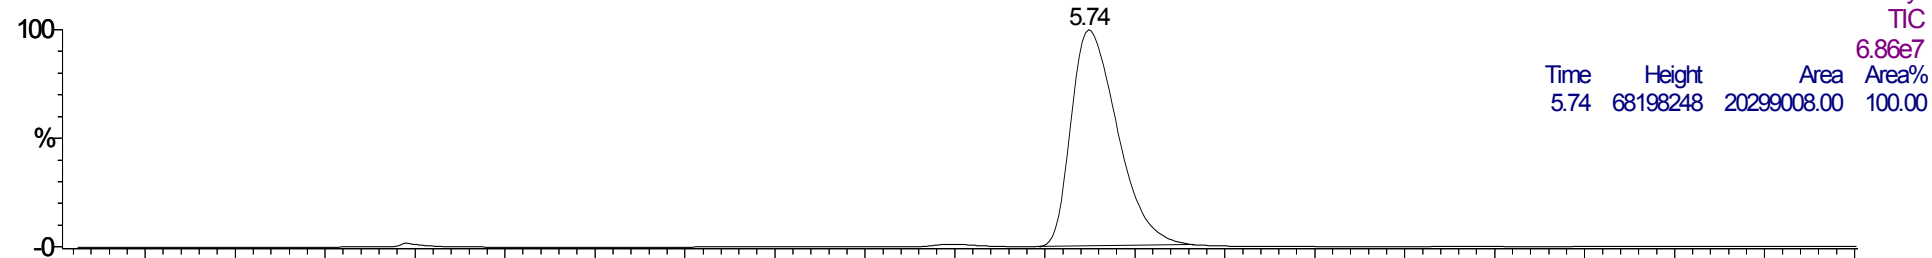

7-8-7

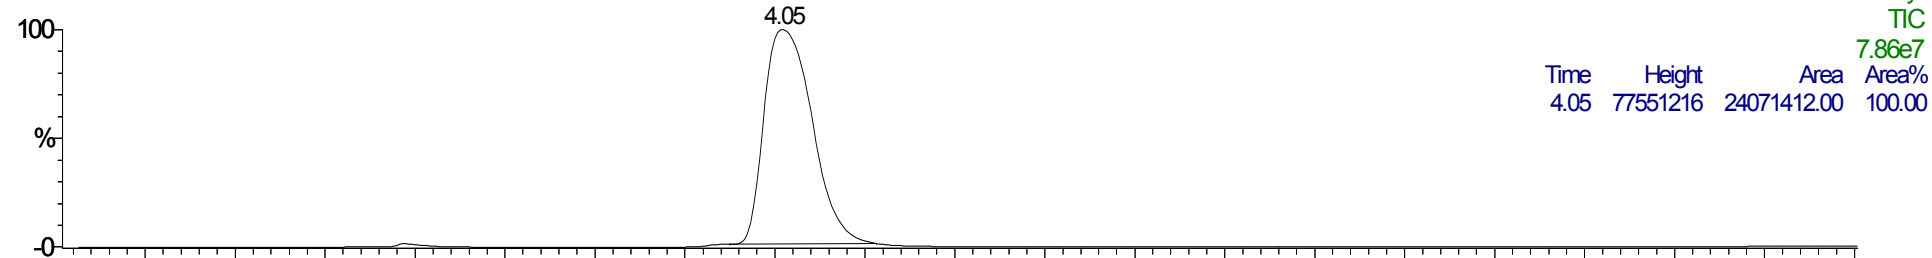

7-8-8

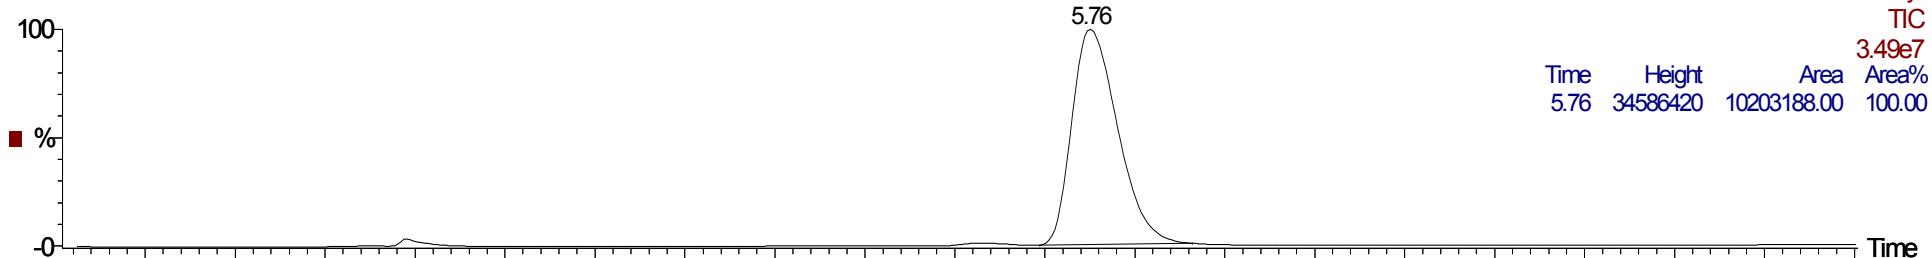

■ %

2: Diode Array  
TIC  
8.27e7

| Time | Height   | Area        | Area%  |
|------|----------|-------------|--------|
| 5.08 | 82104808 | 24155016.00 | 100.00 |

2: Diode Array  
TIC  
6.93e7

| Time | Height   | Area        | Area%  |
|------|----------|-------------|--------|
| 5.72 | 68949288 | 22957410.00 | 100.00 |

2: Diode Array  
TIC  
6.86e7

| Time | Height   | Area        | Area%  |
|------|----------|-------------|--------|
| 5.74 | 68198248 | 20299008.00 | 100.00 |

2: Diode Array  
TIC  
7.86e7

| Time | Height   | Area        | Area%  |
|------|----------|-------------|--------|
| 4.05 | 77551216 | 24071412.00 | 100.00 |

2: Diode Array  
TIC  
3.49e7

| Time | Height   | Area        | Area%  |
|------|----------|-------------|--------|
| 5.76 | 34586420 | 10203188.00 | 100.00 |

Time

516

7-9-1 266 (4.533)

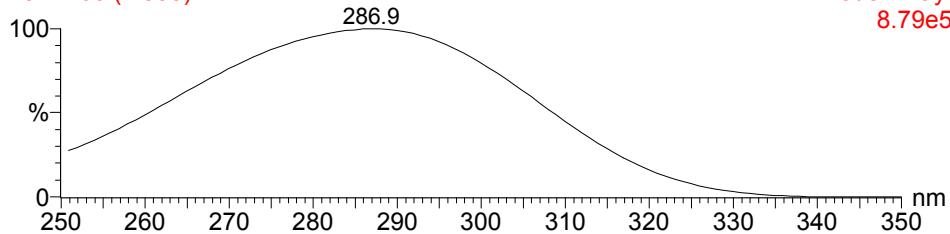

516

2: Diode Array 7-9-1 245 (4.517)

8.79e5

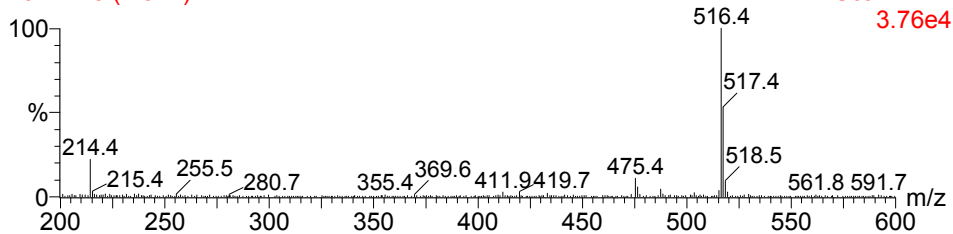

1: Scan AP+

3.76e4

498

7-9-2 291 (4.957)

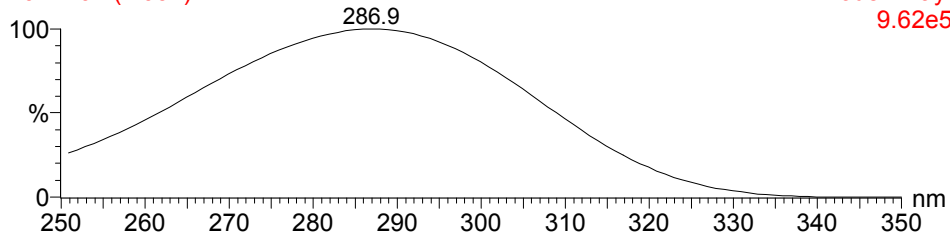

498

2: Diode Array 7-9-2 271 (4.994)

9.62e5

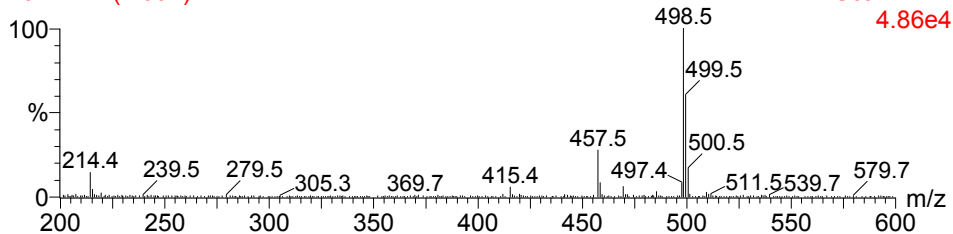

1: Scan AP+

4.86e4

516

7-9-3 288 (4.913)

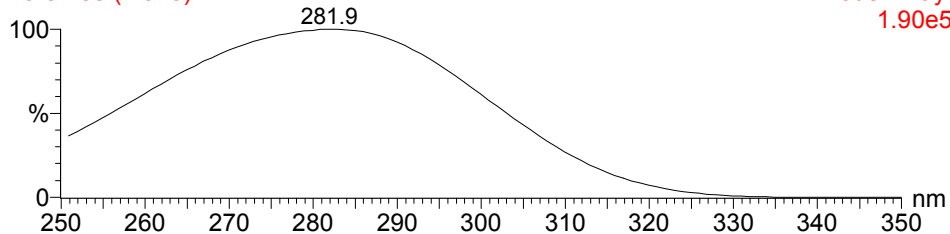

516

2: Diode Array 7-9-3 269 (4.957)

1.90e5

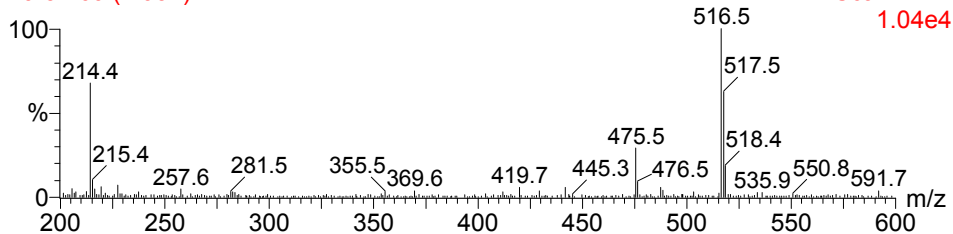

1: Scan AP+

1.04e4

534

7-9-7 218 (3.737)

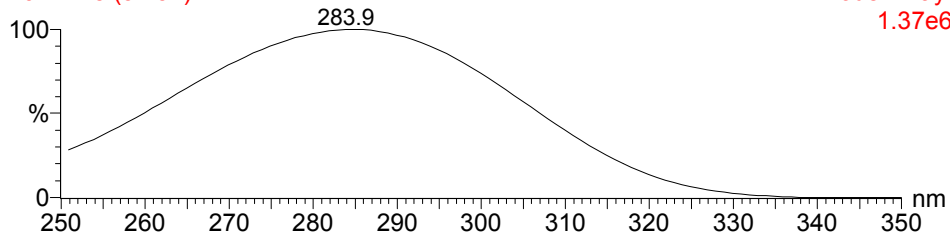

534

2: Diode Array 7-9-7 201 (3.710)

1.37e6

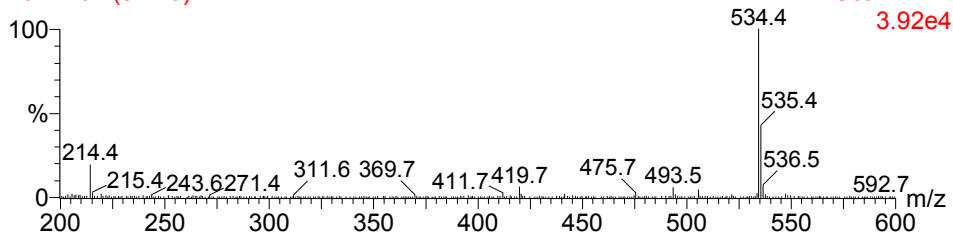

1: Scan AP+

3.92e4

534

7-9-8 297 (5.063)

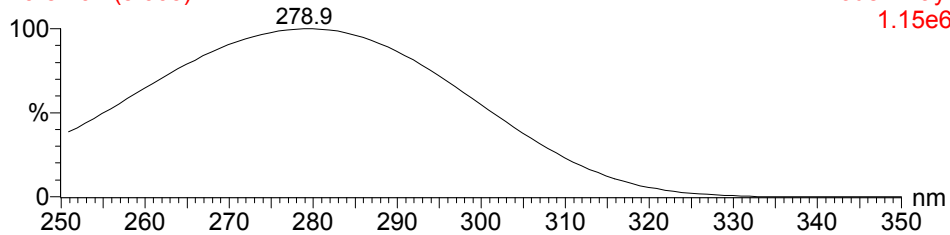

534

2: Diode Array 7-9-8 279 (5.140)

1.15e6

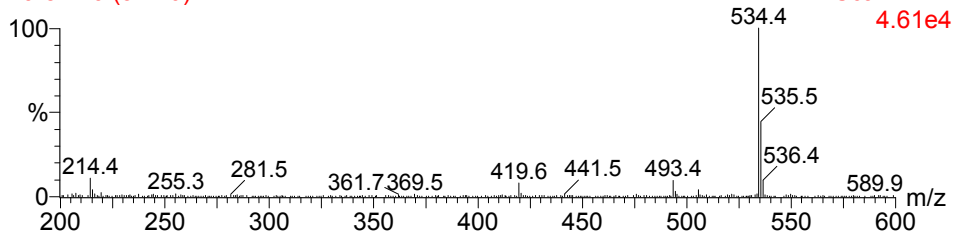

1: Scan AP+

4.61e4

7-9-1

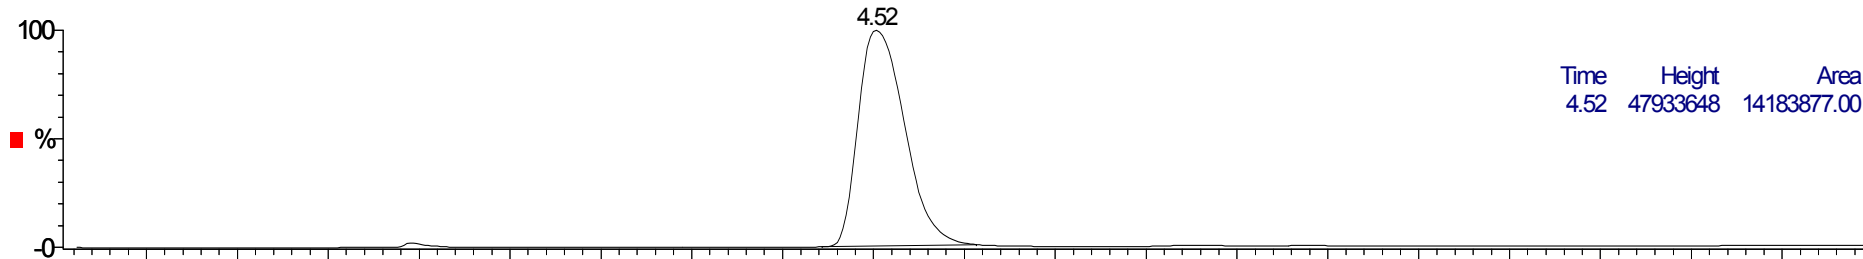

2: Diode Array  
TIC  
4.82e7

| Time | Height   | Area        | Area%  |
|------|----------|-------------|--------|
| 4.52 | 47933648 | 14183877.00 | 100.00 |

7-9-2

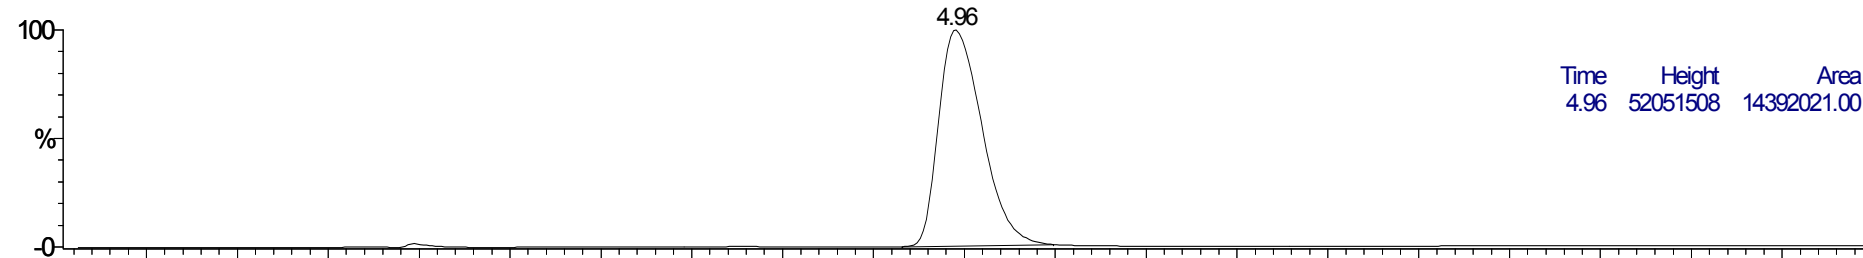

2: Diode Array  
TIC  
5.23e7

| Time | Height   | Area        | Area%  |
|------|----------|-------------|--------|
| 4.96 | 52051508 | 14392021.00 | 100.00 |

7-9-3

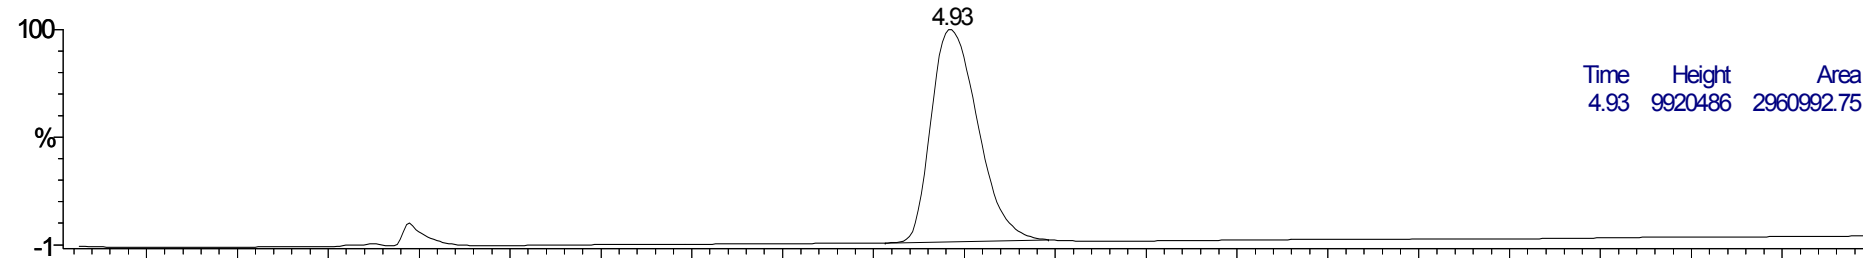

2: Diode Array  
TIC  
1.01e7

| Time | Height  | Area       | Area%  |
|------|---------|------------|--------|
| 4.93 | 9920486 | 2960992.75 | 100.00 |

7-9-7

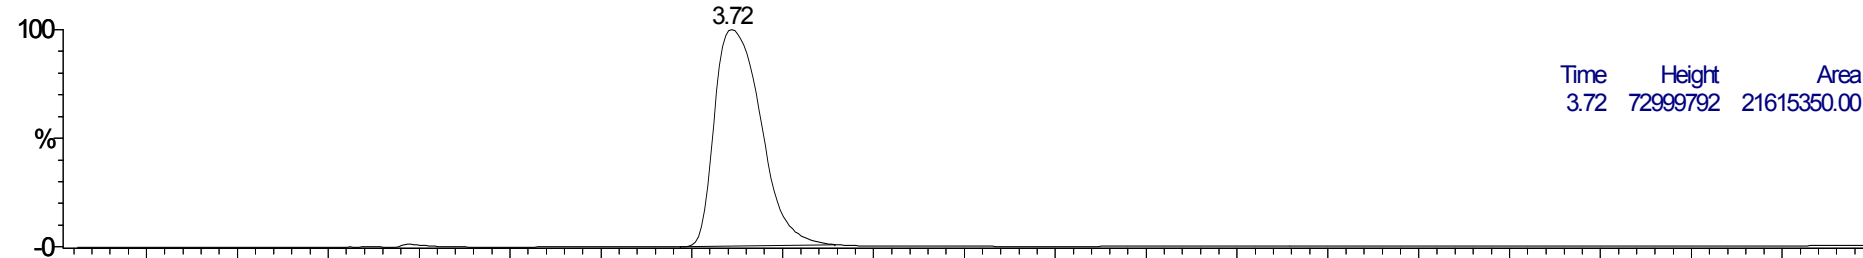

2: Diode Array  
TIC  
7.33e7

| Time | Height   | Area        | Area%  |
|------|----------|-------------|--------|
| 3.72 | 72999792 | 21615350.00 | 100.00 |

7-9-8

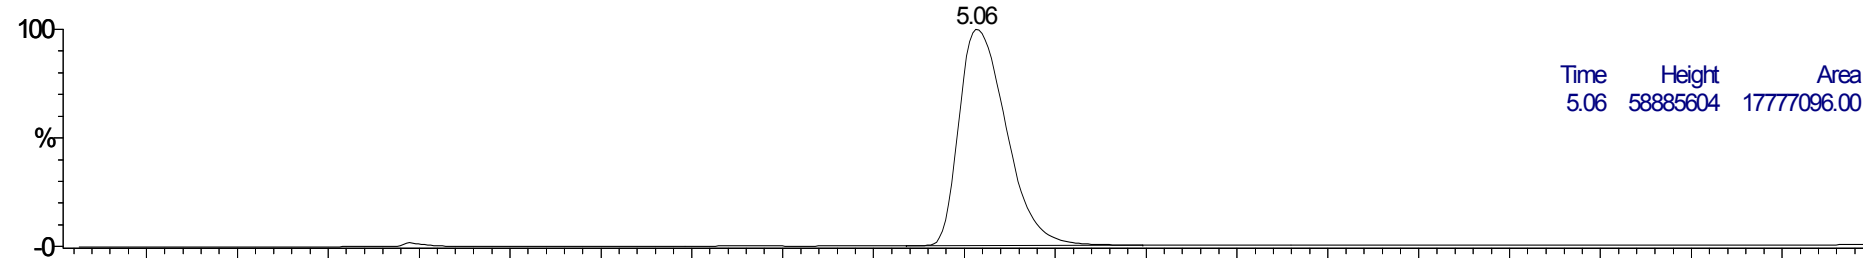

2: Diode Array  
TIC  
5.91e7

| Time | Height   | Area        | Area%  |
|------|----------|-------------|--------|
| 5.06 | 58885604 | 17777096.00 | 100.00 |

Time

1.00 2.00 3.00 4.00 5.00 6.00 7.00 8.00 9.00 10.00

498

7-10-1 276 (4.702)

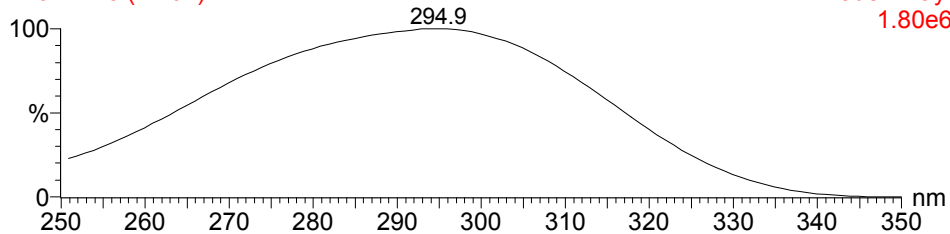

498

2: Diode Array 7-10-1 256 (4.719)

1.80e6

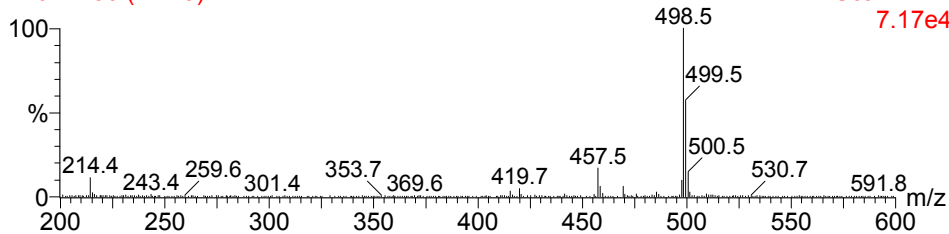

1: Scan AP+

7.17e4

480

7-10-2 321 (5.460)

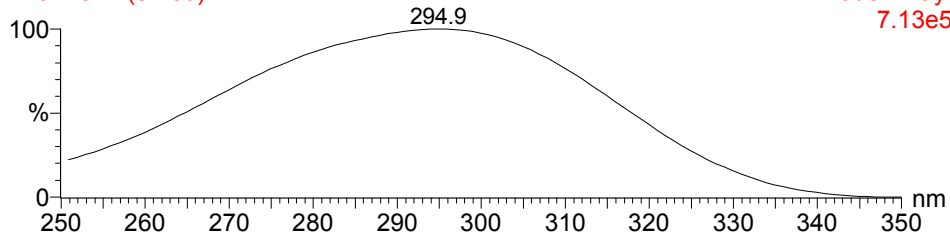

480

2: Diode Array 7-10-2 298 (5.489)

7.13e5

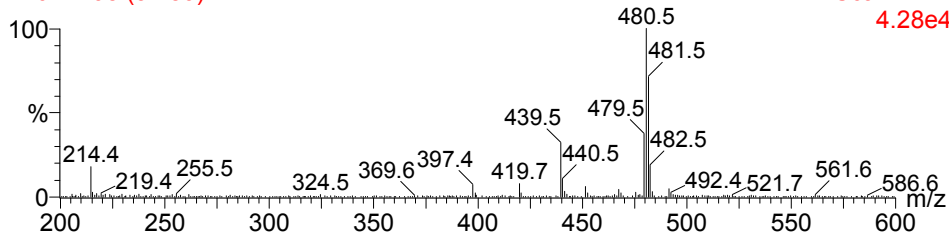

1: Scan AP+

4.28e4

498

7-10-3 326 (5.548)

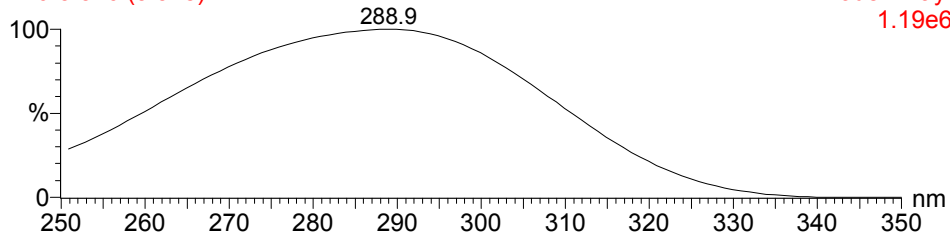

498

2: Diode Array 7-10-3 304 (5.599)

1.19e6

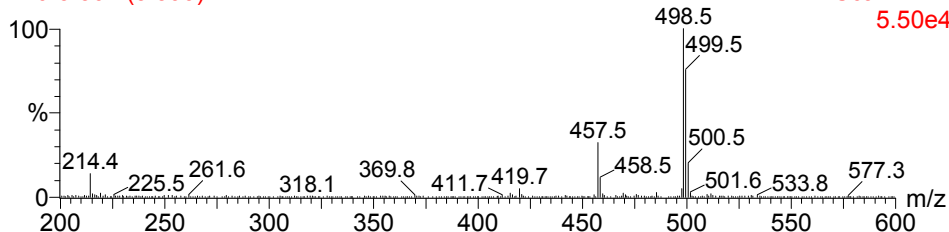

1: Scan AP+

5.50e4

516

7-10-7 219 (3.753)

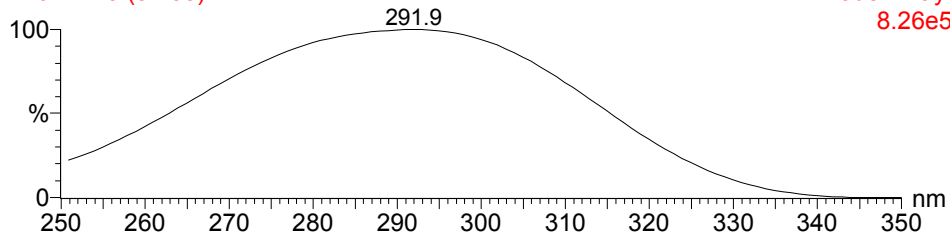

516

2: Diode Array 7-10-7 202 (3.729)

8.26e5

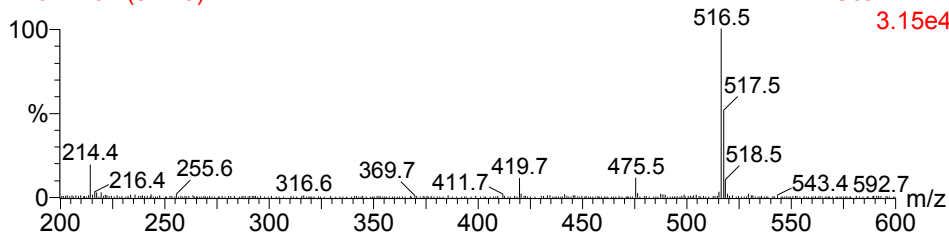

1: Scan AP+

3.15e4

516

7-10-8 316 (5.377)

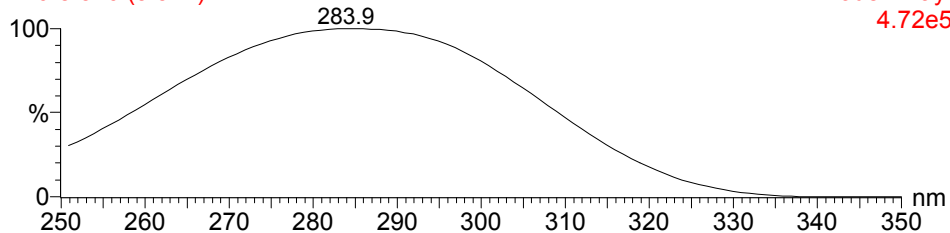

516

2: Diode Array 7-10-8 296 (5.452)

4.72e5

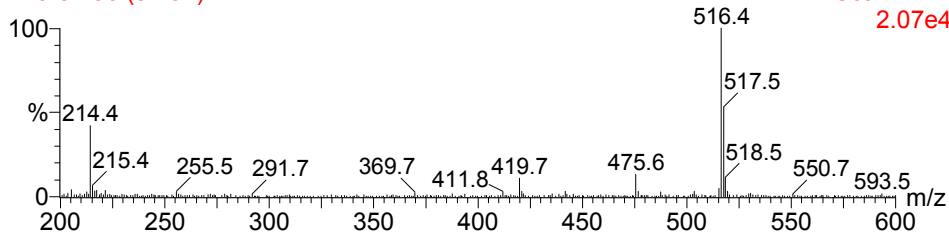

1: Scan AP+

2.07e4

7-10-1

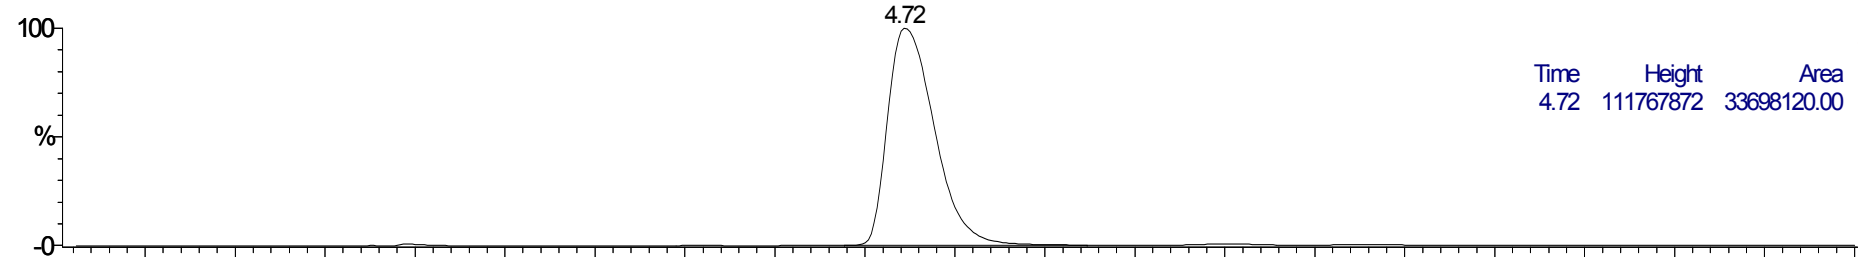

2: Diode Array  
TIC  
1.12e8

| Time | Height    | Area        | Area%  |
|------|-----------|-------------|--------|
| 4.72 | 111767872 | 33698120.00 | 100.00 |

7-10-2

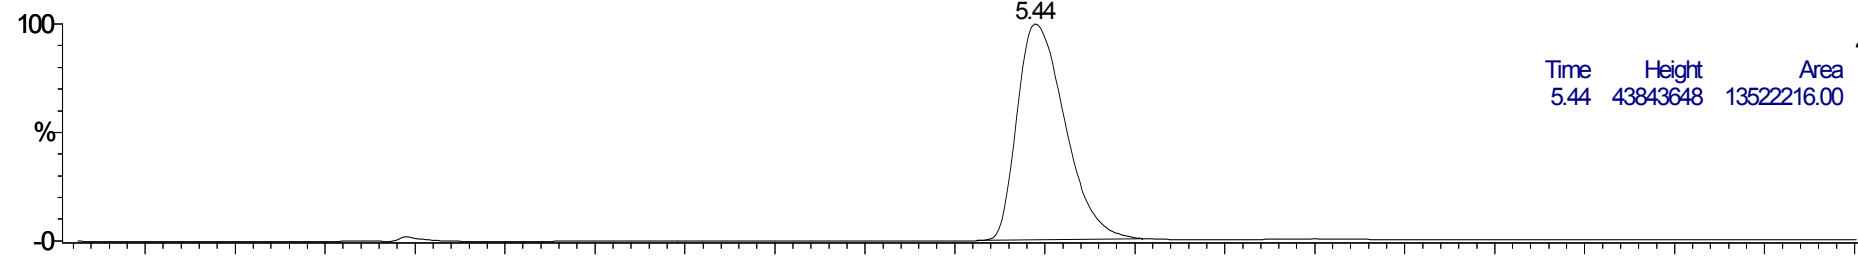

2: Diode Array  
TIC  
4.40e7

| Time | Height   | Area        | Area%  |
|------|----------|-------------|--------|
| 5.44 | 43843648 | 13522216.00 | 100.00 |

7-10-3

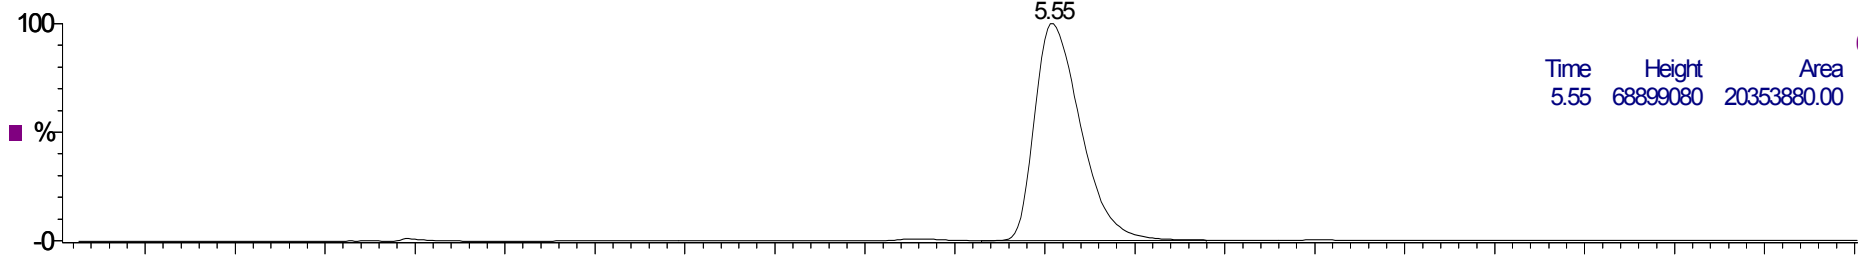

2: Diode Array  
TIC  
6.90e7

| Time | Height   | Area        | Area%  |
|------|----------|-------------|--------|
| 5.55 | 68899080 | 20353880.00 | 100.00 |

7-10-7

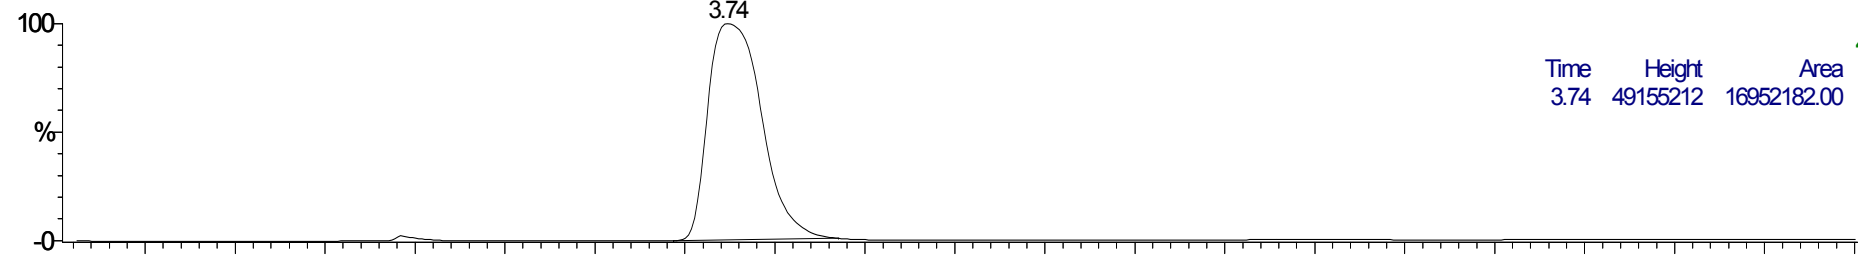

2: Diode Array  
TIC  
4.93e7

| Time | Height   | Area        | Area%  |
|------|----------|-------------|--------|
| 3.74 | 49155212 | 16952182.00 | 100.00 |

7-10-8

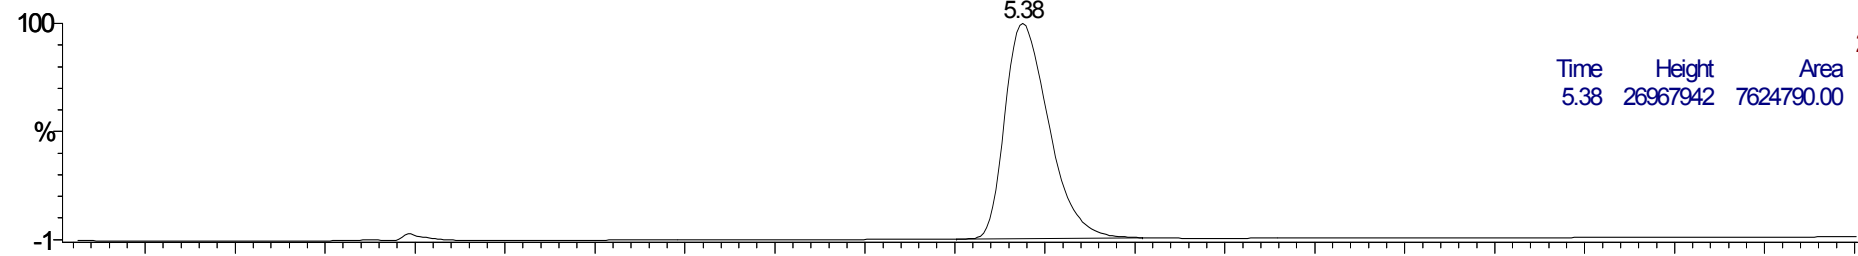

2: Diode Array  
TIC  
2.71e7

| Time | Height   | Area       | Area%  |
|------|----------|------------|--------|
| 5.38 | 26967942 | 7624790.00 | 100.00 |

Time



480

7-11-1 312 (5.308)

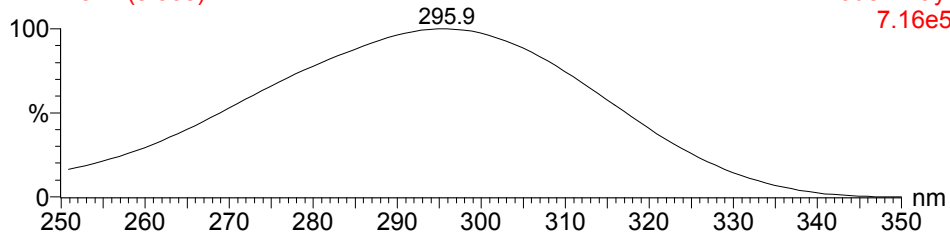

2: Diode Array 7-11-1 288 (5.305)

7.16e5

480

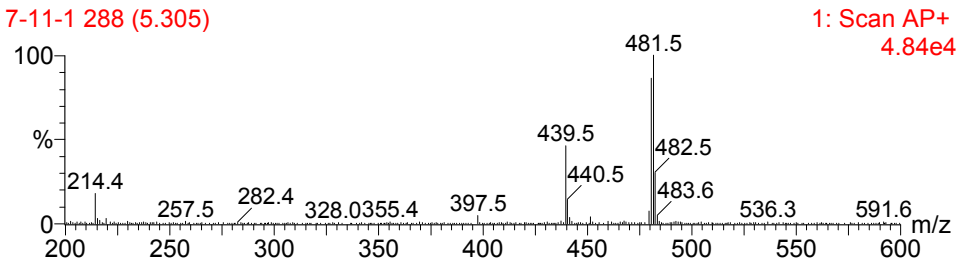

1: Scan AP+

4.84e4

462

7-11-2 373 (6.325)

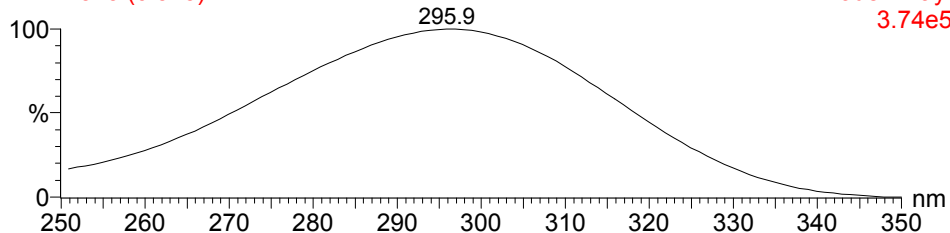

2: Diode Array 7-11-2 346 (6.369)

3.74e5

462

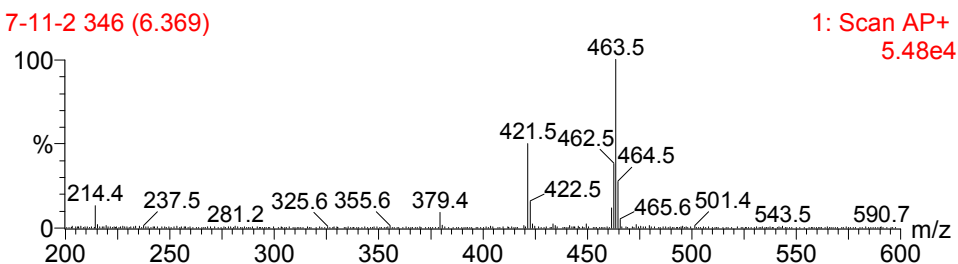

1: Scan AP+

5.48e4

480

7-11-3 322 (5.467)

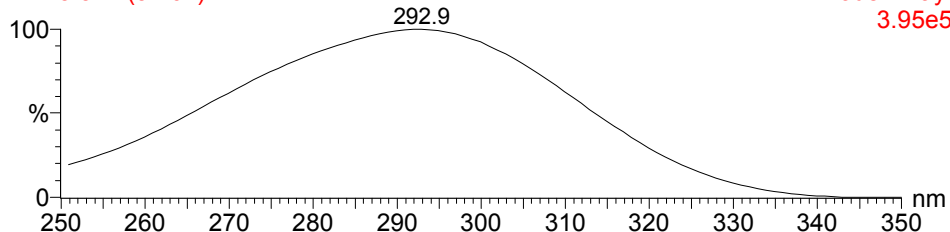

2: Diode Array 7-11-3 297 (5.470)

3.95e5

480

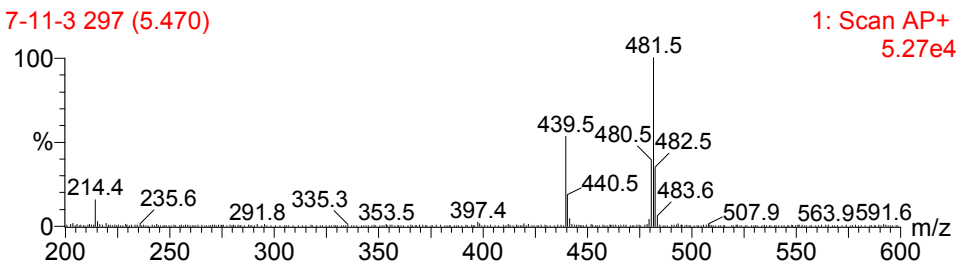

1: Scan AP+

5.27e4

498

7-11-7 239 (4.097)

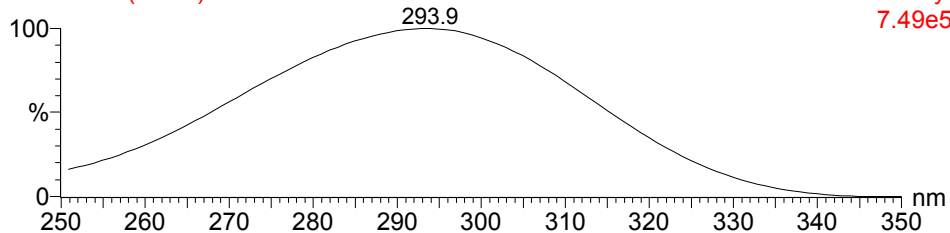

2: Diode Array 7-11-7 225 (4.150)

7.49e5

498

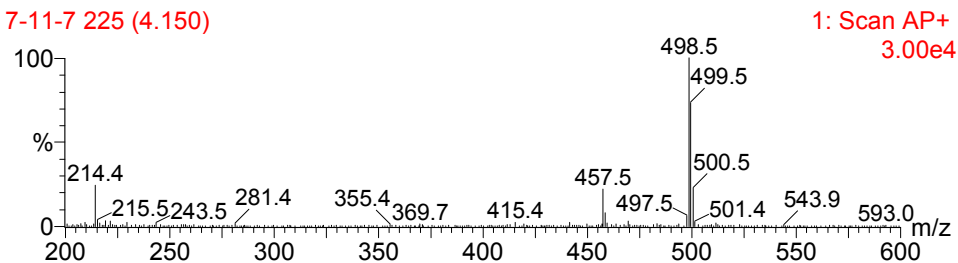

1: Scan AP+

3.00e4

498

7-11-8 317 (5.387)

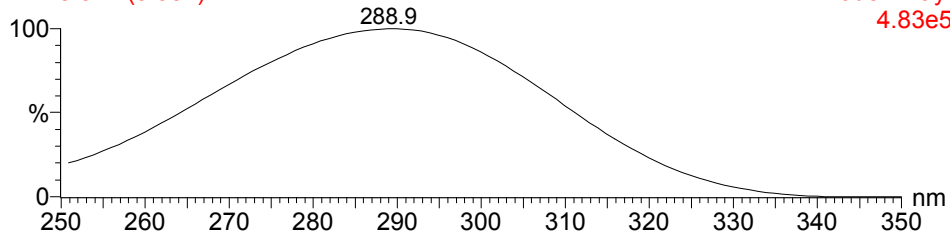

2: Diode Array 7-11-8 293 (5.397)

4.83e5

498

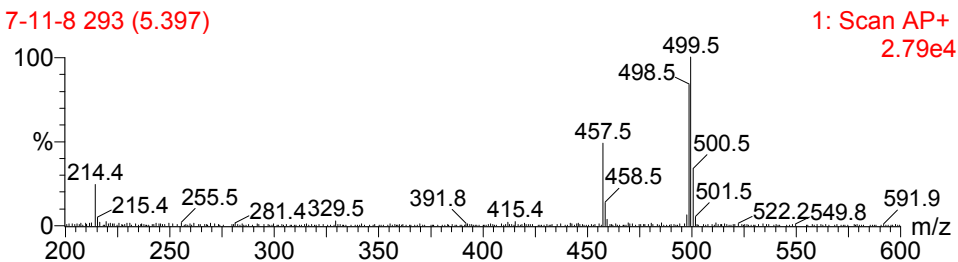

1: Scan AP+

2.79e4

7-11-1

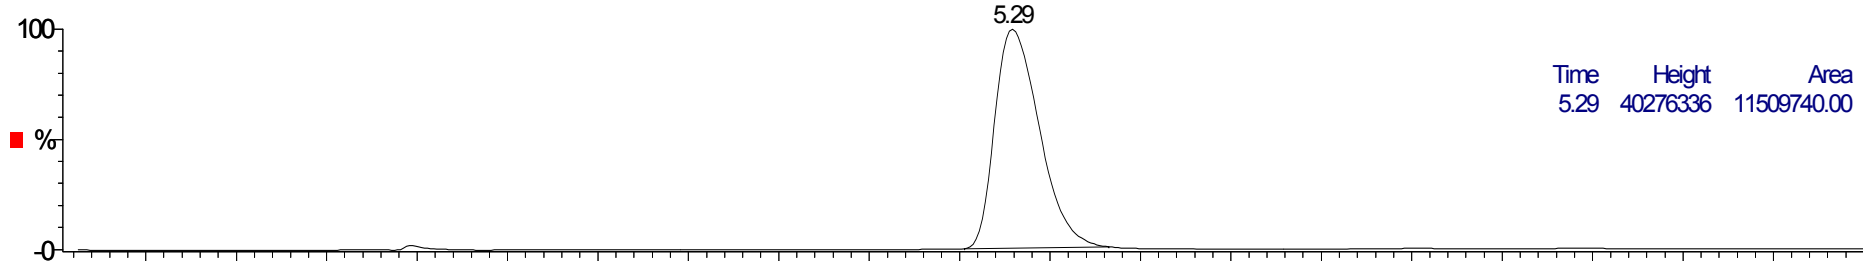

2: Diode Array  
TIC  
4.06e7

| Time | Height   | Area        | Area%  |
|------|----------|-------------|--------|
| 5.29 | 40276336 | 11509740.00 | 100.00 |

7-11-2

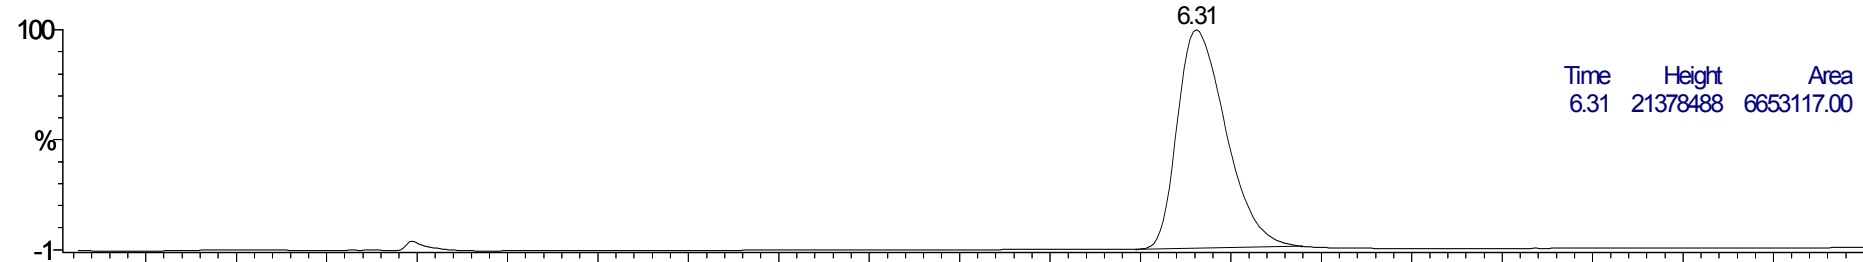

2: Diode Array  
TIC  
2.15e7

| Time | Height   | Area       | Area%  |
|------|----------|------------|--------|
| 6.31 | 21378488 | 6653117.00 | 100.00 |

7-11-3

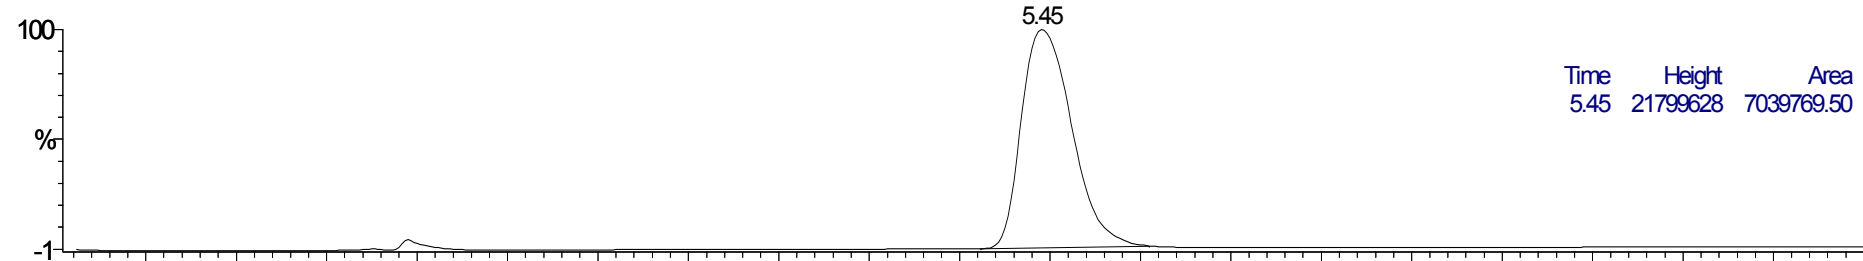

2: Diode Array  
TIC  
2.19e7

| Time | Height   | Area       | Area%  |
|------|----------|------------|--------|
| 5.45 | 21799628 | 7039769.50 | 100.00 |

7-11-7

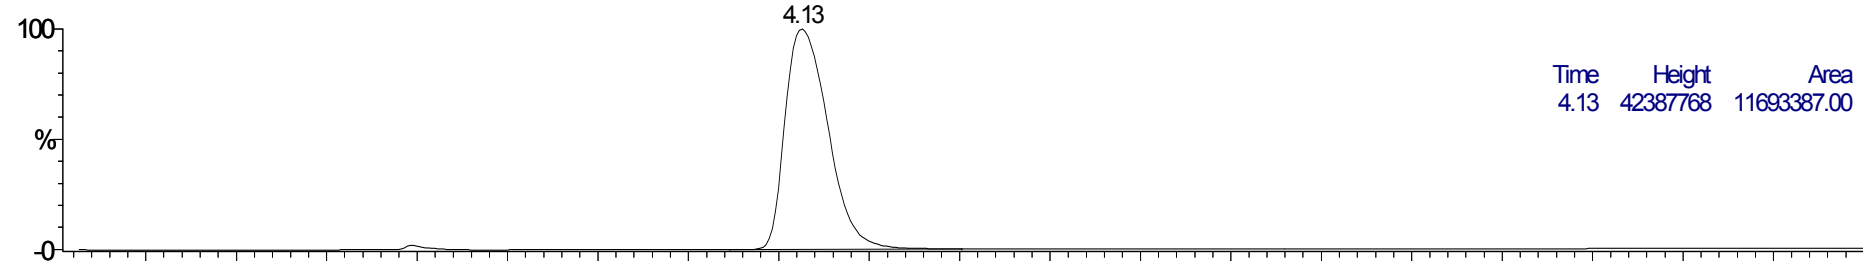

2: Diode Array  
TIC  
4.24e7

| Time | Height   | Area        | Area%  |
|------|----------|-------------|--------|
| 4.13 | 42387768 | 11693387.00 | 100.00 |

7-11-8

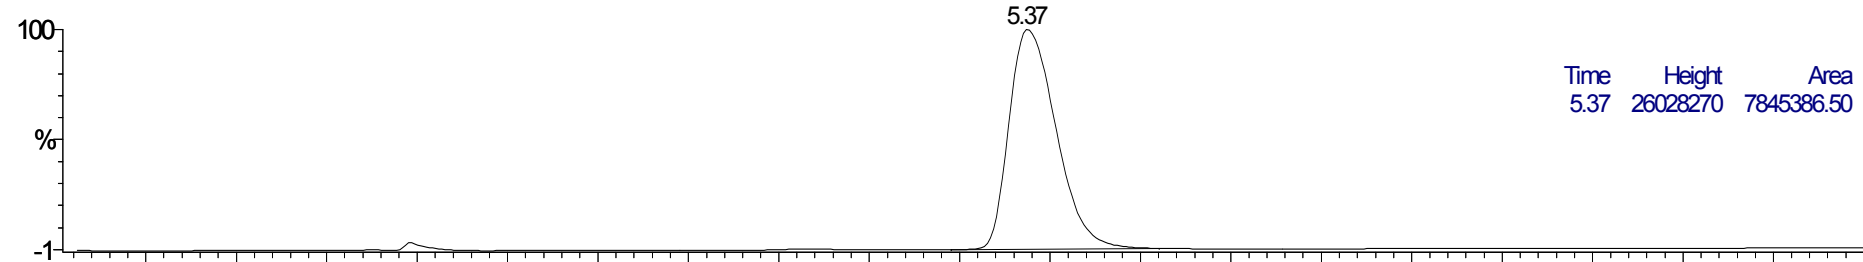

2: Diode Array  
TIC  
2.61e7

| Time | Height   | Area       | Area%  |
|------|----------|------------|--------|
| 5.37 | 26028270 | 7845386.50 | 100.00 |

498

811-99 789 (13.272)

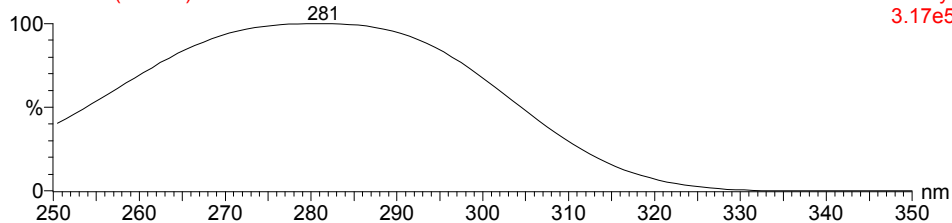

498

2: Diode Array 811-99 722 (13.273)

3.17e5

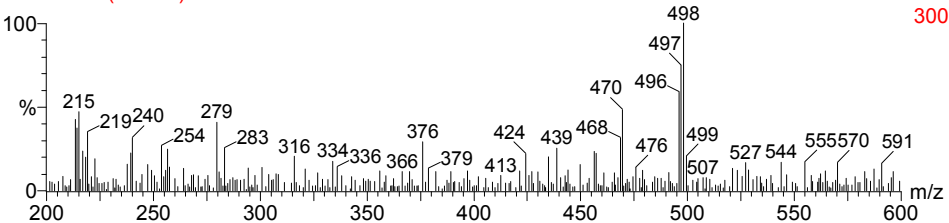

1: Scan AP+ 300

480

812-2 960 (16.117)

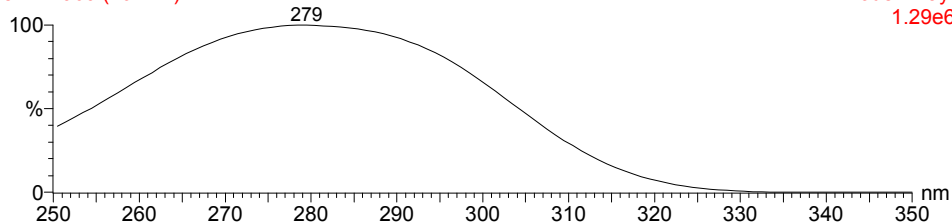

480

2: Diode Array 812-2 878 (16.129)

1.29e6

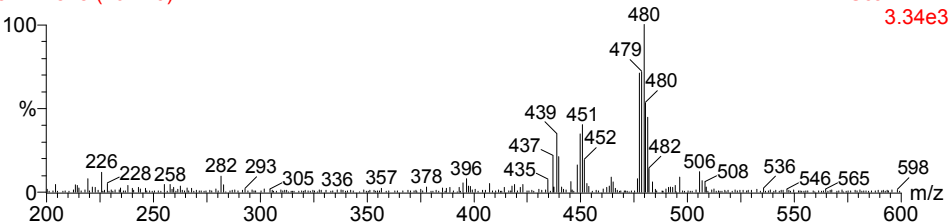

1: Scan AP+ 3.34e3

498

813-99 976 (16.378)

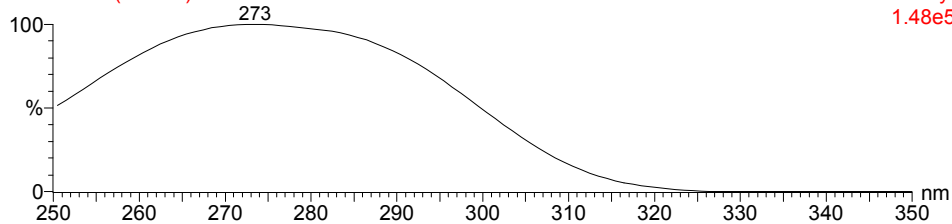

498

2: Diode Array 813-99 896 (16.456)

1.48e5

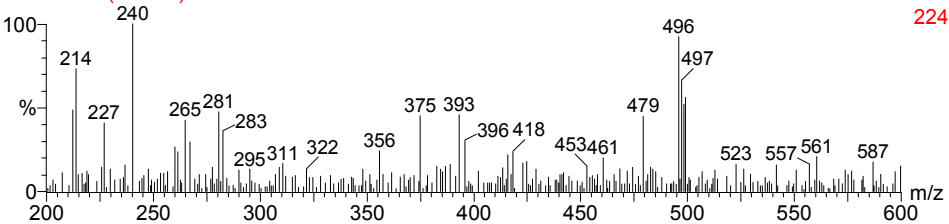

1: Scan AP+ 224

516

817-2 612 (10.320)

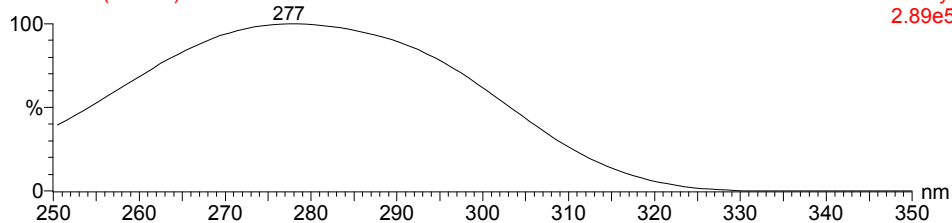

516

2: Diode Array 817-2 563 (10.357)

2.89e5

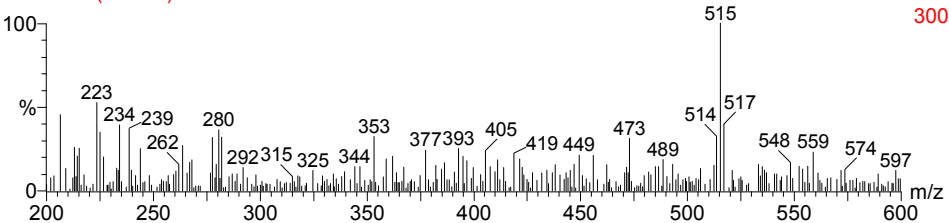

1: Scan AP+ 300

516

818-99 916 (15.387)

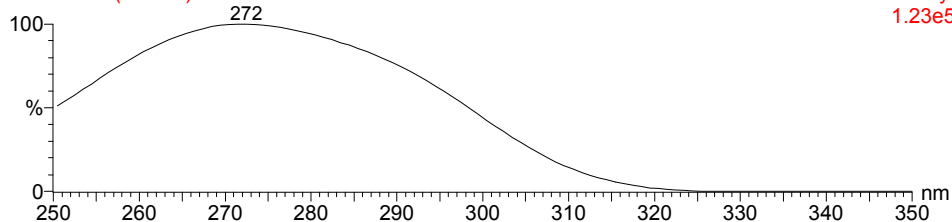

516

2: Diode Array 818-99 841 (15.447)

1.23e5

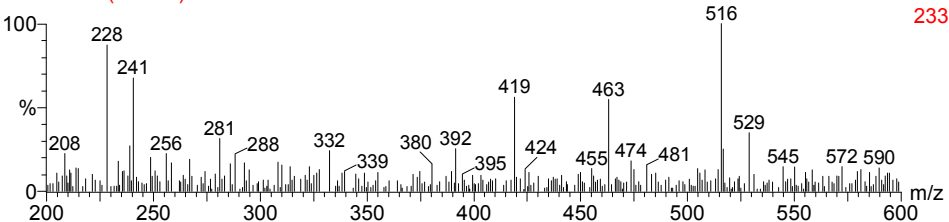

1: Scan AP+ 233

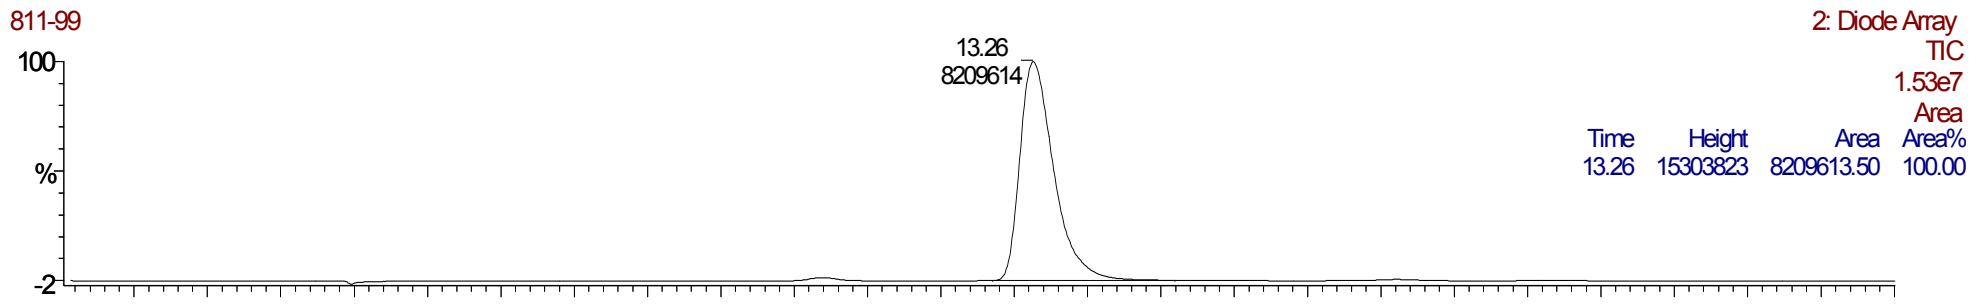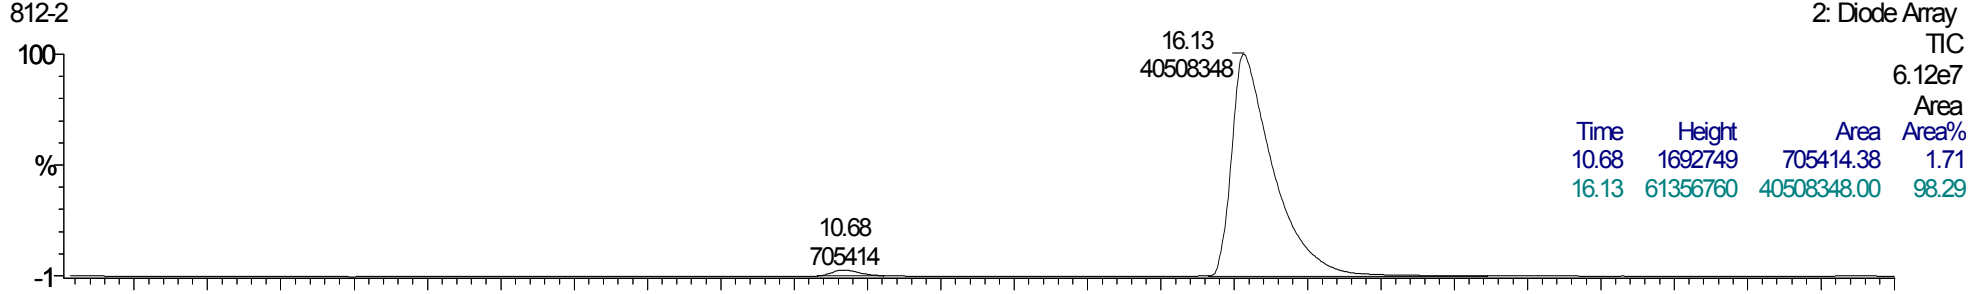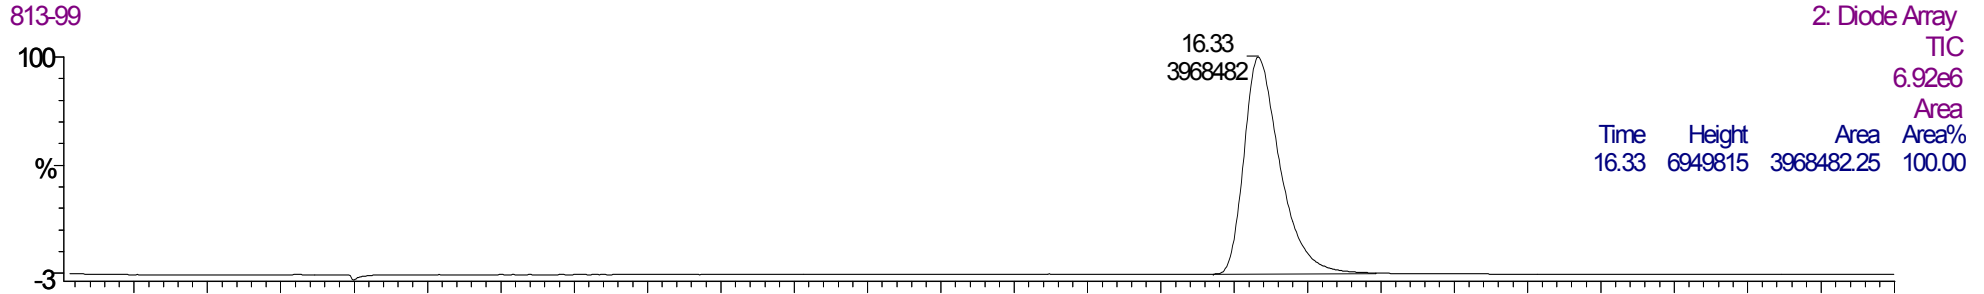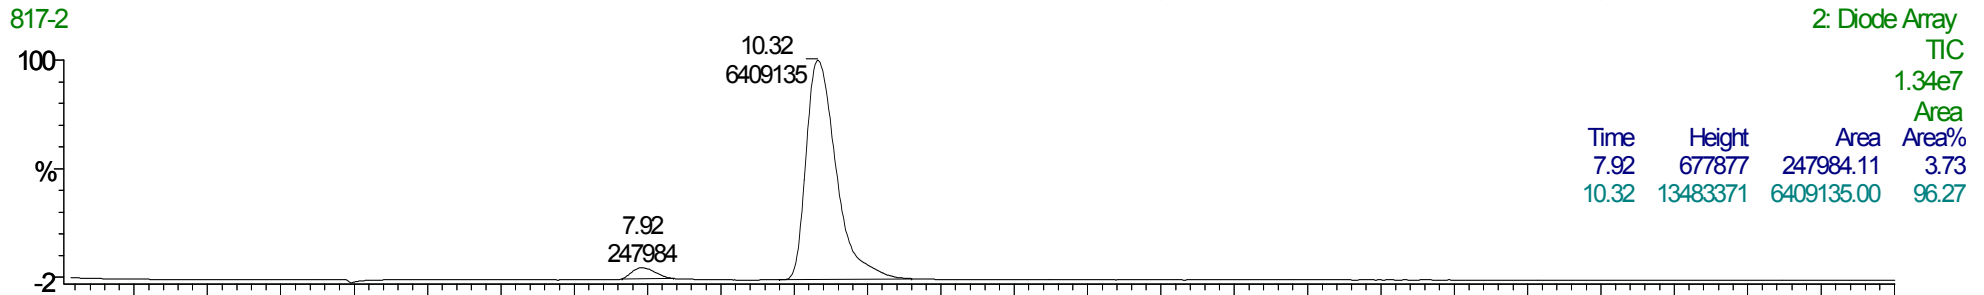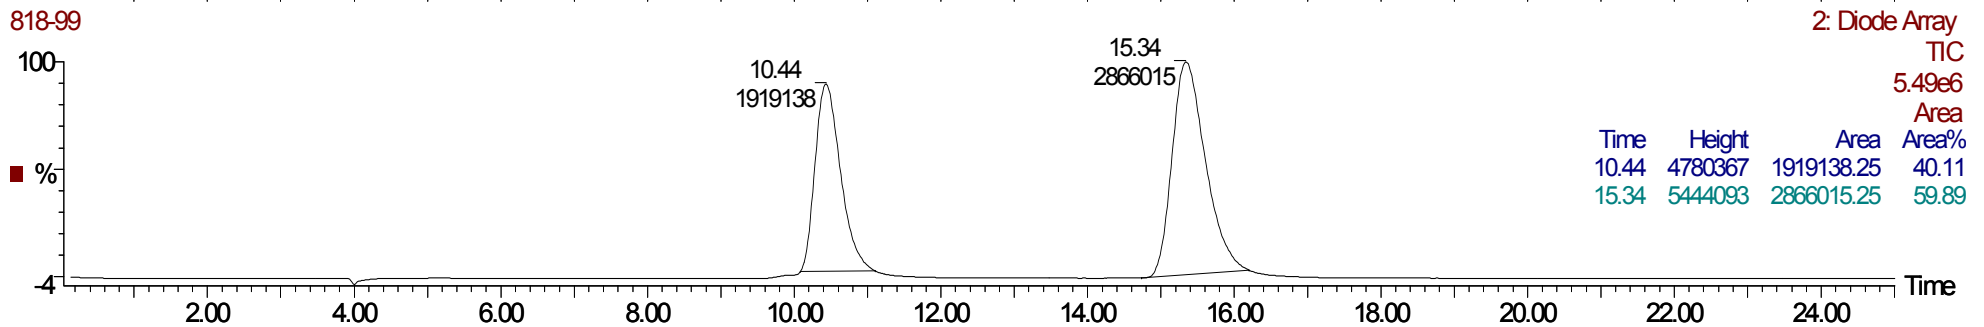

480

821-99 888 (14.915)

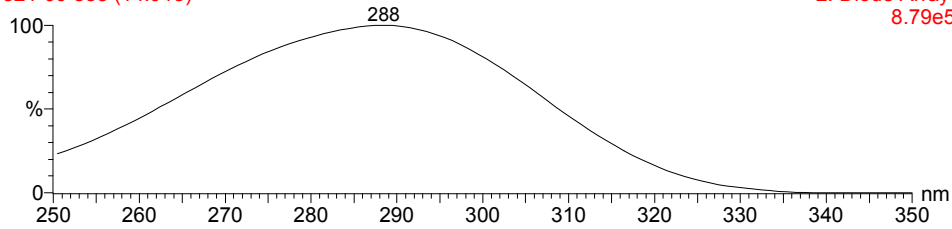

2: Diode Array 8.79e5

480

821-99 823 (15.117)

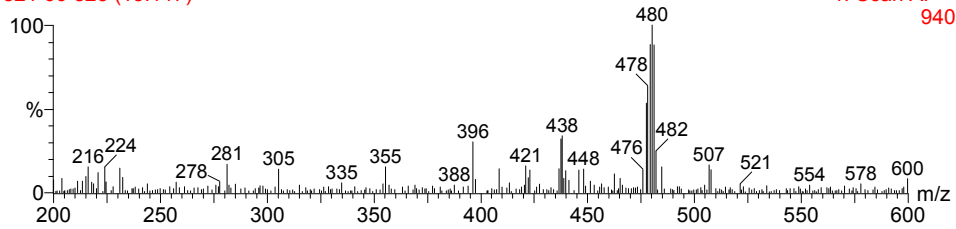

1: Scan AP+ 940

462

822-99 1056 (17.718)

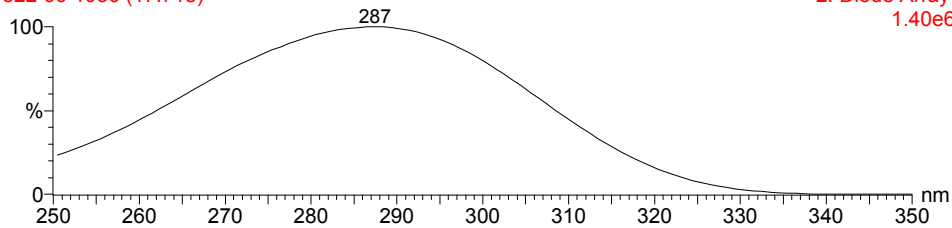

2: Diode Array 1.40e6

480

823-99 982 (18.033)

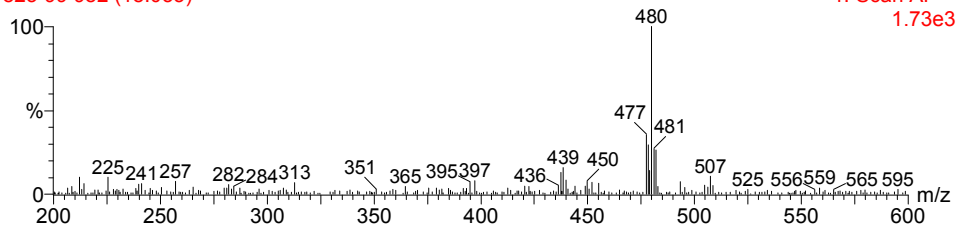

1: Scan AP+ 1.73e3

480

823-99 1072 (17.990)

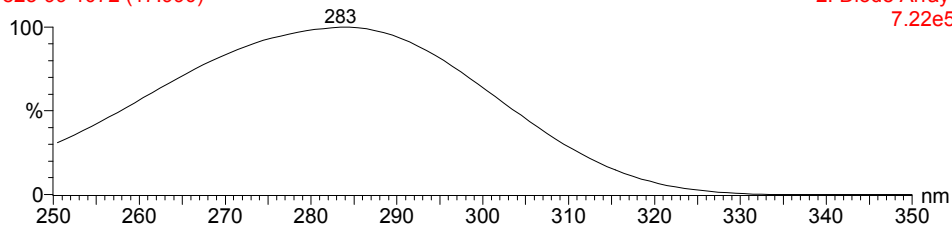

2: Diode Array 7.22e5

480

823-99 996 (18.289)

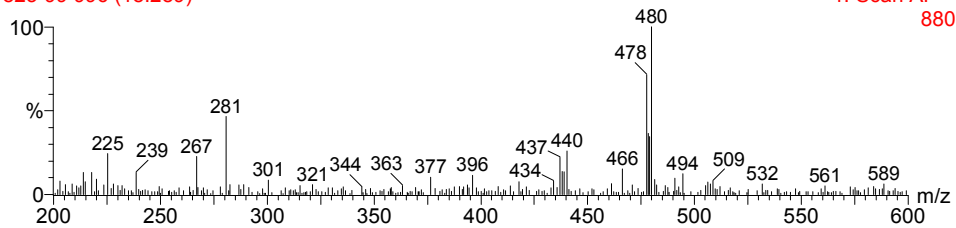

1: Scan AP+ 880

498

827-99 668 (11.247)

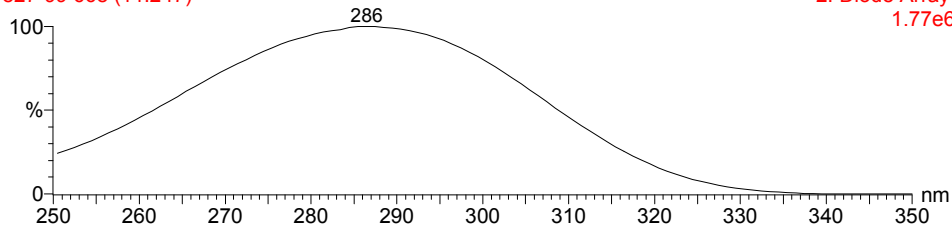

2: Diode Array 1.77e6

498

827-99 607 (11.156)

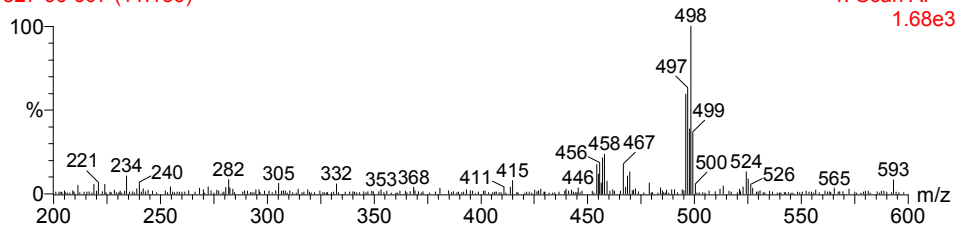

1: Scan AP+ 1.68e3

498

828-99 1000 (16.782)

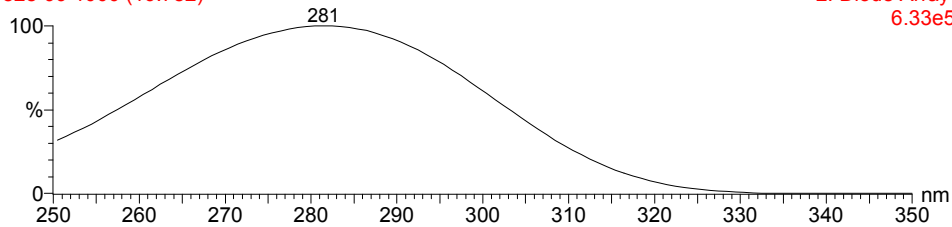

2: Diode Array 6.33e5

498

828-99 921 (16.914)

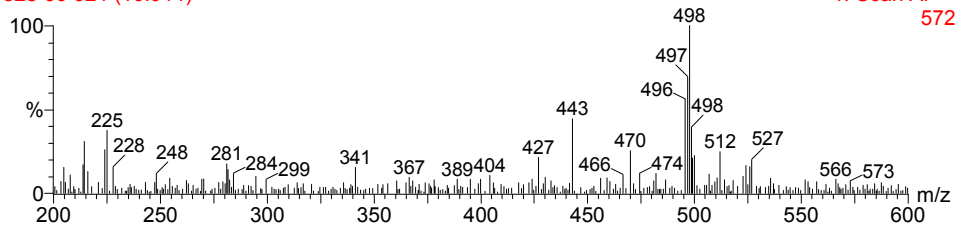

1: Scan AP+ 572

821-99

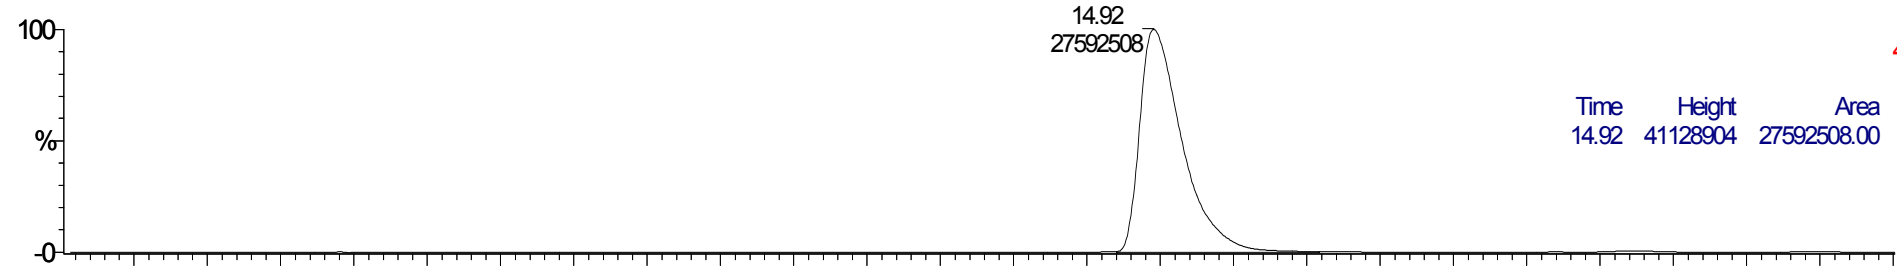

2: Diode Array  
TIC  
4.11e7  
Area

| Time  | Height   | Area        | Area%  |
|-------|----------|-------------|--------|
| 14.92 | 41128904 | 27592508.00 | 100.00 |

822-99

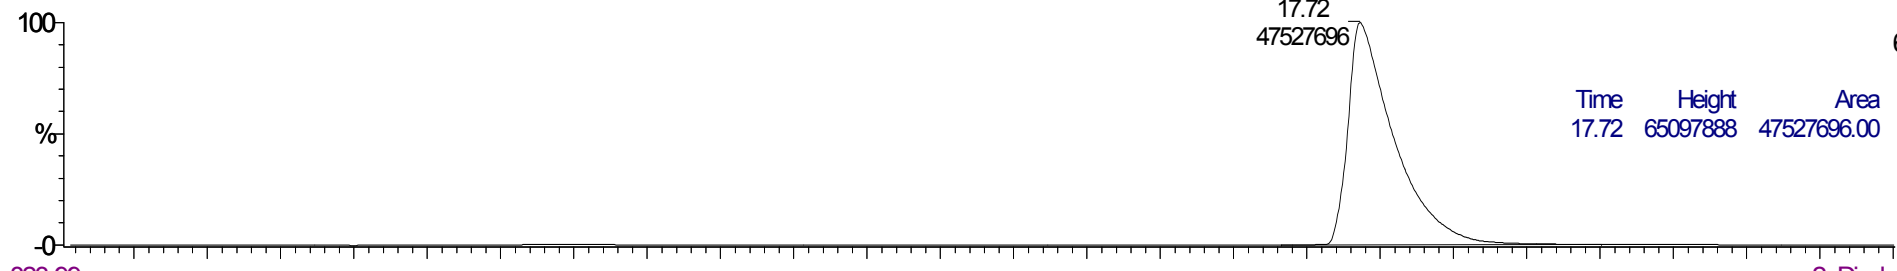

2: Diode Array  
TIC  
6.51e7  
Area

| Time  | Height   | Area        | Area%  |
|-------|----------|-------------|--------|
| 17.72 | 65097888 | 47527696.00 | 100.00 |

823-99

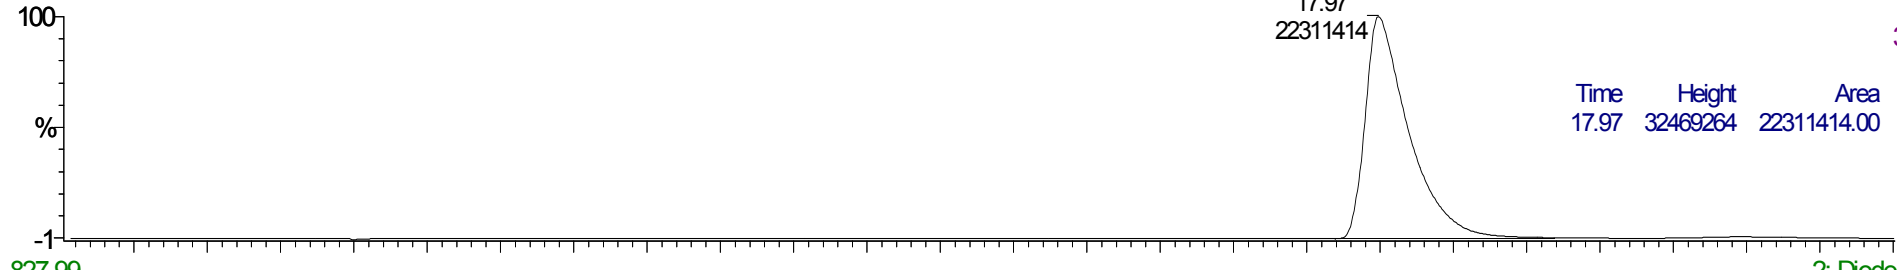

2: Diode Array  
TIC  
3.24e7  
Area

| Time  | Height   | Area        | Area%  |
|-------|----------|-------------|--------|
| 17.97 | 32469264 | 22311414.00 | 100.00 |

827-99

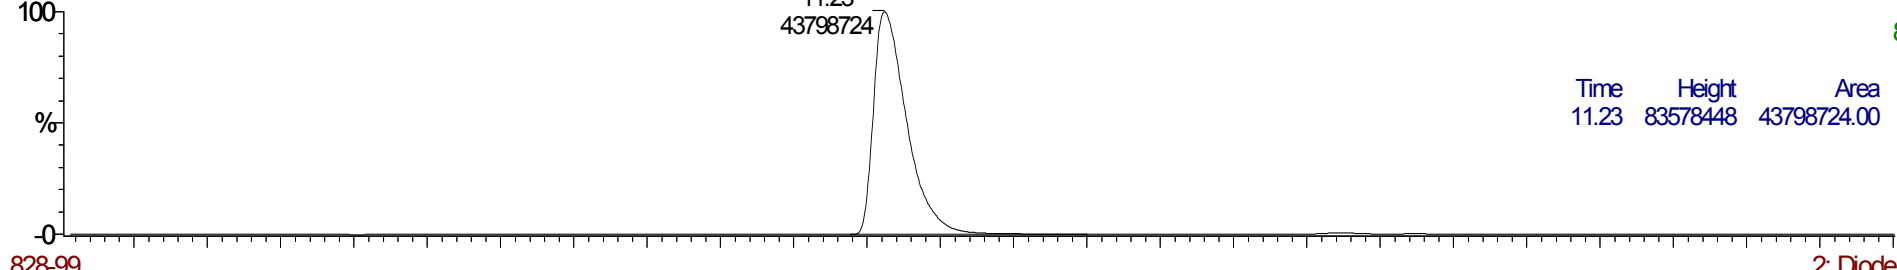

2: Diode Array  
TIC  
8.36e7  
Area

| Time  | Height   | Area        | Area%  |
|-------|----------|-------------|--------|
| 11.23 | 83578448 | 43798724.00 | 100.00 |

828-99

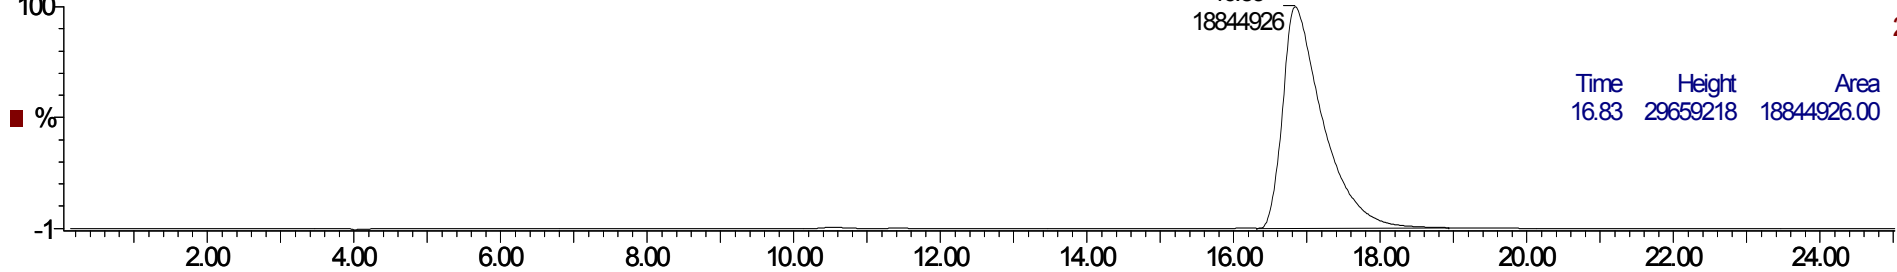

2: Diode Array  
TIC  
2.97e7  
Area

| Time  | Height   | Area        | Area%  |
|-------|----------|-------------|--------|
| 16.83 | 29659218 | 18844926.00 | 100.00 |

■

Time

462

7-3-7 309 (5.258)

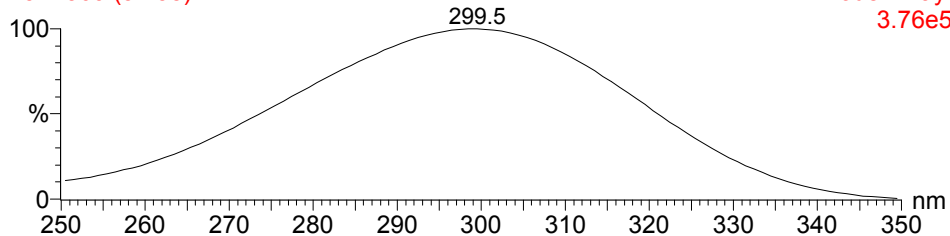

462

2: Diode Array 7-3-7 286 (5.269)

3.76e5

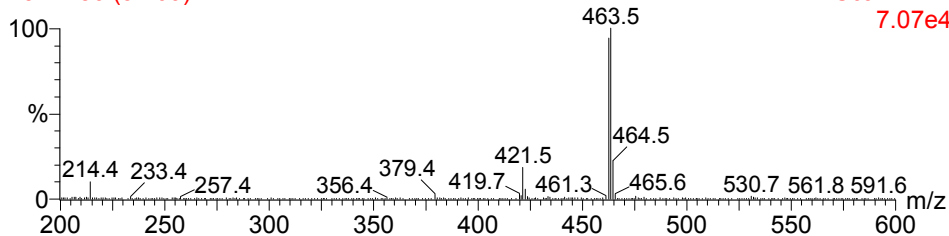

1: Scan AP+

7.07e4

462

7-3-8 439 (7.428)

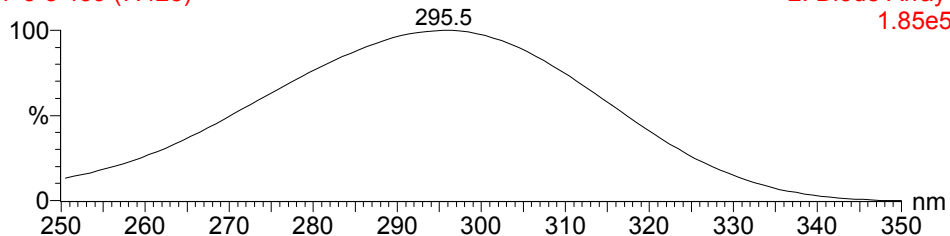

462

2: Diode Array 7-3-8 405 (7.451)

1.85e5

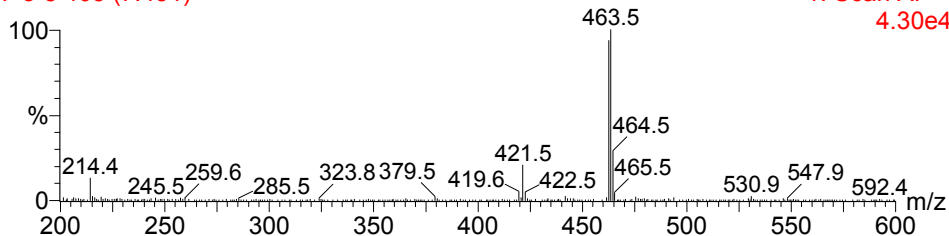

1: Scan AP+

4.30e4

444

8-3-1 638 (10.743)

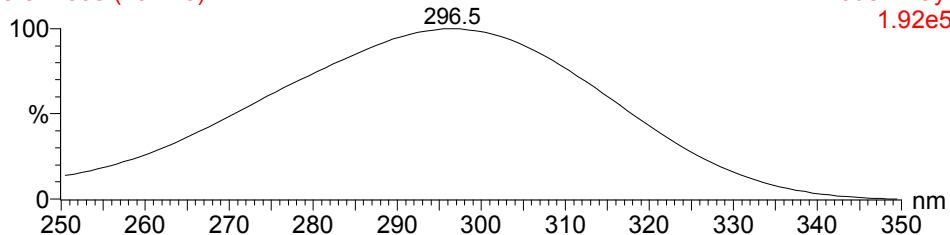

444

2: Diode Array 8-3-1 586 (10.769)

1.92e5

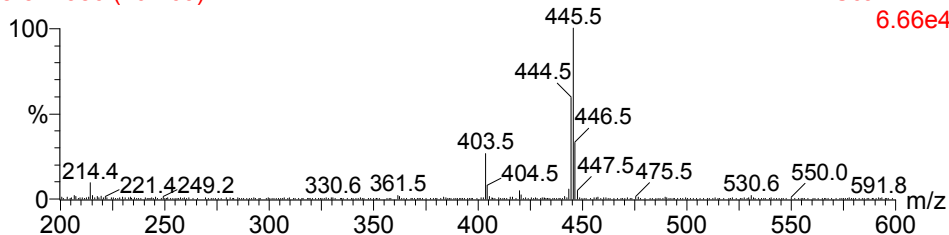

1: Scan AP+

6.66e4

426

8-3-2 845 (14.190)

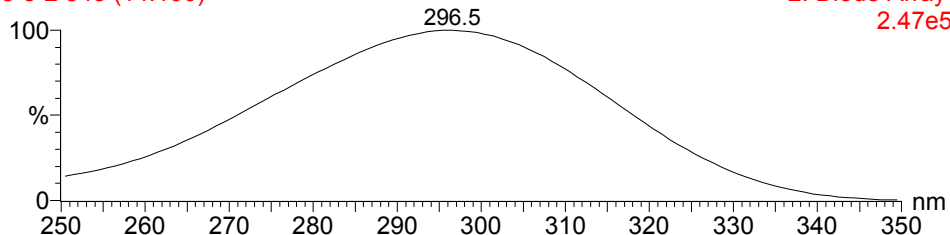

426

2: Diode Array 8-3-2 773 (14.197)

2.47e5

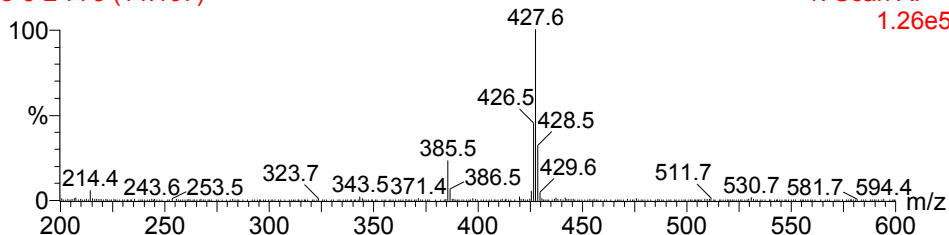

1: Scan AP+

1.26e5

462

8-3-8 637 (10.717)

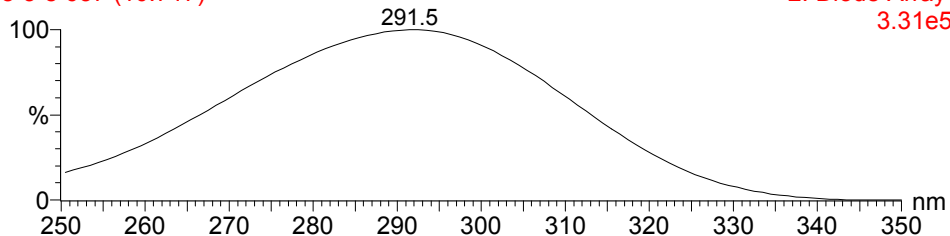

462

2: Diode Array 8-3-8 582 (10.696)

3.31e5

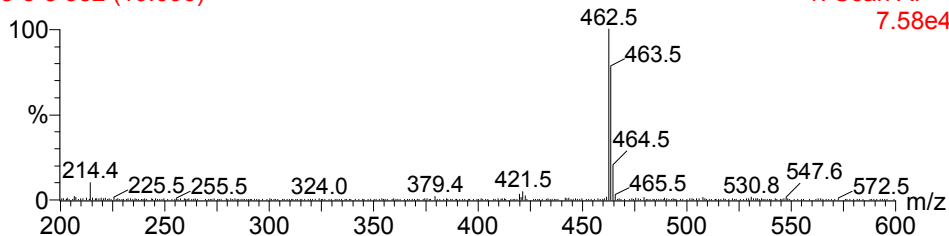

1: Scan AP+

7.58e4

7-3-7

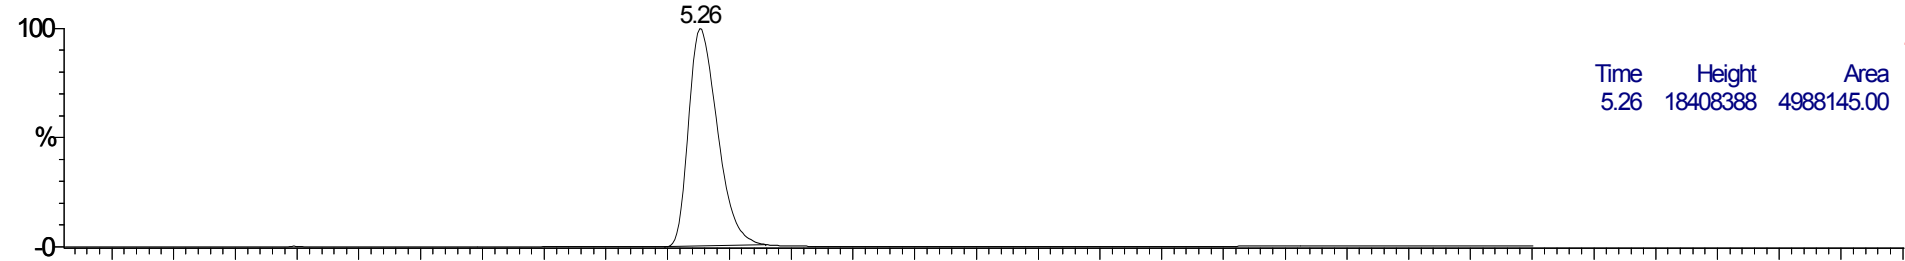

2: Diode Array  
TIC  
1.85e7

| Time | Height   | Area       | Area%  |
|------|----------|------------|--------|
| 5.26 | 18408388 | 4988145.00 | 100.00 |

7-3-8

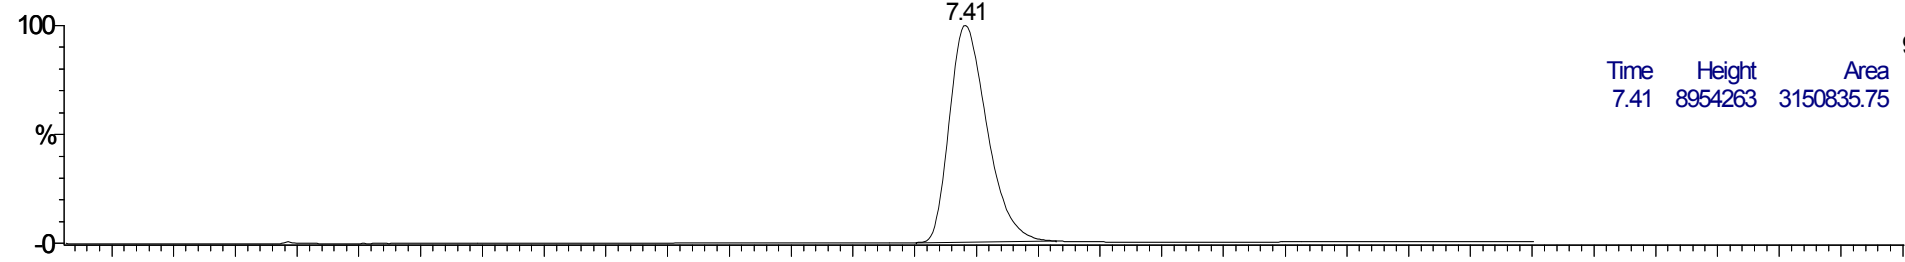

2: Diode Array  
TIC  
9.02e6

| Time | Height  | Area       | Area%  |
|------|---------|------------|--------|
| 7.41 | 8954263 | 3150835.75 | 100.00 |

8-3-1

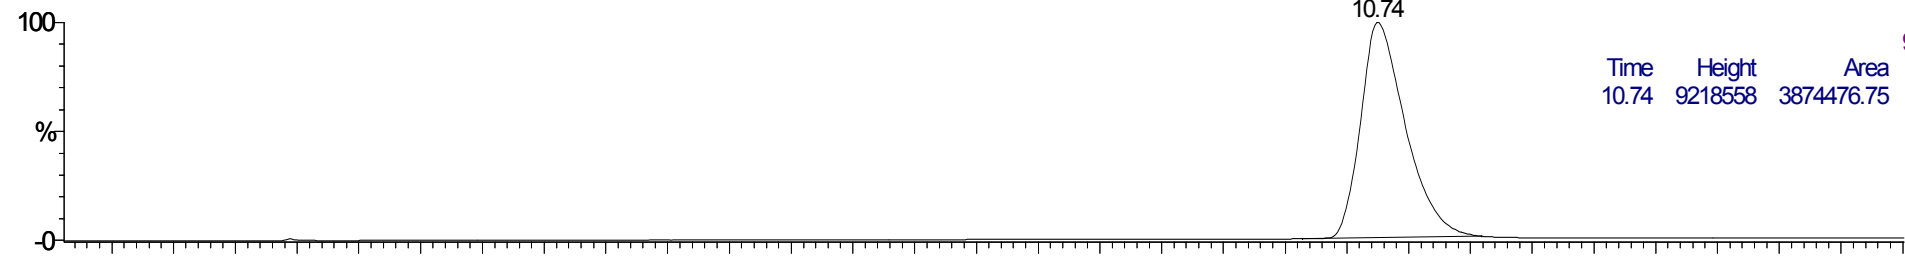

2: Diode Array  
TIC  
9.34e6

| Time  | Height  | Area       | Area%  |
|-------|---------|------------|--------|
| 10.74 | 9218558 | 3874476.75 | 100.00 |

8-3-2

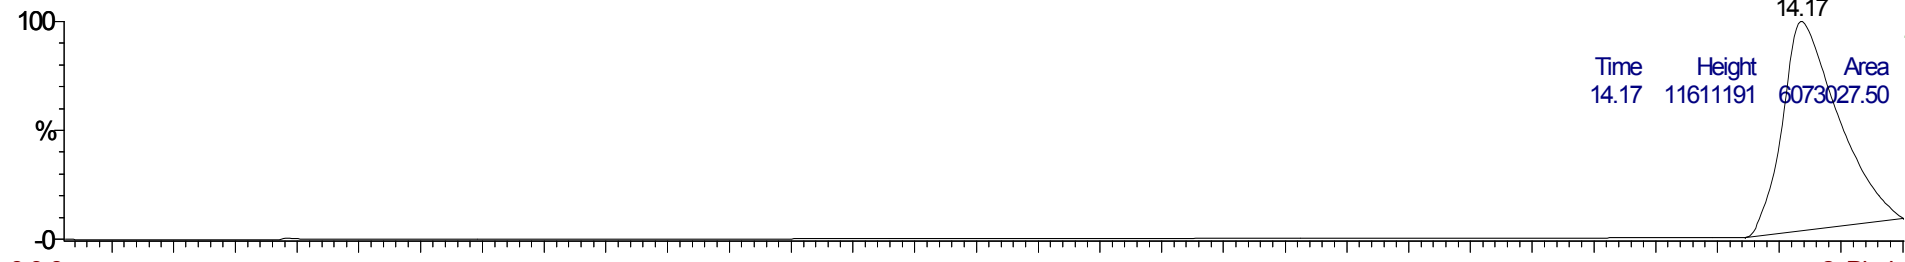

2: Diode Array  
TIC  
1.21e7

| Time  | Height   | Area       | Area%  |
|-------|----------|------------|--------|
| 14.17 | 11611191 | 6073027.50 | 100.00 |

8-3-8

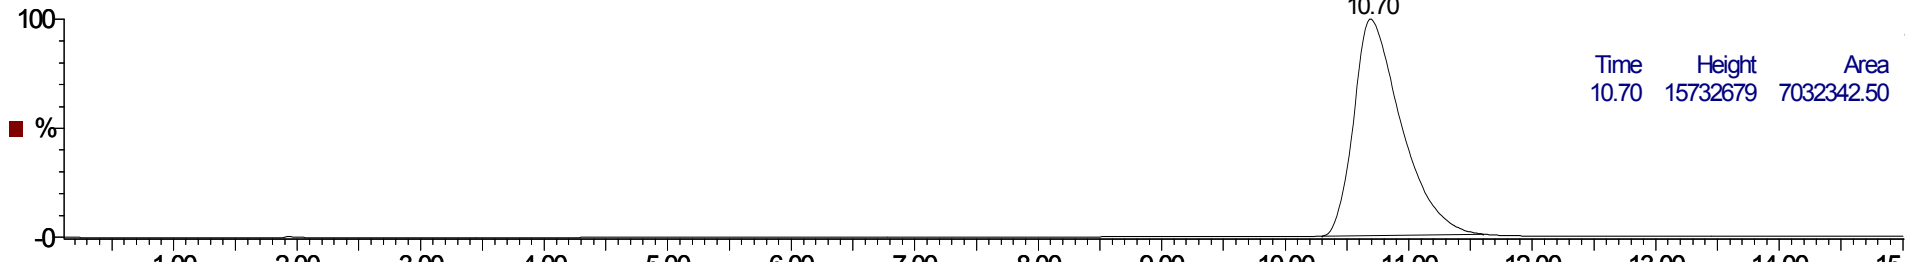

2: Diode Array  
TIC  
1.59e7

| Time  | Height   | Area       | Area%  |
|-------|----------|------------|--------|
| 10.70 | 15732679 | 7032342.50 | 100.00 |

■ %

1.00 2.00 3.00 4.00 5.00 6.00 7.00 8.00 9.00 10.00 11.00 12.00 13.00 14.00 15.00 Time



462

2-4-7 405 (6.857)

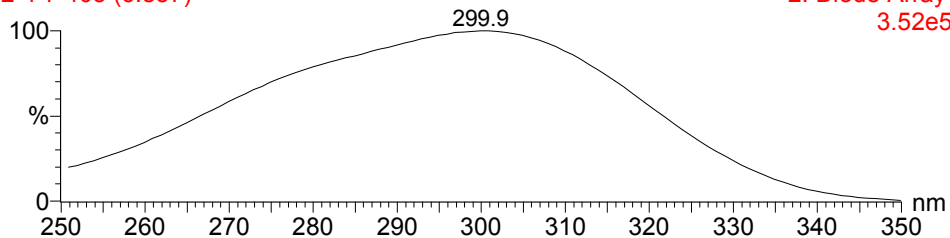

498

2: Diode Array 7-4-7 239 (4.407)

3.52e5

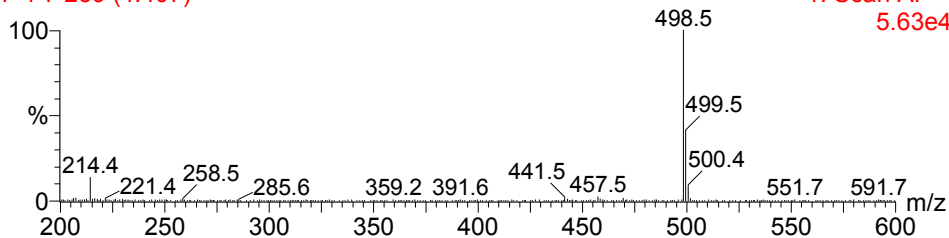

1: Scan AP+ 5.63e4

498

7-4-8 391 (6.622)

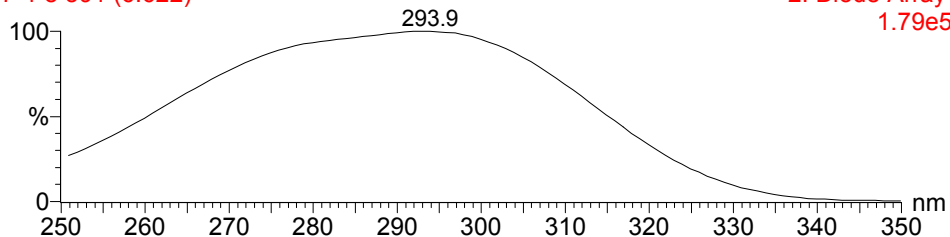

498

2: Diode Array 7-4-8 361 (6.644)

1.79e5

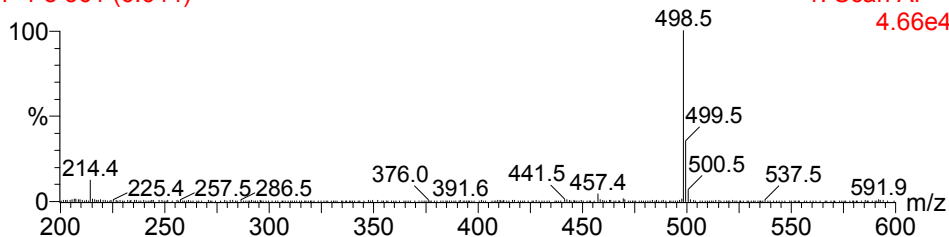

1: Scan AP+ 4.66e4

480

8-4-1 523 (8.817)

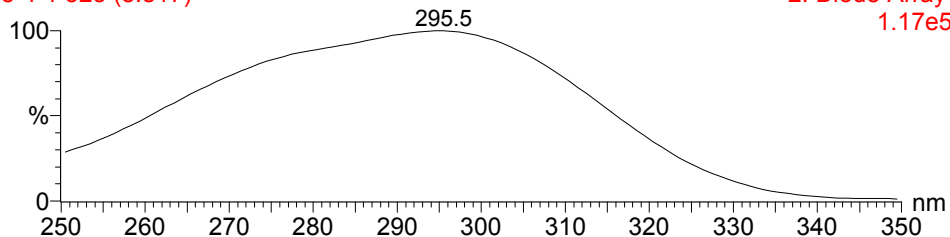

480

2: Diode Array 8-4-1 482 (8.862)

1.17e5

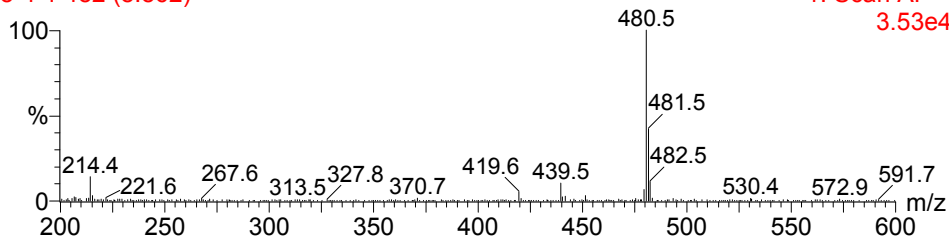

1: Scan AP+ 3.53e4

462

8-4-2 628 (10.582)

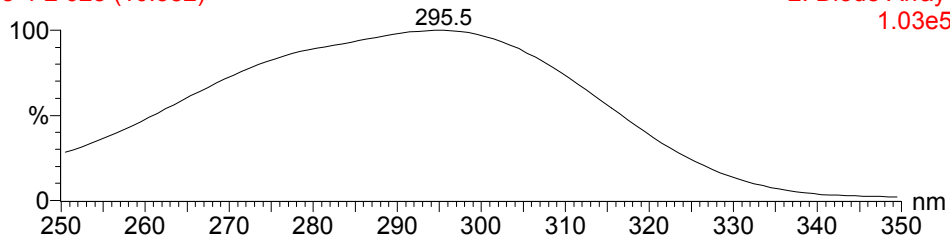

462

2: Diode Array 8-4-2 577 (10.604)

1.03e5

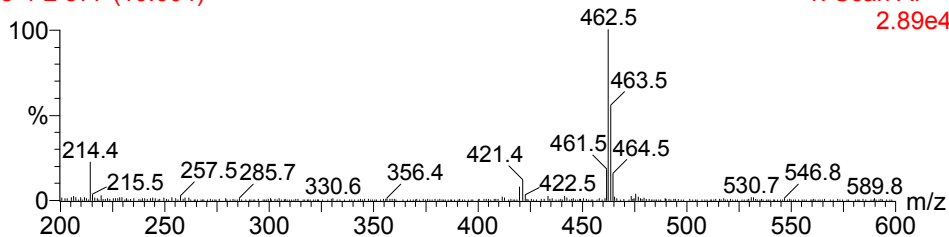

1: Scan AP+ 2.89e4

498

8-4-8 582 (9.813)

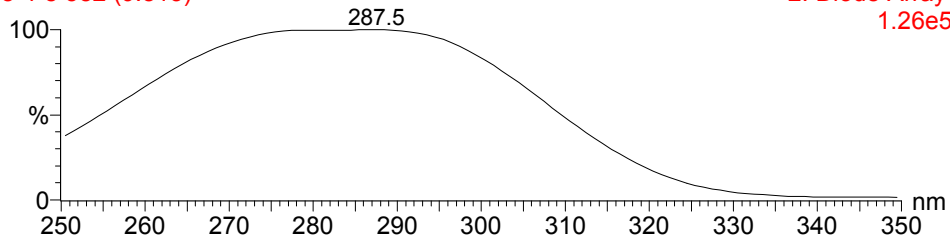

498

2: Diode Array 8-4-8 535 (9.834)

1.26e5

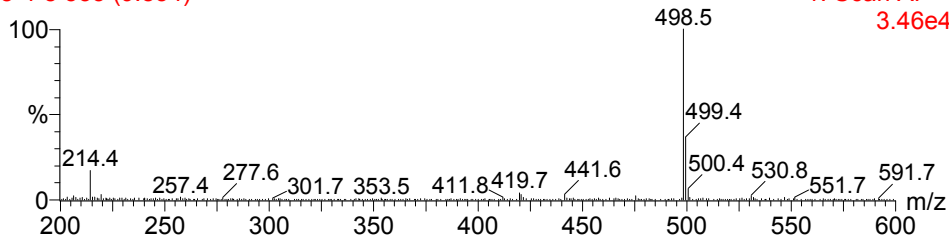

1: Scan AP+ 3.46e4

7-4-7

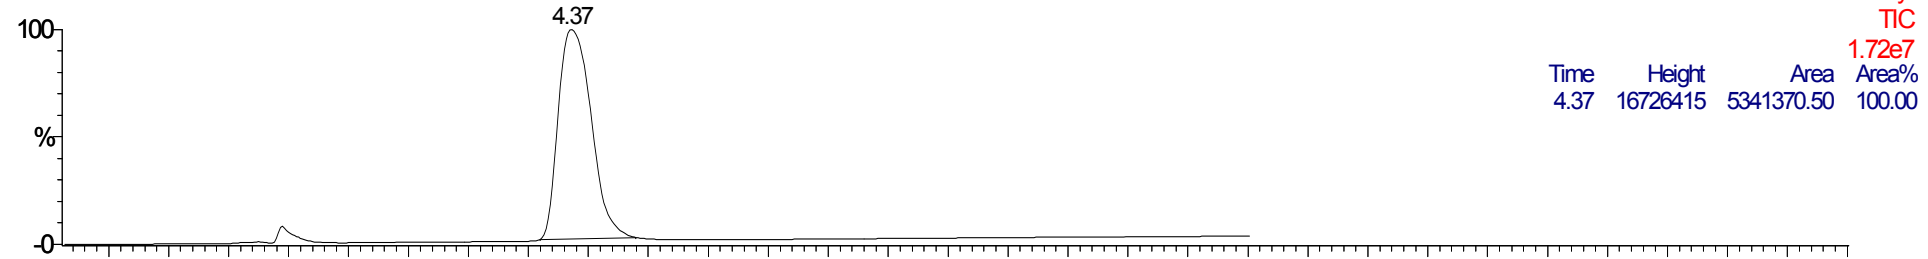

7-4-8

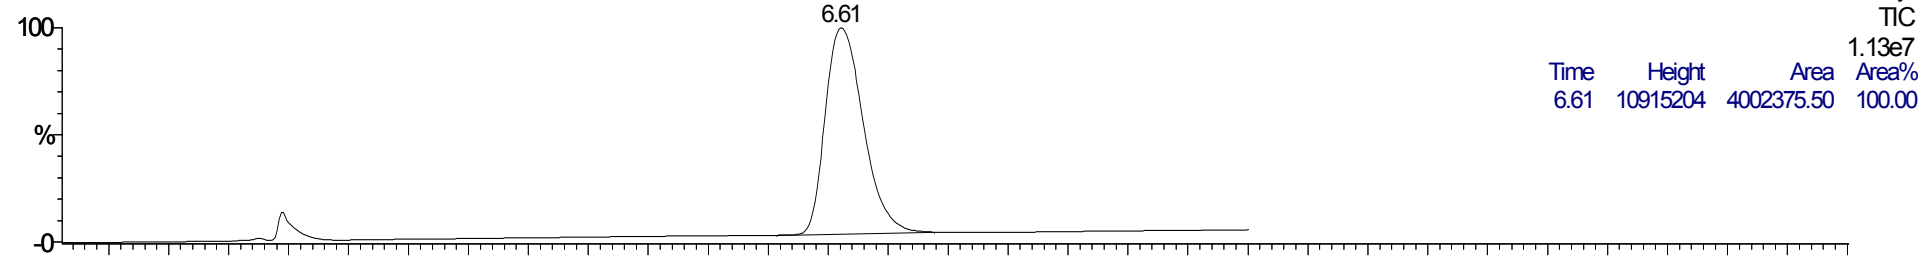

8-4-1

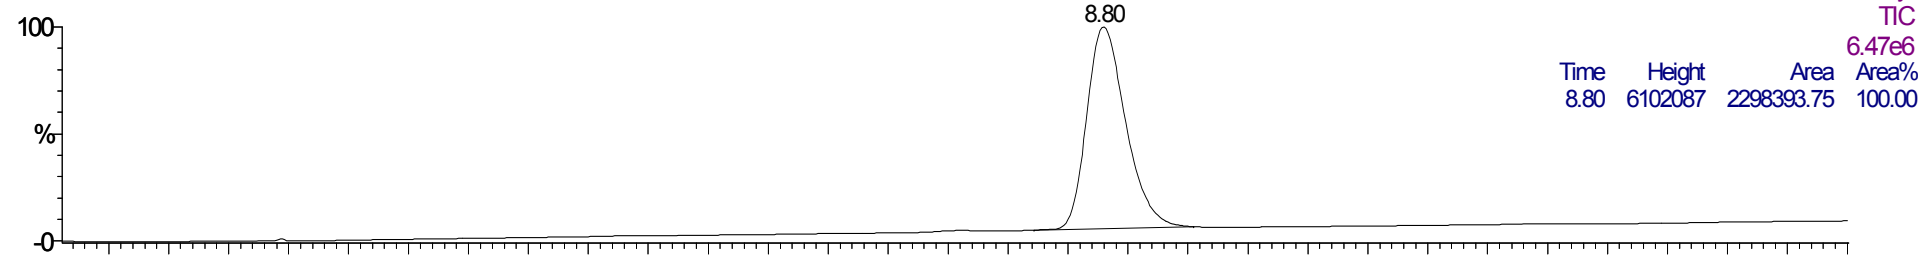

8-4-2

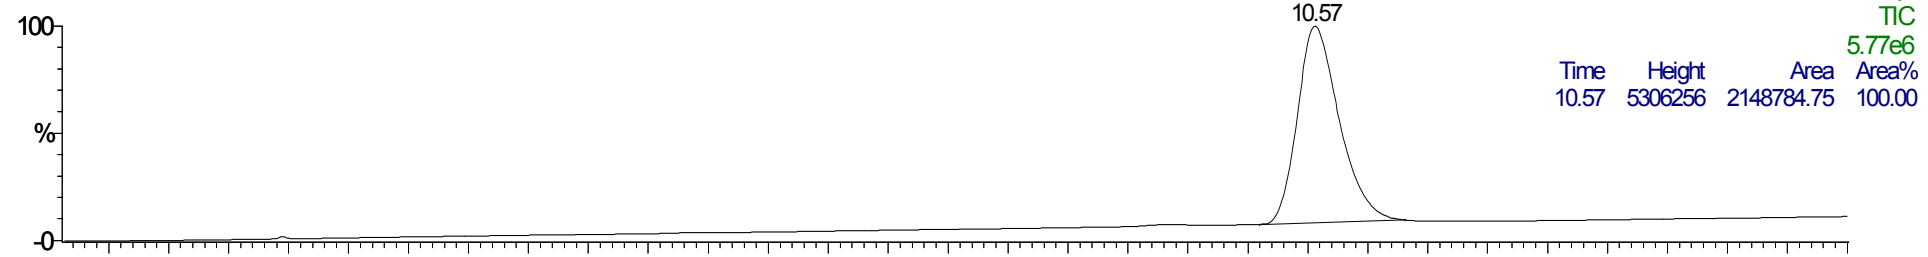

8-4-8

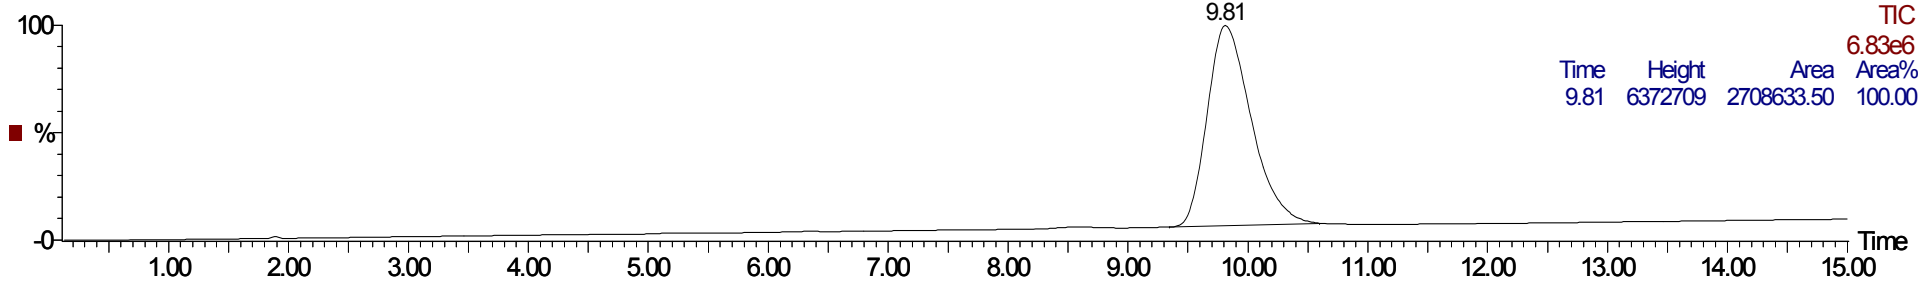

462

8-5-1 479 (8.083)

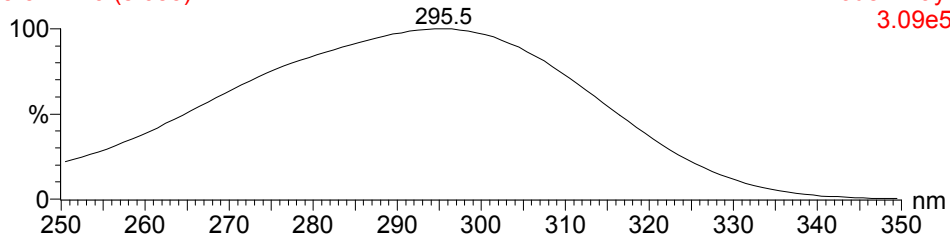

462

2: Diode Array 8-5-1 445 (8.184)

3.09e5

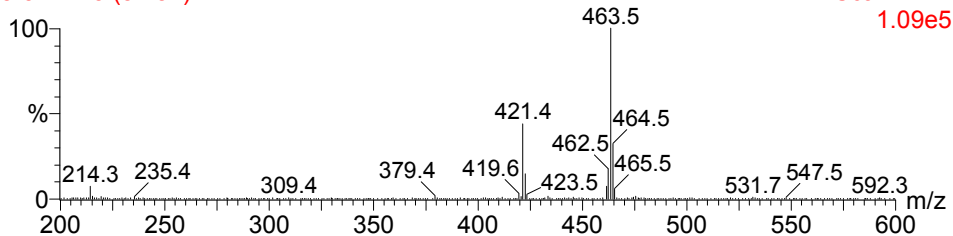

1: Scan AP+

1.09e5

444

8-5-2 627 (10.565)

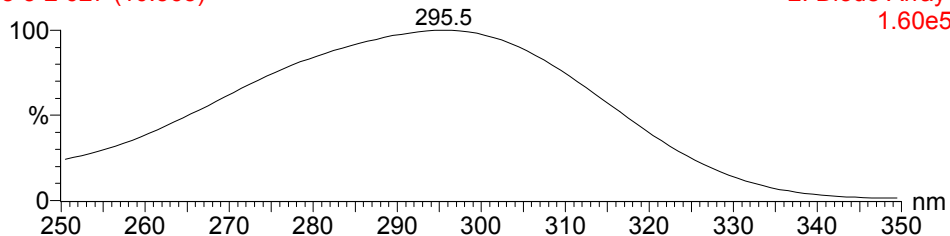

444

2: Diode Array 8-5-2 574 (10.549)

1.60e5

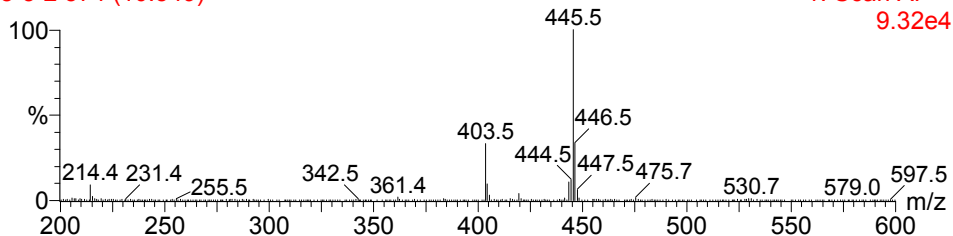

1: Scan AP+

9.32e4

462

8-5-3 543 (9.150)

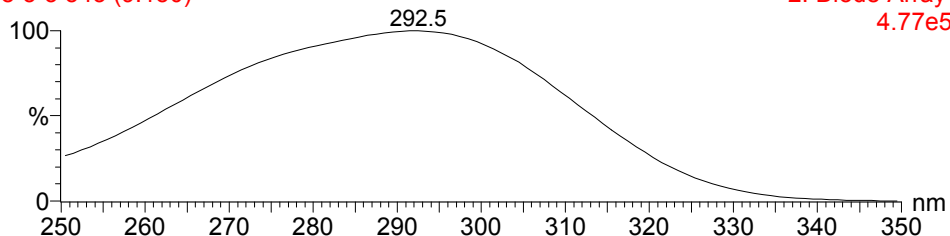

462

2: Diode Array 8-5-3 499 (9.174)

4.77e5

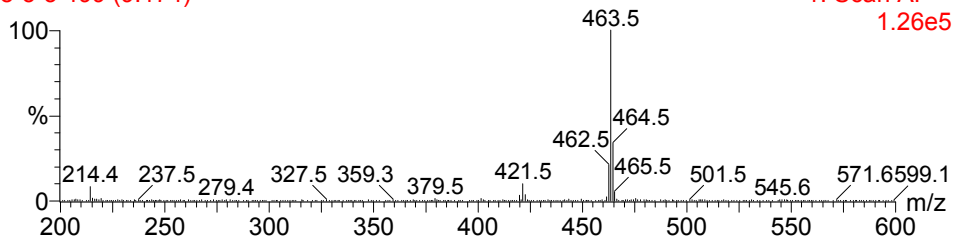

1: Scan AP+

1.26e5

480

8-5-7 339 (5.750)

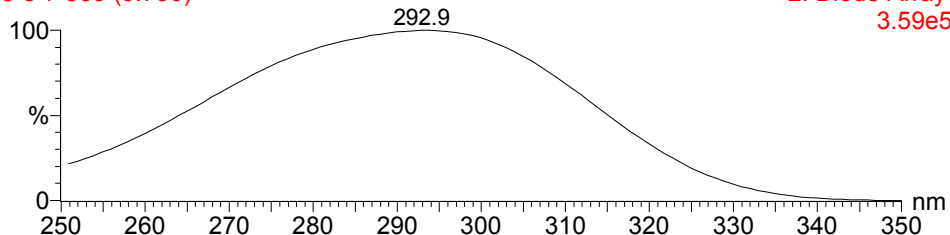

480

2: Diode Array 8-5-7 315 (5.801)

3.59e5

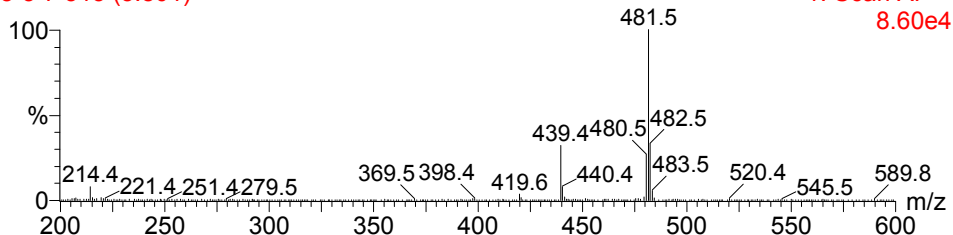

1: Scan AP+

8.60e4

480

8-5-8 493 (8.323)

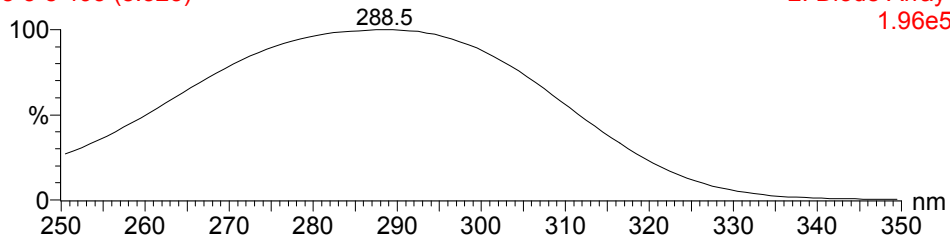

480

2: Diode Array 8-5-8 450 (8.276)

1.96e5

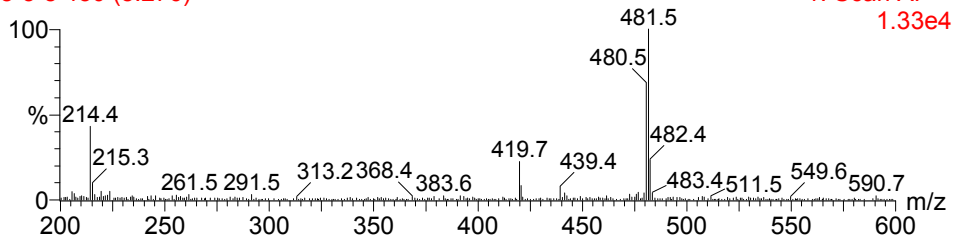

1: Scan AP+

1.33e4

8-5-1

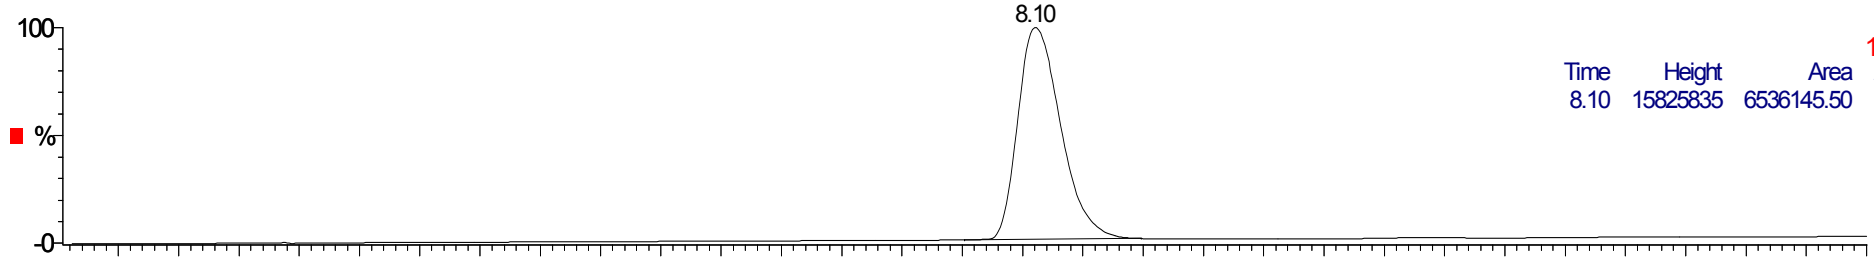

2: Diode Array  
TIC  
1.61e7

| Time | Height   | Area       | Area%  |
|------|----------|------------|--------|
| 8.10 | 15825835 | 6536145.50 | 100.00 |

8-5-2

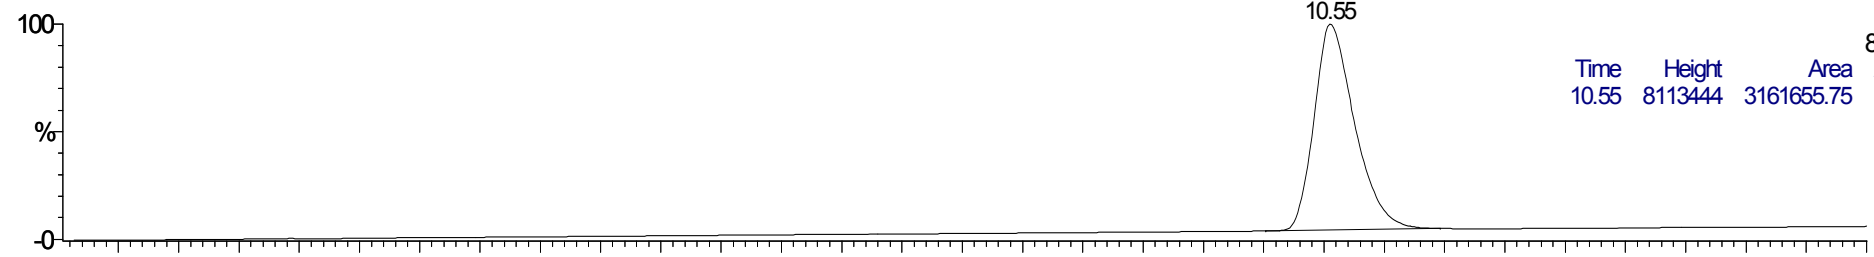

2: Diode Array  
TIC  
8.47e6

| Time  | Height  | Area       | Area%  |
|-------|---------|------------|--------|
| 10.55 | 8113444 | 3161655.75 | 100.00 |

8-5-3

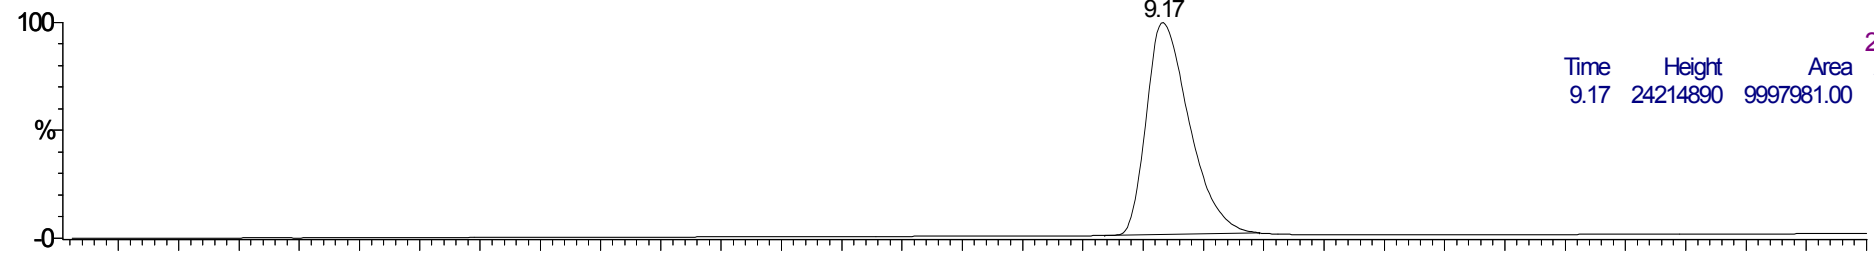

2: Diode Array  
TIC  
2.46e7

| Time | Height   | Area       | Area%  |
|------|----------|------------|--------|
| 9.17 | 24214890 | 9997981.00 | 100.00 |

8-5-7

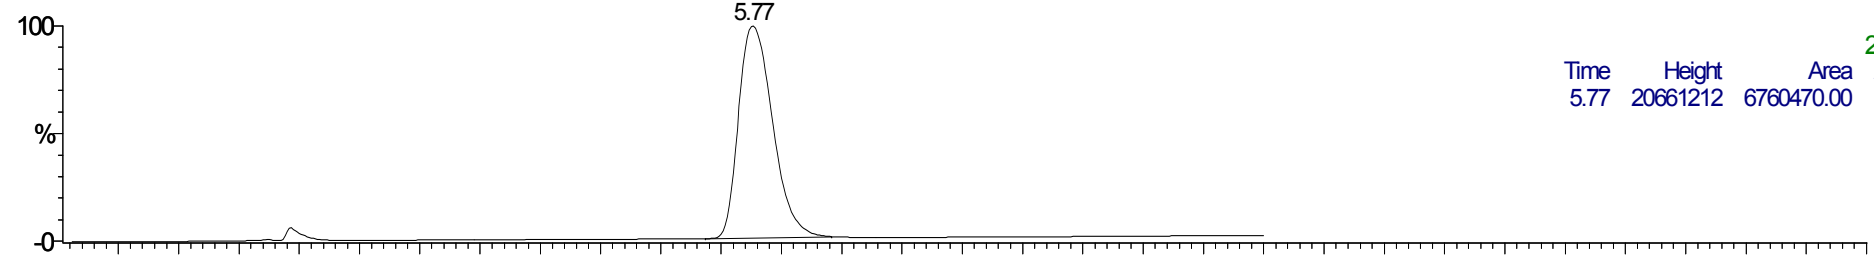

2: Diode Array  
TIC  
2.10e7

| Time | Height   | Area       | Area%  |
|------|----------|------------|--------|
| 5.77 | 20661212 | 6760470.00 | 100.00 |

8-5-8

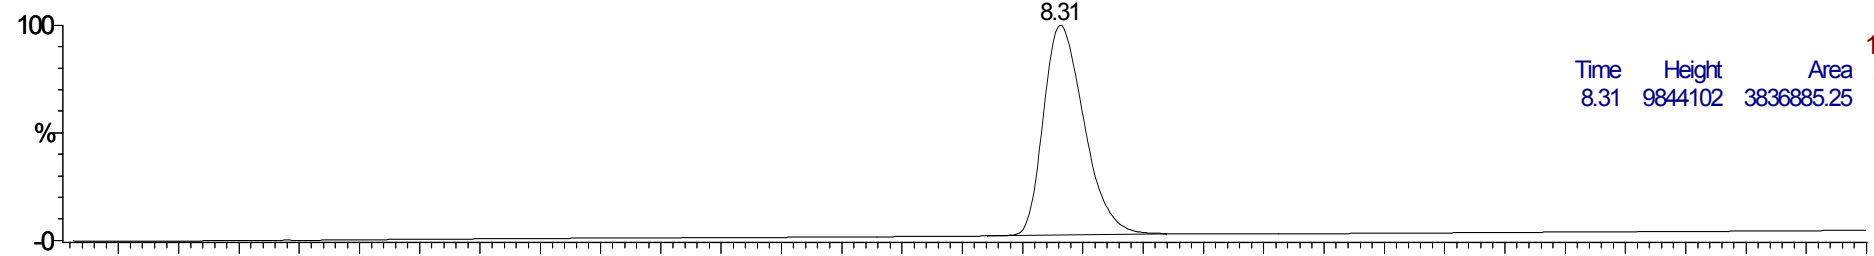

2: Diode Array  
TIC  
1.01e7

| Time | Height  | Area       | Area%  |
|------|---------|------------|--------|
| 8.31 | 9844102 | 3836885.25 | 100.00 |

Time

480

8-6-1 407 (6.893)

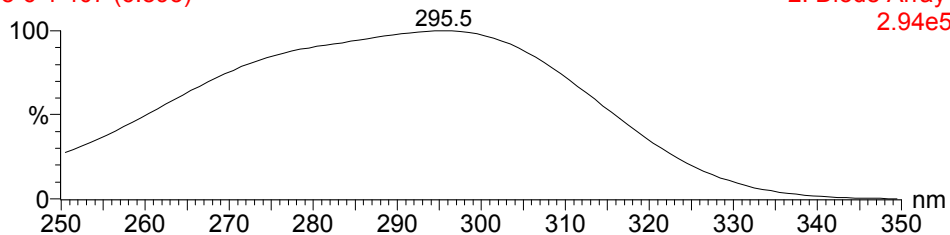

480

2: Diode Array 8-6-1 374 (6.882)

2.94e5

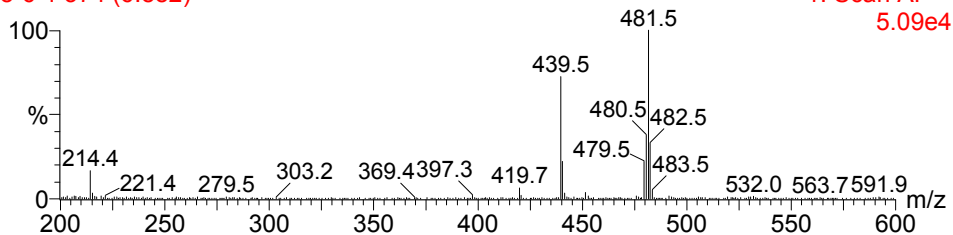

1: Scan AP+

5.09e4

462

8-6-2 513 (8.660)

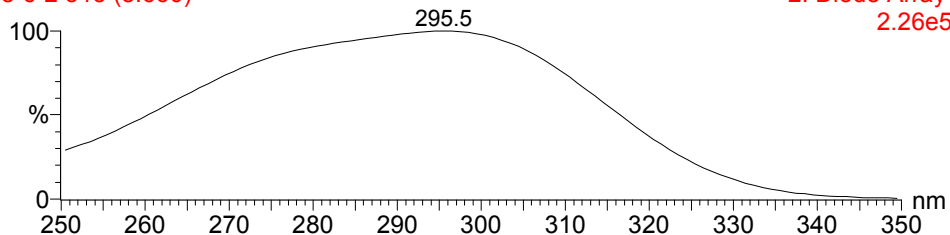

462

2: Diode Array 8-6-2 473 (8.697)

2.26e5

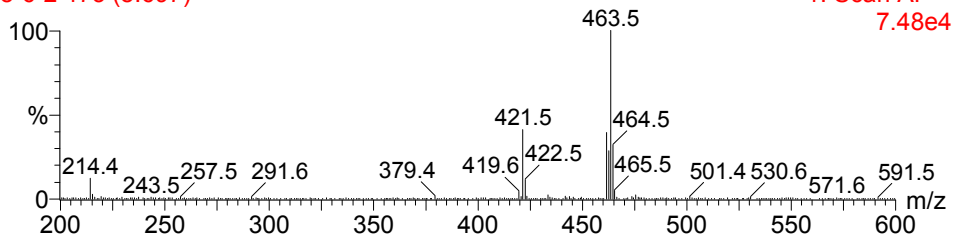

1: Scan AP+

7.48e4

480

8-6-3 536 (9.042)

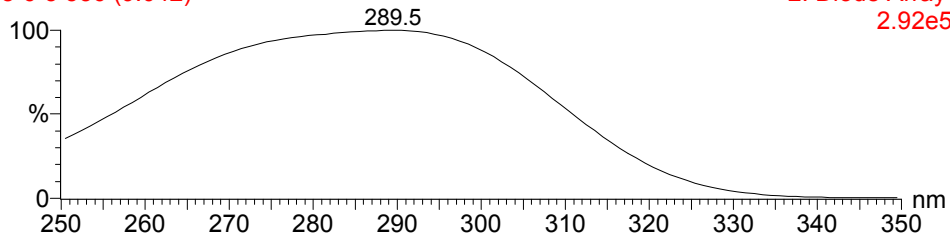

480

2: Diode Array 8-6-3 491 (9.027)

2.92e5

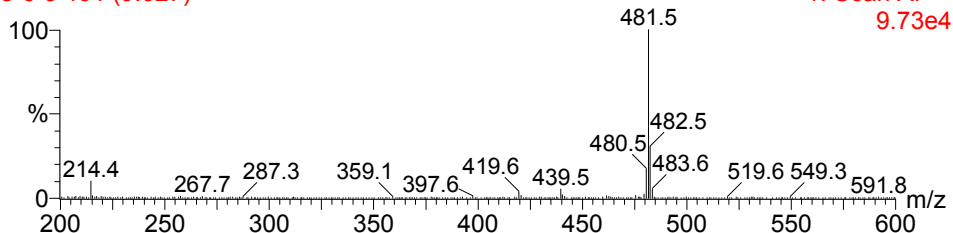

1: Scan AP+

9.73e4

498

8-6-7 298 (5.073)

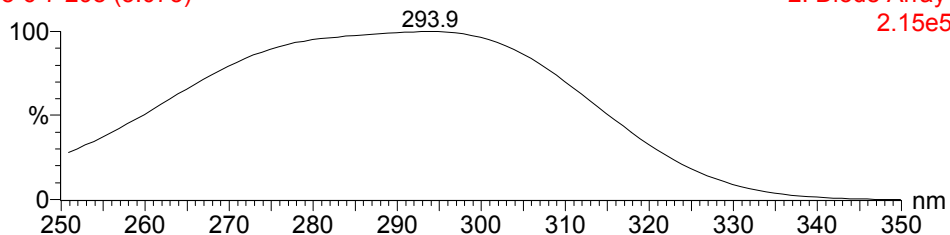

498

2: Diode Array 8-6-7 278 (5.122)

2.15e5

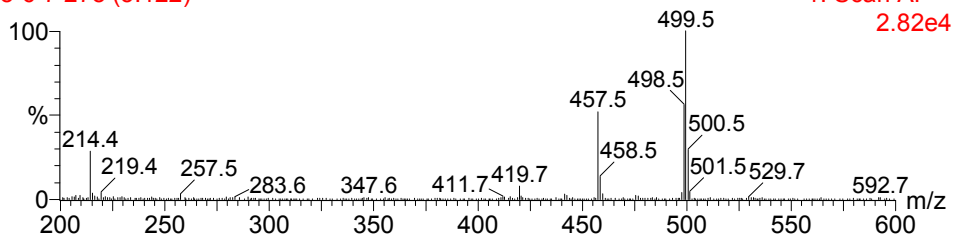

1: Scan AP+

2.82e4

498

8-6-8 479 (8.097)

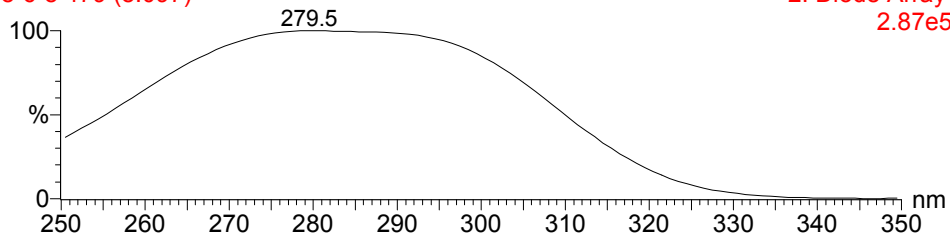

498

2: Diode Array 8-6-8 438 (8.056)

2.87e5

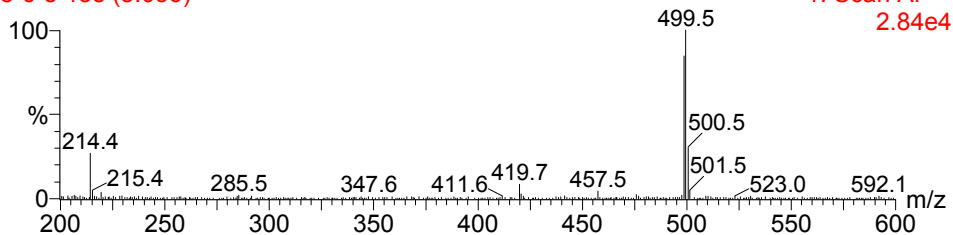

1: Scan AP+

2.84e4

8-6-1

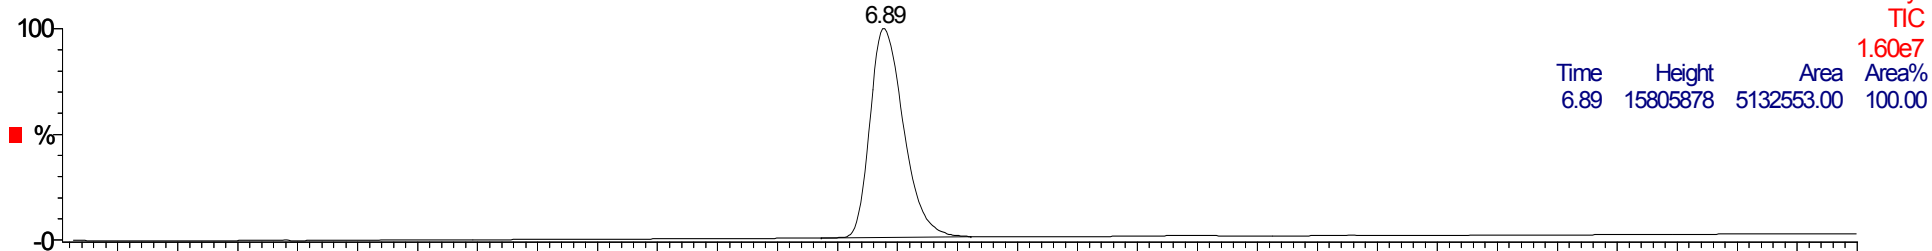

8-6-2

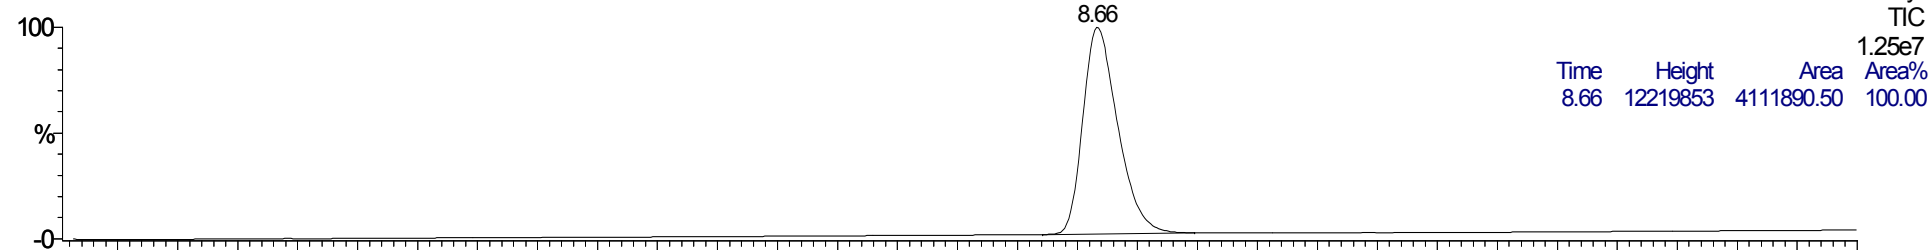

8-6-3

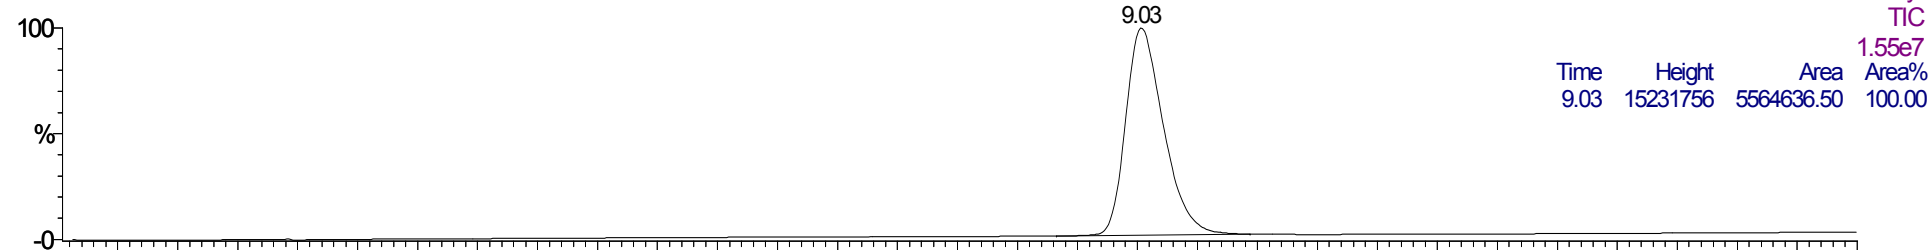

8-6-7

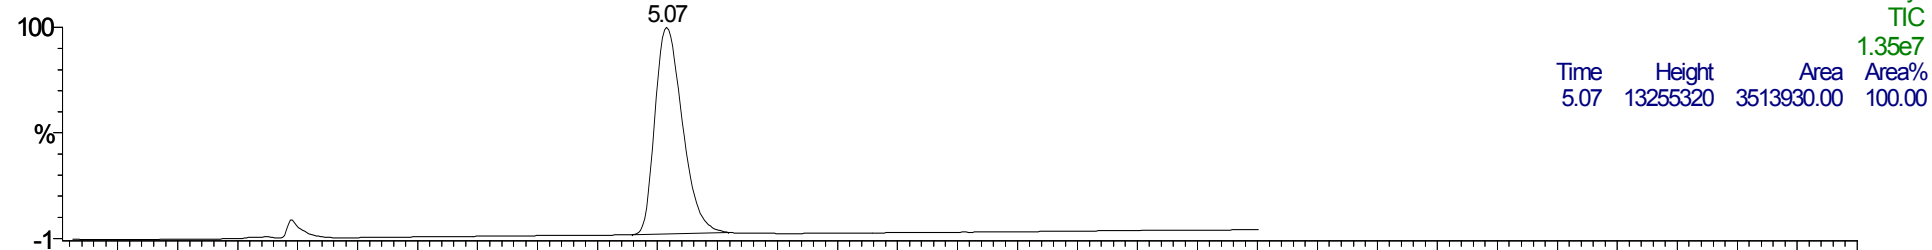

8-6-8

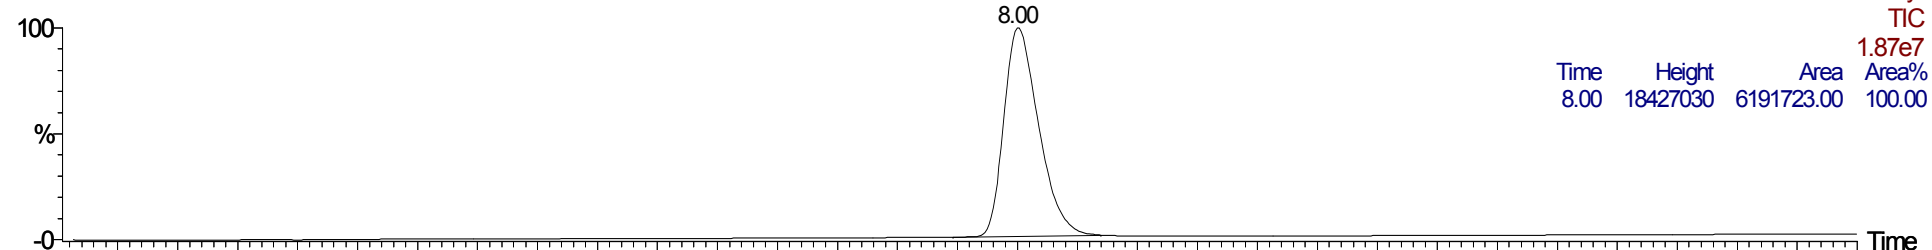

2: Diode Array  
TIC

1.60e7

| Time | Height   | Area       | Area%  |
|------|----------|------------|--------|
| 6.89 | 15805878 | 5132553.00 | 100.00 |

2: Diode Array  
TIC

1.25e7

| Time | Height   | Area       | Area%  |
|------|----------|------------|--------|
| 8.66 | 12219853 | 4111890.50 | 100.00 |

2: Diode Array  
TIC

1.55e7

| Time | Height   | Area       | Area%  |
|------|----------|------------|--------|
| 9.03 | 15231756 | 5564636.50 | 100.00 |

2: Diode Array  
TIC

1.35e7

| Time | Height   | Area       | Area%  |
|------|----------|------------|--------|
| 5.07 | 13255320 | 3513930.00 | 100.00 |

2: Diode Array  
TIC

1.87e7

| Time | Height   | Area       | Area%  |
|------|----------|------------|--------|
| 8.00 | 18427030 | 6191723.00 | 100.00 |

Time

462

8-7-1 510 (8.603)

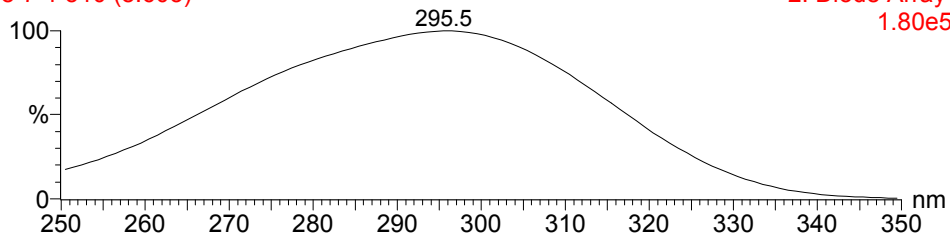

2: Diode Array 8-7-1 472 (8.679)

1.80e5

462

8-7-1 472 (8.679)

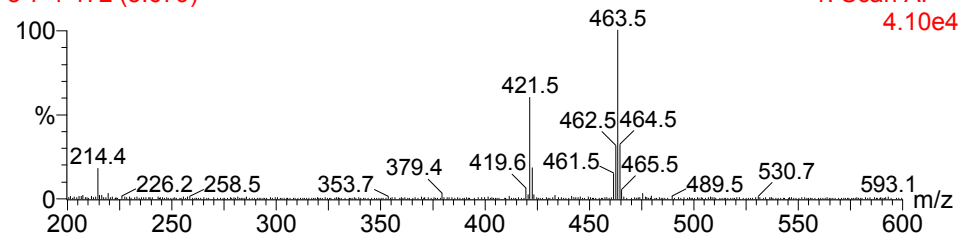

1: Scan AP+

4.10e4

444

8-7-2 660 (11.103)

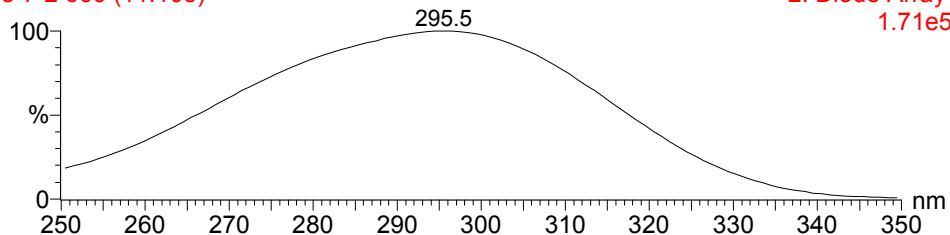

2: Diode Array 8-7-2 604 (11.099)

1.71e5

444

8-7-2 604 (11.099)

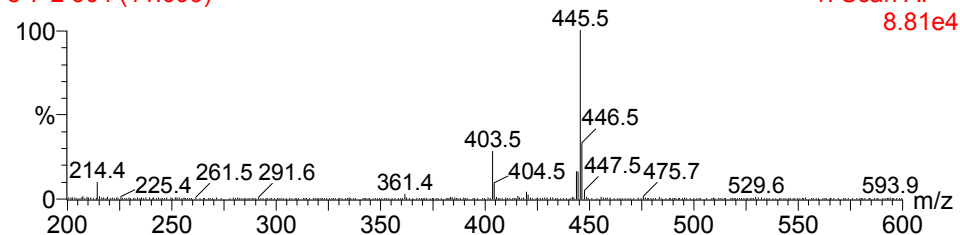

1: Scan AP+

8.81e4

462

8-7-3 674 (11.338)

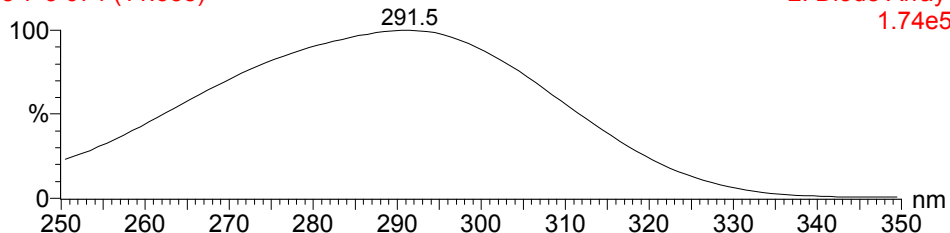

2: Diode Array 8-7-3 620 (11.392)

1.74e5

462

8-7-3 620 (11.392)

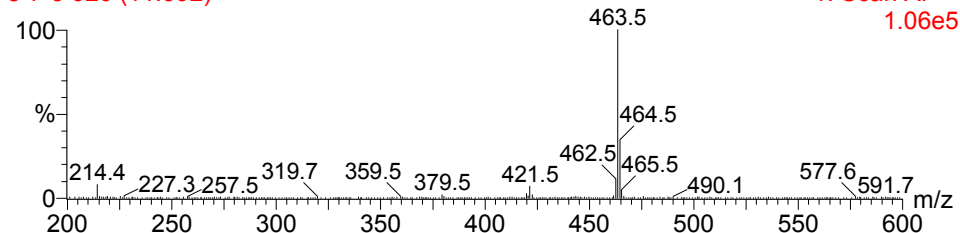

1: Scan AP+

1.06e5

480

8-7-7 366 (6.202)

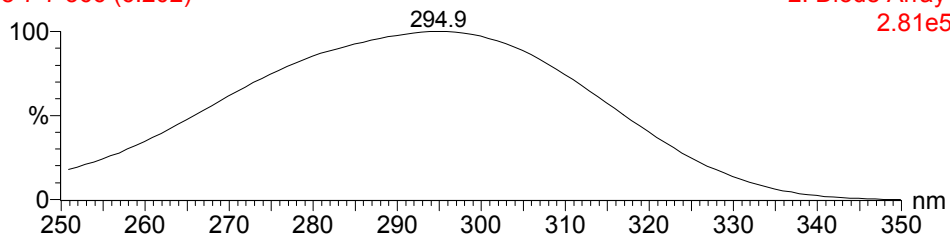

2: Diode Array 8-7-7 338 (6.222)

2.81e5

480

8-7-7 338 (6.222)

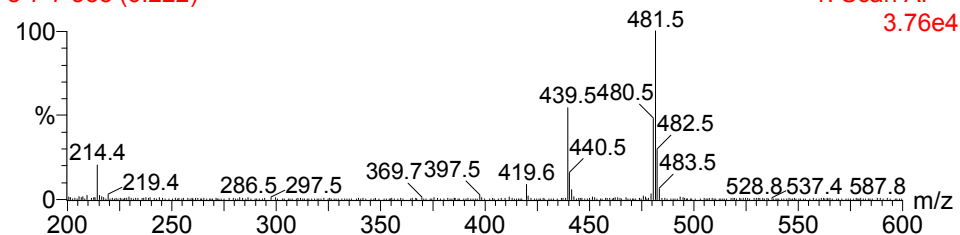

1: Scan AP+

3.76e4

480

8-7-8 609 (10.258)

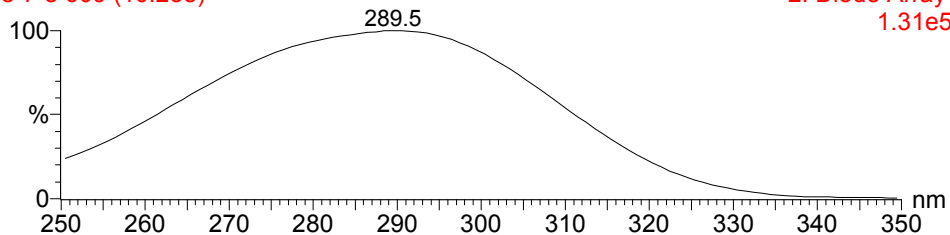

2: Diode Array 8-7-8 559 (10.274)

1.31e5

480

8-7-8 559 (10.274)

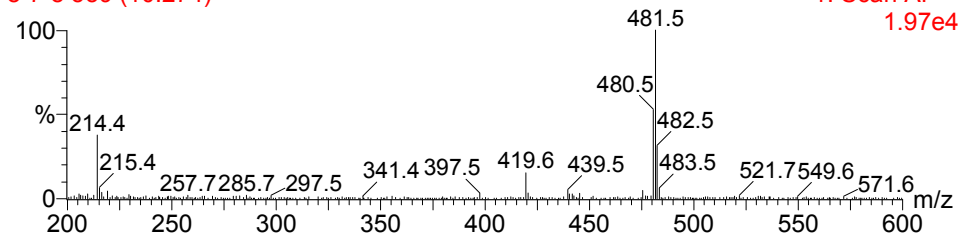

1: Scan AP+

1.97e4

8-7-1

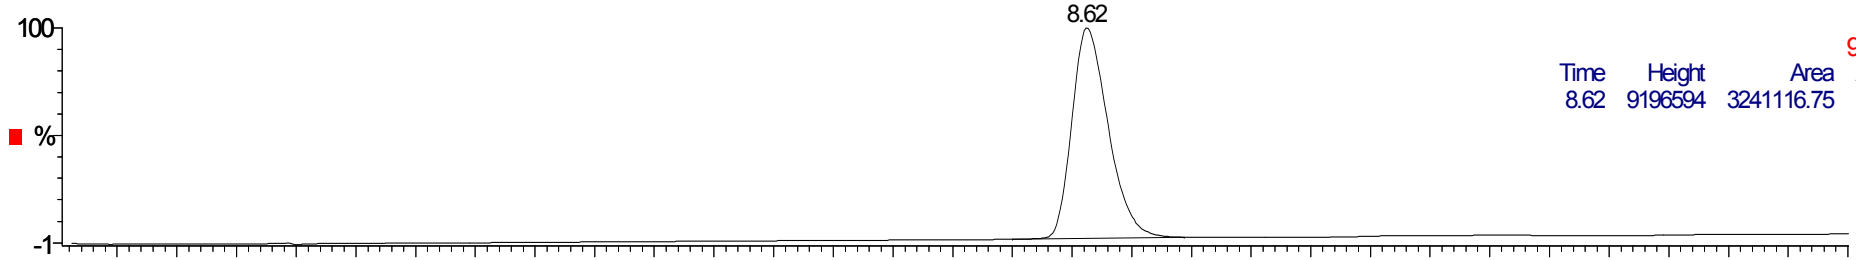

2: Diode Array  
TIC  
9.39e6

| Time | Height  | Area       | Area%  |
|------|---------|------------|--------|
| 8.62 | 9196594 | 3241116.75 | 100.00 |

8-7-2

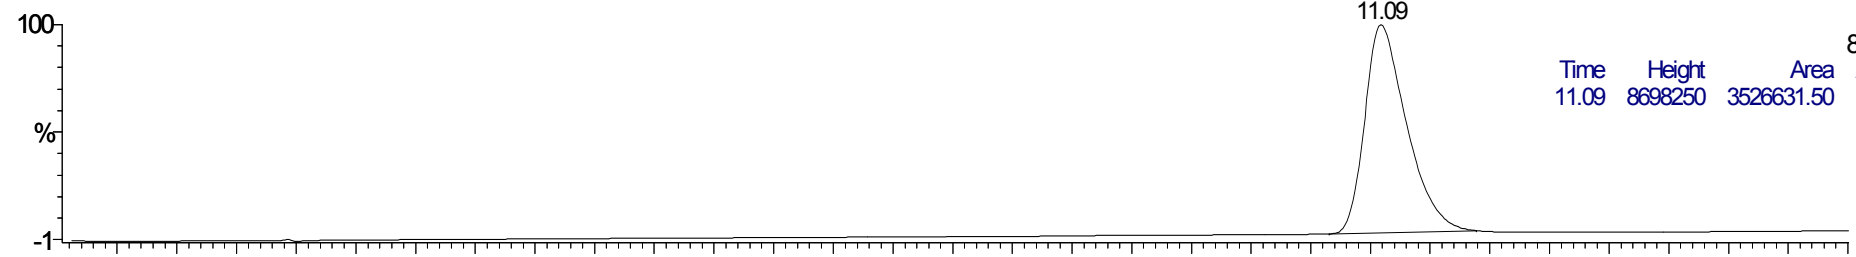

2: Diode Array  
TIC  
8.99e6

| Time  | Height  | Area       | Area%  |
|-------|---------|------------|--------|
| 11.09 | 8698250 | 3526631.50 | 100.00 |

8-7-3

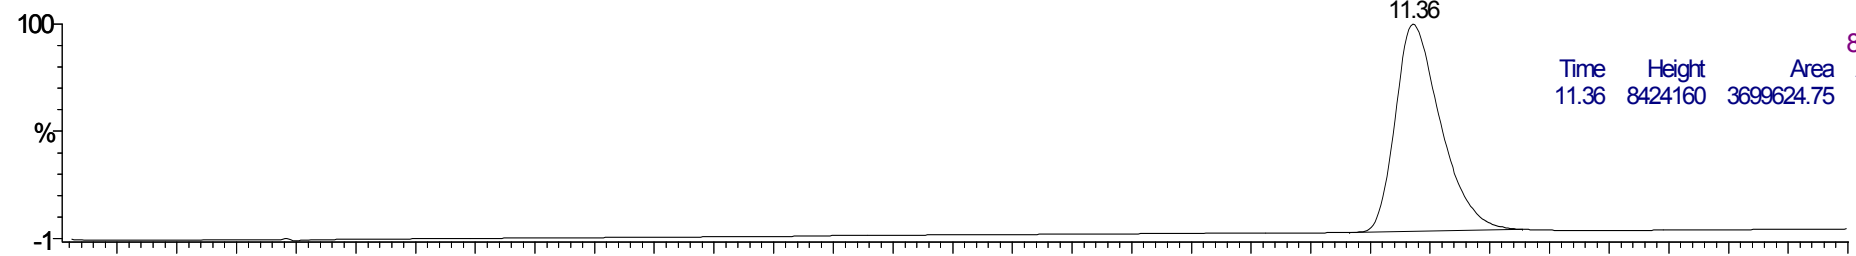

2: Diode Array  
TIC  
8.72e6

| Time  | Height  | Area       | Area%  |
|-------|---------|------------|--------|
| 11.36 | 8424160 | 3699624.75 | 100.00 |

8-7-7

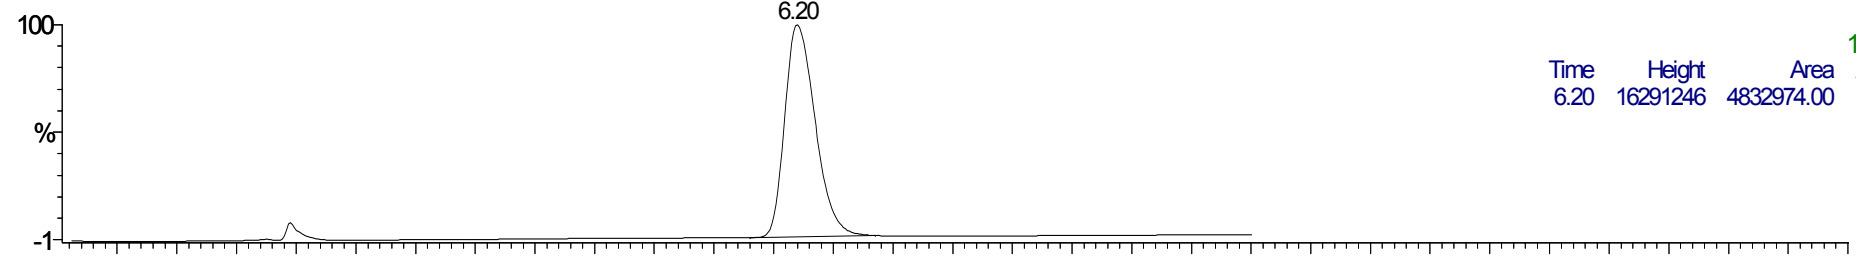

2: Diode Array  
TIC  
1.65e7

| Time | Height   | Area       | Area%  |
|------|----------|------------|--------|
| 6.20 | 16291246 | 4832974.00 | 100.00 |

8-7-8

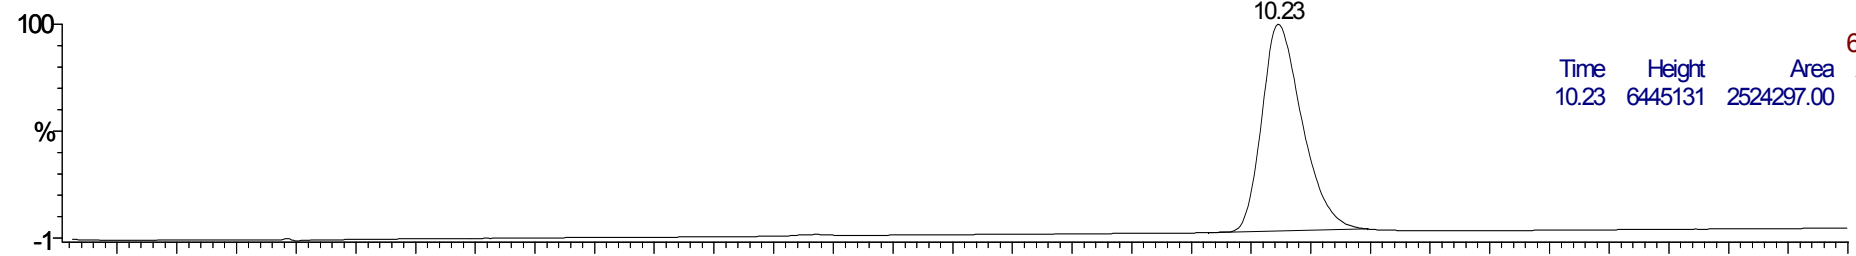

2: Diode Array  
TIC  
6.67e6

| Time  | Height  | Area       | Area%  |
|-------|---------|------------|--------|
| 10.23 | 6445131 | 2524297.00 | 100.00 |

Time

1.00 2.00 3.00 4.00 5.00 6.00 7.00 8.00 9.00 10.00 11.00 12.00 13.00 14.00 15.00



498

8-8-1 462 (7.802)

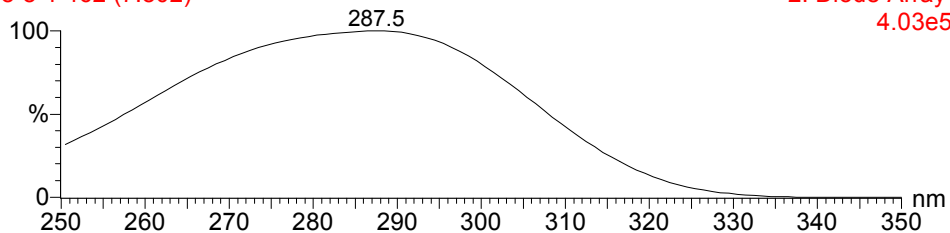

498

2: Diode Array 8-8-1 427 (7.854)

4.03e5

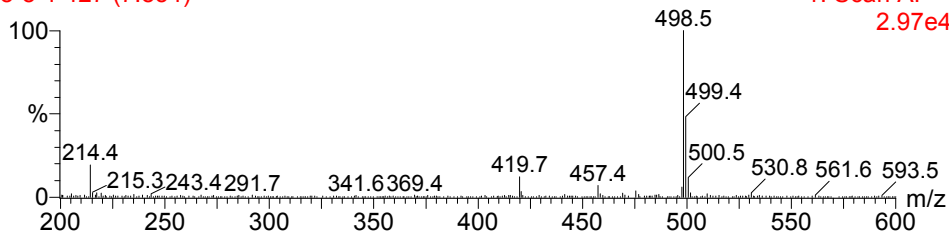

1: Scan AP+

2.97e4

480

8-8-2 541 (9.120)

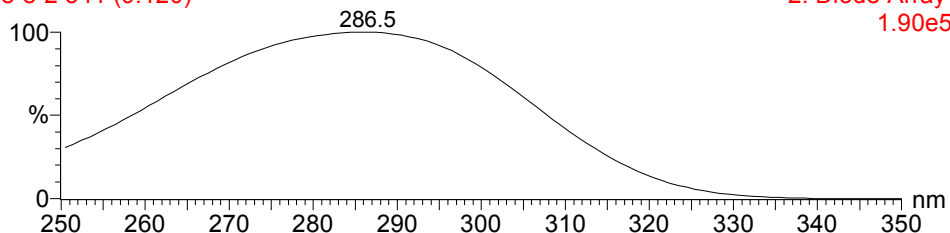

480

2: Diode Array 8-8-2 502 (9.229)

1.90e5

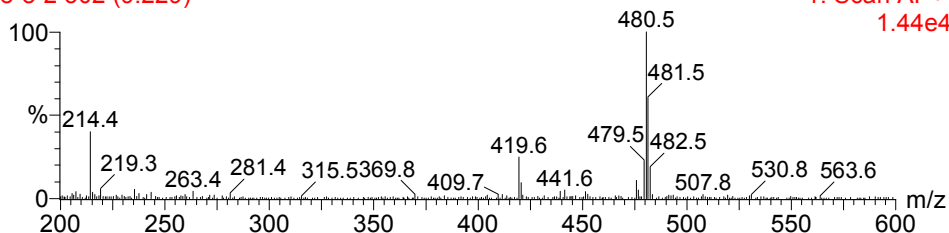

1: Scan AP+

1.44e4

498

8-8-3 540 (9.105)

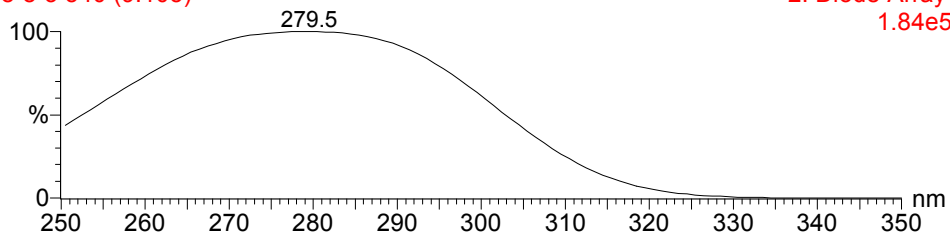

498

2: Diode Array 8-8-3 495 (9.101)

1.84e5

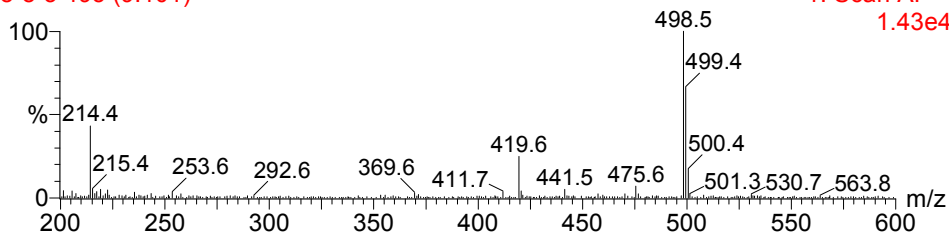

1: Scan AP+

1.43e4

516

8-8-7 352 (5.968)

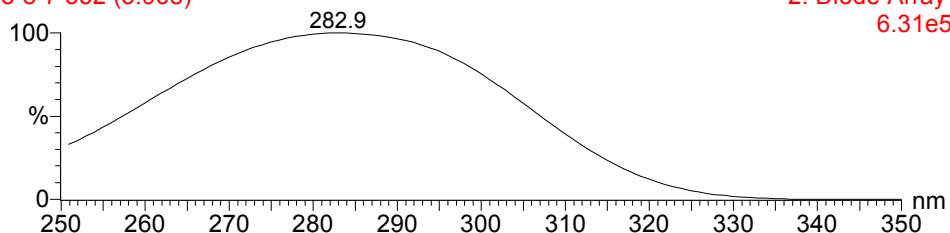

516

2: Diode Array 8-8-8 478 (8.789)

6.31e5

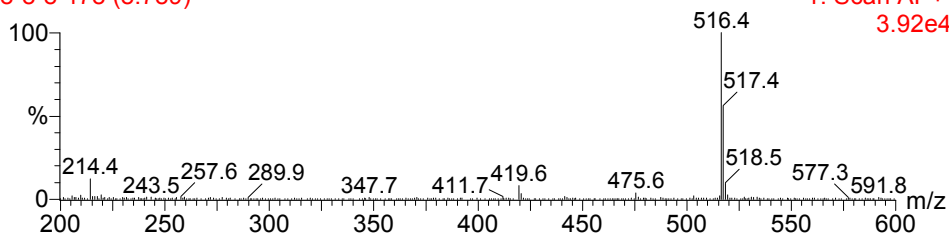

1: Scan AP+

3.92e4

516

8-8-8 518 (8.743)

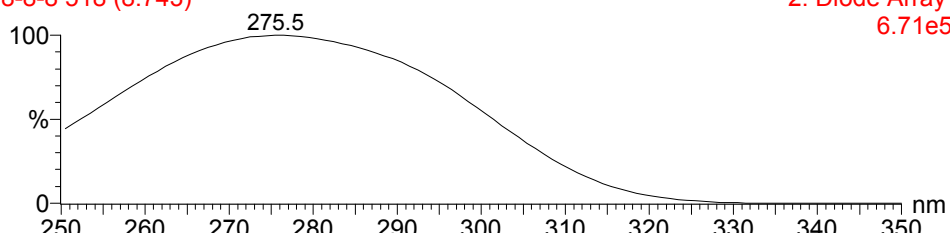

516

2: Diode Array 8-8-8 480 (8.826)

6.71e5

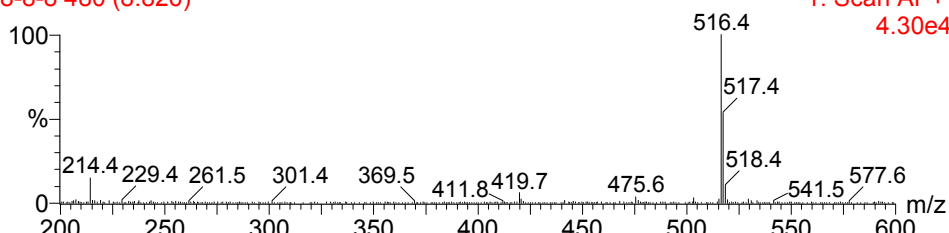

1: Scan AP+

4.30e4

8-8-1

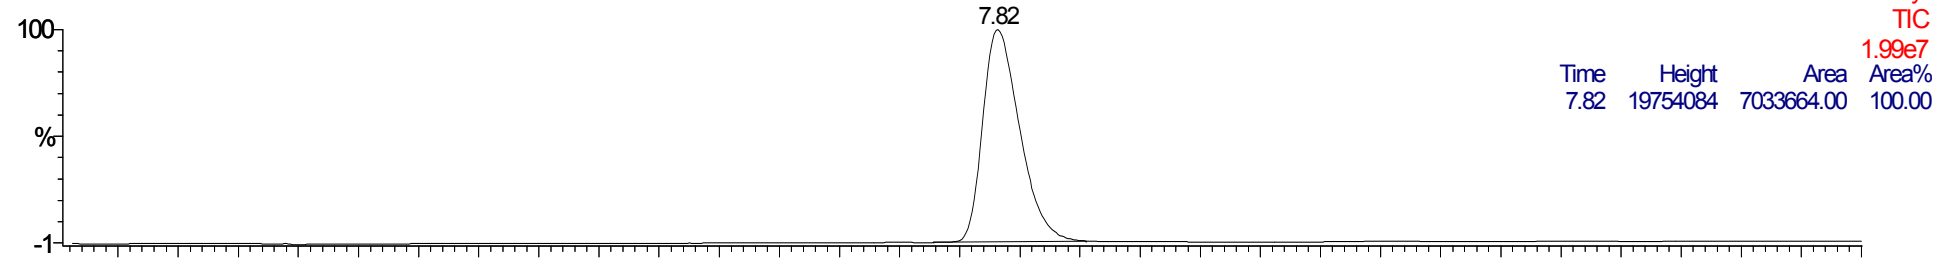

8-8-2

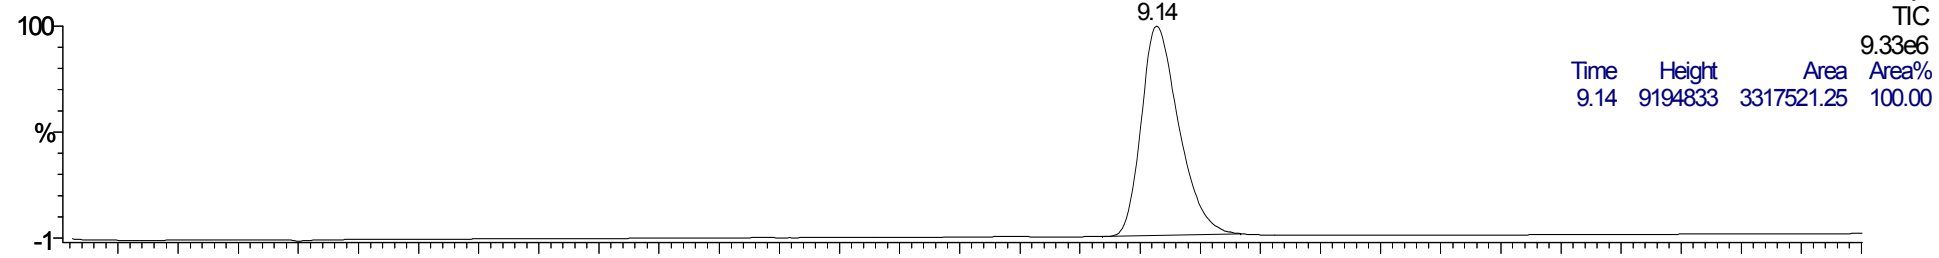

8-8-3

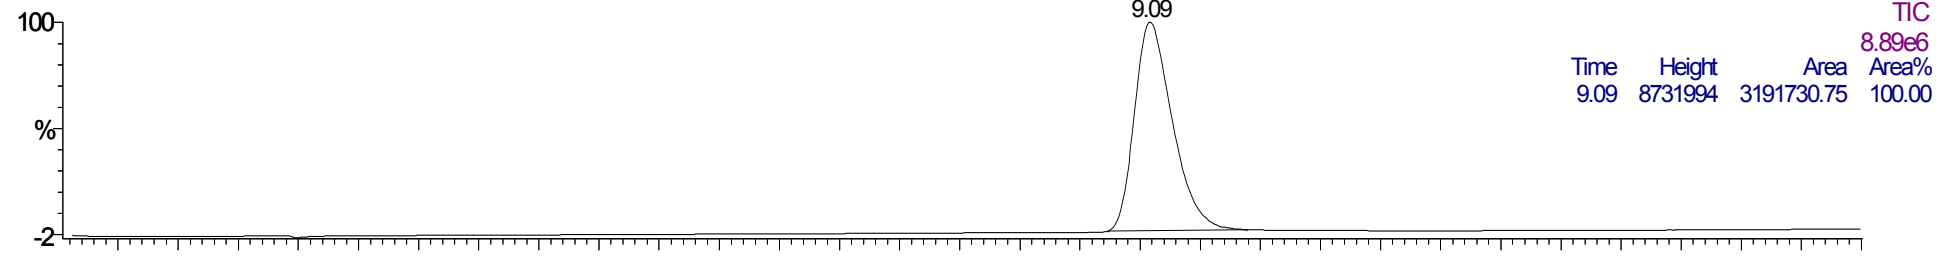

8-8-7

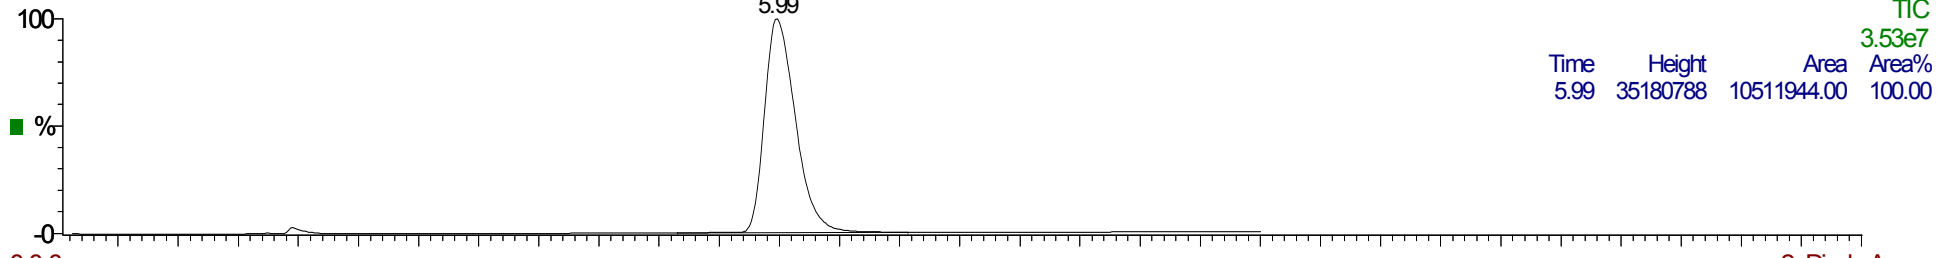

8-8-8

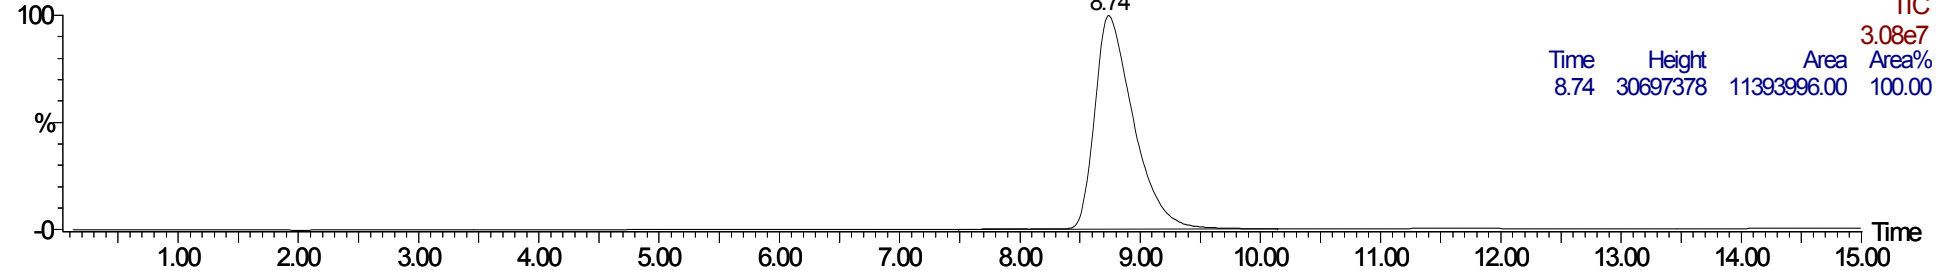

Supplement: b212107g-spectra.pdf [file b212107g-spectra.pdf]
