# Supplementary material for: Combinatorial organic materials research (COMR): design, synthesis and screening of a 225-membered materials library of liquid crystalline fluorinated p-quaterphenylsElectronic supplementary information (ESI) available: tables of product yield and purity, and NMR spectra and HPLC traces.. See http://www.rsc.org/suppdata/ob/b2/b212107g/
Source: Royal Society of Chemistry journal article supplement (doi:10.1039/b212107g), 2003-04-09
Supplement: b212107g-tables.pdf [file b212107g-tables.pdf]

Table 1 Yield and purity of the terphenyls **6**{*T,H,B*}

| Nr | product          | formula                                           | yield <sup>[a]</sup> [%] | purity <sup>[b]</sup> [%] |
|----|------------------|---------------------------------------------------|--------------------------|---------------------------|
| 1  | <b>6</b> {1,1,1} | C <sub>24</sub> H <sub>28</sub> Si                | 100                      | 98                        |
| 2  | <b>6</b> {1,1,2} | C <sub>24</sub> H <sub>27</sub> FSi               | 100                      | 98                        |
| 3  | <b>6</b> {1,1,5} | C <sub>24</sub> H <sub>26</sub> F <sub>2</sub> Si | 100                      | 98                        |
| 4  | <b>6</b> {1,2,1} | C <sub>24</sub> H <sub>27</sub> FSi               | 100                      | 99                        |
| 5  | <b>6</b> {1,2,2} | C <sub>24</sub> H <sub>26</sub> F <sub>2</sub> Si | 100                      | 100                       |
| 6  | <b>6</b> {1,2,5} | C <sub>24</sub> H <sub>25</sub> F <sub>3</sub> Si | 100                      | 99                        |
| 7  | <b>6</b> {1,3,2} | C <sub>24</sub> H <sub>26</sub> F <sub>2</sub> Si | 100                      | 98                        |
| 8  | <b>6</b> {1,3,5} | C <sub>24</sub> H <sub>25</sub> F <sub>3</sub> Si | 100                      | 98                        |
| 9  | <b>6</b> {1,4,1} | C <sub>24</sub> H <sub>26</sub> F <sub>2</sub> Si | 100                      | 100                       |
| 10 | <b>6</b> {1,4,2} | C <sub>24</sub> H <sub>25</sub> F <sub>3</sub> Si | 100                      | 98                        |
| 11 | <b>6</b> {1,4,5} | C <sub>24</sub> H <sub>24</sub> F <sub>4</sub> Si | 100                      | 97                        |
| 12 | <b>6</b> {2,1,1} | C <sub>24</sub> H <sub>27</sub> FSi               | 100                      | 100                       |
| 13 | <b>6</b> {2,1,2} | C <sub>24</sub> H <sub>26</sub> F <sub>2</sub> Si | 100                      | 99                        |
| 14 | <b>6</b> {2,1,5} | C <sub>24</sub> H <sub>25</sub> F <sub>3</sub> Si | 97                       | 98                        |
| 15 | <b>6</b> {2,2,1} | C <sub>24</sub> H <sub>26</sub> F <sub>2</sub> Si | 87                       | 97                        |
| 16 | <b>6</b> {2,2,2} | C <sub>24</sub> H <sub>25</sub> F <sub>3</sub> Si | 86                       | 100                       |
| 17 | <b>6</b> {2,2,5} | C <sub>24</sub> H <sub>24</sub> F <sub>4</sub> Si | 100                      | 98                        |
| 18 | <b>6</b> {2,3,2} | C <sub>24</sub> H <sub>25</sub> F <sub>3</sub> Si | 97                       | 99                        |
| 19 | <b>6</b> {2,3,5} | C <sub>24</sub> H <sub>24</sub> F <sub>4</sub> Si | 100                      | 98                        |
| 20 | <b>6</b> {3,1,1} | C <sub>24</sub> H <sub>27</sub> FSi               | 100                      | 100                       |
| 21 | <b>6</b> {3,1,2} | C <sub>24</sub> H <sub>26</sub> F <sub>2</sub> Si | 100                      | 99                        |
| 22 | <b>6</b> {3,1,5} | C <sub>24</sub> H <sub>25</sub> F <sub>3</sub> Si | 100                      | 98                        |
| 23 | <b>6</b> {3,2,1} | C <sub>24</sub> H <sub>26</sub> F <sub>2</sub> Si | 96                       | 98                        |
| 24 | <b>6</b> {3,2,2} | C <sub>24</sub> H <sub>25</sub> F <sub>3</sub> Si | 100                      | 100                       |
| 25 | <b>6</b> {3,2,5} | C <sub>24</sub> H <sub>24</sub> F <sub>4</sub> Si | 100                      | 99                        |
| 26 | <b>6</b> {3,3,2} | C <sub>24</sub> H <sub>25</sub> F <sub>3</sub> Si | 95                       | 100                       |
| 27 | <b>6</b> {3,3,5} | C <sub>24</sub> H <sub>24</sub> F <sub>4</sub> Si | 100                      | 99                        |
| 28 | <b>6</b> {3,4,1} | C <sub>24</sub> H <sub>25</sub> F <sub>3</sub> Si | 100                      | 100                       |
| 29 | <b>6</b> {3,4,2} | C <sub>24</sub> H <sub>24</sub> F <sub>4</sub> Si | 100                      | 99                        |
| 30 | <b>6</b> {3,4,5} | C <sub>24</sub> H <sub>23</sub> F <sub>5</sub> Si | 100                      | 95                        |
| 31 | <b>6</b> {4,1,1} | C <sub>24</sub> H <sub>26</sub> F <sub>2</sub> Si | 94                       | 100                       |
| 32 | <b>6</b> {4,1,2} | C <sub>24</sub> H <sub>25</sub> F <sub>3</sub> Si | 100                      | 100                       |
| 33 | <b>6</b> {4,1,5} | C <sub>24</sub> H <sub>24</sub> F <sub>4</sub> Si | 100                      | 98                        |
| 34 | <b>6</b> {4,2,1} | C <sub>24</sub> H <sub>25</sub> F <sub>3</sub> Si | 91                       | 98                        |
| 35 | <b>6</b> {4,2,2} | C <sub>24</sub> H <sub>24</sub> F <sub>4</sub> Si | 100                      | 100                       |
| 36 | <b>6</b> {4,2,5} | C <sub>24</sub> H <sub>23</sub> F <sub>5</sub> Si | 100                      | 99                        |
| 37 | <b>6</b> {4,3,2} | C <sub>24</sub> H <sub>24</sub> F <sub>4</sub> Si | 95                       | 100                       |
| 38 | <b>6</b> {4,3,5} | C <sub>24</sub> H <sub>23</sub> F <sub>5</sub> Si | 100                      | 98                        |
| 39 | <b>6</b> {4,4,1} | C <sub>24</sub> H <sub>24</sub> F <sub>4</sub> Si | 100                      | 100                       |
| 40 | <b>6</b> {4,4,2} | C <sub>24</sub> H <sub>23</sub> F <sub>5</sub> Si | 100                      | 99                        |
| 41 | <b>6</b> {4,4,5} | C <sub>24</sub> H <sub>22</sub> F <sub>6</sub> Si | 100                      | 100                       |
| 42 | <b>6</b> {5,1,1} | C <sub>24</sub> H <sub>26</sub> F <sub>2</sub> Si | 99                       | 100                       |
| 43 | <b>6</b> {5,1,2} | C <sub>24</sub> H <sub>25</sub> F <sub>3</sub> Si | 100                      | 100                       |
| 44 | <b>6</b> {5,1,5} | C <sub>24</sub> H <sub>24</sub> F <sub>4</sub> Si | 99                       | 99                        |
| 45 | <b>6</b> {5,2,1} | C <sub>24</sub> H <sub>25</sub> F <sub>3</sub> Si | 91                       | 98                        |
| 46 | <b>6</b> {5,2,2} | C <sub>24</sub> H <sub>24</sub> F <sub>4</sub> Si | 100                      | 98                        |
| 47 | <b>6</b> {5,2,5} | C <sub>24</sub> H <sub>23</sub> F <sub>5</sub> Si | 100                      | 96                        |
| 48 | <b>6</b> {5,3,2} | C <sub>24</sub> H <sub>24</sub> F <sub>4</sub> Si | 82                       | 89                        |
| 49 | <b>6</b> {5,3,5} | C <sub>24</sub> H <sub>23</sub> F <sub>5</sub> Si | 100                      | 98                        |

[a] isolated yield; [b] GC

Table 2 Yield and purity of the terphenyls  $7\{T,H,B\}$ 

| Nr | product  | formula                                          | yield <sup>[a],[b]</sup> [%] | purity <sup>[c]</sup> [%] |
|----|----------|--------------------------------------------------|------------------------------|---------------------------|
| 1  | 7{1,1,1} | C <sub>21</sub> H <sub>19</sub> I                | 89                           | 99                        |
| 2  | 7{1,1,2} | C <sub>21</sub> H <sub>18</sub> FI               | 94                           | 99                        |
| 3  | 7{1,1,5} | C <sub>21</sub> H <sub>17</sub> F <sub>2</sub> I | 98                           | 98                        |
| 4  | 7{1,2,1} | C <sub>21</sub> H <sub>18</sub> FI               | 75                           | 99                        |
| 5  | 7{1,2,2} | C <sub>21</sub> H <sub>17</sub> F <sub>2</sub> I | 94                           | 97                        |
| 6  | 7{1,2,5} | C <sub>21</sub> H <sub>16</sub> F <sub>3</sub> I | 82                           | 99                        |
| 7  | 7{1,3,2} | C <sub>21</sub> H <sub>17</sub> F <sub>2</sub> I | 87                           | 99                        |
| 8  | 7{1,3,5} | C <sub>21</sub> H <sub>16</sub> F <sub>3</sub> I | 94                           | 99                        |
| 9  | 7{1,4,1} | C <sub>21</sub> H <sub>17</sub> F <sub>2</sub> I | 89                           | 98                        |
| 10 | 7{1,4,2} | C <sub>21</sub> H <sub>16</sub> F <sub>3</sub> I | 94                           | 99                        |
| 11 | 7{1,4,5} | C <sub>21</sub> H <sub>15</sub> F <sub>4</sub> I | 94                           | 100                       |
| 12 | 7{2,1,1} | C <sub>21</sub> H <sub>18</sub> FI               | 89                           | 100                       |
| 13 | 7{2,1,2} | C <sub>21</sub> H <sub>17</sub> F <sub>2</sub> I | 94                           | 100                       |
| 14 | 7{2,1,5} | C <sub>21</sub> H <sub>16</sub> F <sub>3</sub> I | 91                           | 91                        |
| 15 | 7{2,2,1} | C <sub>21</sub> H <sub>17</sub> F <sub>2</sub> I | 79                           | 98                        |
| 16 | 7{2,2,2} | C <sub>21</sub> H <sub>16</sub> F <sub>3</sub> I | 77                           | 99                        |
| 17 | 7{2,2,5} | C <sub>21</sub> H <sub>15</sub> F <sub>4</sub> I | 81                           | 98                        |
| 18 | 7{2,3,2} | C <sub>21</sub> H <sub>16</sub> F <sub>3</sub> I | 87                           | 100                       |
| 19 | 7{2,3,5} | C <sub>21</sub> H <sub>15</sub> F <sub>4</sub> I | 92                           | 99                        |
| 20 | 7{3,1,1} | C <sub>21</sub> H <sub>18</sub> FI               | 92                           | 98                        |
| 21 | 7{3,1,2} | C <sub>21</sub> H <sub>17</sub> F <sub>2</sub> I | 94                           | 99                        |
| 22 | 7{3,1,5} | C <sub>21</sub> H <sub>16</sub> F <sub>3</sub> I | 91                           | 98                        |
| 23 | 7{3,2,1} | C <sub>21</sub> H <sub>17</sub> F <sub>2</sub> I | 82                           | 99                        |
| 24 | 7{3,2,2} | C <sub>21</sub> H <sub>16</sub> F <sub>3</sub> I | 93                           | 100                       |
| 25 | 7{3,2,5} | C <sub>21</sub> H <sub>15</sub> F <sub>4</sub> I | 80                           | 97                        |
| 26 | 7{3,3,2} | C <sub>21</sub> H <sub>16</sub> F <sub>3</sub> I | 85                           | 99                        |
| 27 | 7{3,3,5} | C <sub>21</sub> H <sub>15</sub> F <sub>4</sub> I | 94                           | 98                        |
| 28 | 7{3,4,1} | C <sub>21</sub> H <sub>16</sub> F <sub>3</sub> I | 96                           | 100                       |
| 29 | 7{3,4,2} | C <sub>21</sub> H <sub>15</sub> F <sub>4</sub> I | 96                           | 100                       |
| 30 | 7{3,4,5} | C <sub>21</sub> H <sub>14</sub> F <sub>5</sub> I | 97                           | 99                        |
| 31 | 7{4,1,1} | C <sub>21</sub> H <sub>17</sub> F <sub>2</sub> I | 83                           | 100                       |
| 32 | 7{4,1,2} | C <sub>21</sub> H <sub>16</sub> F <sub>3</sub> I | 82                           | 100                       |
| 33 | 7{4,1,5} | C <sub>21</sub> H <sub>15</sub> F <sub>4</sub> I | 97                           | 97                        |
| 34 | 7{4,2,1} | C <sub>21</sub> H <sub>16</sub> F <sub>3</sub> I | 78                           | 99                        |
| 35 | 7{4,2,2} | C <sub>21</sub> H <sub>15</sub> F <sub>4</sub> I | 92                           | 99                        |
| 36 | 7{4,2,5} | C <sub>21</sub> H <sub>14</sub> F <sub>5</sub> I | 80                           | 91                        |
| 37 | 7{4,3,2} | C <sub>21</sub> H <sub>15</sub> F <sub>4</sub> I | 87                           | 100                       |
| 38 | 7{4,3,5} | C <sub>21</sub> H <sub>14</sub> F <sub>5</sub> I | 90                           | 98                        |
| 39 | 7{4,4,1} | C <sub>21</sub> H <sub>15</sub> F <sub>4</sub> I | 92                           | 99                        |
| 40 | 7{4,4,2} | C <sub>21</sub> H <sub>14</sub> F <sub>5</sub> I | 92                           | 99                        |
| 41 | 7{4,4,5} | C <sub>21</sub> H <sub>13</sub> F <sub>6</sub> I | 92                           | 98                        |
| 42 | 7{5,1,1} | C <sub>21</sub> H <sub>17</sub> F <sub>2</sub> I | 92                           | 100                       |
| 43 | 7{5,1,2} | C <sub>21</sub> H <sub>16</sub> F <sub>3</sub> I | 95                           | 99                        |
| 44 | 7{5,1,5} | C <sub>21</sub> H <sub>15</sub> F <sub>4</sub> I | 96                           | 96                        |
| 45 | 7{5,2,1} | C <sub>21</sub> H <sub>16</sub> F <sub>3</sub> I | 78                           | 95                        |
| 46 | 7{5,2,2} | C <sub>21</sub> H <sub>15</sub> F <sub>4</sub> I | 94                           | 100                       |
| 47 | 7{5,2,5} | C <sub>21</sub> H <sub>14</sub> F <sub>5</sub> I | 94                           | 93                        |
| 48 | 7{5,3,2} | C <sub>21</sub> H <sub>15</sub> F <sub>4</sub> I | 70                           | 93                        |
| 49 | 7{5,3,5} | C <sub>21</sub> H <sub>14</sub> F <sub>5</sub> I | 100                          | 98                        |

[a] isolated yield; [b] over two steps from biphenyl starting-material; [c] GC

Table 3 Yield and purity of the quaterphenyls  $\mathbf{8}\{T,H,B,T\}$ 

| Nr | product                 | formula                                        | yield <sup>[a]</sup> [%] | purity <sup>[b]</sup> [%] |
|----|-------------------------|------------------------------------------------|--------------------------|---------------------------|
| 1  | $\mathbf{8}\{1,1,1,1\}$ | C <sub>30</sub> H <sub>30</sub>                | 92                       | 100                       |
| 2  | $\mathbf{8}\{1,1,1,2\}$ | C <sub>30</sub> H <sub>29</sub> F              | 92                       | 100                       |
| 3  | $\mathbf{8}\{1,1,1,4\}$ | C <sub>30</sub> H <sub>28</sub> F <sub>2</sub> | 91                       | 95.1                      |
| 4  | $\mathbf{8}\{1,1,2,1\}$ | C <sub>30</sub> H <sub>29</sub> F              | 74                       | 100                       |
| 5  | $\mathbf{8}\{1,1,2,2\}$ | C <sub>30</sub> H <sub>28</sub> F <sub>2</sub> | 86                       | 100                       |
| 6  | $\mathbf{8}\{1,1,2,3\}$ | C <sub>30</sub> H <sub>28</sub> F <sub>2</sub> | 84                       | 100                       |
| 7  | $\mathbf{8}\{1,1,2,4\}$ | C <sub>30</sub> H <sub>27</sub> F <sub>3</sub> | 82                       | 100                       |
| 8  | $\mathbf{8}\{1,1,2,5\}$ | C <sub>30</sub> H <sub>27</sub> F <sub>3</sub> | 83                       | 100                       |
| 9  | $\mathbf{8}\{1,1,5,1\}$ | C <sub>30</sub> H <sub>28</sub> F <sub>2</sub> | 88                       | 100                       |
| 10 | $\mathbf{8}\{1,1,5,2\}$ | C <sub>30</sub> H <sub>27</sub> F <sub>3</sub> | 82                       | 100                       |
| 11 | $\mathbf{8}\{1,1,5,3\}$ | C <sub>30</sub> H <sub>27</sub> F <sub>3</sub> | 93                       | 100                       |
| 12 | $\mathbf{8}\{1,1,5,4\}$ | C <sub>30</sub> H <sub>26</sub> F <sub>4</sub> | 93                       | 100                       |
| 13 | $\mathbf{8}\{1,1,5,5\}$ | C <sub>30</sub> H <sub>26</sub> F <sub>4</sub> | 83                       | 100                       |
| 14 | $\mathbf{8}\{1,2,1,1\}$ | C <sub>30</sub> H <sub>29</sub> F              | 86                       | 100                       |
| 15 | $\mathbf{8}\{1,2,1,2\}$ | C <sub>30</sub> H <sub>28</sub> F <sub>2</sub> | 87                       | 100                       |
| 16 | $\mathbf{8}\{1,2,1,3\}$ | C <sub>30</sub> H <sub>28</sub> F <sub>2</sub> | 85                       | 100                       |
| 17 | $\mathbf{8}\{1,2,1,4\}$ | C <sub>30</sub> H <sub>27</sub> F <sub>3</sub> | 81                       | 100                       |
| 18 | $\mathbf{8}\{1,2,1,5\}$ | C <sub>30</sub> H <sub>27</sub> F <sub>3</sub> | 82                       | 100                       |
| 19 | $\mathbf{8}\{1,2,2,1\}$ | C <sub>30</sub> H <sub>28</sub> F <sub>2</sub> | 87                       | 100                       |
| 20 | $\mathbf{8}\{1,2,2,2\}$ | C <sub>30</sub> H <sub>27</sub> F <sub>3</sub> | 79                       | 100                       |
| 21 | $\mathbf{8}\{1,2,2,3\}$ | C <sub>30</sub> H <sub>27</sub> F <sub>3</sub> | 83                       | 100                       |
| 22 | $\mathbf{8}\{1,2,2,4\}$ | C <sub>30</sub> H <sub>26</sub> F <sub>4</sub> | 89                       | 100                       |
| 23 | $\mathbf{8}\{1,2,2,5\}$ | C <sub>30</sub> H <sub>26</sub> F <sub>4</sub> | 82                       | 100                       |
| 24 | $\mathbf{8}\{1,2,5,1\}$ | C <sub>30</sub> H <sub>27</sub> F <sub>3</sub> | 81                       | 100                       |
| 25 | $\mathbf{8}\{1,2,5,2\}$ | C <sub>30</sub> H <sub>26</sub> F <sub>4</sub> | 63                       | 100                       |
| 26 | $\mathbf{8}\{1,2,5,3\}$ | C <sub>30</sub> H <sub>26</sub> F <sub>4</sub> | 80                       | 100                       |
| 27 | $\mathbf{8}\{1,2,5,4\}$ | C <sub>30</sub> H <sub>25</sub> F <sub>5</sub> | 77                       | 100                       |
| 28 | $\mathbf{8}\{1,2,5,5\}$ | C <sub>30</sub> H <sub>25</sub> F <sub>5</sub> | 79                       | 100                       |
| 29 | $\mathbf{8}\{1,3,2,1\}$ | C <sub>30</sub> H <sub>28</sub> F <sub>2</sub> | 88                       | 100                       |
| 30 | $\mathbf{8}\{1,3,2,2\}$ | C <sub>30</sub> H <sub>27</sub> F <sub>3</sub> | 91                       | 100                       |
| 31 | $\mathbf{8}\{1,3,2,4\}$ | C <sub>30</sub> H <sub>26</sub> F <sub>4</sub> | 62                       | 100                       |
| 32 | $\mathbf{8}\{1,3,5,1\}$ | C <sub>30</sub> H <sub>27</sub> F <sub>3</sub> | 76                       | 100                       |
| 33 | $\mathbf{8}\{1,3,5,2\}$ | C <sub>30</sub> H <sub>26</sub> F <sub>4</sub> | 85                       | 100                       |
| 34 | $\mathbf{8}\{1,3,5,3\}$ | C <sub>30</sub> H <sub>26</sub> F <sub>4</sub> | 81                       | 100                       |
| 35 | $\mathbf{8}\{1,3,5,4\}$ | C <sub>30</sub> H <sub>25</sub> F <sub>5</sub> | 93                       | 100                       |
| 36 | $\mathbf{8}\{1,3,5,5\}$ | C <sub>30</sub> H <sub>25</sub> F <sub>5</sub> | 84                       | 100                       |
| 37 | $\mathbf{8}\{1,4,1,1\}$ | C <sub>30</sub> H <sub>28</sub> F <sub>2</sub> | 80                       | 100                       |
| 38 | $\mathbf{8}\{1,4,1,2\}$ | C <sub>30</sub> H <sub>27</sub> F <sub>3</sub> | 83                       | 100                       |
| 39 | $\mathbf{8}\{1,4,1,3\}$ | C <sub>30</sub> H <sub>27</sub> F <sub>3</sub> | 84                       | 100                       |
| 40 | $\mathbf{8}\{1,4,1,4\}$ | C <sub>30</sub> H <sub>26</sub> F <sub>4</sub> | 80                       | 100                       |
| 41 | $\mathbf{8}\{1,4,1,5\}$ | C <sub>30</sub> H <sub>26</sub> F <sub>4</sub> | 74                       | 100                       |
| 42 | $\mathbf{8}\{1,4,2,1\}$ | C <sub>30</sub> H <sub>27</sub> F <sub>3</sub> | 81                       | 100                       |
| 43 | $\mathbf{8}\{1,4,2,2\}$ | C <sub>30</sub> H <sub>26</sub> F <sub>4</sub> | 98                       | 100                       |
| 44 | $\mathbf{8}\{1,4,2,3\}$ | C <sub>30</sub> H <sub>26</sub> F <sub>4</sub> | 74                       | 100                       |
| 45 | $\mathbf{8}\{1,4,2,4\}$ | C <sub>30</sub> H <sub>25</sub> F <sub>5</sub> | 88                       | 100                       |
| 46 | $\mathbf{8}\{1,4,2,5\}$ | C <sub>30</sub> H <sub>25</sub> F <sub>5</sub> | 84                       | 100                       |
| 47 | $\mathbf{8}\{1,4,5,1\}$ | C <sub>30</sub> H <sub>26</sub> F <sub>4</sub> | 92                       | 100                       |
| 48 | $\mathbf{8}\{1,4,5,2\}$ | C <sub>30</sub> H <sub>25</sub> F <sub>5</sub> | 87                       | 100                       |
| 49 | $\mathbf{8}\{1,4,5,3\}$ | C <sub>30</sub> H <sub>25</sub> F <sub>5</sub> | 79                       | 100                       |
| 50 | $\mathbf{8}\{1,4,5,4\}$ | C <sub>30</sub> H <sub>24</sub> F <sub>6</sub> | 78                       | 100                       |
| 51 | $\mathbf{8}\{1,4,5,5\}$ | C <sub>30</sub> H <sub>24</sub> F <sub>6</sub> | 74                       | 100                       |
| 52 | $\mathbf{8}\{2,1,1,2\}$ | C <sub>30</sub> H <sub>28</sub> F <sub>2</sub> | 96                       | 100                       |
| 53 | $\mathbf{8}\{2,1,1,3\}$ | C <sub>30</sub> H <sub>28</sub> F <sub>2</sub> | 96                       | 100                       |
| 54 | $\mathbf{8}\{2,1,1,5\}$ | C <sub>30</sub> H <sub>27</sub> F <sub>3</sub> | 87                       | 100                       |
| 55 | $\mathbf{8}\{2,1,2,1\}$ | C <sub>30</sub> H <sub>28</sub> F <sub>2</sub> | 90                       | 100                       |
| 56 | $\mathbf{8}\{2,1,2,2\}$ | C <sub>30</sub> H <sub>27</sub> F <sub>3</sub> | 81                       | 100                       |
| 57 | $\mathbf{8}\{2,1,2,3\}$ | C <sub>30</sub> H <sub>27</sub> F <sub>3</sub> | 82                       | 100                       |
| 58 | $\mathbf{8}\{2,1,2,4\}$ | C <sub>30</sub> H <sub>26</sub> F <sub>4</sub> | 85                       | 100                       |
| 59 | $\mathbf{8}\{2,1,2,5\}$ | C <sub>30</sub> H <sub>26</sub> F <sub>4</sub> | 83                       | 100                       |

| Nr  | product            | formula                                        | yield <sup>[a]</sup> [%] | purity <sup>[b]</sup> [%] |
|-----|--------------------|------------------------------------------------|--------------------------|---------------------------|
| 60  | <b>8</b> {2,1,5,1} | C <sub>30</sub> H <sub>27</sub> F <sub>3</sub> | 81                       | 100                       |
| 61  | <b>8</b> {2,1,5,2} | C <sub>30</sub> H <sub>26</sub> F <sub>4</sub> | 75                       | 100                       |
| 62  | <b>8</b> {2,1,5,3} | C <sub>30</sub> H <sub>26</sub> F <sub>4</sub> | 73                       | 96.5                      |
| 63  | <b>8</b> {2,1,5,4} | C <sub>30</sub> H <sub>25</sub> F <sub>5</sub> | 68                       | 98.3                      |
| 64  | <b>8</b> {2,1,5,5} | C <sub>30</sub> H <sub>25</sub> F <sub>5</sub> | 93                       | 100                       |
| 65  | <b>8</b> {2,2,1,1} | C <sub>30</sub> H <sub>28</sub> F <sub>2</sub> | 82                       | 100                       |
| 66  | <b>8</b> {2,2,1,2} | C <sub>30</sub> H <sub>27</sub> F <sub>3</sub> | 84                       | 100                       |
| 67  | <b>8</b> {2,2,1,3} | C <sub>30</sub> H <sub>27</sub> F <sub>3</sub> | 90                       | 100                       |
| 68  | <b>8</b> {2,2,1,4} | C <sub>30</sub> H <sub>26</sub> F <sub>4</sub> | 95                       | 100                       |
| 69  | <b>8</b> {2,2,1,5} | C <sub>30</sub> H <sub>26</sub> F <sub>4</sub> | 81                       | 100                       |
| 70  | <b>8</b> {2,2,2,1} | C <sub>30</sub> H <sub>27</sub> F <sub>3</sub> | 82                       | 100                       |
| 71  | <b>8</b> {2,2,2,2} | C <sub>30</sub> H <sub>26</sub> F <sub>4</sub> | 99                       | 100                       |
| 72  | <b>8</b> {2,2,2,3} | C <sub>30</sub> H <sub>26</sub> F <sub>4</sub> | 81                       | 100                       |
| 73  | <b>8</b> {2,2,2,4} | C <sub>30</sub> H <sub>25</sub> F <sub>5</sub> | 38                       | 100                       |
| 74  | <b>8</b> {2,2,2,5} | C <sub>30</sub> H <sub>25</sub> F <sub>5</sub> | 88                       | 100                       |
| 75  | <b>8</b> {2,2,5,1} | C <sub>30</sub> H <sub>26</sub> F <sub>4</sub> | 85                       | 100                       |
| 76  | <b>8</b> {2,2,5,2} | C <sub>30</sub> H <sub>25</sub> F <sub>5</sub> | 91                       | 100                       |
| 77  | <b>8</b> {2,2,5,3} | C <sub>30</sub> H <sub>25</sub> F <sub>5</sub> | 77                       | 100                       |
| 78  | <b>8</b> {2,2,5,4} | C <sub>30</sub> H <sub>24</sub> F <sub>6</sub> | 31                       | 100                       |
| 79  | <b>8</b> {2,2,5,5} | C <sub>30</sub> H <sub>24</sub> F <sub>6</sub> | 84                       | 100                       |
| 80  | <b>8</b> {2,3,2,2} | C <sub>30</sub> H <sub>26</sub> F <sub>4</sub> | 81                       | 100                       |
| 81  | <b>8</b> {2,3,2,3} | C <sub>30</sub> H <sub>26</sub> F <sub>4</sub> | 97                       | 100                       |
| 82  | <b>8</b> {2,3,2,5} | C <sub>30</sub> H <sub>25</sub> F <sub>5</sub> | 89                       | 100                       |
| 83  | <b>8</b> {2,3,5,1} | C <sub>30</sub> H <sub>26</sub> F <sub>4</sub> | 90                       | 100                       |
| 84  | <b>8</b> {2,3,5,2} | C <sub>30</sub> H <sub>25</sub> F <sub>5</sub> | 85                       | 100                       |
| 85  | <b>8</b> {2,3,5,3} | C <sub>30</sub> H <sub>25</sub> F <sub>5</sub> | 82                       | 100                       |
| 86  | <b>8</b> {2,3,5,4} | C <sub>30</sub> H <sub>24</sub> F <sub>6</sub> | 83                       | 100                       |
| 87  | <b>8</b> {2,3,3,5} | C <sub>30</sub> H <sub>24</sub> F <sub>6</sub> | 98                       | 100                       |
| 88  | <b>8</b> {3,1,1,1} | C <sub>30</sub> H <sub>29</sub> F              | 77                       | 100                       |
| 89  | <b>8</b> {3,1,1,3} | C <sub>30</sub> H <sub>28</sub> F <sub>2</sub> | 89                       | 100                       |
| 90  | <b>8</b> {3,1,1,4} | C <sub>30</sub> H <sub>27</sub> F <sub>3</sub> | 81                       | 100                       |
| 91  | <b>8</b> {3,1,2,1} | C <sub>30</sub> H <sub>28</sub> F <sub>2</sub> | 82                       | 100                       |
| 92  | <b>8</b> {3,1,2,2} | C <sub>30</sub> H <sub>27</sub> F <sub>3</sub> | 84                       | 100                       |
| 93  | <b>8</b> {3,1,2,3} | C <sub>30</sub> H <sub>27</sub> F <sub>3</sub> | 87                       | 100                       |
| 94  | <b>8</b> {3,1,2,4} | C <sub>30</sub> H <sub>26</sub> F <sub>4</sub> | 86                       | 100                       |
| 95  | <b>8</b> {3,1,2,5} | C <sub>30</sub> H <sub>26</sub> F <sub>4</sub> | 72                       | 100                       |
| 96  | <b>8</b> {3,1,5,1} | C <sub>30</sub> H <sub>27</sub> F <sub>3</sub> | 84                       | 100                       |
| 97  | <b>8</b> {3,1,5,2} | C <sub>30</sub> H <sub>26</sub> F <sub>4</sub> | 77                       | 100                       |
| 98  | <b>8</b> {3,1,5,3} | C <sub>30</sub> H <sub>26</sub> F <sub>4</sub> | 77                       | 100                       |
| 99  | <b>8</b> {3,1,5,4} | C <sub>30</sub> H <sub>25</sub> F <sub>5</sub> | 43                       | 100                       |
| 100 | <b>8</b> {3,1,5,5} | C <sub>30</sub> H <sub>25</sub> F <sub>5</sub> | 86                       | 100                       |
| 101 | <b>8</b> {3,2,1,1} | C <sub>30</sub> H <sub>28</sub> F <sub>2</sub> | 87                       | 100                       |
| 102 | <b>8</b> {3,2,1,2} | C <sub>30</sub> H <sub>27</sub> F <sub>3</sub> | 98                       | 100                       |
| 103 | <b>8</b> {3,2,1,3} | C <sub>30</sub> H <sub>27</sub> F <sub>3</sub> | 80                       | 100                       |
| 104 | <b>8</b> {3,2,1,4} | C <sub>30</sub> H <sub>26</sub> F <sub>4</sub> | 70                       | 100                       |
| 105 | <b>8</b> {3,2,1,5} | C <sub>30</sub> H <sub>26</sub> F <sub>4</sub> | 86                       | 100                       |
| 106 | <b>8</b> {3,2,2,1} | C <sub>30</sub> H <sub>27</sub> F <sub>3</sub> | 77                       | 100                       |
| 107 | <b>8</b> {3,2,2,2} | C <sub>30</sub> H <sub>26</sub> F <sub>4</sub> | 83                       | 100                       |
| 108 | <b>8</b> {3,2,2,3} | C <sub>30</sub> H <sub>26</sub> F <sub>4</sub> | 83                       | 100                       |
| 109 | <b>8</b> {3,2,2,4} | C <sub>30</sub> H <sub>25</sub> F <sub>5</sub> | 74                       | 100                       |
| 110 | <b>8</b> {3,2,2,5} | C <sub>30</sub> H <sub>25</sub> F <sub>5</sub> | 80                       | 100                       |
| 111 | <b>8</b> {3,2,5,1} | C <sub>30</sub> H <sub>26</sub> F <sub>4</sub> | 72                       | 100                       |
| 112 | <b>8</b> {3,2,5,2} | C <sub>30</sub> H <sub>25</sub> F <sub>5</sub> | 80                       | 100                       |
| 113 | <b>8</b> {3,2,5,3} | C <sub>30</sub> H <sub>25</sub> F <sub>5</sub> | 91                       | 100                       |
| 114 | <b>8</b> {3,2,5,4} | C <sub>30</sub> H <sub>24</sub> F <sub>6</sub> | 74                       | 100                       |
| 115 | <b>8</b> {3,2,5,5} | C <sub>30</sub> H <sub>24</sub> F <sub>6</sub> | 88                       | 100                       |
| 116 | <b>8</b> {3,3,2,1} | C <sub>30</sub> H <sub>27</sub> F <sub>3</sub> | 94                       | 100                       |
| 117 | <b>8</b> {3,3,2,3} | C <sub>30</sub> H <sub>26</sub> F <sub>4</sub> | 78                       | 100                       |
| 118 | <b>8</b> {3,3,2,4} | C <sub>30</sub> H <sub>25</sub> F <sub>5</sub> | 69                       | 100                       |
| 119 | <b>8</b> {3,3,5,1} | C <sub>30</sub> H <sub>26</sub> F <sub>4</sub> | 83                       | 99.2                      |

| Nr  | product            | formula                                        | yield <sup>[a]</sup> [%] | purity <sup>[b]</sup> [%] |
|-----|--------------------|------------------------------------------------|--------------------------|---------------------------|
| 120 | <b>8</b> {3,3,5,2} | C <sub>30</sub> H <sub>25</sub> F <sub>5</sub> | 79                       | 99.3                      |
| 121 | <b>8</b> {3,3,5,3} | C <sub>30</sub> H <sub>25</sub> F <sub>5</sub> | 84                       | 99.3                      |
| 122 | <b>8</b> {3,3,5,4} | C <sub>30</sub> H <sub>24</sub> F <sub>6</sub> | 67                       | 100                       |
| 123 | <b>8</b> {3,3,5,5} | C <sub>30</sub> H <sub>24</sub> F <sub>6</sub> | 77                       | 100                       |
| 124 | <b>8</b> {3,4,1,1} | C <sub>30</sub> H <sub>27</sub> F <sub>3</sub> | 84                       | 100                       |
| 125 | <b>8</b> {3,4,1,2} | C <sub>30</sub> H <sub>26</sub> F <sub>4</sub> | 86                       | 100                       |
| 126 | <b>8</b> {3,4,1,3} | C <sub>30</sub> H <sub>26</sub> F <sub>4</sub> | 95                       | 100                       |
| 127 | <b>8</b> {3,4,1,4} | C <sub>30</sub> H <sub>25</sub> F <sub>5</sub> | 71                       | 100                       |
| 128 | <b>8</b> {3,4,1,5} | C <sub>30</sub> H <sub>25</sub> F <sub>5</sub> | 87                       | 100                       |
| 129 | <b>8</b> {3,4,2,1} | C <sub>30</sub> H <sub>26</sub> F <sub>4</sub> | 92                       | 99.5                      |
| 130 | <b>8</b> {3,4,2,2} | C <sub>30</sub> H <sub>25</sub> F <sub>5</sub> | 83                       | 100                       |
| 131 | <b>8</b> {3,4,2,3} | C <sub>30</sub> H <sub>25</sub> F <sub>5</sub> | 92                       | 100                       |
| 132 | <b>8</b> {3,4,2,4} | C <sub>30</sub> H <sub>24</sub> F <sub>6</sub> | 62                       | 98.4                      |
| 133 | <b>8</b> {3,4,2,5} | C <sub>30</sub> H <sub>24</sub> F <sub>6</sub> | 70                       | 100                       |
| 134 | <b>8</b> {3,4,5,1} | C <sub>30</sub> H <sub>25</sub> F <sub>5</sub> | 84                       | 100                       |
| 135 | <b>8</b> {3,4,5,2} | C <sub>30</sub> H <sub>24</sub> F <sub>6</sub> | 84                       | 100                       |
| 136 | <b>8</b> {3,4,5,3} | C <sub>30</sub> H <sub>24</sub> F <sub>6</sub> | 85                       | 100                       |
| 137 | <b>8</b> {3,4,5,4} | C <sub>30</sub> H <sub>23</sub> F <sub>7</sub> | 75                       | 100                       |
| 138 | <b>8</b> {3,4,5,5} | C <sub>30</sub> H <sub>23</sub> F <sub>7</sub> | 63                       | 100                       |
| 139 | <b>8</b> {4,1,1,2} | C <sub>30</sub> H <sub>27</sub> F <sub>3</sub> | 92                       | 100                       |
| 140 | <b>8</b> {4,1,1,4} | C <sub>30</sub> H <sub>26</sub> F <sub>4</sub> | 71                       | 100                       |
| 141 | <b>8</b> {4,1,1,5} | C <sub>30</sub> H <sub>26</sub> F <sub>4</sub> | 95                       | 100                       |
| 142 | <b>8</b> {4,1,2,1} | C <sub>30</sub> H <sub>27</sub> F <sub>3</sub> | 92                       | 100                       |
| 143 | <b>8</b> {4,1,2,2} | C <sub>30</sub> H <sub>26</sub> F <sub>4</sub> | 75                       | 100                       |
| 144 | <b>8</b> {4,1,2,3} | C <sub>30</sub> H <sub>26</sub> F <sub>4</sub> | 91                       | 100                       |
| 145 | <b>8</b> {4,1,2,4} | C <sub>30</sub> H <sub>25</sub> F <sub>5</sub> | 79                       | 100                       |
| 146 | <b>8</b> {4,1,2,5} | C <sub>30</sub> H <sub>25</sub> F <sub>5</sub> | 81                       | 100                       |
| 147 | <b>8</b> {4,1,5,1} | C <sub>30</sub> H <sub>26</sub> F <sub>4</sub> | 99                       | 100                       |
| 148 | <b>8</b> {4,1,5,2} | C <sub>30</sub> H <sub>25</sub> F <sub>5</sub> | 84                       | 100                       |
| 149 | <b>8</b> {4,1,5,3} | C <sub>30</sub> H <sub>25</sub> F <sub>5</sub> | 71                       | 100                       |
| 150 | <b>8</b> {4,1,5,4} | C <sub>30</sub> H <sub>24</sub> F <sub>6</sub> | 77                       | 100                       |
| 151 | <b>8</b> {4,1,5,5} | C <sub>30</sub> H <sub>24</sub> F <sub>6</sub> | 91                       | 100                       |
| 152 | <b>8</b> {4,2,1,1} | C <sub>30</sub> H <sub>27</sub> F <sub>3</sub> | 84                       | 100                       |
| 153 | <b>8</b> {4,2,1,2} | C <sub>30</sub> H <sub>26</sub> F <sub>4</sub> | 85                       | 100                       |
| 154 | <b>8</b> {4,2,1,3} | C <sub>30</sub> H <sub>26</sub> F <sub>4</sub> | 88                       | 100                       |
| 155 | <b>8</b> {4,2,1,4} | C <sub>30</sub> H <sub>25</sub> F <sub>5</sub> | 77                       | 100                       |
| 156 | <b>8</b> {4,2,1,5} | C <sub>30</sub> H <sub>25</sub> F <sub>5</sub> | 82                       | 100                       |
| 157 | <b>8</b> {4,2,2,1} | C <sub>30</sub> H <sub>26</sub> F <sub>4</sub> | 91                       | 100                       |
| 158 | <b>8</b> {4,2,2,2} | C <sub>30</sub> H <sub>25</sub> F <sub>5</sub> | 82                       | 100                       |
| 159 | <b>8</b> {4,2,2,3} | C <sub>30</sub> H <sub>25</sub> F <sub>5</sub> | 56                       | 100                       |
| 160 | <b>8</b> {4,2,2,4} | C <sub>30</sub> H <sub>24</sub> F <sub>6</sub> | 78                       | 100                       |
| 161 | <b>8</b> {4,2,2,5} | C <sub>30</sub> H <sub>24</sub> F <sub>6</sub> | 68                       | 100                       |
| 162 | <b>8</b> {4,2,5,1} | C <sub>30</sub> H <sub>25</sub> F <sub>5</sub> | 76                       | 100                       |
| 163 | <b>8</b> {4,2,5,2} | C <sub>30</sub> H <sub>24</sub> F <sub>6</sub> | 77                       | 100                       |
| 164 | <b>8</b> {4,2,5,3} | C <sub>30</sub> H <sub>24</sub> F <sub>6</sub> | 83                       | 100                       |
| 165 | <b>8</b> {4,2,5,4} | C <sub>30</sub> H <sub>23</sub> F <sub>7</sub> | 81                       | 100                       |
| 166 | <b>8</b> {4,2,5,5} | C <sub>30</sub> H <sub>23</sub> F <sub>7</sub> | 75                       | 95.5                      |
| 167 | <b>8</b> {4,3,2,2} | C <sub>30</sub> H <sub>25</sub> F <sub>5</sub> | 80                       | 100                       |
| 168 | <b>8</b> {4,3,2,4} | C <sub>30</sub> H <sub>24</sub> F <sub>6</sub> | 78                       | 100                       |
| 169 | <b>8</b> {4,3,2,5} | C <sub>30</sub> H <sub>24</sub> F <sub>6</sub> | 90                       | 100                       |
| 170 | <b>8</b> {4,3,5,1} | C <sub>30</sub> H <sub>25</sub> F <sub>5</sub> | 82                       | 100                       |
| 171 | <b>8</b> {4,3,5,2} | C <sub>30</sub> H <sub>24</sub> F <sub>6</sub> | 73                       | 100                       |
| 172 | <b>8</b> {4,3,5,3} | C <sub>30</sub> H <sub>24</sub> F <sub>6</sub> | 40                       | 100                       |
| 173 | <b>8</b> {4,3,5,4} | C <sub>30</sub> H <sub>23</sub> F <sub>7</sub> | 86                       | 100                       |
| 174 | <b>8</b> {4,3,5,5} | C <sub>30</sub> H <sub>23</sub> F <sub>7</sub> | 83                       | 100                       |
| 175 | <b>8</b> {4,4,1,1} | C <sub>30</sub> H <sub>26</sub> F <sub>4</sub> | 81                       | 100                       |
| 176 | <b>8</b> {4,4,1,2} | C <sub>30</sub> H <sub>25</sub> F <sub>5</sub> | 71                       | 100                       |
| 177 | <b>8</b> {4,4,1,3} | C <sub>30</sub> H <sub>25</sub> F <sub>5</sub> | 75                       | 100                       |
| 178 | <b>8</b> {4,4,1,4} | C <sub>30</sub> H <sub>24</sub> F <sub>6</sub> | 76                       | 100                       |
| 179 | <b>8</b> {4,4,1,5} | C <sub>30</sub> H <sub>24</sub> F <sub>6</sub> | 79                       | 100                       |

| Nr  | product            | formula                                        | yield <sup>[a]</sup> [%] | purity <sup>[b]</sup> [%] |
|-----|--------------------|------------------------------------------------|--------------------------|---------------------------|
| 180 | <b>8</b> {4,4,2,1} | C <sub>30</sub> H <sub>25</sub> F <sub>5</sub> | 65                       | 100                       |
| 181 | <b>8</b> {4,4,2,2} | C <sub>30</sub> H <sub>24</sub> F <sub>6</sub> | 66                       | 99.5                      |
| 182 | <b>8</b> {4,4,2,3} | C <sub>30</sub> H <sub>24</sub> F <sub>6</sub> | 83                       | 100                       |
| 183 | <b>8</b> {4,4,2,4} | C <sub>30</sub> H <sub>23</sub> F <sub>7</sub> | 48                       | 100                       |
| 184 | <b>8</b> {4,4,2,5} | C <sub>30</sub> H <sub>23</sub> F <sub>7</sub> | 80                       | 100                       |
| 185 | <b>8</b> {4,4,5,1} | C <sub>30</sub> H <sub>24</sub> F <sub>6</sub> | 58                       | 100                       |
| 186 | <b>8</b> {4,4,5,2} | C <sub>30</sub> H <sub>23</sub> F <sub>7</sub> | 74                       | 100                       |
| 187 | <b>8</b> {4,4,5,3} | C <sub>30</sub> H <sub>23</sub> F <sub>7</sub> | 71                       | 100                       |
| 188 | <b>8</b> {4,4,5,4} | C <sub>30</sub> H <sub>22</sub> F <sub>8</sub> | 73                       | 100                       |
| 189 | <b>8</b> {4,4,5,5} | C <sub>30</sub> H <sub>22</sub> F <sub>8</sub> | 76                       | 100                       |
| 190 | <b>8</b> {5,1,1,1} | C <sub>30</sub> H <sub>28</sub> F <sub>2</sub> | 93                       | 100                       |
| 191 | <b>8</b> {5,1,1,3} | C <sub>30</sub> H <sub>27</sub> F <sub>3</sub> | 80                       | 100                       |
| 192 | <b>8</b> {5,1,1,5} | C <sub>30</sub> H <sub>26</sub> F <sub>4</sub> | 89                       | 100                       |
| 193 | <b>8</b> {5,1,2,1} | C <sub>30</sub> H <sub>27</sub> F <sub>3</sub> | 82                       | 100                       |
| 194 | <b>8</b> {5,1,2,2} | C <sub>30</sub> H <sub>26</sub> F <sub>4</sub> | 79                       | 100                       |
| 195 | <b>8</b> {5,1,2,3} | C <sub>30</sub> H <sub>26</sub> F <sub>4</sub> | 81                       | 100                       |
| 196 | <b>8</b> {5,1,2,4} | C <sub>30</sub> H <sub>25</sub> F <sub>5</sub> | 76                       | 100                       |
| 197 | <b>8</b> {5,1,2,5} | C <sub>30</sub> H <sub>25</sub> F <sub>5</sub> | 87                       | 100                       |
| 198 | <b>8</b> {5,1,5,1} | C <sub>30</sub> H <sub>26</sub> F <sub>4</sub> | 92                       | 100                       |
| 199 | <b>8</b> {5,1,5,2} | C <sub>30</sub> H <sub>25</sub> F <sub>5</sub> | 90                       | 100                       |
| 200 | <b>8</b> {5,1,5,3} | C <sub>30</sub> H <sub>25</sub> F <sub>5</sub> | 93                       | 100                       |
| 201 | <b>8</b> {5,1,5,4} | C <sub>30</sub> H <sub>24</sub> F <sub>6</sub> | 63                       | 100                       |
| 202 | <b>8</b> {5,1,5,5} | C <sub>30</sub> H <sub>24</sub> F <sub>6</sub> | 74                       | 100                       |
| 203 | <b>8</b> {5,2,1,1} | C <sub>30</sub> H <sub>27</sub> F <sub>3</sub> | 84                       | 100                       |
| 204 | <b>8</b> {5,2,1,2} | C <sub>30</sub> H <sub>26</sub> F <sub>4</sub> | 84                       | 100                       |
| 205 | <b>8</b> {5,2,1,3} | C <sub>30</sub> H <sub>26</sub> F <sub>4</sub> | 92                       | 100                       |
| 206 | <b>8</b> {5,2,1,4} | C <sub>30</sub> H <sub>25</sub> F <sub>5</sub> | 79                       | 100                       |
| 207 | <b>8</b> {5,2,1,5} | C <sub>30</sub> H <sub>25</sub> F <sub>5</sub> | 92                       | 100                       |
| 208 | <b>8</b> {5,2,2,1} | C <sub>30</sub> H <sub>26</sub> F <sub>4</sub> | 86                       | 100                       |
| 209 | <b>8</b> {5,2,2,2} | C <sub>30</sub> H <sub>25</sub> F <sub>5</sub> | 83                       | 100                       |
| 210 | <b>8</b> {5,2,2,3} | C <sub>30</sub> H <sub>25</sub> F <sub>5</sub> | 78                       | 100                       |
| 211 | <b>8</b> {5,2,2,4} | C <sub>30</sub> H <sub>24</sub> F <sub>6</sub> | 58                       | 100                       |
| 212 | <b>8</b> {5,2,2,5} | C <sub>30</sub> H <sub>24</sub> F <sub>6</sub> | 80                       | 100                       |
| 213 | <b>8</b> {5,2,5,1} | C <sub>30</sub> H <sub>25</sub> F <sub>5</sub> | 90                       | 98.3                      |
| 214 | <b>8</b> {5,2,5,2} | C <sub>30</sub> H <sub>24</sub> F <sub>6</sub> | 90                       | 100                       |
| 215 | <b>8</b> {5,2,5,3} | C <sub>30</sub> H <sub>24</sub> F <sub>6</sub> | 65                       | 100                       |
| 216 | <b>8</b> {5,2,5,4} | C <sub>30</sub> H <sub>23</sub> F <sub>7</sub> | 83                       | 96.3                      |
| 217 | <b>8</b> {5,2,5,5} | C <sub>30</sub> H <sub>23</sub> F <sub>7</sub> | 93                       | 100                       |
| 218 | <b>8</b> {5,3,2,1} | C <sub>30</sub> H <sub>26</sub> F <sub>4</sub> | 87                       | 100                       |
| 219 | <b>8</b> {5,3,2,3} | C <sub>30</sub> H <sub>25</sub> F <sub>5</sub> | 88                       | 100                       |
| 220 | <b>8</b> {5,3,2,5} | C <sub>30</sub> H <sub>24</sub> F <sub>6</sub> | 84                       | 100                       |
| 221 | <b>8</b> {5,3,5,1} | C <sub>30</sub> H <sub>25</sub> F <sub>5</sub> | 92                       | 100                       |
| 222 | <b>8</b> {5,3,5,2} | C <sub>30</sub> H <sub>24</sub> F <sub>6</sub> | 82                       | 100                       |
| 223 | <b>8</b> {5,3,5,3} | C <sub>30</sub> H <sub>24</sub> F <sub>6</sub> | 68                       | 100                       |
| 224 | <b>8</b> {5,3,5,4} | C <sub>30</sub> H <sub>23</sub> F <sub>7</sub> | 91                       | 100                       |
| 225 | <b>8</b> {5,3,5,5} | C <sub>30</sub> H <sub>23</sub> F <sub>7</sub> | 84                       | 100                       |

[a] isolated yield; [b] HPLC;
